# Supplementary material
Source: publisher figshare collection journal article supplement (https://acs.figshare.com/ndownloader/files/25876826)

# Supplementary Information

## Synthesis of Glycosyl Fluorides by Photochemical Fluorination with Sulfur(VI) Hexafluoride

Sungjin Kim,<sup>#</sup> Yaroslav Khomutnyk,<sup>#</sup> Anton Bannykh,<sup>#</sup> Pavel Nagorny<sup>#\*</sup>

<sup>#</sup>Department of Chemistry, University of Michigan, Ann Arbor, Michigan 48109, United States.

\*nagorny@umich.edu

### Table of contents

|                                                                                                         |               |
|---------------------------------------------------------------------------------------------------------|---------------|
| <b>I. General Information .....</b>                                                                     | <b>2</b>      |
| <b>II. Optimization</b>                                                                                 |               |
| <b>a. Photocatalyst screening .....</b>                                                                 | <b>4</b>      |
| <b>b. Reaction condition optimization .....</b>                                                         | <b>5</b>      |
| <b>III. Experimental Procedures and Characterization Data .....</b>                                     | <b>6–46</b>   |
| <b>a. Synthesis of photocatalysts .....</b>                                                             | <b>6</b>      |
| <b>b. Synthesis and characterization data for substrates (1).....</b>                                   | <b>7–27</b>   |
| <b>c. Synthesis of glycosyl fluorides 2 (general information).....</b>                                  | <b>28–29</b>  |
| <b>d. Summary of <i>a:b</i> ratios for 1 and 2 .....</b>                                                | <b>30</b>     |
| <b>e. Summary of previous methods for the synthesis of 2.....</b>                                       | <b>30</b>     |
| <b>f. Experimentals and characterization data for products 2 .....</b>                                  | <b>31–47</b>  |
| <b>d. Large Scale Batch Synthesis .....</b>                                                             | <b>48</b>     |
| <b>IV. Continuous Flow Synthesis .....</b>                                                              | <b>49–52</b>  |
| <b>a. Information of the Flow Equipment.....</b>                                                        | <b>49</b>     |
| <b>b. Small Scale Continuous Flow Setup with a Steel Syringe.....</b>                                   | <b>50</b>     |
| <b>c. Large Scale Continuous Cyclic Flow Setup with an HPLC Pump.....</b>                               | <b>51–52</b>  |
| <b>V. UV-Vis Spectra of Photocatalysts .....</b>                                                        | <b>53–56</b>  |
| <b>VI. Studies of the Reaction Mechanism. ....</b>                                                      | <b>57–82</b>  |
| <b>a. Control Experiment.....</b>                                                                       | <b>57</b>     |
| <b>b. Light On/Off Experiment.....</b>                                                                  | <b>57</b>     |
| <b>c. Catalyst Decomposition Products.....</b>                                                          | <b>58–77</b>  |
| <b>d. SF<sub>6</sub> Decomposition Side-products and FSO<sub>3</sub><sup>-</sup> Determination.....</b> | <b>78</b>     |
| <b>e. Determination of active S-F species by PPh<sub>3</sub> Quenching Experiment .....</b>             | <b>79–80</b>  |
| <b>f. Fluorination with Pre-Formed Ketyl Radical.....</b>                                               | <b>81–82</b>  |
| <b>VII. NMR Spectra .....</b>                                                                           | <b>83–179</b> |

## I. General Information

### Methods and Reagents:

Unless otherwise stated, all reagents were purchased from commercial suppliers and used without further purification. All reactions were carried out in flame- or oven-dried glassware with magnetic stirring. Reactions were cooled using external cooling baths: ice water (0 °C). Deionized water was used in the preparation of all aqueous solutions and for all aqueous extractions. Solvents used for extraction and chromatography were ACS or HPLC grade. Purification of reaction mixtures was performed by flash column chromatography (FCC) using SiliCycle SilicaFlash P60 (230-400 mesh). Diastereomeric ratios were determined by  $^1\text{H}$  NMR or  $^{19}\text{F}$  NMR analysis.

### Instrumentation:

$^1\text{H}$  NMR spectra were recorded on Varian vnmrs 700 (700 MHz), Varian vnmrs 500 (500 MHz), or Varian INOVA 500 (500 MHz) spectrometers and chemical shifts ( $\delta$ ) are reported in parts per million (ppm) with solvent resonance as the internal standard ( $\text{CDCl}_3$  at  $\delta$  7.26,  $\text{CD}_3\text{CN}$  at  $\delta$  1.94). Data are reported as (br = broad, s = singlet, d = doublet, t = triplet, q = quartet, m = multiplet; coupling constant(s) in Hz; integration). Proton-decoupled  $^{13}\text{C}$  NMR spectra were recorded on Varian vnmrs 700 (700 MHz) or Varian vnmrs 500 (500 MHz) spectrometers and chemical shifts ( $\delta$ ) are reported in ppm with solvent resonance as the internal standard ( $\text{CDCl}_3$  at  $\delta$  77.0,  $\text{CD}_3\text{CN}$  at  $\delta$  118.7).  $^{19}\text{F}$  NMR spectra were recorded on either Varian vnmrs 500 (500 MHz) or Varian vnmrs 400 (400 MHz) spectrometers and chemical shifts ( $\delta$ ) are reported in parts per million (ppm) and are referenced to  $\text{CFCl}_3$  ( $\delta$  0.0). High resolution mass spectra (HRMS) were recorded on Micromass AutoSpec Ultima or VG (Micromass) 70-250-S Magnetic sector mass spectrometers in the University of Michigan mass spectrometry laboratory. Infrared (IR) spectra were recorded as thin films on NaCl plates on a Perkin Elmer Spectrum BX FT-IR spectrometer. Absorption peaks were reported in wavenumbers ( $\text{cm}^{-1}$ ).

### Assignment of Stereochemistry:

Stereochemistry of glycosyl fluoride products (except mannose and rhamnose) are characterized by:

1. One-bond C-F coupling of anomeric carbon in H-coupled  $^{13}\text{C}$  NMR;  $\alpha$ -glycosyl fluoride,  $^1J_{\text{C-F}} = 224 - 228$  Hz and  $\beta$ -glycosyl fluoride,  $^1J_{\text{C-F}} = 213 - 219$  Hz.

2. Three-bond H-H coupling between anomeric hydrogen and C2-hydrogen in  $^1\text{H}$  NMR;  $\alpha$ -glycosyl fluoride,  $^3J_{\text{H-H}} = < 3$  Hz, and  $\beta$ -glycosyl fluoride,  $^3J_{\text{H-H}} = 5.6 - 7.8$  Hz.

For *D*-mannosyl fluorides and *L*-rhamnosyl fluorides:

1. One-bond C-F coupling of anomeric carbon in H-coupled  $^{13}\text{C}$  NMR;  $\alpha$ -anomers,  $^1J_{\text{C-F}} = 221 - 224$  Hz and  $\beta$ -anomers,  $^1J_{\text{C-F}} = 213 - 218$  Hz

When previously reported NMR spectra were available, the stereochemistry of the products was confirmed again by comparing with them.

**Information of the light equipment:**

- a. Kessil H160 Tuna Flora LED (Blue LED) – [Link to the website](#)
  - Peak Wavelength: 452 nm
  
- b. Waveform lighting realUV™ LED Strip Lights (365nm) (UV-A LED) – [Link to the website](#)
  - Peak Wavelength: 369.0 nm
  - UV Output: 0.75 W
  - Radiometric Efficiency: 15%
  - Emission Angle: 120 degree
  
- c. Waveform lighting realUV™ LED Flood Light (365nm) (UV-A Flood Lamp) – [Link to the website](#)
  - Peak Wavelength: 368.5 nm
  - UV Output: 8.0 W
  - Radiometric Efficiency: 40%
  - Emission Angle: 120 degree

**Detailed information of the light sources can be found on the website through the link**

## II. Optimization

### a. Photocatalyst Screening

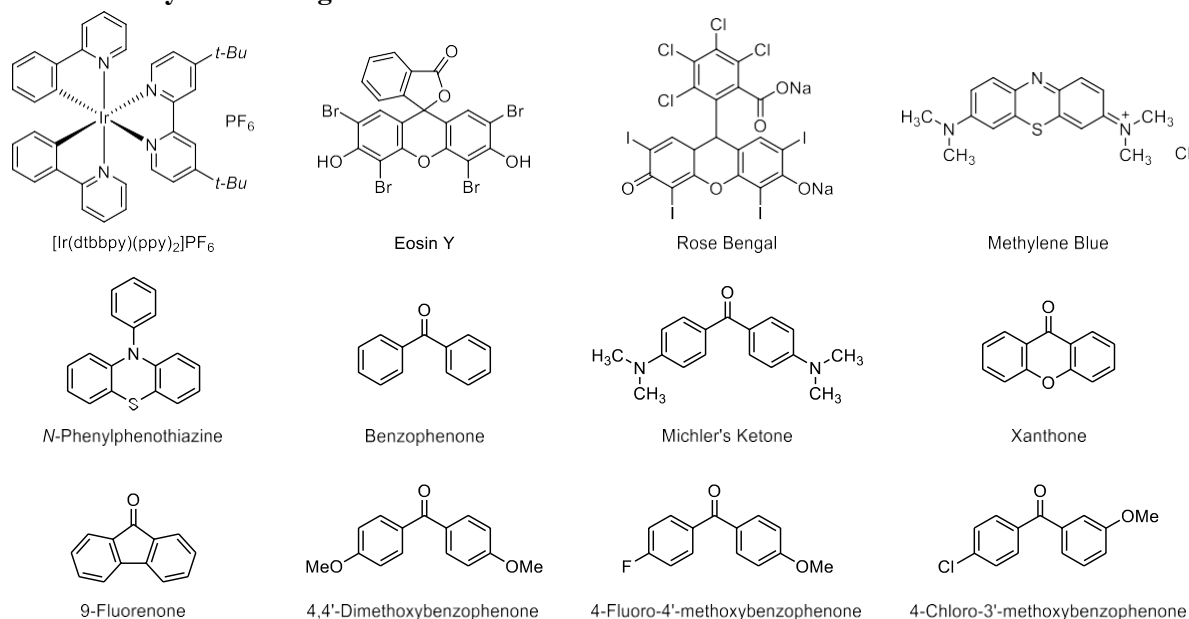

**Table SI-1. Photocatalyst Screening**

| Entry                  | Photocatalyst                                    | Light Source           | NMR Yield <sup>[a]</sup> |
|------------------------|--------------------------------------------------|------------------------|--------------------------|
| <b>1<sup>[b]</sup></b> | <b>Ir(ppy)<sub>2</sub>(dtbbpy)PF<sub>6</sub></b> | <b>Blue LED</b>        | <b>38%</b>               |
| 2                      | Eosin Y                                          | Blue LED               | 7%                       |
| 3                      | Eosin Y                                          | UV-A Flood Lamp        | 9%                       |
| 4                      | Rose Bengal                                      | UV-A Flood Lamp        | -                        |
| 5                      | Methylene Blue                                   | UV-A Flood Lamp        | 33%                      |
| 6                      | N-Phenylphenothiazine                            | UV-A Flood Lamp        | 43%                      |
| 7                      | Benzophenone                                     | Blue LED               | 26%                      |
| 8                      | Benzophenone                                     | UV-A Flood Lamp        | 33%                      |
| 9                      | Michler's Ketone                                 | UV-A Flood Lamp        | 47%                      |
| 10                     | Xanthone                                         | UV-A Flood Lamp        | 25%                      |
| 11                     | 9-Fluorenone                                     | UV-A Flood Lamp        | 7%                       |
| 12                     | 4,4'-Dimethoxybenzophenone                       | Blue LED               | 45%                      |
| <b>13</b>              | <b>4,4'-Dimethoxybenzophenone</b>                | <b>UV-A Flood Lamp</b> | <b>60%</b>               |
| 14                     | 4-Fluoro-4'-methoxybenzophenone                  | UV-A Flood Lamp        | 56%                      |
| 15                     | 4-Chloro-3'-methoxybenzophenone                  | UV-A Flood Lamp        | 29%                      |

[a] Determined by <sup>19</sup>F NMR with α,α,α-trifluorotoluene as an internal standard.

[b] 5 mol% of Ir(ppy)<sub>2</sub>(dtbbpy)PF<sub>6</sub> and 3 eq. of DIPEA were used.

## b. Reaction Condition Optimization

**Table SI-2. Solvent Optimization**

Reaction was conducted in a 1 dram vial

| Entry | Light Source    | Solvent | NMR Yield <sup>[a]</sup>                |
|-------|-----------------|---------|-----------------------------------------|
| 1     | UV-A LED        | DCE     | After 16 h: 40% / 26 h: 47% / 40 h: 55% |
| 2     | UV-A Flood Lamp | Toluene | After 20 h: 21% / 33 h: 25% / 57 h: 36% |
| 3     | UV-A Flood Lamp | EtOAc   | After 20 h: 12% / 33 h: 14% / 57 h: 16% |

[a] Determined by <sup>19</sup>F NMR with α,α,α-trifluorotoluene as an internal standard.

**Table SI-3. Reaction Condition Optimization**

Reaction was conducted in a 1 dram vial

| Entry | Light Source    | Modification                                               | NMR Yield <sup>[a]</sup> |
|-------|-----------------|------------------------------------------------------------|--------------------------|
| 1     | UV-A LED        | Reaction was run for 40 hours                              | 53%                      |
| 2     | UV-A LED        | Oxygen balloon was added alongside SF <sub>6</sub> balloon | 41%                      |
| 3     | UV-A Flood Lamp | 5 eq. of DIPEA                                             | 43%                      |
| 4     | UV-A Flood Lamp | 10 eq. of DIPEA                                            | 61%                      |
| 5     | UV-A Flood Lamp | 20 eq. of DIPEA                                            | 59%                      |
| 6     | UV-A Flood Lamp | 40 eq. of DIPEA                                            | 25%                      |
| 7     | UV-A Flood Lamp | 10 eq. of triethylamine                                    | 52%                      |
| 8     | UV-A Flood Lamp | 10 eq. of quinuclidine                                     | 5.5%                     |

[a] Determined by <sup>19</sup>F NMR with α,α,α-trifluorotoluene as an internal standard.

**Table SI-4. Light Source Optimization**

| Entry | Photocatalyst Loading | Light Source         | Reaction Vessel | Yield              |
|-------|-----------------------|----------------------|-----------------|--------------------|
| 1     | 0.1 eq.               | Two UV-A Flood Lamps | 60 mL syringe   | 84% (46 mg)        |
| 2     | 0.2 eq.               | Two UV-A Flood Lamps | 60 mL syringe   | 77% (42 mg)        |
| 3     | 0.2 eq.               | One UV-A Flood Lamp  | 60 mL syringe   | 80% (44 mg)        |
| 4     | 0.4 eq.               | One UV-A Flood Lamp  | 1 dram vial     | 59% <sup>[a]</sup> |

[a] Determined by <sup>19</sup>F NMR with α,α,α-trifluorotoluene as an internal standard.

### III. Experimental Procedure

#### a. Synthesis of Photocatalysts

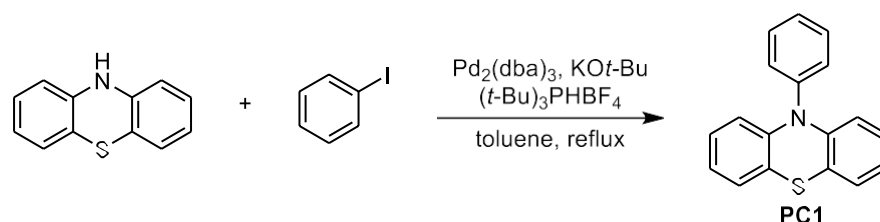

#### Synthesis of N-phenylphenothiazine

In an oven dried round bottom flask, phenothiazine (4.06 mmol, 1.0 equiv.) was dissolved in anhydrous toluene (10 mL). Iodobenzene (4.95 mmol, 1.2 equiv.),  $\text{KO}t\text{-Bu}$  (5.28 mmol, 1.3 equiv.), and  $(t\text{-Bu})_3\text{PHBF}_4$  (0.24 mmol, 0.06 equiv.) were added, followed by the addition of  $\text{Pd}_2(\text{dba})_3$  (0.24 mmol, 0.06 equiv.). The reaction mixture was stirred under reflux for 20 h. After cooling the reaction to room temperature, EtOAc (100 mL) and water (50 mL) were added to the reaction mixture. The aqueous layer was extracted with EtOAc (100 mL x 3). The collected organic phase was dried with  $\text{Na}_2\text{SO}_4$  and concentrated *in vacuo*. The product was purified by FCC ( $\text{SiO}_2$ , pure hexanes) and confirmed by comparing with literature NMR spectra.<sup>1</sup>

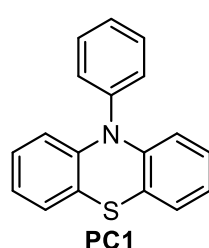

#### N-Phenylphenothiazine (PC1)

<sup>1</sup>H NMR (700 MHz,  $\text{CD}_3\text{CN}$ )  $\delta$  7.64 (t,  $J = 7.7$  Hz, 2H), 7.52 (td,  $J = 7.5, 1.1$  Hz, 1H), 7.39 (dt,  $J = 7.2, 1.1$  Hz, 2H), 7.04 (dt,  $J = 7.5, 1.2$  Hz, 2H), 6.90 (ddd,  $J = 8.4, 7.1, 1.3$  Hz, 2H), 6.84 (tt,  $J = 7.4, 1.1$  Hz, 2H), 6.22 (dt,  $J = 8.3, 1.1$  Hz, 2H); <sup>13</sup>C NMR (176 MHz,  $\text{CD}_3\text{CN}$ )  $\delta$  145.6, 142.4, 132.3, 131.8, 129.7, 128.6, 128.4, 124.1, 121.5, 117.7; IR (thin film,  $\text{cm}^{-1}$ ): 2921, 1584, 1569, 1489, 1459, 1442, 1301, 1254, 1237, 1126, 1070, 1042, 1022, 1003, 969, 935, 898, 854, 774, 751, 740, 704,

693, 631, 617; HRMS (ESI-TOF) ( $m/z$ ):  $[\text{M}]^+$  calcd for  $\text{C}_{18}\text{H}_{13}\text{NS}$  275.0769, found 275.0767.

<sup>1</sup>Speck, F.; Rombach, D.; Wagenknecht, H-A. *Beilstein J. Org. Chem.* **2019**, 15, 52–59.

## b. Synthesis of Substrates

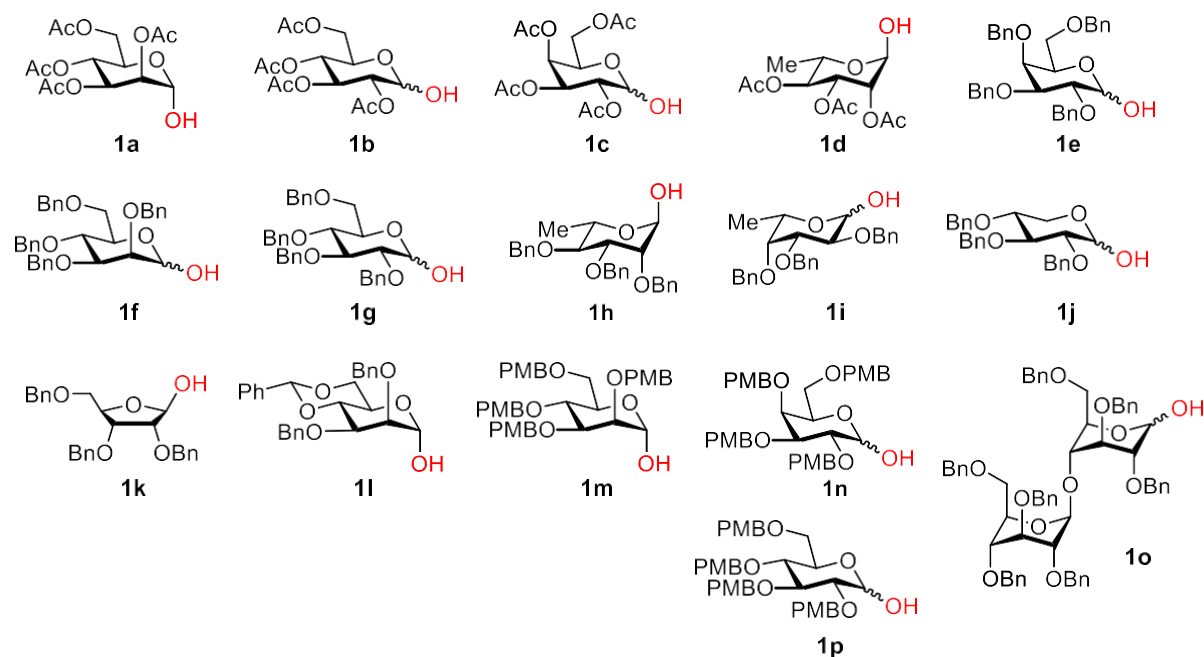

### Preparation of 4-Methoxybenzyl bromide (S1)

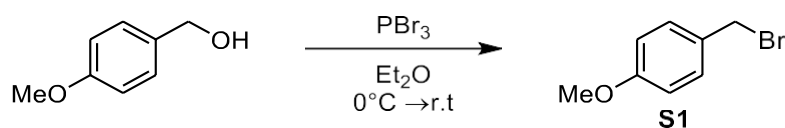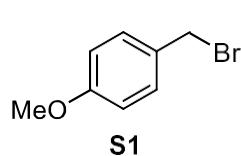

#### 4-Methoxybenzyl bromide (S1)

In a dry round-bottom flask, 4-methoxybenzyl alcohol (112 mmol, 2.8 equiv.) was dissolved with Et<sub>2</sub>O (40 mL). After cooling the mixture by placing the flask in an ice bath, PBr<sub>3</sub> (40 mmol, 1 equiv.) was added dropwise into the reaction mixture. The reaction was stirred for 5 h while it was gradually warmed up to room temperature and quenched by adding aqueous NaCl solution (50 mL). The crude mixture was washed with aqueous NaHCO<sub>3</sub> (saturated, 50 mL) and then aqueous NaCl solution (saturated, 50 mL). The organic layer is concentrated *in vacuo* to yield 4-methoxybenzyl bromide **S1** as colorless liquid. The product was confirmed by <sup>1</sup>H NMR and was subjected to the next synthesis without further purification. <sup>1</sup>H NMR (700 MHz, CDCl<sub>3</sub>) δ 7.33 (d, *J* = 8.6 Hz, 2H), 6.87 (d, *J* = 8.6 Hz, 2H), 4.51 (s, 2H), 3.81 (s, 3H).

### Preparation of 2,3,4,6-tetra-*O*-acetyl-*D*-mannopyranose (1a)

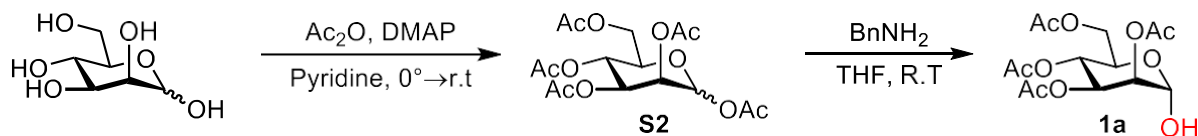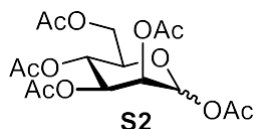

#### 1,2,3,4,6-Penta-*O*-acetyl-*D*-mannopyranoside (S2)

In an oven dried round-bottom flask, *D*-mannose (5.55 mmol, 1.0 equiv.) and pyridine (20 mL) were added. The reaction mixture was stirred until the solution became homogeneous, and then the round-bottom flask was placed in an ice-bath. After the reaction was cooled down, acetic anhydride (33.3 mmol, 6.0 equiv.) and DMAP (0.278 mmol, 0.05 equiv.) were added in that order. The reaction was stirred overnight while it was gradually warmed up to the room temperature. The reaction was quenched by diluting with DCM (150 mL) followed by washing with 1N HCl (150 mL x 2), water (150 mL x 2), and then brine (150 mL). Extracted organic layer was dried with Na<sub>2</sub>SO<sub>4</sub> and was concentrated *in vacuo* to yield 1,2,3,4,6-penta-*O*-acetyl-*D*-mannopyranoside **S2** ( $\alpha:\beta = 6.2:1$ ) as yellowish gum. The product was subjected to the next synthesis without further purification. <sup>1</sup>H NMR (500 MHz, CDCl<sub>3</sub>)  $\delta$  6.09 (d,  $J = 1.9$  Hz, 1H ( $\alpha$ -C<sub>1</sub>-H)), 5.35 (d,  $J = 6.2$  Hz, 2H), 5.30 (s, 1H), 5.27 – 5.26 (m, 1H), 4.29 (dd,  $J = 12.4, 4.9$  Hz, 1H), 4.11 (dd,  $J = 12.4, 2.5$  Hz, 1H), 4.06 (q,  $J = 6.9, 6.2$  Hz, 1H), 2.18 (s, 3H), 2.17 (s, 3H), 2.10 (s, 3H), 2.06 (s, 3H), 2.01 (s, 3H).

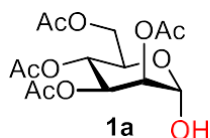

#### 2,3,4,6-Tetra-*O*-acetyl- $\alpha$ -*D*-mannopyranoside (1a)

In an oven dried round-bottom flask, **S2** (2.17 g, 5.55 mmol) and THF (20 mL) were added. The mixture was stirred until the solution became homogeneous, and then benzylamine (0.91 mL, 8.33 mmol) was added. The reaction was stirred at room temperature for 20 hours and quenched by evaporating the solvent under reduced pressure. The crude mixture was diluted with DCM (150 mL) and washed with HCl (1.0 M, 100 mL x 2), NaHCO<sub>3</sub> (saturated, 100 mL), and then water (100 mL). The organic layer was dried with Na<sub>2</sub>SO<sub>4</sub> and was concentrated *in vacuo* to give amber-colored oil. This oil was subjected to FCC (SiO<sub>2</sub>, 20% EtOAc in hexanes  $\rightarrow$  60% EtOAc in hexanes) to afford 2,3,4,6-tetra-*O*-acetyl-*D*-mannopyranoside **1a** as yellowish solid, which was confirmed by comparing with reported NMR spectra.<sup>2</sup> <sup>1</sup>H NMR (700 MHz, Chloroform-*d*)  $\delta$  5.42 (dd,  $J = 10.1, 3.4$  Hz, 1H), 5.30 (t,  $J = 9.8$  Hz, 1H), 5.28 – 5.24 (m, 2H), 4.27 – 4.22 (m, 2H), 4.12 (q,  $J = 7.4$  Hz, 2H), 3.19 (br, 1H), 2.16 (s, 3H), 2.11 (s, 3H), 2.04 (s, 3H), 2.00 (s, 3H).

<sup>2</sup>Carcabal, P.; Hunig, I.; Gamblin, D. P.; Liu, B.; Jockusch, R. A.; Kroemer, R. T.; Snoek, L. C.; Fairbanks, A. J.; Davis, B. G.; Simons, J. P. *J. Am. Chem. Soc.* **2006**, 128, 6, 1976-1981

### Preparation of 2,3,4,6-tetra-*O*-acetyl-*D*-glucopyranoside (**1b**)

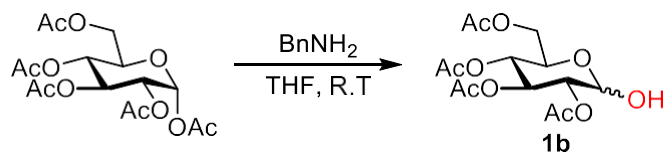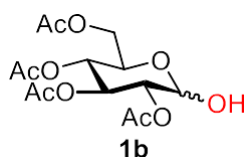

#### 2,3,4,6-Tetra-*O*-acetyl-*D*-glucopyranoside (**1b**)

In an oven dried round-bottom flask, 1,2,3,4,6-penta-*O*-acetyl- $\alpha$ -*D*-glucopyranoside (5.12 mmol, 1.0 equiv.) and THF (20 mL) were added. The mixture was stirred until the solution became homogeneous, and then benzylamine (7.69 mmol, 1.5 equiv.) was added. The reaction was stirred at room temperature for 24 hours and quenched by evaporating the solvent under reduced pressure. The crude mixture was diluted with DCM (150 mL) and washed with 1N HCl (2 x 100 mL), saturated  $\text{NaHCO}_3$  solution (100 mL), and then water (100 mL). The organic layer was dried with  $\text{Na}_2\text{SO}_4$  and was concentrated *in vacuo* to give amber-colored oil. This oil was subjected to FCC ( $\text{SiO}_2$ , 60% EtOAc in hexane) to afford 2,3,4,6-tetra-*O*-acetyl-*D*-glucopyranoside **1b** as yellowish solid, which is confirmed by comparing with literature NMR spectra.<sup>3</sup>

<sup>3</sup>Ikeda, K.; Morimoto, T.; Kakiuchi, K. *J. Org. Chem.* **2010**, 75, 18, 6279–6282

### Preparation of 2,3,4,6-tetra-*O*-acetyl- $\alpha$ -*D*-galactopyranose (**1c**)

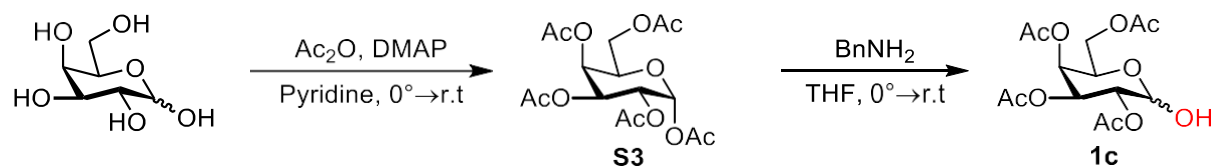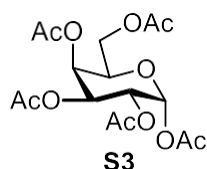

#### 1,2,3,4,6-Penta-*O*-acetyl- $\alpha$ -*D*-galactopyranoside (**S3**)

In an oven dried round-bottom flask, *D*-galactose (5.55 mmol, 1.0 equiv.) and pyridine (20 mL) were added. The reaction mixture was stirred until the solution became homogeneous, and then the round-bottom flask was placed in an ice-bath. After the reaction was cooled down, acetic anhydride (33.3 mmol, 6.0 equiv.) and DMAP (0.278 mmol, 0.05 equiv.) were added in that order. The reaction was stirred overnight while it was gradually warmed up to the room temperature. The reaction was quenched by diluting with DCM (150 mL) followed by washing with 1N HCl (2 x 150 mL), water (2 x 150 mL), and then brine (150 mL). Extracted organic layer was dried with Na<sub>2</sub>SO<sub>4</sub> and was concentrated *in vacuo* to yield 1,2,3,4,6-penta-*O*-acetyl- $\alpha$ -*D*-galactopyranoside **S3** as yellowish gum. The product was subjected to the next synthesis without further purification. <sup>1</sup>H NMR (500 MHz, Chloroform-*d*)  $\delta$  6.38 (d, *J* = 1.8 Hz, 1H), 5.50 (d, *J* = 1.5 Hz, 1H), 5.36–5.32 (m, 2H), 4.34 (td, *J* = 6.6, 1.4 Hz, 1H), 4.14–4.05 (m, 2H), 2.16 (s, 3H), 2.16 (s, 3H), 2.04 (s, 3H), 2.02 (s, 3H), 2.01 (s, 3H).

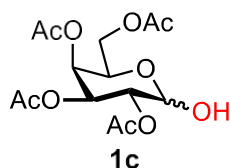

#### 2,3,4,6-tetra-*O*-acetyl- $\alpha$ -*D*-galactopyranoside (**1c**)

In an oven dried round-bottom flask, **S3** (5.55 mmol, 1.0 equiv.) and THF (20 mL) were added. The mixture was stirred until the solution became homogeneous, and then benzylamine (8.33 mmol, 1.5 equiv.) was added. The reaction was stirred at room temperature for 20 hours and quenched by evaporating the solvent under reduced pressure. The crude mixture was diluted with DCM (150 mL) and washed with 1N HCl (100 mL x 2), saturated NaHCO<sub>3</sub> solution (100 mL), and then water (100 mL). The organic layer was dried with Na<sub>2</sub>SO<sub>4</sub> and was concentrated *in vacuo* to give amber-colored oil. This oil was subjected to FCC (SiO<sub>2</sub>, 20% EtOAc in hexanes  $\rightarrow$  60% EtOAc in hexanes) to afford 2,3,4,6-tetra-*O*-acetyl- $\alpha$ -*D*-galactopyranoside **1c** as yellowish solid, which was confirmed by comparing with reported NMR spectra.<sup>4</sup>

<sup>4</sup>Cai, T. B.; Lu, D.; Tang, X.; Zhang, Y.; Landerholm, M.; Wang, P. G. *J. Org. Chem.* **2005**, 70, 9, 3518-3524

### Preparation of 2,3,4-tri-*O*-acetyl- $\alpha$ -*L*-rhamnopyranoside (**1d**)

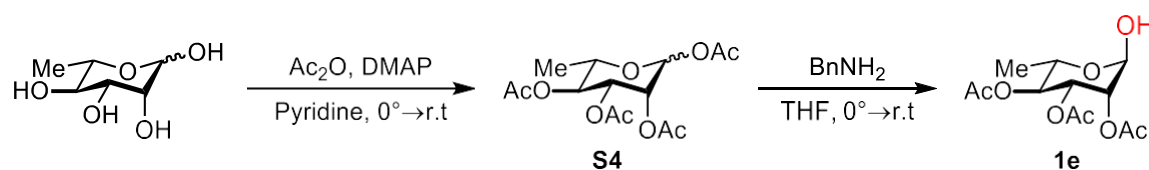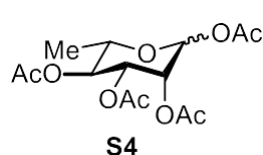

#### 1,2,3,4-Tetra-*O*-acetyl-*L*-rhamnopyranoside (**S4**)

An oven dried round bottom flask was charged with *L*-rhamnose (3.0 mmol, 1.0 equiv.) and anhydrous pyridine (10 mL). After stirring the mixture until it became homogeneous, the round bottom flask was placed in an ice bath and was cooled down to 0°C. Into the cooled down mixture, acetic anhydride (18 mmol, 6.0 equiv.) and DMAP (0.15 mmol, 0.05 equiv.) were added in that order. The reaction was slowly warmed up to room temperature with stirring until all starting materials were gone. The mixture was then diluted with DCM (100 mL) and washed with 1N HCl solution (2 x 80 mL). The organic layer was washed with water (2 x 80 mL) and then saturated brine (2 x 80 mL). The extracted organic layer was dried with Na<sub>2</sub>SO<sub>4</sub> and concentrated *in vacuo* to yield 1,2,3,4-tetra-*O*-acetyl-*L*-rhamnopyranoside **S4** as yellowish gum. The product was then subjected to the next synthesis without further purification.

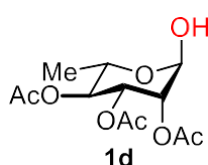

#### 2,3,4-Tri-*O*-acetyl- $\alpha$ -*L*-rhamnopyranoside (**1d**)

In an oven dried round-bottom flask, **S4** (3.0 mmol, 1.0 equiv.) and THF (15 mL) were added. The mixture was stirred until the solution became homogeneous, and then benzylamine (4.5 mmol, 1.5 equiv.) was added. The reaction was stirred at room temperature for 20 hours and quenched by evaporating the solvent under reduced pressure. The crude mixture was diluted with DCM (70 mL) and washed with 1N HCl (2 x 50 mL), saturated NaHCO<sub>3</sub> solution (50 mL), and then water (50 mL). The organic layer was dried with Na<sub>2</sub>SO<sub>4</sub> and was concentrated *in vacuo* to give amber-colored oil. This oil was subjected to FCC (SiO<sub>2</sub>, 20% EtOAc in hexanes  $\rightarrow$  50% EtOAc in hexanes) to afford 2,3,4-tri-*O*-acetyl- $\alpha$ -*L*-rhamnopyranoside **1d** as yellowish solid, which is confirmed by comparing with literature NMR spectra.<sup>5</sup>

<sup>5</sup>Donahue, M. G.; Johnston, J. N. *Bioorg. Med. Chem. Lett.* **2006**, 16, 5602–5604

**Preparation of 2,3,4,6-tetrakis-*O*-(phenylmethyl)-*D*-galactopyranoside (1e)**

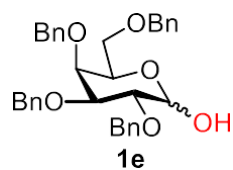

Purchased from Alfa Aesar. Lot#: E28Z019.

**Preparation of 2,3,4,6-tetrakis-*O*-(phenylmethyl)-*D*-Mannopyranoside (1f)**

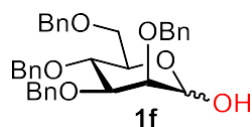

Purchased from Chem-Impex. Lot#: 001684-20150326.

**Preparation of 2,3,4,6-Tetrakis-*O*-(phenylmethyl)-*D*-glucopyranoside (1g)**

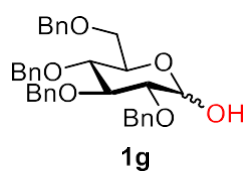

Purchased from CarboSynth. Batch#: MT066911502.

### Preparation of 2,3,4-tri-*O*-(phenylmethyl)- $\alpha$ -*L*-rhamnopyranoside (1h)

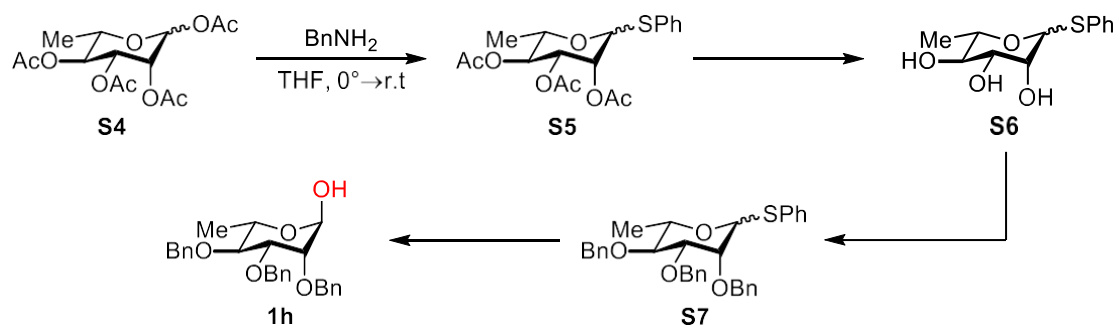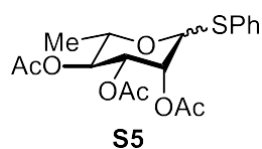

#### Phenyl 2,3,4-tri-*O*-acetyl-1-thio-*L*-rhamnopyranoside (S5)

In an oven dried round bottom flask, **S4** (3.0 mmol, 1.0 equiv.) and anhydrous DCM (5 mL) were added. After stirring until the mixture became homogeneous, PhSH (4.5 mmol, 1.5 equiv.) and BF<sub>3</sub>·OEt<sub>2</sub> (9.0 mmol, 3.0 equiv.) were added. The reaction mixture was stirred overnight and quenched with saturated NaHCO<sub>3</sub> solution (20 mL). The aqueous layer was extracted with DCM (3 x 35 mL) and dried with Na<sub>2</sub>SO<sub>4</sub>. The extracted organic layer was concentrated *in vacuo* and subjected to FCC (SiO<sub>2</sub>, 30% EtOAc in hexanes) to afford phenyl 2,3,4-tri-*O*-acetyl-1-thio-*L*-rhamnopyranoside **S5** as white solid.

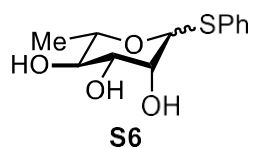

#### Phenyl 1-thio-*L*-rhamnopyranoside (S6)

In an oven dried round bottom flask, **S5** (3.0 mmol, 1 equiv.) and MeOH (20 mL) were added. After stirring until the mixture became homogeneous, a chip of sodium metal (0.3 mmol, 0.1 equiv.) was added and stirred at room temperature until all starting materials were consumed. Once all starting materials are gone, the reaction was neutralized with acetic acid and was concentrated *in vacuo* to yield phenyl 1-thio-*L*-rhamnopyranoside **S6** as white gum. The product was then subjected to next reaction without further purification.

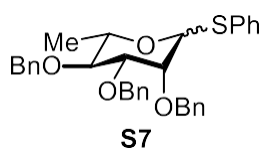

#### Phenyl 2,3,4-tri-*O*-(phenylmethyl)-1-thio-*L*-rhamnopyranoside (S7)

An oven dried and nitrogen filled round-bottom flask was charged with **S6** (3.0 mmol, 1.0 equiv.) and DMF (20 mL). After cooling down the reaction in an ice bath, NaH (18 mmol, 6.0 equiv.) was added portion wise. Once H<sub>2</sub> gas stops generating, BnBr (18 mmol, 6.0 equiv.) was added followed by TBAI (0.15 mmol, 0.05 equiv.). The reaction mixture was stirred at room temperature overnight and quenched by adding water. The mixture was extracted with EtOAc (3 x 60 mL), and the organic layer was dried with Na<sub>2</sub>SO<sub>4</sub> and concentrated *in vacuo*. The concentrated crude mixture was subjected to FCC (SiO<sub>2</sub>, 5% EtOAc in hexanes) to afford phenyl 2,3,4-tri-*O*-(phenylmethyl)-1-thio-*L*-rhamnopyranoside **S7** as yellowish oil.

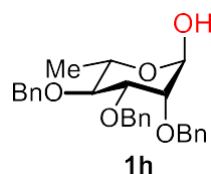

### 2,3,4-tri-*O*-(phenylmethyl)- $\alpha$ -*L*-rhamnopyranoside (**1h**)

In a clean round-bottom flask, **S7** (2.5 mmol, 1 equiv.) was dissolved with acetone/water mixture (9:1, 22.2 mL). After cooling down the mixture in an ice bath, NBS (5.0 mmol, 2.0 equiv.) was added. The reaction was stirred overnight while it was gradually warmed up to the room temperature. Water (20 mL) was added to quench the reaction followed by the extraction with EtOAc (3 x 70 mL). The combined organic layer was dried with Na<sub>2</sub>SO<sub>4</sub> and concentrated *in vacuo*. The concentrated crude mixture was subjected to FCC (SiO<sub>2</sub>, 30% EtOAc in hexanes) to afford 2,3,4-tri-*O*-(phenylmethyl)- $\alpha$ -*L*-rhamnopyranoside **1h** as white solid, which is confirmed by comparing with literature NMR spectra.<sup>6</sup>

<sup>6</sup>Zhang, J.; Fu, J.; Si, W.; Wang, X.; Wang, Z.; Tang, J. *Carbohydrate Research*. **2011**, 346, 2290-2293

## Preparation of 2,3,4-tris-*O*-(phenylmethyl)-*L*-fucopyranoside (**1i**)

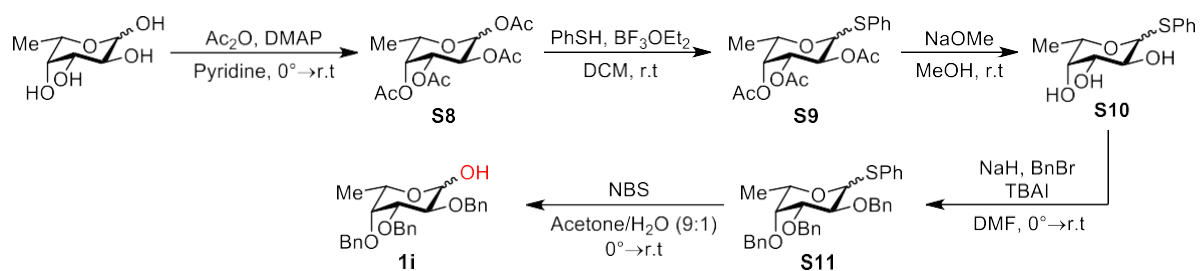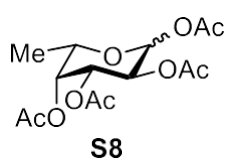

### 1,2,3,4-Tetra-*O*-acetyl-*L*-fucopyranoside (**S8**)

In an oven dried round bottom flask, *L*-fucose (3.05 mmol, 1.0 equiv.) and anhydrous pyridine (10 mL) were added. After stirring the mixture until it became homogeneous, the round bottom flask was placed in an ice bath and was cooled down to  $0^\circ\text{C}$ . Into the cooled down reaction, acetic anhydride (18.3 mmol, 6.0 equiv.) and DMAP (0.15 mmol, 0.05 equiv.) were added in that order. The reaction was slowly warmed up to room temperature with stirring until starting materials are gone. The mixture was then diluted with DCM (100 mL) and washed with 1N HCl solution (2 x 80 mL). The organic layer was washed with water (2 x 80 mL) and then saturated brine (2 x 80 mL). The extracted organic layer was dried with  $\text{Na}_2\text{SO}_4$  and concentrated *in vacuo*. The product 1,2,3,4-tetra-*O*-acetyl-*L*-fucopyranoside **S8** is subjected to the next synthesis without further purification.

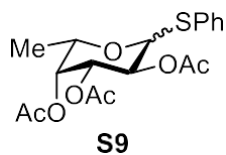

### Phenyl 2,3,4-tri-*O*-acetyl-1-thio-*L*-fucopyranoside (**S9**)

In an oven dried round bottom flask, **S8** (3.0 mmol, 1.0 equiv.) and anhydrous DCM (5 mL) were added. After stirring until the mixture became homogeneous, PhSH (4.5 mmol, 1.5 equiv.) and  $\text{BF}_3 \cdot \text{OEt}_2$  (9.0 mmol, 3.0 equiv.) were added. Then, the reaction mixture was stirred overnight and quenched with saturated  $\text{NaHCO}_3$  solution (20 mL). The aqueous layer was extracted with DCM (3 x 35 mL) and dried with  $\text{Na}_2\text{SO}_4$ . The extracted organic layer was concentrated *in vacuo* and subjected to FCC ( $\text{SiO}_2$ , 30% EtOAc in hexane  $\rightarrow$  50% EtOAc in hexane) to afford phenyl 2,3,4-tri-*O*-acetyl-1-thio-*L*-fucopyranoside **S9** as white solid.

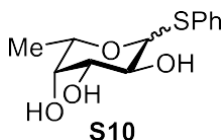

### Phenyl 1-thio-*L*-fucopyranoside (**S10**)

In an oven dried round bottom flask, **S9** (2.9 mmol, 1 equiv.) and MeOH (20 mL) were added. After stirring until the mixture became homogeneous, Na metal (0.29 mmol, 0.1 equiv.) was added and stirred at room temperature until all starting materials were consumed. Once all starting materials are gone, the reaction was neutralized with acetic acid and was concentrated *in vacuo* to afford phenyl 1-thio-*L*-fucopyranoside **S10** as yellowish gum. The product was then subjected to next reaction without further purification.

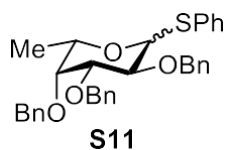

#### Phenyl 2,3,4-tri-*O*-(phenylmethyl)-1-thio-*L*-fucopyranoside (**S11**)

An oven dried and nitrogen filled round-bottom flask was charged with **S10** (3.0 mmol, 1.0 equiv.) and DMF (23 mL). After cooling down the reaction in an ice bath, NaH (18 mmol, 6.0 equiv.) was added portion wise. Once H<sub>2</sub> gas stops generating, BnBr (18 mmol, 6.0 equiv.) was added followed by TBAI (0.15 mmol, 0.05 equiv.). The reaction mixture was stirred at room temperature overnight and quenched by adding water. The mixture was extracted with EtOAc (3 x 100 mL), and the organic layer was dried with Na<sub>2</sub>SO<sub>4</sub> and concentrated *in vacuo*. The concentrated crude mixture was subjected to FCC (SiO<sub>2</sub>, 20% EtOAc in hexanes) to afford phenyl 2,3,4-tris-*O*-(phenylmethyl)-1-thio- *L*-fucopyranoside **S11** as yellowish oil.

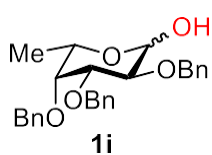

#### 2,3,4-Tris-*O*-(phenylmethyl)-*L*-fucopyranoside (**1i**)

In a clean round-bottom flask, **S11** (2.6 mmol, 1 equiv.) was dissolved with acetone/water mixture (9:1, 25 mL). After cooling down the mixture in an ice bath, NBS (5.2 mmol, 2 equiv.) was added. The reaction was stirred overnight while it was gradually warmed up to the room temperature. Water (20 mL) was added to quench the reaction followed by the extraction with EtOAc (3 x 100 mL). The combined organic layer was dried with Na<sub>2</sub>SO<sub>4</sub> and concentrated *in vacuo*. The concentrated crude mixture was subjected to FCC (SiO<sub>2</sub>, 30% EtOAc in hexanes) to afford **1i** as white solid, which is confirmed by comparing with literature NMR spectra.<sup>7</sup>

<sup>7</sup>Nishi, Y.; Tanimoto, T. *Biosci. Biotechnol. Biochem.* **2009**, 73 (3), 562–569

### Preparation of 2,3,4-tris-*O*-(phenylmethyl)-*D*-xylopyranoside (1j)

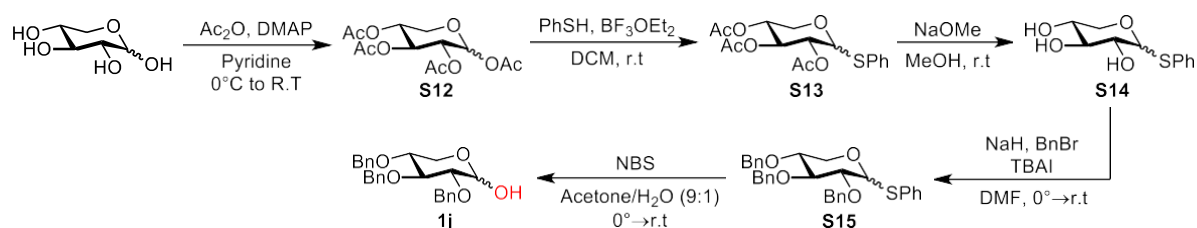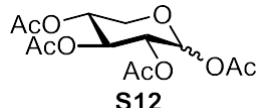

#### 1,2,3,4-Tetra-*O*-acetyl-*D*-xylopyranoside (S12)

In an oven dried round bottom flask, *D*-xylopyranose (13 mmol, 1.0 equiv.) and anhydrous pyridine (40 mL) were added. After stirring the mixture until it became homogeneous, the round bottom flask was placed in an ice bath and was cooled down to 0°C. Into the cooled down reaction, acetic anhydride (65 mmol, 5.0 equiv.) and DMAP (0.65 mmol, 0.05 equiv.) were added in that order. The reaction was slowly warmed up to room temperature with stirring until starting materials are gone. The mixture was then diluted with DCM (150 mL) and washed with 1N HCl solution (2 x 120 mL). The organic layer was washed with water (2 x 120 mL) and then saturated brine (2 x 120 mL). The extracted organic layer was dried with Na<sub>2</sub>SO<sub>4</sub> and concentrated *in vacuo*. The product 1,2,3,4-Tetra-*O*-acetyl-*D*-xylopyranoside **S12** is subjected to the next synthesis without further purification.

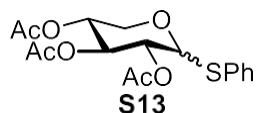

#### Phenyl 2,3,4-tri-*O*-acetyl-1-thio-*D*-xylopyranoside (S13)

In an oven dried round-bottom flask, **S12** (13 mmol, 1.0 equiv.) and DCM (15 mL) were added. After the addition of thiophenol (19.5 mmol, 1.5 equiv.), the round-bottom flask was sealed with a rubber-septum cap and purged with nitrogen gas. The reaction mixture was stirred until it became homogeneous, and then BF<sub>3</sub>·OEt<sub>2</sub> (33 mmol, 3.0 equiv.) was slowly injected into the flask. The reaction was stirred overnight at room temperature and quenched with saturated NaHCO<sub>3</sub> solution (50 mL). After extracting the mixture with DCM (3 x 70mL), the combined organic layer was dried with Na<sub>2</sub>SO<sub>4</sub> and concentrated *in vacuo*. The concentrated crude mixture was subjected to FCC (SiO<sub>2</sub>, 20% EtOAc in hexane) to afford phenyl 2,3,4-tri-*O*-acetyl-1-thio-*D*-xylopyranoside **S14** as yellowish oil.

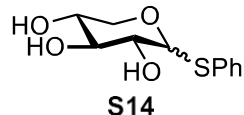

#### Phenyl 1-thio-*D*-xylopyranoside (S14)

A dry round-bottom flask was filled with **S14** (13 mmol, 1.0 equiv.) and anhydrous methanol (40 mL). After the reaction mixture became homogeneous, a chip of sodium metal (1.3 mmol, 0.1 equiv.) was added. The reaction was stirred overnight at room temperature, and then quenched by adding acetic acid until the pH of the reaction became neutral. The crude mixture was concentrated *in vacuo* to yield yellowish white solid. The product phenyl 1-thio-*D*-xylopyranoside **S14** was subjected to the next synthesis without further purification.

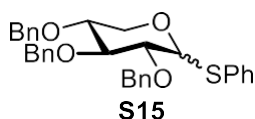

#### Phenyl 2,3,4-tris-*O*-(phenylmethyl)-1-thio-*D*-xylopyranoside (S15)

An oven dried and nitrogen filled round-bottom flask was charged with **S14** (13 mmol, 1.0 equiv.) and DMF (60 mL). After cooling down the reaction in an ice bath, NaH (78 mmol, 6.0 equiv.) was added portion wise. Once H<sub>2</sub> gas stops generating, BnBr (78 mmol, 6.0 equiv.) was added followed by TBAI (0.65 mmol, 0.05 equiv.). The reaction mixture was stirred at room temperature overnight and quenched by adding water. The mixture was extracted with EtOAc (3 x 100 mL), and the organic layer was dried with Na<sub>2</sub>SO<sub>4</sub> and concentrated *in vacuo*. The concentrated crude mixture was subjected to FCC (SiO<sub>2</sub>, 20% EtOAc in hexane) to afford phenyl 2,3,4-tris-*O*-(phenylmethyl)-1-thio-*D*-xylopyranoside **S15** as yellowish oil.

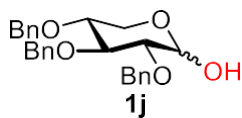

#### 2,3,4-tris-*O*-(phenylmethyl)-*D*-xylopyranoside (1j)

In a clean round-bottom flask, **S15** (13 mmol, 1 equiv.) was dissolved with acetone/water mixture (9:1, 50 mL). After cooling down the mixture in an ice bath, NBS (26 mmol, 2 equiv.) was added. The reaction was stirred overnight while it was gradually warmed up to the room temperature. Water (50 mL) was added to quench the reaction followed by the extraction with EtOAc (3 x 120 mL). The combined organic layer was dried with Na<sub>2</sub>SO<sub>4</sub> and concentrated *in vacuo*. The concentrated crude mixture was subjected to FCC (SiO<sub>2</sub>, 10% EtOAc in DCM) to afford 2,3,4-tris-*O*-(phenylmethyl)-*D*-xylopyranose **1j** as white solid, which is confirmed by comparing with literature NMR spectra.<sup>8</sup>

#### Preparation of 2,3,5-Tris-*O*-(phenylmethyl)-β-*D*-ribofuranose (1k)

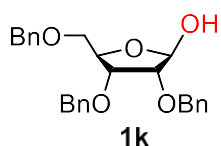

Purchased from Combi-Blocks. Batch#: A98634.

<sup>8</sup>Zhang, J.; Fu, J.; Si, W.; Wang, X.; Wang, Z.; Tang, J. *Carbohydrate Research*. **2011**, 346, 2290-2293

## Preparation of 2,3-bis-*O*-(phenylmethyl)-4,6-*O*-[(*R*)-phenylmethylene]- $\alpha$ -*D*-mannopyranoside (**11**)

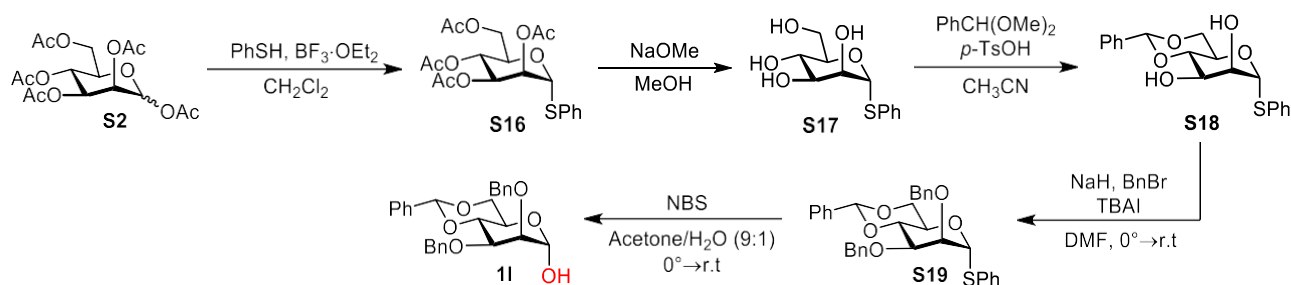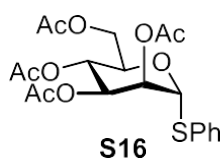

### Phenyl 2,3,4,6-tetra-*O*-acetyl-1-thio- $\alpha$ -*D*-mannopyranoside (**S16**)

In an oven dried round-bottom flask, **S2** (11 mmol, 1.0 equiv.) and DCM (15 mL) were added. After the addition of thiophenol (16.5 mmol, 1.5 equiv.), the round-bottom flask was sealed with a rubber-septum cap and purged with nitrogen gas. The reaction mixture was stirred until it became homogeneous, and then  $\text{BF}_3 \cdot \text{OEt}_2$  (33 mmol, 3.0 equiv.) was slowly injected into the flask. The reaction was stirred overnight at room temperature and quenched with aqueous  $\text{NaHCO}_3$  (saturated, 50 mL). After extracting the mixture with DCM (3 x 70 mL), the combined organic layer was dried with  $\text{Na}_2\text{SO}_4$  and concentrated *in vacuo*. The concentrated crude mixture was subjected to FCC ( $\text{SiO}_2$ , 20% EtOAc in hexanes  $\rightarrow$  40% EtOAc in hexanes) to afford phenyl 2,3,4,6-tetra-*O*-acetyl-1-thio-*D*-mannopyranoside **S16** as yellowish oil.

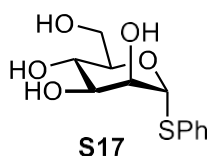

### Phenyl 1-thio- $\alpha$ -*D*-mannopyranoside (**S17**)

A dry round-bottom flask was filled with **S16** (9.5 mmol, 1.0 equiv.) and anhydrous methanol (40 mL). After the reaction mixture became homogeneous, a chip of sodium metal (0.95 mmol, 0.1 equiv.) was added. The reaction was stirred overnight at room temperature, and then quenched by adding acetic acid until the pH of the reaction became neutral. The crude mixture was concentrated *in vacuo* to yield yellowish white solid. The product was subjected to the next synthesis without further purification.

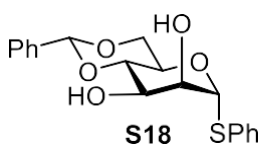

### Phenyl 4,6-*O*-[(*R*)-phenylmethylene]-1-thio- $\alpha$ -*D*-mannopyranoside (**S18**)

An oven dried and nitrogen filled round-bottom flask was charged with **S17** (4.5 mmol, 1.0 equiv.) and anhydrous acetonitrile (26 mL).  $\text{PhCH}(\text{OMe})_2$  (6.75 mmol, 1.5 equiv.) and *p*-TsOH (0.27 mmol, 0.06 equiv.) were added and the mixture was refluxed for 3 hours. Once all starting materials are consumed, the reaction was quenched with  $\text{Et}_3\text{N}$  (3 mL), diluted with EtOAc (50 mL), and then washed with brine. Collected organic layer was dried with  $\text{Na}_2\text{SO}_4$  and concentrated *in vacuo*. The concentrated crude mixture was subjected to FCC ( $\text{SiO}_2$ , 5% EtOAc in hexanes) to afford phenyl 4,6-*O*-[(*R*)-phenylmethylene]-1-thio- $\alpha$ -*D*-mannopyranoside **S18** as white solid.

**Phenyl 2,3-bis-*O*-(phenylmethyl)-4,6-*O*-[(*R*)-phenylmethylene]-1-thio- $\alpha$ -*D*-mannopyranoside (**S19**)**

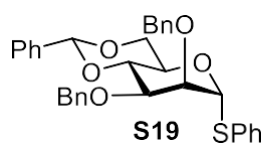

An oven dried and nitrogen filled round-bottom flask was charged with **S18** (3.0 mmol, 1.0 equiv.) and DMF (20 mL). After cooling down the reaction in an ice bath, NaH (18 mmol, 6.0 equiv.) was added portion wise. Once H<sub>2</sub> gas stops generating, BnBr (12 mmol, 4 equiv.) was added followed by TBAI (0.15 mmol, 0.05 equiv.). The reaction mixture was stirred at room temperature overnight and quenched by adding water. The mixture was extracted with EtOAc (3 x 60 mL), and the organic layer was dried with Na<sub>2</sub>SO<sub>4</sub> and concentrated *in vacuo*.

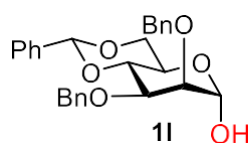

**2,3-Bis-*O*-(phenylmethyl)-4,6-*O*-[(*R*)-phenylmethylene]- $\alpha$ -*D*-mannopyranoside (**11**)**

In a clean round-bottom flask, **S19** (3.0 mmol, 1.0 equiv.) was dissolved with acetone/water mixture (9:1, 22.2 mL). After cooling down the mixture in an ice bath, NBS (6.3 mmol, 2.1 equiv.) was added. The reaction was stirred overnight while it was gradually warmed up to the room temperature. Water (20 mL) was added to quench the reaction followed by the extraction with EtOAc (3 x 60 mL). The combined organic layer was dried with Na<sub>2</sub>SO<sub>4</sub> and concentrated *in vacuo*. The concentrated crude mixture was subjected to FCC (SiO<sub>2</sub>, 40% EtOAc in hexanes) to afford 2,3-bis-*O*-(phenylmethyl)-4,6-*O*-[(*R*)-phenylmethylene]- $\alpha$ -*D*-mannopyranoside **11** as white solid, which is confirmed by comparing with literature NMR spectra.<sup>9</sup>

<sup>9</sup>Codée, J. D. C.; Hossain, L. H.; Seeberger, P. H. *Org. Lett.* **2005**, 7, 15, 3251–3254

### Preparation of 2,3,4,6-tetrakis-*O*-[(4-methoxyphenyl)methyl]- $\alpha$ -*D*-mannopyranoside (**1m**)

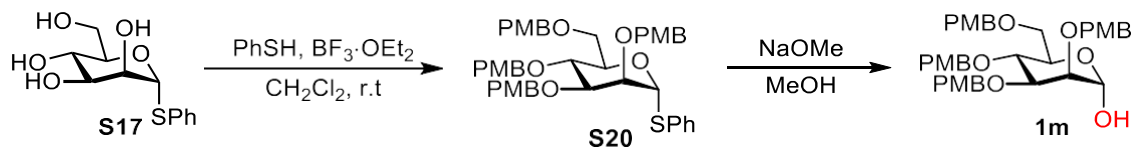

### Phenyl 2,3,4,6-tetrakis-*O*-[(4-methoxyphenyl)methyl]-1-thio- $\alpha$ -*D*-mannopyranoside (**S20**)

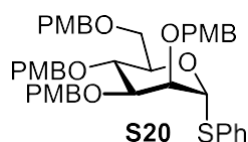

An oven dried and nitrogen filled round-bottom flask was charged with **S17** (9.5 mmol, 1.0 equiv.) and DMF (50 mL). After cooling down the reaction in an ice bath, NaH (52 mmol, 5.5 equiv.) was added portion wise. Once H<sub>2</sub> gas stops generating, PMBBBr (47.5 mmol, 5.0 equiv.) was added followed by TBAI (0.95 mmol, 0.1 equiv.). The reaction mixture was stirred at room temperature overnight and quenched by adding water. The mixture was extracted with EtOAc (3 x 100 mL), and the organic layer was dried with Na<sub>2</sub>SO<sub>4</sub> and concentrated *in vacuo*. The concentrated crude mixture was subjected to FCC (SiO<sub>2</sub>, hexanes → 40% EtOAc in hexanes) to afford phenyl 2,3,4,6-tetrakis-*O*-[(4-methoxyphenyl)methyl]-1-thio- $\alpha$ -*D*-mannopyranoside **S20**.

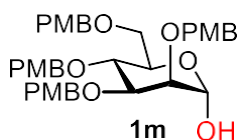

### 2,3,4,6-Tetrakis-*O*-[(4-methoxyphenyl)methyl]- $\alpha$ -*D*-mannopyranoside (**1m**)

In a clean round-bottom flask, **S20** (9.5 mmol, 1.0 equiv.) was dissolved with acetone/water mixture (9:1, 55.5 mL). After cooling down the mixture in an ice bath, NBS (20 mmol, 2.1 equiv.) was added. The reaction was stirred overnight while it was gradually warmed up to the room temperature. Water (50 mL) was added to quench the reaction followed by the extraction with EtOAc (3 x 120 mL). The combined organic layer was dried with Na<sub>2</sub>SO<sub>4</sub> and concentrated *in vacuo*. The concentrated crude mixture was subjected to FCC (SiO<sub>2</sub>, 50% EtOAc in hexanes → 70% EtOAc in hexanes) to afford 2,3,4,6-Tetrakis-*O*-[(4-methoxyphenyl)methyl]- $\alpha$ -*D*-mannopyranoside **1m** as white solid. **<sup>1</sup>H NMR** (700 MHz, CDCl<sub>3</sub>)  $\delta$  7.27 (d, *J* = 10.2 Hz, 6H), 7.06 (dd, *J* = 8.7, 2.6 Hz, 2H), 6.90 – 6.78 (m, 8H), 5.21 (d, *J* = 1.9 Hz, 1H), 4.77 (d, *J* = 10.4 Hz, 1H), 4.66 (d, *J* = 20.2 Hz, 2H), 4.55 (d, *J* = 3.8 Hz, 2H), 4.52 (d, *J* = 11.9 Hz, 1H), 4.48 (d, *J* = 11.9 Hz, 1H), 4.39 (d, *J* = 10.5 Hz, 1H), 3.96 (ddd, *J* = 8.9, 6.3, 2.0 Hz, 1H), 3.90 (dd, *J* = 9.5, 3.0 Hz, 1H), 3.81 (s, 3H), 3.80 (s, 3H), 3.79 (s, 3H), 3.79 (s, 3H), 3.76 (t, *J* = 2.5 Hz, 1H), 3.68 – 3.66 (m, 1H), 3.65 (d, *J* = 1.9 Hz, 1H), 3.62 (dd, *J* = 10.5, 6.4 Hz, 1H); **<sup>13</sup>C NMR** (176 MHz, CDCl<sub>3</sub>)  $\delta$  159.1, 159.1, 159.1, 159.1, 130.7, 130.6, 130.4, 130.1, 129.8, 129.7, 129.6, 129.6, 129.6, 129.5, 129.2, 129.2, 113.7, 113.7, 113.7, 113.6, 92.7, 79.4, 74.9, 74.6, 74.3, 72.8, 72.2, 71.8, 71.4, 69.1, 55.2, 55.2; **HRMS (ESI-TOF)** (*m/z*): [M+Na]<sup>+</sup> calcd for C<sub>38</sub>H<sub>44</sub>NaO<sub>10</sub> 683.2832, found 683.2810

### Preparation of 2,3,4,6-tetrakis-*O*-[(4-methoxyphenyl)methyl]-*D*-galactopyranose (**1n**)

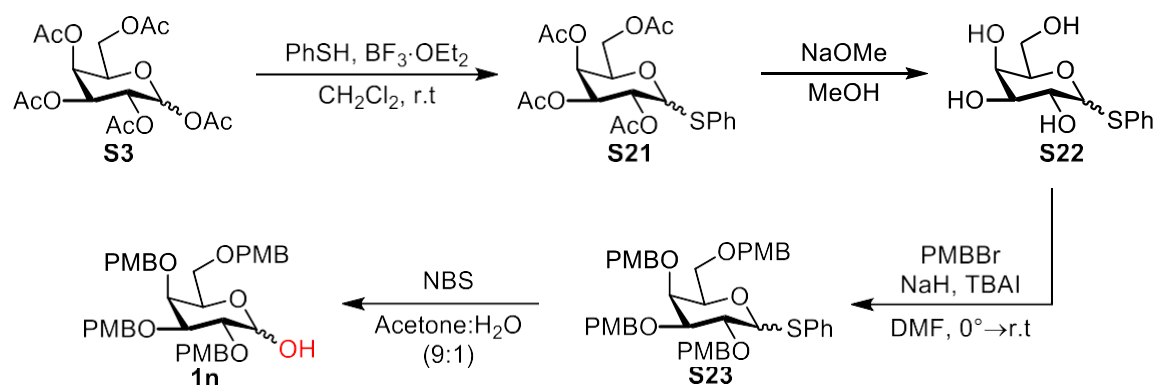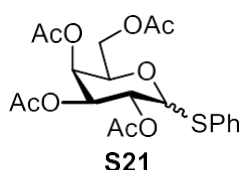

#### Phenyl 2,3,4,6-tetra-*O*-acetyl-1-thio-*D*-galactopyranoside (**S21**)

In an oven dried round-bottom flask, **S3** (11 mmol, 1.0 equiv.) and DCM (15 mL) were added. After the addition of thiophenol (16.5 mmol, 1.5 equiv.), the round-bottom flask was sealed with a rubber-septum cap and purged with nitrogen gas. The reaction mixture was stirred until it became homogeneous, and then  $\text{BF}_3 \cdot \text{OEt}_2$  (33 mmol, 3.0 equiv.) was slowly injected into the flask. The reaction was stirred overnight at room temperature and quenched with saturated  $\text{NaHCO}_3$  solution (50 mL). After extracting the mixture with DCM (3 x 70 mL), the combined organic layer was dried with  $\text{Na}_2\text{SO}_4$  and concentrated *in vacuo*. The concentrated crude mixture was subjected to FCC ( $\text{SiO}_2$ , 20% EtOAc in hexanes  $\rightarrow$  40% EtOAc in hexanes) to afford phenyl 2,3,4,6-tetra-*O*-acetyl-1-thio-*D*-galactopyranoside **S21** as product.  $^1\text{H}$  NMR (500 MHz,  $\text{CDCl}_3$ )  $\delta$  7.54 – 7.49 (m, 2H), 7.34 – 7.30 (m, 3H), 5.42 (dd,  $J$  = 3.4, 1.1 Hz, 1H), 5.24 (t,  $J$  = 10.0 Hz, 1H), 5.05 (dd,  $J$  = 9.9, 3.3 Hz, 1H), 4.72 (d,  $J$  = 10.0 Hz, 1H), 4.19 (dd,  $J$  = 11.3, 7.0 Hz, 1H), 4.12 (dd,  $J$  = 11.4, 6.3 Hz, 2H), 3.96 – 3.92 (m, 1H), 2.12 (s, 3H), 2.10 (s, 3H), 2.04 (s, 3H), 1.98 (s, 3H).

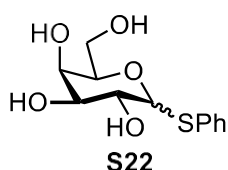

#### Phenyl 1-thio-*D*-galactopyranoside (**S22**)

A dry round-bottom flask was filled with **S21** (11 mmol, 1.0 equiv.) and dry methanol (45 mL). After the reaction mixture became homogeneous, a chip of sodium metal (1.1 mmol, 0.1 equiv.) was added. The reaction was stirred overnight at room temperature, and then quenched by adding acetic acid until the pH of the reaction became neutral. The crude mixture was concentrated *in vacuo* to yield yellowish white solid. The product was subjected to the subsequent reaction without further purification.

### Phenyl 2,3,4,6-tetrakis-*O*-[(4-methoxyphenyl)methyl]-1-thio-*D*-galactopyranoside (**S23**)

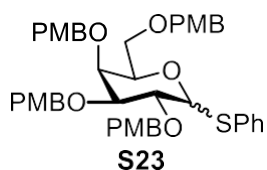

An oven dried and nitrogen filled round-bottom flask was charged with **S22** (11 mmol, 1.0 equiv.) and DMF (60 mL). After cooling down the reaction in an ice bath, NaH (88 mmol, 8.0 equiv.) was added portion wise. Once H<sub>2</sub> gas stops generating, PMBBr (88 mmol, 8.0 equiv.) was added followed by TBAI (1.1 mmol, 0.1 equiv.). The reaction mixture was stirred at room temperature overnight and quenched by adding water. The mixture was extracted with EtOAc (3 x 100 mL), and the organic layer was dried with Na<sub>2</sub>SO<sub>4</sub> and concentrated *in vacuo*. The concentrated crude mixture was subjected to FCC (SiO<sub>2</sub>, 20% EtOAc in hexanes → 30% EtOAc in hexanes) to afford phenyl 2,3,4,6-tetrakis-*O*-[(4-methoxyphenyl)methyl]-1-thio-*D*-galactopyranoside **S23** as yellowish gum.

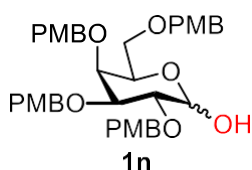

### 2,3,4,6-tetrakis-*O*-[(4-methoxyphenyl)methyl]-*D*-galactopyranoside (**1n**)

In a clean round-bottom flask, **S23** (10 mmol, 1.0 equiv.) was dissolved with acetone/water mixture (9:1, 55.5 mL). After cooling down the mixture in an ice bath, NBS (21 mmol, 2.1 equiv.) was added. The reaction was stirred overnight while it was gradually warmed up to the room temperature. Water (50 mL) was added to quench the reaction followed by the extraction with EtOAc (3 x 120 mL). The combined organic layer was dried with Na<sub>2</sub>SO<sub>4</sub> and concentrated *in vacuo*. The concentrated crude mixture was subjected to FCC (SiO<sub>2</sub>, 30% EtOAc in hexanes → 40% EtOAc in hexanes) to afford 2,3,4,6-tetrakis-*O*-[(4-methoxyphenyl)methyl]-*D*-galactopyranoside **1n** as white solid product, which is confirmed by comparing with literature NMR spectra.<sup>10</sup>

<sup>10</sup>Whalen, L. J.; Halcomb, R. L. *Org. Lett.* **2004**, 6, 19, 3221-3224

**Preparation of 2,3,6-tris-*O*-(phenylmethyl)-4-*O*-[2,3,4,6-tetrakis-*O*-(phenylmethyl)- $\beta$ -*D*-glucopyranosyl]-*D*-glucopyranoside (**1o**)**

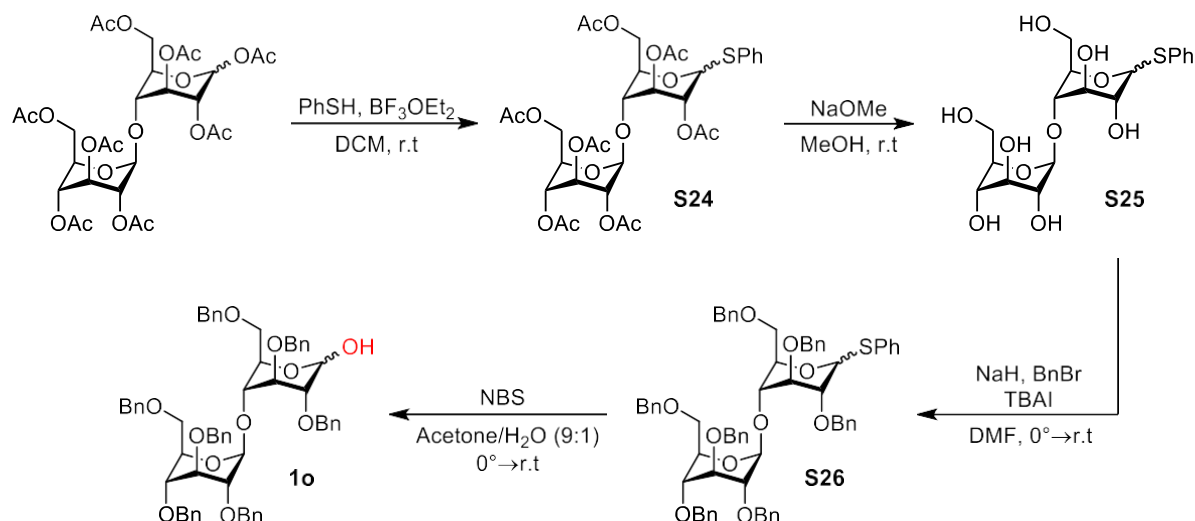

**Phenyl 4-*O*-(2,3,4,6-tetra-*O*-acetyl- $\beta$ -*D*-glucopyranosyl)-1-thio-*D*-glucopyranoside 2,3,6-triacetate (**S24**)**

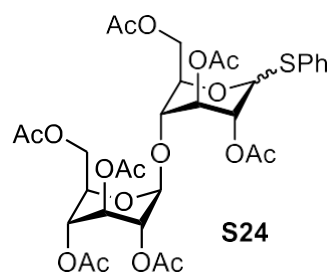

In an oven dried round-bottom flask,  $\alpha$ -*D*-cellobiose octaacetate (3.0 mmol, 1.0 equiv.) and DCM (10 mL) were added. After the addition of thiophenol (4.5 mmol, 1.5 equiv.), the round-bottom flask was sealed with a rubber-septum cap and purged with nitrogen gas. The reaction mixture was stirred until it became homogeneous, and then  $\text{BF}_3 \cdot \text{OEt}_2$  (9.0 mmol, 3.0 equiv.) was slowly injected into the flask. The reaction was stirred overnight at room temperature and quenched with saturated  $\text{NaHCO}_3$  solution (10 mL). After extracting the mixture with

DCM (3 x 70mL), the combined organic layer was dried with  $\text{Na}_2\text{SO}_4$  and concentrated *in vacuo*. The concentrated crude mixture was subjected to FCC ( $\text{SiO}_2$ , 50% EtOAc in hexanes) to afford phenyl 4-*O*-(2,3,4,6-tetra-*O*-acetyl- $\beta$ -*D*-glucopyranosyl)-1-thio-*D*-glucopyranoside 2,3,6-triacetate **S24** as fluffy white solid.

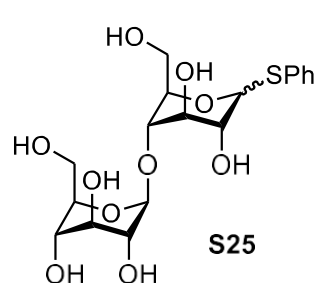

**Phenyl 4-*O*- $\beta$ -*D*-glucopyranosyl-1-thio-*D*-glucopyranoside (**S25**)**

A dry round-bottom flask was filled with **S24** (3.0 mmol, 1.0 equiv.) and dry methanol (20 mL). After the reaction mixture became homogeneous, a chip of sodium metal (0.3 mmol, 0.1 equiv.) was added. The reaction was stirred overnight at room temperature, and then quenched by adding acetic acid until the pH of the reaction became neutral. The crude mixture was concentrated *in vacuo* to yield **S25** as yellowish white solid. The product was subjected to the subsequent

reaction without further purification.

**Phenyl 2,3,6-tris-*O*-(phenylmethyl)-4-*O*-[2,3,4,6-tetrakis-*O*-(phenylmethyl)- $\beta$ -*D*-glucopyranosyl]-1-thio-*D*-glucopyranoside (**S26**)**

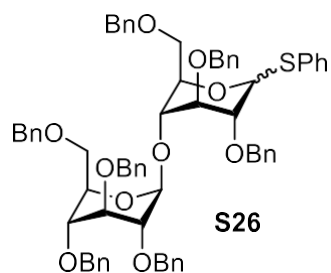

An oven dried and nitrogen filled round-bottom flask was charged with **S25** (3.0 mmol, 1.0 equiv.) and DMF (30 mL). After cooling down the reaction in an ice bath, NaH (48 mmol, 16 equiv.) was added portion wise. Once H<sub>2</sub> gas stops generating, BnBr (42 mmol, 14 equiv.) was added followed by TBAI (0.15 mmol, 0.05 equiv.). The reaction mixture was stirred at room temperature overnight and quenched by adding water. The mixture was extracted with EtOAc (3 x 80 mL), and the organic layer was dried with Na<sub>2</sub>SO<sub>4</sub> and concentrated *in vacuo*. The concentrated crude mixture was subjected to FCC (SiO<sub>2</sub>, hexanes → 20% EtOAc in hexanes) to afford phenyl 2,3,6-tris-*O*-(phenylmethyl)-4-*O*-[2,3,4,6-tetrakis-*O*-(phenylmethyl)- $\beta$ -*D*-glucopyranosyl]-1-thio-*D*-glucopyranoside **S26** as yellowish white solid.

**2,3,6-Tris-*O*-(phenylmethyl)-4-*O*-[2,3,4,6-tetrakis-*O*-(phenylmethyl)- $\beta$ -*D*-glucopyranosyl]-*D*-glucopyranoside (**1o**)**

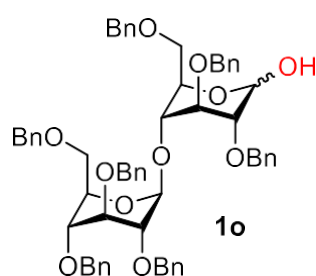

In a clean round-bottom flask, **S26** (2.0 mmol, 1.0 equiv.) was dissolved with acetone/water mixture (9:1, 22 mL). After cooling down the mixture in an ice bath, NBS (4.2 mmol, 2.1 equiv.) was added. The reaction was stirred overnight while it was gradually warmed up to the room temperature. Water (20 mL) was added to quench the reaction followed by the extraction with EtOAc (3 x 70 mL). The combined organic layer was dried with Na<sub>2</sub>SO<sub>4</sub> and concentrated *in vacuo*. The concentrated crude mixture was subjected to FCC (SiO<sub>2</sub>, 30% EtOAc in hexanes) to afford 2,3,6-tris-*O*-(phenylmethyl)-4-*O*-[2,3,4,6-tetrakis-*O*-(phenylmethyl)- $\beta$ -*D*-glucopyranosyl]-*D*-glucopyranoside **1o** as white solid, which is confirmed by comparing with literature NMR spectra.<sup>11</sup>

<sup>11</sup>Liu, B.; Mechelen, J.; Berg, R.; Nieuwendijk, A.; Aerts, J.; Marel, G.; Codée, J. Overkleeft, H. S. *Eur. J. Org. Chem.* **2019**, 118–129

### Preparation of 2,3,4,6-tetrakis-*O*-[(4-methoxyphenyl)methyl]- $\alpha$ -*D*-glucopyranoside (1p)

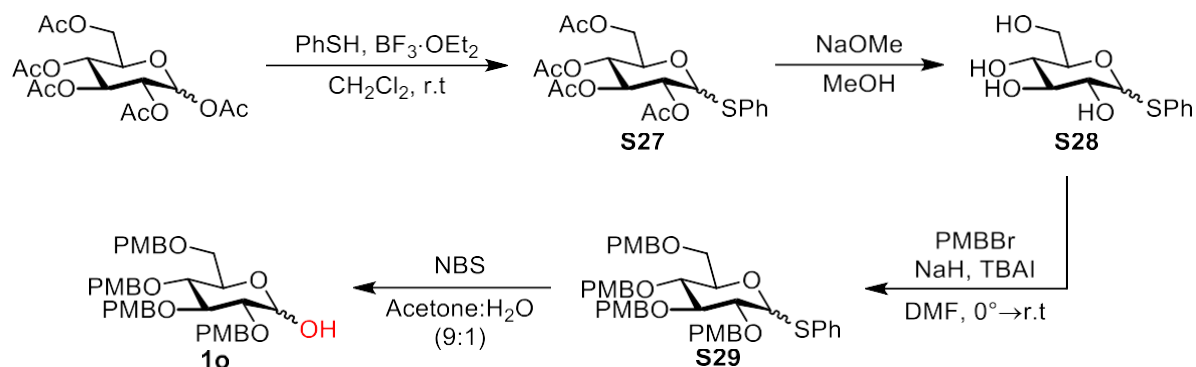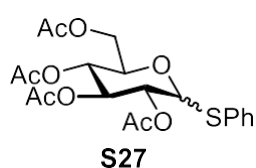

#### Phenyl 2,3,4,6-tetra-*O*-acetyl-1-thio-*D*-glucopyranoside (S27)

In an oven dried round-bottom flask, 1,2,3,4,6-penta-*O*-acetyl-*D*-glucopyranoside (5.0 mmol, 1.0 equiv.) and DCM (5 mL) were added. After the addition of thiophenol (7.5 mmol, 1.5 equiv.), the round-bottom flask was sealed with a rubber-septum cap and purged with nitrogen gas. The reaction mixture was stirred until it became homogeneous, and then  $\text{BF}_3\cdot\text{OEt}_2$  (15 mmol, 3.0 equiv.) was slowly injected into the flask. The reaction was stirred overnight at room temperature and quenched with saturated  $\text{NaHCO}_3$  solution (10 mL). After extracting the mixture with DCM (3 x 50mL), the combined organic layer was dried with  $\text{Na}_2\text{SO}_4$  and concentrated *in vacuo*. The concentrated crude mixture was subjected to FCC ( $\text{SiO}_2$ , pure hexane  $\rightarrow$  30% EtOAc in hexanes) to afford phenyl 2,3,4,6-tetra-*O*-acetyl-1-thio-*D*-glucopyranoside S27 as white solid.

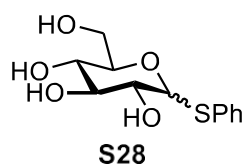

#### Phenyl 1-thio-*D*-glucopyranoside (S28)

A dry round-bottom flask was filled with S27 (5.0 mmol, 1.0 equiv.) and dry methanol (30 mL). After the reaction mixture became homogeneous, a chip of sodium metal (0.5 mmol, 0.1 equiv.) was added. The reaction was stirred overnight at room temperature, and then quenched by adding acetic acid until the pH of the reaction became neutral. The crude mixture was concentrated *in vacuo* to yield S28 as yellowish white solid. The product was subjected to the subsequent reaction without further purification.

### Phenyl 2,3,4,6-tetrakis-*O*-[(4-methoxyphenyl)methyl]-1-thio-*D*-glucopyranoside (**S29**)

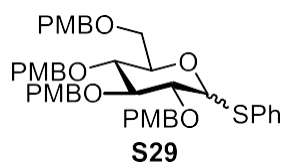

An oven dried and nitrogen filled round-bottom flask was charged with **S28** (5.0 mmol, 1.0 equiv.) and DMF (30 mL). After cooling down the reaction in an ice bath, NaH (25 mmol, 5.0 equiv.) was added portion wise. Once H<sub>2</sub> gas stops generating, PMBBBr (25 mmol, 5.0 equiv.) was added followed by TBAI (0.5 mmol, 0.1 equiv.).

The reaction mixture was stirred at room temperature overnight and quenched by adding water. The mixture was extracted with EtOAc (3 x 100 mL), and the organic layer was dried with Na<sub>2</sub>SO<sub>4</sub> and concentrated *in vacuo*. The concentrated crude mixture was subjected to FCC (SiO<sub>2</sub>, 40% EtOAc in hexanes) to afford phenyl 2,3,4,6-tetrakis-*O*-[(4-methoxyphenyl)methyl]-1-thio-*D*-glucopyranoside **S29** as yellowish white gum.

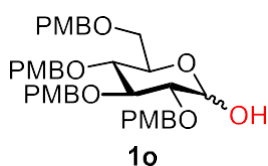

### 2,3,4,6-Tetrakis-*O*-[(4-methoxyphenyl)methyl]- $\alpha$ -*D*-glucopyranoside (**1o**)

In a clean round-bottom flask, **S26** (5.0 mmol, 1.0 equiv.) was dissolved with acetone/water mixture (9:1, 33.3 mL). After cooling down the mixture in an ice bath, NBS (10 mmol, 2.0 equiv.) was added. The reaction was stirred overnight while it was

gradually warmed up to the room temperature. Water (35 mL) was added to quench the reaction followed by the extraction with EtOAc (3 x 100 mL). The combined organic layer was dried with Na<sub>2</sub>SO<sub>4</sub> and concentrated *in vacuo*. The concentrated crude mixture was subjected to FCC (SiO<sub>2</sub>, 40% EtOAc in hexanes) to afford 2,3,4,6-tetrakis-*O*-[(4-methoxyphenyl)methyl]- $\alpha$ -*D*-glucopyranoside **1o** as white solid, the structure of which was confirmed by the comparison with the reported in literature NMR spectra.<sup>12</sup>

<sup>12</sup>Lucchetti, N.; Gilmour, R. *Chem. Eur. J.* **2018**, 24,16266 –16270

### c. Synthesis of Glycosyl Fluorides

**General Procedure:** An oven-dried 1 dram vial was charged with the sugar substrate (0.1 mmol, 1 equiv.) and 4,4'-dimethoxybenzophenone (0.02 mmol, 0.2 equiv.). The vial containing the mixture was sealed with PTFE/Silicone septum cap and was further dried under high vacuum for 5 minutes. Into the sealed vial, DCE (3 mL) and DIPEA (1 mmol, 10 equiv.) were added, and the vial was sonicated until the mixture became homogeneous. The mixture was sparged with a balloon containing SF<sub>6</sub> gas for 30 seconds. After the sparging was done, the outlet needle was removed followed by transfer of the reaction mixture into a 60 mL plastic syringe containing a stir bar. The syringe containing the mixture was placed on UV-A Flood Light lamp (distance between the lamp and the syringe = 1cm) and the reaction was stirred for 20 h, and then stopped by turning off the UV-A lamp.

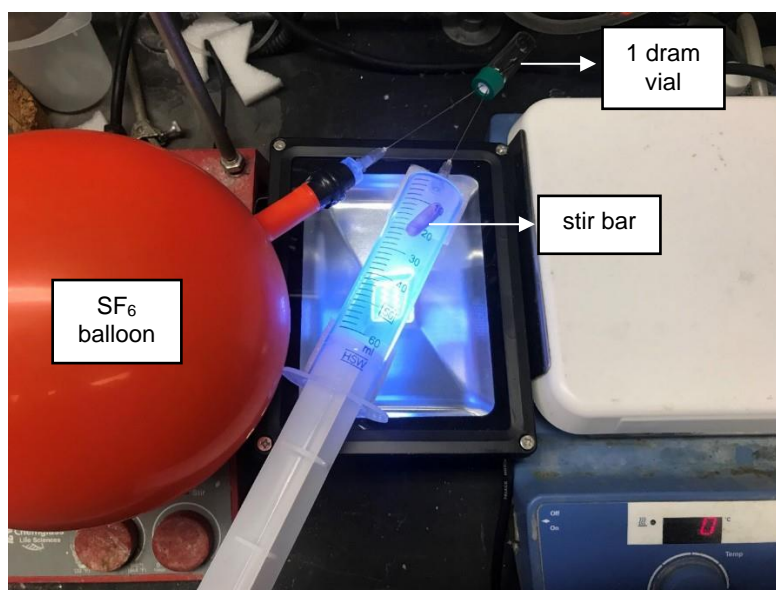

The resultant reaction mixture was diluted with 30 mL of DCM, and then washed with 1N HCl (20 mL x 3), NaHCO<sub>3</sub> (20 mL), water (20 mL), and brine (25 mL). The extracted organic layer was dried with Na<sub>2</sub>SO<sub>4</sub> and concentrated *in vacuo* to give red-brown oil, which was subjected to FCC (SiO<sub>2</sub>) to afford a pure product.

**Procedure for acetylated glycosides:** Similar to the general procedure except 0.03 mmol (0.3 equiv.) of 4,4'-dimethoxybenzophenone was used instead of 0.02 mmol (0.2 equiv.). For the substrates **1b** and **1c**, two UV-A lamps were used instead of one.

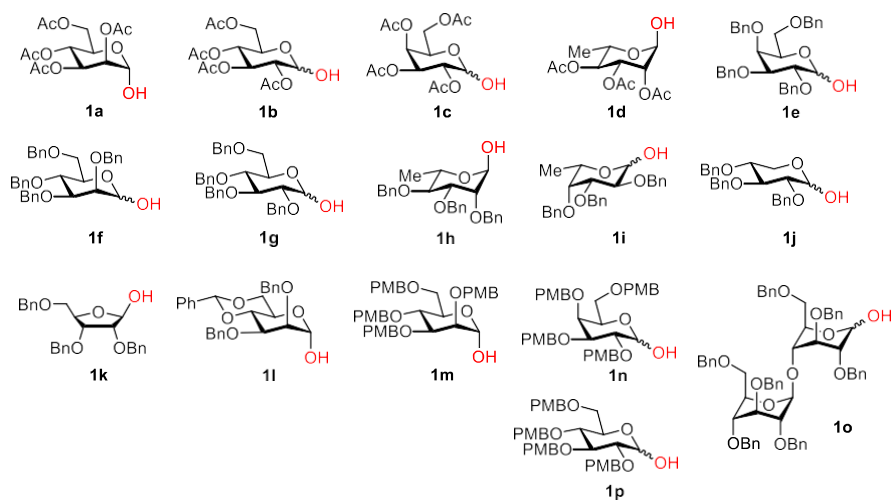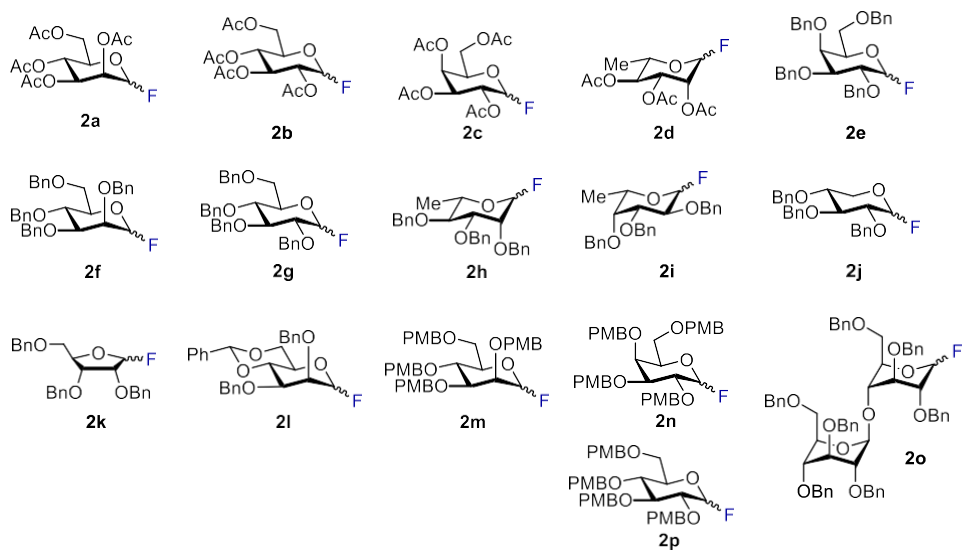

**Table SI-5.** Initial and final *a:b* ratios of the starting materials **1** used in the reactions and products **2**

| Substrate | Initial dr ( <i>a:b</i> ratio) of the starting substrate <b>1</b><br>determined by <sup>1</sup> H NMR | Product fluoride ( <b>2</b> ) dr ( <i>a:b</i> ratio)<br>Determined by <sup>19</sup> F NMR |
|-----------|-------------------------------------------------------------------------------------------------------|-------------------------------------------------------------------------------------------|
| <b>1a</b> | alpha only                                                                                            | 13:1                                                                                      |
| <b>1b</b> | 5:1                                                                                                   | 1:4.8                                                                                     |
| <b>1c</b> | 4.2:1                                                                                                 | 1:3.1                                                                                     |
| <b>1d</b> | alpha only                                                                                            | 6.7:1                                                                                     |
| <b>1e</b> | 1.4:1                                                                                                 | 1:2.9                                                                                     |
| <b>1f</b> | 2.5:1                                                                                                 | 19:1                                                                                      |
| <b>1g</b> | 4.75:1                                                                                                | 1:3.7                                                                                     |
| <b>1h</b> | alpha only                                                                                            | 5:1                                                                                       |
| <b>1i</b> | 2.7:1                                                                                                 | 1:3.6                                                                                     |
| <b>1j</b> | 5.5:1                                                                                                 | 1:4.3                                                                                     |
| <b>1k</b> | beta only                                                                                             | 1:13                                                                                      |
| <b>1l</b> | alpha only                                                                                            | 7.8:1                                                                                     |
| <b>1m</b> | alpha only                                                                                            | 36:1                                                                                      |
| <b>1n</b> | 3.35:1                                                                                                | 1:2.4                                                                                     |
| <b>1o</b> | 1.86:1                                                                                                | 1:3.4                                                                                     |
| <b>1p</b> | 3:1                                                                                                   | 1.3.7                                                                                     |

**Table SI-6.** Summary of the previous methods for the synthesis of glycosyl fluoride products **2**

| product   | method                                     | yield  | d.r. ( <i>a:b</i> ) | link to the paper    |
|-----------|--------------------------------------------|--------|---------------------|----------------------|
| <b>2a</b> | Xtalfluor-E, DCE, reflux                   | 94%    | alpha only          | <a href="#">Link</a> |
| <b>2b</b> | DAST, DCM, microreactor                    | 89%    | 5:4                 | <a href="#">Link</a> |
| <b>2c</b> | DAST, DCE, 70°C                            | 38%    | 1:2.4               | <a href="#">Link</a> |
|           | DAST, DMTST, DCM, 25°C                     | 100%   | 1:9.1               |                      |
| <b>2d</b> | AgF. I <sub>2</sub>                        | 80%    | alpha only          | <a href="#">Link</a> |
| <b>2e</b> | DAST (1.2 eq.), THF, -30°C, N <sub>2</sub> | 91%    | 3:5                 | <a href="#">Link</a> |
| <b>2f</b> | DAST (1.2 eq.), THF, -30°C, N <sub>2</sub> | 91%    | alpha only          | <a href="#">Link</a> |
| <b>2g</b> | DAST, DCM, microreactor                    | 100%   | 1:4                 | <a href="#">Link</a> |
| <b>2h</b> | –                                          | –      | –                   | –                    |
| <b>2i</b> | DAST, NBS, DCM, -15°C                      | 98%    | 1:2                 | <a href="#">Link</a> |
| <b>2j</b> | HF, DCM, -70°C                             | ~ 100% | alpha only          | <a href="#">Link</a> |
| <b>2k</b> | DAST (1.2 eq.), THF, -30°C, N <sub>2</sub> | 90%    | 10:1                | <a href="#">Link</a> |
| <b>2l</b> | DAST, -78°C to 0°C, 2h                     | 91%    | beta only           | <a href="#">Link</a> |
| <b>2m</b> | –                                          | –      | –                   | –                    |
| <b>2n</b> | NBS, DAST                                  | 93%    | not provided        | <a href="#">Link</a> |
| <b>2o</b> | –                                          | –      | –                   | –                    |
| <b>2p</b> | –                                          | –      | –                   | –                    |

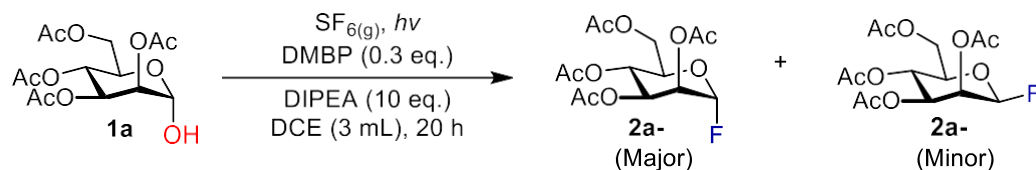

### Synthesis of 2,3,4,6-Tetra-*O*-acetyl-*D*-mannopyranosyl fluoride (**2a**)

The product was synthesized employing a procedure for acetylated glycosides. After a work-up, the reaction mixture was subjected to FCC (SiO<sub>2</sub>, pure hexanes → 40% EtOAc in hexane) to afford pure **2a** (25.1 mg,  $\alpha : \beta = 13 : 1$ ) in 72% yield as yellow oil. Stereochemistry of the products was confirmed by comparing with previously reported NMR spectra.<sup>13</sup>

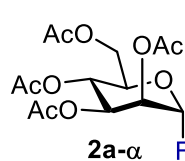

#### 2,3,4,6-Tetra-*O*-acetyl- $\alpha$ -*D*-mannopyranosyl fluoride (Major product).

**<sup>1</sup>H NMR** (700 MHz, CDCl<sub>3</sub>)  $\delta$  5.58 (d,  $J = 48.6$  Hz, 1H), 5.40 (s, 1H), 5.35 (d,  $J = 5.0$  Hz, 2H), 4.32 – 4.27 (m, 1H), 4.16 (dd,  $J = 14.7, 4.4$  Hz, 2H), 2.17 (s, 3H), 2.11 (s, 3H), 2.06 (s, 3H), 2.01 (s, 3H); **<sup>13</sup>C NMR** (176 MHz, CDCl<sub>3</sub>)  $\delta$  170.5, 169.7, 169.6, 169.5, 104.7 (d,  $^1J_{C-F} = 223.7$  Hz,  $\beta$ -C<sub>1</sub>), 70.9 (d,  $^3J_{C-F} = 2.7$  Hz), 68.2, 67.7 (d,  $^2J_{C-F} = 39.5$  Hz), 65.0, 61.8, 20.7, 20.6, 20.6; **<sup>19</sup>F NMR** (471 MHz, CDCl<sub>3</sub>)  $\delta$  -138.36 (d,  $J = 48.4$  Hz); **IR** (thin film, cm<sup>-1</sup>): 2960, 1742, 1434, 1368, 1211, 1172, 1087, 1051, 1019, 974, 916, 795, 685; **HRMS (ESI-TOF)** ( $m/z$ ): [ $M+Na$ ]<sup>+</sup> calcd for C<sub>14</sub>H<sub>19</sub>FNao<sub>9</sub> 373.0911, found 373.0905; [ $\alpha$ ]<sub>D</sub><sup>24</sup> = +11.2 ( $c = 0.5$ , CH<sub>2</sub>Cl<sub>2</sub>).

<sup>13</sup> Chambers, R. D.; Sandford, G.; Sparrowhawk, M. E.; Atherton, M. J. *J. Chem. Soc., Perkin Trans. I*, **1996**, 1941-1944

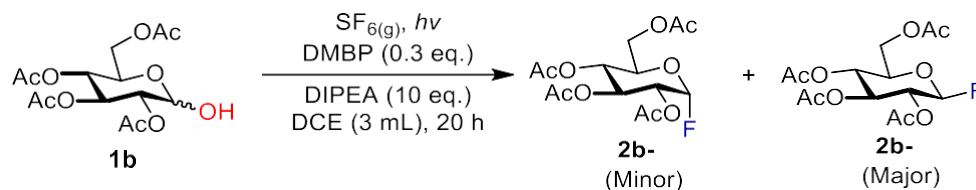

### Synthesis of 2,3,4,6-Tetra-*O*-acetyl-*D*-glucopyranosyl fluoride (**2b**)

The product was synthesized employing a procedure for acetylated glycosides. After a work-up, the reaction mixture was subjected to FCC (SiO<sub>2</sub>, pure hexanes → 40% EtOAc in hexanes) to afford **2b** as amber colored oil (14.1 mg,  $\alpha : \beta = 1 : 4.8$ ) in 53% yield.

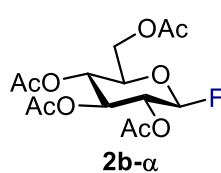

#### 2,3,4,6-Tetra-*O*-acetyl- $\alpha$ -*D*-glucopyranosyl fluoride (Minor product)

**<sup>1</sup>H NMR** (700 MHz, CDCl<sub>3</sub>)  $\delta$  5.75 (dd,  $J = 52.8, 2.8$  Hz, 1H), 5.50 (t,  $J = 9.9$  Hz, 1H), 5.16 (t,  $J = 10.0$  Hz, 1H), 4.96 (ddd,  $J = 24.2, 10.2, 2.8$  Hz, 1H), 4.29 (dd,  $J = 12.5, 4.1$  Hz, 1H), 4.19 (ddd,  $J = 10.3, 4.2, 2.2$  Hz, 1H), 4.15 (dd,  $J = 12.5, 2.2$  Hz, 1H), 2.11 (s, 3H), 2.10 (s, 6H), 2.05 (s, 3H), 2.03 (s, 3H); **<sup>13</sup>C NMR** (176 MHz, CDCl<sub>3</sub>)  $\delta$  170.5, 170.0, 169.9, 169.4, 103.7 (d,  $^1J_{C-F} = 229.5$  Hz,  $\alpha$ -C<sub>1</sub>), 70.2 (d,  $^2J_{C-F} = 24.5$  Hz), 69.8 (d,  $^3J_{C-F} = 4.3$  Hz), 69.4, 67.3, 61.2, 20.7, 20.6, 20.5; **<sup>19</sup>F NMR** (471 MHz, CDCl<sub>3</sub>)  $\delta$  -149.75 (dd,  $J = 52.8, 24.3$  Hz,  $\alpha$ -C<sub>1</sub>-F); **IR** (thin film, cm<sup>-1</sup>): 2918, 1743, 1434, 1367, 1208, 1160, 1103, 1033, 904, 779; **HRMS (ESI-TOF)** ( $m/z$ ): [M+Na]<sup>+</sup> calcd for C<sub>14</sub>H<sub>19</sub>FN<sub>9</sub> 373.0911, found 373.0899

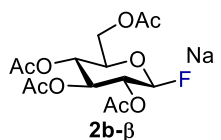

#### 2,3,4,6-Tetra-*O*-acetyl- $\beta$ -*D*-glucopyranosyl fluoride (Major product)

**<sup>1</sup>H NMR** (700 MHz, CDCl<sub>3</sub>)  $\delta$  5.36 (ddd,  $J = 52.0, 6.2, 1.8$  Hz, 1H), 5.20 (tt,  $J = 9.4, 4.8$  Hz, 2H), 5.12 – 5.08 (m, 1H), 4.29 – 4.24 (m, 1H), 4.24 – 4.20 (m, 1H), 3.90 (ddd,  $J = 7.5, 4.9, 2.5$  Hz, 1H), 2.10 (s, 3H), 2.10 (s, 3H), 2.04 (s, 3H), 2.03 (s, 3H); **<sup>13</sup>C NMR** (176 MHz, CDCl<sub>3</sub>)  $\delta$  170.6, 170.0, 169.3, 169.1, 106.2 (d,  $^1J_{C-F} = 219.6$  Hz,  $\beta$ -C<sub>1</sub>), 72.0 (d,  $^3J_{C-F} = 3.8$  Hz), 71.8 (d,  $^3J_{C-F} = 8.3$  Hz), 71.2 (d,  $^2J_{C-F} = 28.8$  Hz), 67.4, 61.7, 20.7, 20.6; **<sup>19</sup>F NMR** (471 MHz, CDCl<sub>3</sub>)  $\delta$  -137.07 (dd,  $J = 51.9, 10.4$  Hz,  $\beta$ -C<sub>1</sub>-F); **IR** (thin film, cm<sup>-1</sup>): 2918, 1743, 1434, 1367, 1208, 1160, 1103, 1033, 904, 779; **HRMS (ESI-TOF)** ( $m/z$ ): [M+Na]<sup>+</sup> calcd for C<sub>14</sub>H<sub>19</sub>FN<sub>9</sub> 373.0911, found 373.0899; [ $\alpha$ ]<sub>D</sub><sup>24</sup> = +13.6 ( $c = 0.5$ , CH<sub>2</sub>Cl<sub>2</sub>)

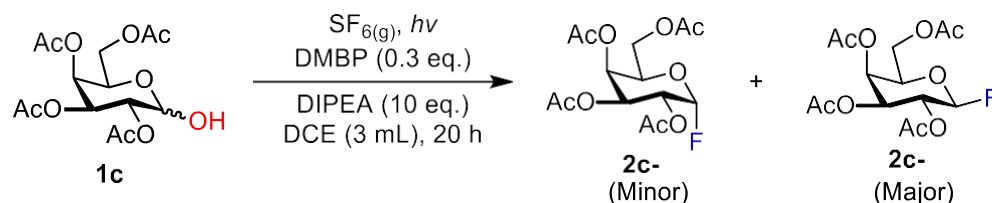

### Synthesis of 2,3,4,6-Tetra-*O*-acetyl-*D*-galactopyranosyl fluoride (**2c**)

The product was synthesized employing a procedure for acetylated glycosides. After a work-up, the reaction mixture was subjected to FCC (SiO<sub>2</sub>, pure hexanes → 40% EtOAc in hexanes) to afford **2c** as amber colored oil (15.6 mg,  $\alpha : \beta = 1 : 3.1$ ) in 45% yield.

**2,3,4,6-Tetra-*O*-acetyl- $\alpha$ -*D*-galactopyranosyl fluoride** (Minor product).  
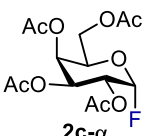
**<sup>1</sup>H NMR** (700 MHz, CDCl<sub>3</sub>)  $\delta$  5.80 (d,  $J = 53.3$  Hz, 1H), 5.53 (t,  $J = 2.5$  Hz, 1H), 5.37 (dt,  $J = 10.8, 2.8$  Hz, 1H), 5.19 (ddt,  $J = 23.8, 10.9, 2.6$  Hz, 1H), 4.41 (t,  $J = 6.7$  Hz, 1H), 4.18 – 4.09 (m, 2H), 2.16 (s, 3H), 2.12 (s, 3H), 2.06 (s, 3H), 2.01 (s, 3H); **<sup>13</sup>C NMR** (176 MHz, cdcl<sub>3</sub>)  $\delta$  170.3, 170.2, 170.0, 169.9, 104.3 (d,  $^1J_{C-F} = 228.4$  Hz,  $\alpha$ -C1), 68.9 (d,  $^3J_{C-F} = 3.5$  Hz), 67.5, 67.3, 67.0, 61.3, 20.7, 20.6, 20.6; **<sup>19</sup>F NMR** (471 MHz, CDCl<sub>3</sub>)  $\delta$  -150.77 (dd,  $J = 53.1, 24.0$  Hz); **IR** (thin film, cm<sup>-1</sup>): 2921, 2851, 1744, 1369, 1212, 1167, 1104, 1042, 951, 899; **HRMS (ESI-TOF)** ( $m/z$ ): [M+Na]<sup>+</sup> calcd for C<sub>14</sub>H<sub>19</sub>FNao<sub>9</sub> 373.0911, found 373.0905; [ $\alpha$ ]<sub>D</sub><sup>25</sup> = +28.1 ( $c = 0.4$ , CH<sub>2</sub>Cl<sub>2</sub>)

**2,3,4,6-Tetra-*O*-acetyl- $\beta$ -*D*-galactopyranosyl fluoride** (Major product).  
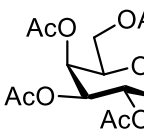
**<sup>1</sup>H NMR** (700 MHz, Chloroform-*d*)  $\delta$  5.44 – 5.40 (m, 1H), 5.35 – 5.21 (m, 2H), 5.04 (dt,  $J = 10.5, 2.8$  Hz, 1H), 4.24 – 4.18 (m, 2H), 4.05 (t,  $J = 6.6$  Hz, 1H), 2.17 (s, 3H), 2.10 (s, 3H), 2.06 (s, 3H), 2.01 (s, 3H); **<sup>13</sup>C NMR** (176 MHz, CDCl<sub>3</sub>)  $\delta$  170.4, 170.0, 169.9, 169.3, 107.1 (d,  $^1J_{C-F} = 218.6$  Hz,  $\beta$ -C1), 71.2 (d,  $^3J_{C-F} = 4.7$  Hz), 70.0 (d,  $^3J_{C-F} = 10.6$  Hz), 68.8 (d,  $^2J_{C-F} = 24.9$  Hz), 66.4, 61.3, 20.7, 20.6, 20.5; **<sup>19</sup>F NMR** (471 MHz, CDCl<sub>3</sub>)  $\delta$  -141.42 (dd,  $J = 50.7, 13.2$  Hz); **IR** (thin film, cm<sup>-1</sup>): 2921, 2851, 1744, 1369, 1212, 1167, 1104, 1042, 951, 899; **HRMS (ESI-TOF)** ( $m/z$ ): [M+Na]<sup>+</sup> calcd for C<sub>14</sub>H<sub>19</sub>FNao<sub>9</sub> 373.0911, found 373.0905; [ $\alpha$ ]<sub>D</sub><sup>25</sup> = +6.0 ( $c = 0.4$ , CH<sub>2</sub>Cl<sub>2</sub>)

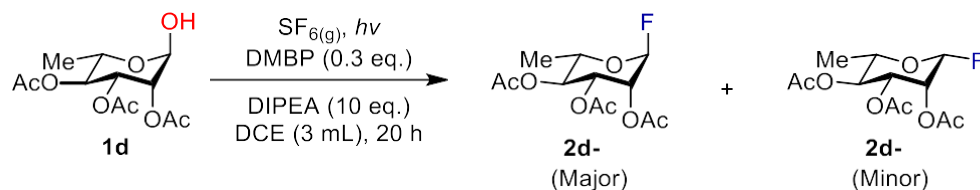

### Synthesis of 2,3,4-tri-*O*-acetyl-*L*-rhamnopyranosyl fluoride (**2d**)

The product was synthesized employing a procedure for acetylated glycosides. After a work-up, the reaction mixture was purified by FCC (SiO<sub>2</sub>, pure hexanes → 10% EtOAc in hexanes) to afford **2d** as amber colored oil (21.3 mg,  $\alpha : \beta = 6.7 : 1$ ) in 73% yield. Stereochemistry of the products was confirmed by comparing with previously reported NMR spectra.<sup>14</sup>

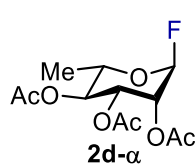

#### 2,3,4-Tri-*O*-acetyl- $\alpha$ -*L*-rhamnopyranosyl fluoride (Major product)

<sup>1</sup>H NMR (500 MHz, CDCl<sub>3</sub>)  $\delta$  5.49 (dd,  $J = 48.6, 1.9$  Hz, 1H), 5.38 (ddd,  $J = 3.2, 1.9, 0.9$  Hz, 1H), 5.29 (ddd,  $J = 10.2, 3.6, 1.7$  Hz, 1H), 5.12 (t,  $J = 10.0$  Hz, 1H), 4.04 (dq,  $J = 9.9, 6.2$  Hz, 1H), 2.16 (s, 3H), 2.06 (s, 3H), 2.00 (s, 3H), 1.27 (d,  $J = 6.3$  Hz, 3H); <sup>13</sup>C NMR (126 MHz, CDCl<sub>3</sub>)  $\delta$  169.8, 169.8, 169.7, 104.8 (d,  $^1J_{C-F} = 221.9$  Hz), 70.0, 68.9 (d,  $^3J_{C-F} = 3.0$  Hz), 68.2 (d,  $^3J_{C-F} = 1.7$  Hz), 70.0 (d,  $^2J_{C-F} = 40.3$  Hz), 20.7, 20.7, 20.6, 17.3; <sup>19</sup>F NMR (376 MHz, CDCl<sub>3</sub>)  $\delta$  -137.47 (d,  $J = 48.9$  Hz); IR (thin film, cm<sup>-1</sup>): 2925, 1748, 1605, 1509, 1457, 1369, 1293, 1242, 1214, 1173, 1038, 974, 929, 893, 830, 813, 793, 778, 684, 640

<sup>14</sup>Nishiyama, K.; Esaki, S.; Deguchi, I.; Sugiyama, N.; Kamiya, S. *Biosci. Biotechnol. Biochem.* **1993**, 57, 107–114

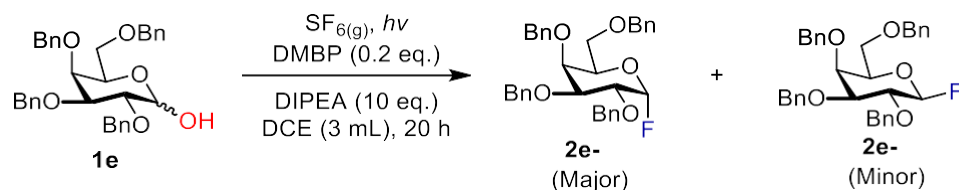

### Synthesis of 2,3,4,6-tetrakis-*O*-(phenylmethyl)-*D*-galactopyranosyl fluoride (**2e**)

The product was synthesized employing the general procedure. After a work-up, the reaction mixture was subjected to FCC ( $\text{SiO}_2$ , pure hexanes  $\rightarrow$  30% EtOAc in hexanes) to afford pure **2e** (46.4 mg,  $\alpha : \beta = 1 : 2.9$ ) in 85% yield as cloudy oil.

**2,3,4,6-Tetrakis-*O*-(phenylmethyl)- $\alpha$ -*D*-galactopyranosyl fluoride** (minor product).  
 **$^1\text{H}$  NMR** (700 MHz,  $\text{CDCl}_3$ )  $\delta$  7.39 – 7.26 (m, 20H), 5.59 (dd,  $J = 53.7, 2.7$  Hz, 1H), 4.94 (d,  $J = 11.3$  Hz, 1H), 4.83 (dd,  $J = 23.1, 11.7$  Hz, 2H), 4.74 (dd,  $J = 20.8, 11.8$  Hz, 2H), 4.57 (d,  $J = 11.3$  Hz, 1H), 4.48 (d,  $J = 11.8$  Hz, 1H), 4.42 (d,  $J = 11.8$  Hz, 1H), 4.13 – 4.09 (m, 1H), 4.08 – 4.01 (m, 2H), 3.95 (dd,  $J = 10.1, 2.7$  Hz, 1H), 3.55 (d,  $J = 5.9$  Hz, 2H);  **$^{13}\text{C}$  NMR** (176 MHz,  $\text{CDCl}_3$ )  $\delta$  138.4, 138.4, 138.0, 137.7, 128.4, 128.4, 128.3, 128.2, 128.0, 127.9, 127.8, 127.8, 127.7, 127.7, 127.5, 106.2 (d,  $^1J_{\text{C-F}} = 226.1$  Hz,  $\alpha$ -C1), 78.4, 75.7 (d,  $^2J_{\text{C-F}} = 23.8$  Hz), 74.8, 74.3, 73.7, 73.5, 73.1, 71.7 (d,  $^3J_{\text{C-F}} = 2.8$  Hz), 68.2;  **$^{19}\text{F}$  NMR** (471 MHz,  $\text{CDCl}_3$ )  $\delta$  -150.10 (dd,  $J = 53.7, 25.2$  Hz); **IR** (thin film,  $\text{cm}^{-1}$ ): 3030, 2870, 1496, 1453, 1363, 1302, 1208, 1099, 1053, 1027, 910, 820, 732, 695, 632; **HRMS (ESI-TOF)** ( $m/z$ ):  $[\text{M}+\text{Na}]^+$  calcd for  $\text{C}_{34}\text{H}_{35}\text{FNaO}_5$  565.2392, found 565.2353;  $[\alpha]_{\text{D}}^{23} = +26.2$  ( $c = 0.4$ ,  $\text{CH}_2\text{Cl}_2$ )

**2,3,4,6-Tetrakis-*O*-(phenylmethyl)- $\beta$ -*D*-galactopyranosyl fluoride** (major product).  
 **$^1\text{H}$  NMR** (700 MHz,  $\text{CDCl}_3$ )  $\delta$  7.39 – 7.27 (m, 20H), 5.19 (dd,  $J = 53.1, 7.0$  Hz, 1H), 4.95 (d,  $J = 11.5$  Hz, 1H), 4.86 (d,  $J = 11.0$  Hz, 1H), 4.80 – 4.71 (m, 3H), 4.61 (d,  $J = 11.5$  Hz, 1H), 4.50 (d,  $J = 11.8$  Hz, 1H), 4.43 (d,  $J = 11.8$  Hz, 1H), 3.99 – 3.91 (m, 2H), 3.69 – 3.61 (m, 3H), 3.56 (ddd,  $J = 9.6, 2.9, 0.9$  Hz, 1H);  **$^{13}\text{C}$  NMR** (176 MHz,  $\text{CDCl}_3$ )  $\delta$  138.3, 138.1, 138.1, 137.6, 128.4, 128.4, 128.3, 128.2, 128.1, 128.1, 127.9, 127.9, 127.7, 127.7, 127.6, 127.5, 110.2 (d,  $^1J_{\text{C-F}} = 215.4$  Hz,  $\beta$ -C1), 81.0 (d,  $^3J_{\text{C-F}} = 11.3$  Hz), 79.1 (d,  $^2J_{\text{C-F}} = 20.8$  Hz), 75.0, 75.0, 74.6, 73.6, 73.6, 73.1, 73.0, 68.3;  **$^{19}\text{F}$  NMR** (471 MHz,  $\text{CDCl}_3$ )  $\delta$  -139.13 (d,  $J = 53.4$  Hz); **IR** (thin film,  $\text{cm}^{-1}$ ): 3030, 2870, 1496, 1453, 1363, 1302, 1208, 1099, 1053, 1027, 910, 820, 732, 695, 632; **HRMS (ESI-TOF)** ( $m/z$ ):  $[\text{M}+\text{Na}]^+$  calcd for  $\text{C}_{34}\text{H}_{35}\text{FNaO}_5$  565.2392, found 565.2353;  $[\alpha]_{\text{D}}^{23} = +29.8$  ( $c = 1.1$ ,  $\text{CH}_2\text{Cl}_2$ )

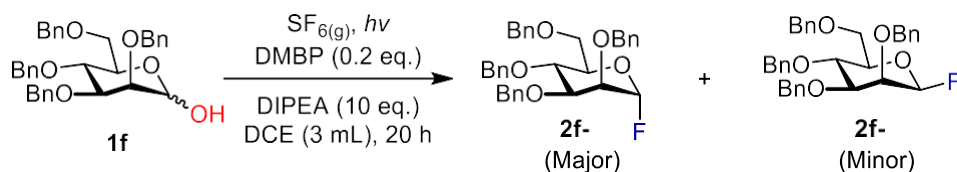

### Synthesis of 2,3,4,6-tetrakis-O-(phenylmethyl)-D-mannopyranosyl fluoride (**2f**)

The product was synthesized employing the general procedure. After a work-up, the reaction mixture was subjected to FCC ( $\text{SiO}_2$ , pure hexanes  $\rightarrow$  30% EtOAc in hexanes) to afford **2f** as cloudy oil (37.6 mg,  $\alpha : \beta = 19 : 1$ ) in 69% yield. Stereochemistry of products was confirmed by comparing with previously reported NMR spectra.<sup>15</sup>

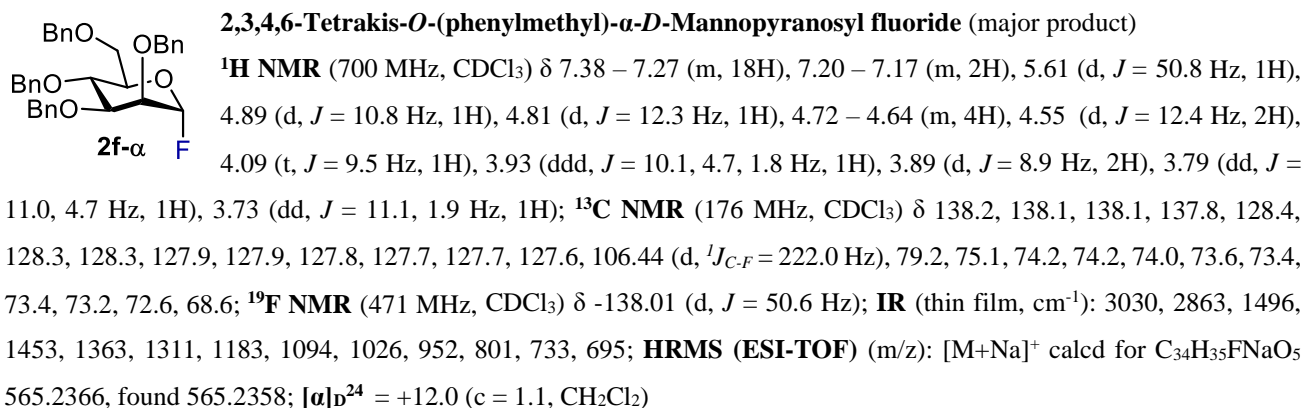

<sup>15</sup> Zeng, J.; Vedachalam, S.; Xiang, S.; Liu, X-W. *Org. Lett.* **2011**, 13, 1, 42-45

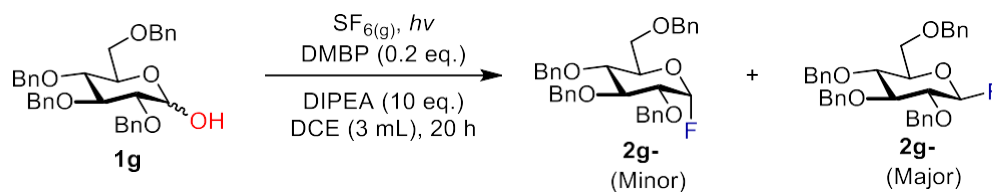

### Synthesis of 2,3,4,6-tetrakis-*O*-(phenylmethyl)-*D*-glucopyranosyl fluoride (2g)

The product was synthesized employing the general procedure. After a work-up, the reaction mixture was subjected to FCC (SiO<sub>2</sub>, pure hexanes → 20% EtOAc in hexanes) to afford **2g** as cloudy oil (44.1 mg,  $\alpha : \beta = 1 : 3.7$ ) in 81% yield.

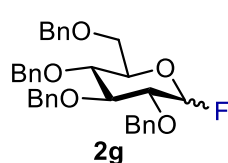

### 2,3,4,6-Tetrakis-*O*-(phenylmethyl)-*D*-glucopyranosyl fluoride (2g)

(Isolated as  $\alpha : \beta = 1 : 3.7$ )

**<sup>1</sup>H NMR** (700 MHz, Chloroform-*d*)  $\delta$  7.41 – 7.28 (m, 24.2H), 7.18 (dd,  $J = 7.3, 2.3$  Hz, 2.65H), 5.59 (dd,  $J = 53.2, 2.6$  Hz, 0.27H,  $\alpha$ -C<sub>1</sub>-H), 5.29 (dd,  $J = 52.9, 6.8$  Hz, 1H,  $\beta$ -C<sub>1</sub>-H), 4.99 (d,  $J = 10.9$  Hz, 0.29H), 4.93 (d,  $J = 11.0$  Hz, 1H), 4.90 – 4.86 (m, 1.61H), 4.85 – 4.80 (m, 2.32H), 4.74 (d,  $J = 11.2$  Hz, 1.40H), 4.66 (d,  $J = 12.1$  Hz, 1H), 4.63 (d,  $J = 12.1$  Hz, 0.36H), 4.57 (dd,  $J = 11.5, 3.0$  Hz, 2H), 4.55 (d,  $J = 10.8$  Hz, 0.35H), 4.51 (d,  $J = 12.2$  Hz, 0.33H), 4.02 (t,  $J = 9.4$  Hz, 0.28H), 4.00 – 3.96 (m, 0.28H), 3.80 – 3.74 (m, 3.68H), 3.73 – 3.68 (m, 1.37H), 3.66 – 3.57 (m, 2.40H); **<sup>13</sup>C NMR** (176 MHz, CDCl<sub>3</sub>)  $\delta$  138.4, 138.2, 138.0, 137.8, 137.8, 137.7, 137.6, 137.6, 128.5, 128.4, 128.4, 128.4, 128.4, 128.11, 128.0, 128.0, 127.9, 127.9, 127.8, 127.8, 127.8, 127.8, 127.7, 127.7, 127.7, 109.8 (d,  $^1J_{C-F} = 215.9$  Hz,  $\beta$ -C<sub>1</sub>), 105.5 (d,  $^1J_{C-F} = 226.8$  Hz,  $\alpha$ -C<sub>1</sub>), 83.4 (d,  $^3J_{C-F} = 11.2$  Hz), 81.5, 81.4, 81.4, 79.3 (d,  $^2J_{C-F} = 24.8$  Hz), 76.6, 75.8, 75.4, 75.1, 74.9, 74.8 (d,  $^3J_{C-F} = 4.9$  Hz), 74.4 (d,  $^3J_{C-F} = 2.1$  Hz), 73.5, 73.5 (d,  $^3J_{C-F} = 3.4$  Hz), 72.6 (d,  $J = 3.9$  Hz), 68.3, 67.8; **<sup>19</sup>F NMR** (471 MHz, CDCl<sub>3</sub>)  $\delta$  -137.93 (dd,  $J = 53.4, 11.8$  Hz), -149.47 (dd,  $J = 53.5, 25.5$  Hz); **IR** (thin film, cm<sup>-1</sup>): 3030, 2867, 1496, 1453, 1360, 1308, 1208, 1155, 1088, 1062, 909, 821, 733. 695; **HRMS (ESI-TOF)** (*m/z*): [M+Na]<sup>+</sup> calcd for C<sub>34</sub>H<sub>35</sub>FN<sub>5</sub>O<sub>5</sub> 565.2392, found 565.2353

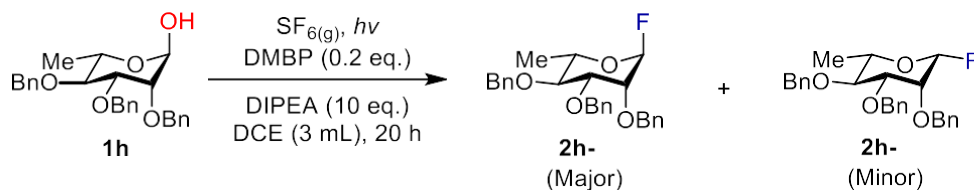

### Synthesis of 2,3,4-tris-*O*-(phenylmethyl)-*L*-rhamnopyranosyl fluoride (2h)

The product was synthesized employing the general procedure. The product was purified by FCC (SiO<sub>2</sub>, pure hexanes → 20% EtOAc in hexanes) and was obtained as amber colored oil (29.7 mg,  $\alpha : \beta = 5 : 1$ ) in 68% yield. The structure of the product was confirmed by comparing with previously reported data.

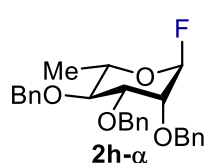

### 2,3,4-Tris-*O*-(phenylmethyl)- $\alpha$ -*L*-rhamnopyranosyl fluoride (Major product)

**<sup>1</sup>H NMR** (700 MHz, CDCl<sub>3</sub>)  $\delta$  7.38 – 7.29 (m, 15H), 5.49 (dd,  $J = 50.6, 2.0$  Hz, 1H), 4.95 (d,  $J = 10.9$  Hz, 1H), 4.81 (d,  $J = 12.2$  Hz, 1H), 4.72 – 4.64 (m, 4H), 3.89 – 3.82 (m, 3H), 3.67 (t,  $J = 9.4$  Hz, 1H), 1.36 (d,  $J = 6.2$  Hz, 3H); **<sup>13</sup>C NMR** (176 MHz, CDCl<sub>3</sub>)  $\delta$  138.3, 138.2, 137.8, 128.5, 128.4, 128.4, 128.0, 128.0, 127.9, 127.7, 127.7, 127.7, 106.4 (d,  $^1J_{C-F} = 221.1$  Hz), 79.6, 79.2, 75.4, 73.7 (d,  $^2J_{C-F} = 35.2$  Hz), 73.4, 72.6, 70.6 (d,  $^3J_{C-F} = 2.3$  Hz), 17.9; **<sup>19</sup>F NMR** (471 MHz, CDCl<sub>3</sub>)  $\delta$  -137.07 (d,  $J = 50.6$  Hz); **IR** (thin film, cm<sup>-1</sup>): 3030, 2922, 1721, 1496, 1453, 1363, 1248, 1207, 1184, 1074, 1027, 911, 841, 734, 695; **HRMS (ESI-TOF)** ( $m/z$ ): [M+Na]<sup>+</sup> calcd for C<sub>27</sub>H<sub>29</sub>FNao<sub>4</sub> 459.1948, found 459.1948; [ $\alpha$ ]<sub>D</sub><sup>23.6</sup> = +7.66 ( $c = 1.1$ , CH<sub>2</sub>Cl<sub>2</sub>)

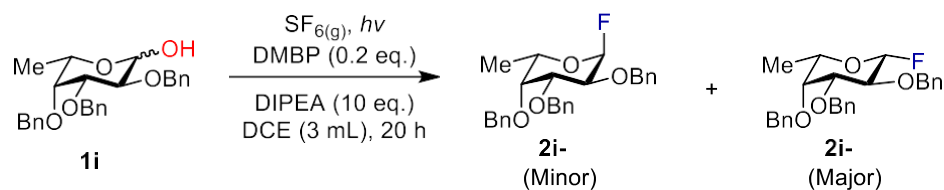

### Synthesis of 2,3,4-tris-*O*-(phenylmethyl)-*L*-fucopyranosyl fluoride (**2i**)

The product was synthesized employing the general procedure. The product was purified by FCC ( $\text{SiO}_2$ , pure hexanes  $\rightarrow$  20% EtOAc in hexanes) and was obtained as amber colored oil (35 mg,  $\alpha : \beta = 1 : 3.6$ ) in 80% yield.

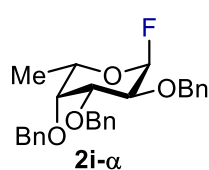

#### 2,3,4-Tris-*O*-(phenylmethyl)- $\alpha$ -*L*-fucopyranosyl fluoride (minor product).

**$^1\text{H}$  NMR** (700 MHz, Chloroform-*d*)  $\delta$  7.41 – 7.27 (m, 15H), 5.57 (dd,  $J = 54.0$ , 2.8 Hz, 1H), 4.99 (d,  $J = 11.5$  Hz, 1H), 4.85 (dd,  $J = 11.8$ , 3.9 Hz, 2H), 4.75 (dd,  $J = 19.1$ , 11.8 Hz, 2H), 4.66 (d,  $J = 11.5$  Hz, 1H), 4.08 – 4.00 (m, 2H), 3.94 (dd,  $J = 10.1$ , 2.7 Hz, 1H), 3.70 (dd,  $J = 2.8$ , 1.2 Hz, 1H), 1.17 (d,  $J = 6.5$  Hz, 3H);  **$^{13}\text{C}$  NMR** (176 MHz,  $\text{CDCl}_3$ )  $\delta$  138.5, 138.3, 138.1, 128.5, 128.4, 128.4, 128.3, 128.0, 127.8, 127.7, 127.7, 127.5, 106.4 (d,  $^1J_{\text{C-F}} = 224.5$  Hz,  $\alpha$ -C<sub>1</sub>), 78.8, 75.6 (d,  $^2J_{\text{C-F}} = 23.9$  Hz), 74.9, 73.7, 73.2, 69.1 (d,  $^3J_{\text{C-F}} = 3.2$  Hz), 16.5;  **$^{19}\text{F}$  NMR** (471 MHz,  $\text{CDCl}_3$ )  $\delta$  -149.66 (dd,  $J = 54.1$ , 25.3 Hz); **IR** (thin film,  $\text{cm}^{-1}$ ): 3030, 2872, 1496, 1453, 1361, 1307, 1208, 1100, 1056, 1027, 912, 801, 732, 695, 629; **HRMS (ESI-TOF)** ( $m/z$ ):  $[\text{M}+\text{Na}]^+$  calcd for  $\text{C}_{27}\text{H}_{29}\text{FNaO}_4$  459.1892, found 459.1917;  $[\alpha]_{\text{D}}^{24} = -41.9$  ( $c=0.5$ ,  $\text{CH}_2\text{Cl}_2$ )

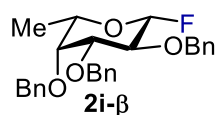

#### 2,3,4-tris-*O*-(phenylmethyl)- $\beta$ -*L*-fucopyranosyl fluoride (major product).

**$^1\text{H}$  NMR** (700 MHz,  $\text{CDCl}_3$ )  $\delta$  7.41 – 7.28 (m, 15H), 5.16 (dd,  $J = 53.3$ , 7.1 Hz, 1H), 5.00 (d,  $J = 11.6$  Hz, 1H), 4.87 (d,  $J = 10.9$  Hz, 2H), 4.80 (d,  $J = 11.7$  Hz, 1H), 4.79 (d,  $J = 10.8$  Hz, 1H), 4.74 (d,  $J = 11.8$  Hz, 1H), 4.69 (d,  $J = 11.6$  Hz, 1H), 3.94 (ddd,  $J = 13.3$ , 9.7, 7.0 Hz, 1H), 3.60 (m, 2H), 3.55 (dd,  $J = 9.8$ , 2.9 Hz, 1H), 1.26 (d,  $J = 6.4$  Hz, 3H);  **$^{13}\text{C}$  NMR** (176 MHz,  $\text{CDCl}_3$ )  $\delta$  138.2, 138.2, 138.2, 128.4, 128.3, 128.3, 128.2, 128.1, 127.7, 127.7, 127.6, 110.3 (d,  $^1J_{\text{C-F}} = 213.5$  Hz,  $\beta$ -C<sub>1</sub>), 81.4 (d,  $^3J_{\text{C-F}} = 11.7$  Hz), 79.0 (d,  $^2J_{\text{C-F}} = 20.6$  Hz), 75.8, 74.9, 74.7, 73.3, 70.8 (d,  $^3J_{\text{C-F}} = 4.9$  Hz), 16.6;  **$^{19}\text{F}$  NMR** (471 MHz,  $\text{CDCl}_3$ )  $\delta$  -139.10 (dd,  $J = 53.2$ , 13.1 Hz); **IR** (thin film,  $\text{cm}^{-1}$ ): 3030, 2872, 1496, 1453, 1361, 1307, 1208, 1100, 1056, 1027, 912, 801, 732, 695, 629; **HRMS (ESI-TOF)** ( $m/z$ ):  $[\text{M}+\text{Na}]^+$  calcd for  $\text{C}_{27}\text{H}_{29}\text{FNaO}_4$  459.1892, found 459.1917;  $[\alpha]_{\text{D}}^{24} = -54.2$  ( $c=0.7$ ,  $\text{CH}_2\text{Cl}_2$ )

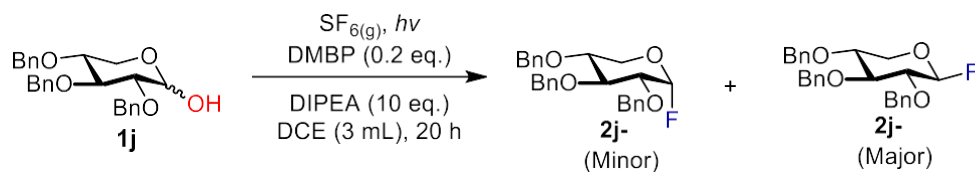

### Synthesis of 2,3,4-tris-*O*-(phenylmethyl)-*D*-xylopyranosyl fluoride (**2j**)

The product was synthesized employing the general procedure. The product was purified by FCC (SiO<sub>2</sub>, pure hexanes → 20% EtOAc in hexanes) and was obtained as amber colored oil (33.7 mg,  $\alpha : \beta = 1 : 4.3$ ) in 80% yield.

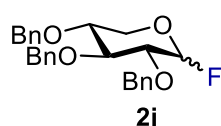

### 2,3,4-Tris-*O*-(phenylmethyl)-*D*-xylopyranosyl fluoride

(Isolated as  $\alpha : \beta = 1 : 4.3$  mixture).

**<sup>1</sup>H NMR** (700 MHz, CDCl<sub>3</sub>)  $\delta$  7.40 – 7.30 (m, 19.57H), 5.48 (dd,  $J = 53.1, 2.7$  Hz, 0.23H,  $\alpha$ -C<sub>1</sub>-H), 5.35 (dd,  $J = 54.0, 5.6$  Hz, 1H,  $\beta$ -C<sub>1</sub>-H), 4.93 (s, 0.45H), 4.84 – 4.76 (m, 3.49H), 4.73 – 4.68 (m, 2.45H), 4.67 – 4.60 (m, 1.56H), 4.06 (ddd,  $J = 12.2, 4.2, 1.6$  Hz, 1H), 3.93 (t,  $J = 9.3$  Hz, 0.25H), 3.79 (dd,  $J = 11.3, 5.8$  Hz, 0.38H), 3.74 – 3.66 (m, 2.32H), 3.63 (ddd,  $J = 10.8, 9.0, 5.7$  Hz, 0.33H), 3.60 – 3.52 (m, 2H), 3.48 (ddd,  $J = 25.7, 9.6, 2.7$  Hz, 0.34H); **<sup>13</sup>C NMR** (176 MHz, CDCl<sub>3</sub>)  $\delta$  138.2, 137.8, 137.7, 128.5, 128.5, 128.4, 128.4, 128.3, 128.3, 128.0, 128.0, 128.0, 127.9, 127.9, 127.9, 127.8, 127.8, 127.8, 127.7, 127.7, 127.7, 110.1 (d,  $^1J_{C-F} = 218.6$  Hz,  $\beta$ -C<sub>1</sub>), 105.6 (d,  $^1J_{C-F} = 227.4$  Hz,  $\alpha$ -C<sub>1</sub>), 80.8, 80.6 (d,  $^3J_{C-F} = 9.1$  Hz), 79.7 (d,  $^2J_{C-F} = 25.1$  Hz), 79.1 (d,  $^2J_{C-F} = 24.8$  Hz), 76.7, 75.8, 74.7, 74.1, 74.1, 73.6 (d,  $^2J_{C-F} = 18.3$  Hz), 72.7, 71.0 (d,  $^3J_{C-F} = 9.7$  Hz), 63.2 (d,  $^3J_{C-F} = 4.4$  Hz), 61.9 (d,  $^3J_{C-F} = 4.7$  Hz); **<sup>19</sup>F NMR** (471 MHz, CDCl<sub>3</sub>)  $\delta$  -134.11 (dd,  $J = 53.9, 11.6$  Hz), -151.07 (dd,  $J = 53.1, 25.7$  Hz); **IR** (thin film, cm<sup>-1</sup>): 3030, 2869, 1496, 1453, 1361, 1257, 1208, 1162, 1088, 1027, 942, 733, 695, 618; **HRMS (ESI-TOF)** ( $m/z$ ): [M+Na]<sup>+</sup> calcd for C<sub>26</sub>H<sub>27</sub>FN<sub>4</sub>O<sub>4</sub> 445.1792, found 445.1780.

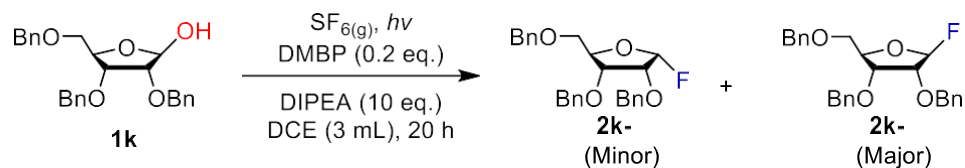

### Synthesis of 2,3,5-Tris-*O*-(phenylmethyl)-D-ribofuranosyl fluoride (**2k**)

The product was synthesized employing the general procedure. The product was purified by FCC ( $\text{SiO}_2$ , pure hexanes  $\rightarrow$  30% EtOAc in hexanes) and was obtained as amber colored oil (33.5 mg,  $\alpha : \beta = 1 : 13$ ) in 79% yield.

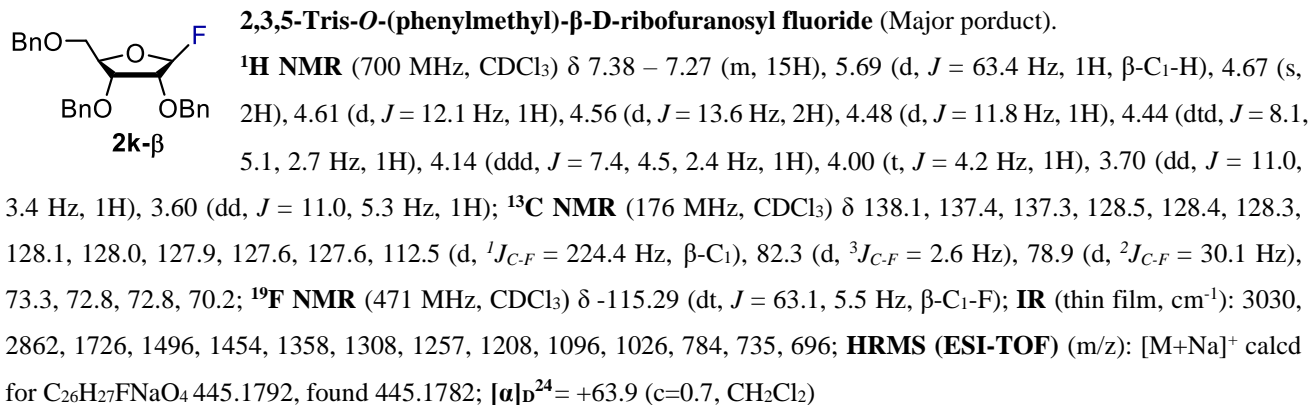

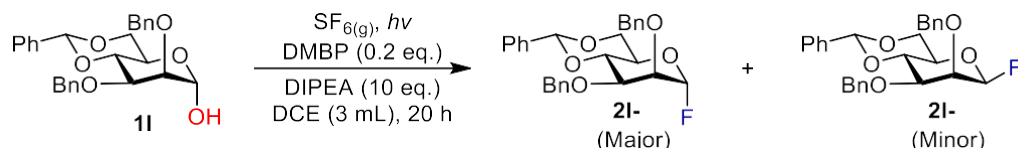

### Synthesis of 2,3-bis-*O*-(phenylmethyl)-4,6-*O*-[(*R*)-phenylmethylene]-*D*-mannopyranosyl fluoride (2I)

The product was synthesized employing the general procedure. The product was purified by FCC (SiO<sub>2</sub>, pure hexanes → 40% EtOAc in hexanes) and was obtained as amber colored oil (29.5 mg,  $\alpha : \beta = 7.8 : 1$ ) in 66% yield. Stereochemistry of the products was determined by comparing with previously reported NMR spectra.<sup>16</sup>

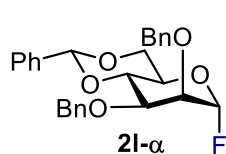

#### 2,3-Bis-*O*-(phenylmethyl)-4,6-*O*-[(*R*)-phenylmethylene]- $\alpha$ -*D*-mannopyranosyl fluoride (major product).

**<sup>1</sup>H NMR** (700 MHz, CDCl<sub>3</sub>)  $\delta$  7.51 (d,  $J = 7.1$  Hz, 2H), 7.41 – 7.28 (m, 13H), 5.65 (s, 1H), 5.50 (d,  $J = 49.6$  Hz, 1H), 4.89 (d,  $J = 12.0$  Hz, 2H), 4.74 – 4.68 (m, 2H), 4.33 – 4.27 (m, 2H), 3.99 – 3.92 (m, 3H), 3.87 (td,  $J = 10.3$ , 2.0 Hz, 1H); **<sup>13</sup>C NMR** (176 MHz, CDCl<sub>3</sub>)  $\delta$  138.3, 137.6, 137.4, 128.9, 128.5, 128.4, 128.2, 128.1, 128.1, 127.7, 127.6, 126.1, 107.0 (d,  $^1J_{C-F} = 223.7$  Hz), 101.6, 78.3, 75.5 (d,  $^3J_{C-F} = 2.5$  Hz), 75.0, 74.8, 74.2, 73.5, 68.3, 66.1 (d,  $^3J_{C-F} = 2.4$  Hz); **<sup>19</sup>F NMR** (471 MHz, CDCl<sub>3</sub>)  $\delta$  -137.06 (d,  $J = 49.7$  Hz); **IR** (thin film, cm<sup>-1</sup>): 2919, 1454, 1372, 1313, 1214, 1166, 1099, 1054, 1006, 965, 925, 799, 735, 696, 641; **HRMS (ESI-TOF)** (m/z): [M+Na]<sup>+</sup> calcd for C<sub>27</sub>H<sub>27</sub>FNaO<sub>5</sub> 473.1692, found 473.1729; [ $\alpha$ ]<sub>D</sub><sup>23</sup> = -17.4 (c = 0.6, CH<sub>2</sub>Cl<sub>2</sub>).

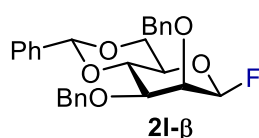

#### 2,3-Bis-*O*-(phenylmethyl)-4,6-*O*-[(*R*)-phenylmethylene]- $\beta$ -*D*-mannopyranosyl fluoride (minor product, isolated as $\alpha : \beta = 1 : 7$ mixture).

**<sup>1</sup>H NMR** (700 MHz, CDCl<sub>3</sub>)  $\delta$  7.49 (d,  $J = 7.2$  Hz, 2H), 7.44 (d,  $J = 7.5$  Hz, 2H), 7.40 – 7.28 (m, 11H), 5.62 (s, 1H), 5.30 (d,  $J = 49.2$  Hz, 1H), 4.93 – 4.80 (m, 2H), 4.71 (ddd,  $J = 84.0$ , 12.3, 2.2 Hz, 2H), 4.38 – 4.34 (m, 1H), 4.25 (td,  $J = 9.8$ , 2.1 Hz, 1H), 4.01 (t,  $J = 3.3$  Hz, 1H), 3.95 (td,  $J = 10.4$ , 1.9 Hz, 1H), 3.67 (dt,  $J = 9.8$ , 2.8 Hz, 1H), 3.41 (td,  $J = 10.3$ , 9.6, 2.9 Hz, 1H); **<sup>13</sup>C NMR** (176 MHz, CDCl<sub>3</sub>)  $\delta$  138.0, 137.8, 137.2, 129.0, 128.4, 128.3, 128.2, 127.8, 127.8, 127.7, 126.0, 107.6 (d,  $^1J_{C-F} = 217.5$  Hz), 101.5, 78.2, 75.0 (d,  $^2J_{C-F} = 17.0$  Hz), 74.7 (d,  $^4J_{C-F} = 1.6$  Hz), 72.8, 68.3, 66.8 (d,  $^3J_{C-F} = 5.3$  Hz); **<sup>19</sup>F NMR** (471 MHz, CDCl<sub>3</sub>)  $\delta$  -142.75 (d,  $J = 49.3$  Hz); **IR** (thin film, cm<sup>-1</sup>): 2919, 1454, 1372, 1313, 1214, 1166, 1099, 1054, 1006, 965, 925, 799, 735, 696, 641; **HRMS (ESI-TOF)** (m/z): [M+Na]<sup>+</sup> calcd for C<sub>27</sub>H<sub>27</sub>FNaO<sub>5</sub> 473.1692, found 473.1729; [ $\alpha$ ]<sub>D</sub><sup>23</sup> = -35.4 (c = 0.1, CH<sub>2</sub>Cl<sub>2</sub>).

<sup>16</sup>Lee, Y. J.; Baek, J. Y.; Lee, B.-Y.; Kang, S. S.; Park, H.-S.; Jeon, H. B.; Kim, K. S. Carbohydrate Research. **2006**. 341(10). 1708-1716

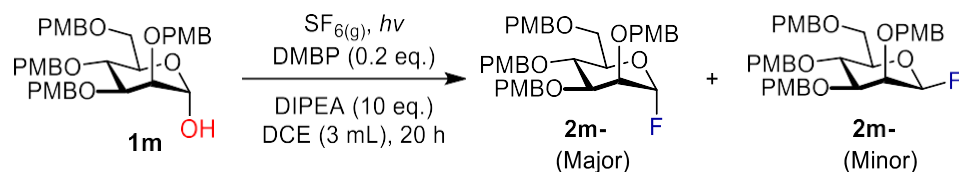

### Synthesis of 2,3,4,6-Tetrakis-*O*-[(4-methoxyphenyl)methyl]-*D*-mannopyranosyl fluoride (2m)

The product was synthesized employing the general procedure. The product was purified by FCC (SiO<sub>2</sub>, pure hexanes → 10% EtOAc in hexanes) and was obtained as cloudy oil (49.2 mg,  $\alpha : \beta = 36 : 1$ ) in 74% yield

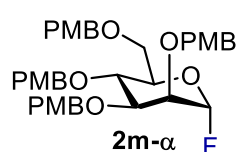

### 2,3,4,6-Tetrakis-*O*-[(4-methoxyphenyl)methyl]- $\alpha$ -*D*-mannopyranosyl fluoride

(Major Product)

**<sup>1</sup>H NMR** (500 MHz, CDCl<sub>3</sub>)  $\delta$  7.29 – 7.24 (m, 6H), 7.06 (d,  $J = 8.6$  Hz, 2H), 6.90 – 6.79 (m, 8H), 5.53 (dd,  $J = 50.6, 1.6$  Hz, 1H), 4.75 (dd,  $J = 24.8, 11.2$  Hz, 2H), 4.64 – 4.53 (m, 4H), 4.44 (dd,  $J = 21.7, 11.1$  Hz, 2H), 4.00 – 3.95 (m, 1H), 3.86 (ddd,  $J = 10.0, 4.8, 1.8$  Hz, 1H), 3.80 (dd,  $J = 10.6, 4.1$  Hz, 14H), 3.71 (dd,  $J = 11.0, 4.7$  Hz, 1H), 3.66 (dd,  $J = 10.9, 2.0$  Hz, 1H); **<sup>13</sup>C NMR** (126 MHz, cdcl<sub>3</sub>)  $\delta$  159.4, 159.2, 159.2, 159.2, 130.4, 130.4, 130.2, 129.9, 129.6, 129.6, 129.3, 113.8, 113.7, 106.5 (d,  $^1J_{C-F} = 221.9$  Hz), 78.8, 74.7, 74.2, 74.2, 73.7, 73.1, 73.0, 72.9, 72.8, 72.2, 68.2, 55.3, 55.2, 55.2; **<sup>19</sup>F NMR** (471 MHz, CDCl<sub>3</sub>)  $\delta$  -137.88 (d,  $J = 50.6$  Hz); **IR** (thin film, cm<sup>-1</sup>): 2908, 2835, 1611, 1585, 1512, 1463, 1442, 1422, 1361, 1301, 1244, 1172, 1090, 1030, 950, 816, 756, 711, 667, 636; **HRMS (ESI-TOF)** (m/z): [M+Na]<sup>+</sup> calcd for C<sub>38</sub>H<sub>43</sub>FNao<sub>9</sub> 685.2783, found 685.2753; [ $\alpha$ ]<sub>D</sub><sup>24</sup> = +7.45 (c = 0.88, CH<sub>2</sub>Cl<sub>2</sub>).

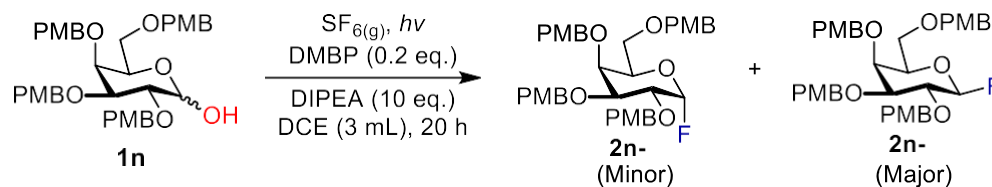

### Synthesis of 2,3,4,6-tetrakis-*O*-[(4-methoxyphenyl)methyl]-D-galactopyranosyl fluoride (2n)

The product was synthesized employing the general procedure. The product was purified by FCC ( $\text{SiO}_2$ , pure hexanes  $\rightarrow$  30% EtOAc in hexanes) and was obtained as cloudy oil (37.5 mg,  $\alpha : \beta = 1 : 2.4$ ) in 72% yield

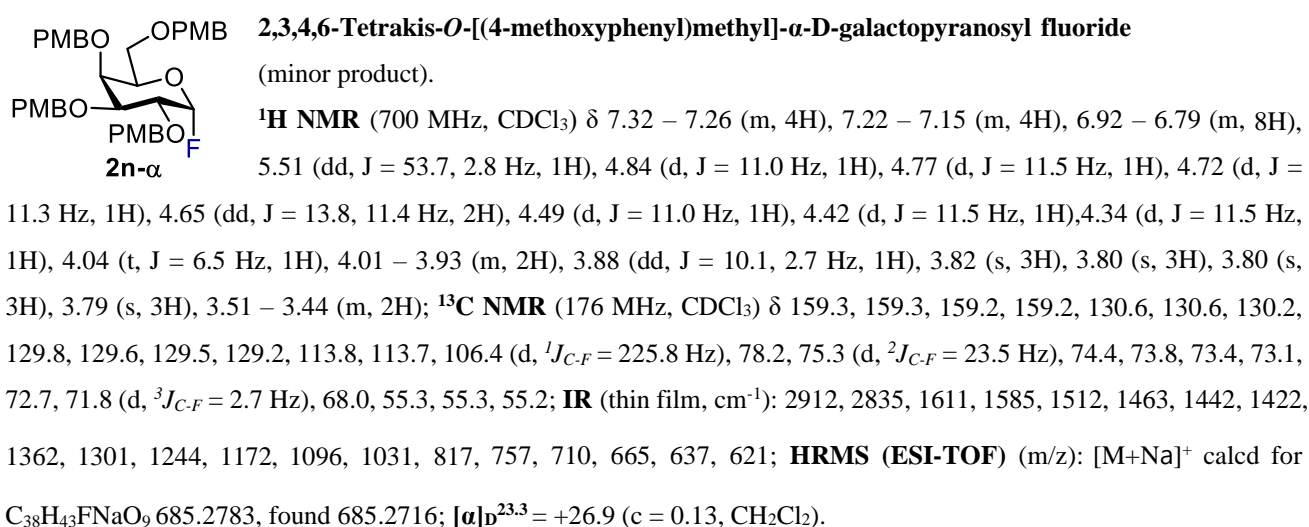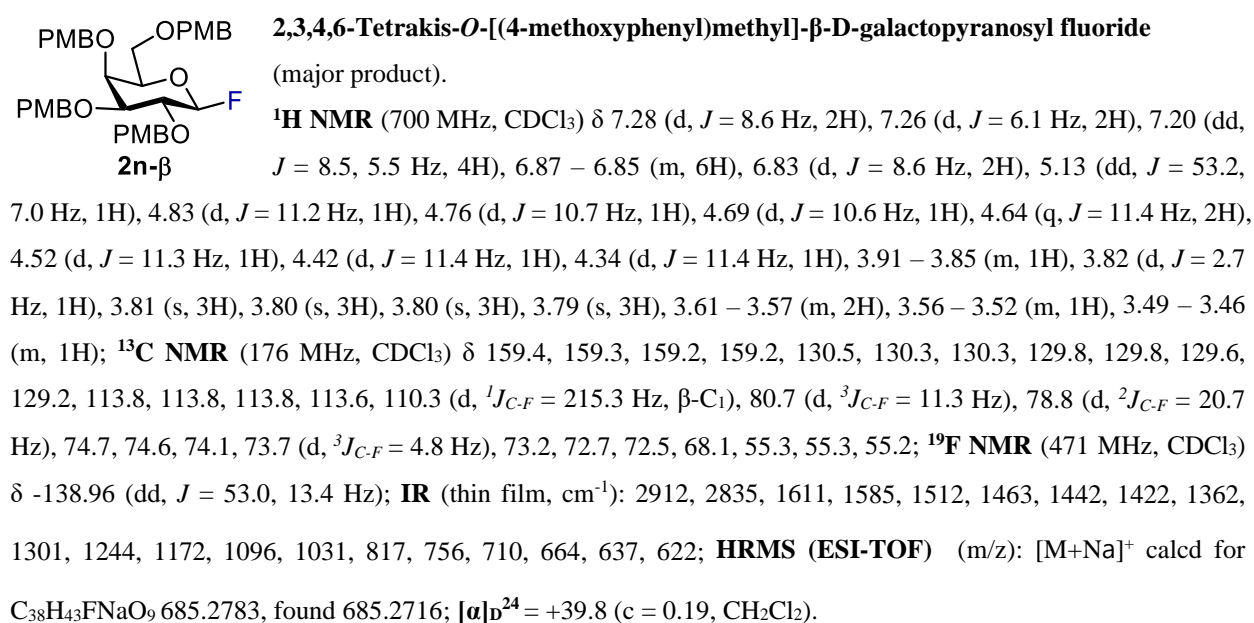

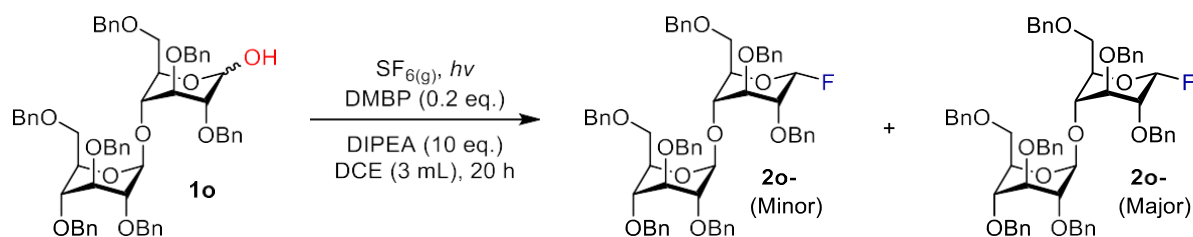

**Synthesis of 2,3,6-Tris-O-(phenylmethyl)-4-O-[2,3,4,6-tetrakis-O-(phenylmethyl)-β-D-glucopyranosyl]-D-glucopyranosyl fluoride (2o)**

The product was synthesized employing the general procedure.. The product was purified by FCC (SiO<sub>2</sub>, pure hexanes → 20% EtOAc in hexanes) to afford **2o** as cloudy oil (68 mg, α : β = 1 : 3.4) in 70% yield.

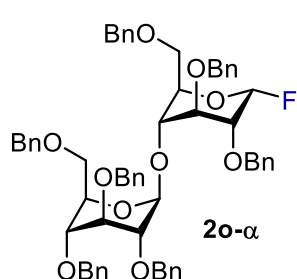

**2,3,6-Tris-O-(phenylmethyl)-4-O-[2,3,4,6-tetrakis-O-(phenylmethyl)-β-D-glucopyranosyl]-α-D-glucopyranosyl fluoride (minor product).**

**<sup>1</sup>H NMR** (700 MHz, CDCl<sub>3</sub>) δ 7.40 (d, *J* = 6.5 Hz, 2H), 7.33 – 7.20 (m, 31H), 7.19 (d, *J* = 7.4 Hz, 2H), 5.48 (dd, *J* = 53.4, 2.7 Hz, 1H, α-C<sub>1</sub>-H), 5.12 (dd, *J* = 11.4, 2.0 Hz, 1H), 4.89 – 4.86 (m, 1H), 4.83 – 4.72 (m, 6H), 4.63 (dd, *J* = 11.9, 2.0 Hz, 1H), 4.56 (d, *J* = 11.5 Hz, 2H), 4.44 (dd, *J* = 12.3, 2.0 Hz, 1H), 4.39 (ddd, *J* = 11.7, 6.9, 2.8 Hz, 3H), 4.07 – 4.03 (m, 1H), 3.90 – 3.84 (m, 2H), 3.80 (dd, *J* = 10.1, 2.2 Hz, 1H), 3.73 (d, *J* = 10.9 Hz, 1H), 3.61 (t, *J* = 8.8 Hz, 1H), 3.58 – 3.55 (m, 1H), 3.48 (ddd, *J* = 25.5, 19.6, 10.3 Hz, 4H), 3.39 – 3.35 (m, 1H), 3.33 – 3.29 (m, 1H).; **<sup>13</sup>C NMR** (176 MHz, CDCl<sub>3</sub>) δ 139.2, 138.6, 138.5, 138.3, 138.3, 137.9, 137.6, 128.5, 128.4, 128.4, 128.4, 128.3, 128.2, 128.1, 128.0, 128.0, 127.9, 127.8, 127.8, 127.8, 127.8, 127.7, 127.6, 127.6, 127.3, 127.2, 105.8 (d, <sup>1</sup>*J*<sub>C-F</sub> = 226.8 Hz, α-C<sub>1</sub>), 102.5, 84.9, 82.7, 79.8, 78.2 (d, <sup>2</sup>*J*<sub>C-F</sub> = 24.3 Hz), 78.0, 75.6, 75.6, 75.4, 75.2, 75.0, 74.8, 73.8, 73.3, 72.6 (d, <sup>3</sup>*J*<sub>C-F</sub> = 4.2 Hz), 69.0, 69.0, 67.1; **<sup>19</sup>F NMR** (471 MHz, CDCl<sub>3</sub>) δ -149.55 (dd, *J* = 53.4, 25.8 Hz); **IR** (thin film, cm<sup>-1</sup>): 1497, 1453, 1361, 1072, 1029, 1005, 908, 753, 731, 695, 665, 635, 619, 611; **HRMS (ESI-TOF)** (*m/z*): [M+NH<sub>4</sub>]<sup>+</sup> calcd for C<sub>61</sub>H<sub>67</sub>FNO<sub>10</sub> 992.4738, found 992.4733; [**α**]<sub>D</sub><sup>23.6</sup> = +23.1 (*c* = 0.23, CH<sub>2</sub>Cl<sub>2</sub>)

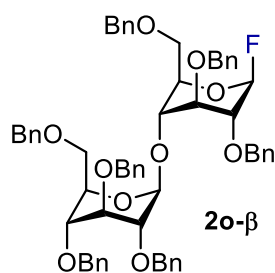

**2,3,6-Tris-O-(phenylmethyl)-4-O-[2,3,4,6-tetrakis-O-(phenylmethyl)-β-D-glucopyranosyl]-β-D-glucopyranosyl fluoride (major product).**

**<sup>1</sup>H NMR** (700 MHz, CDCl<sub>3</sub>) δ 7.37 (d, *J* = 5.2 Hz, 2H), 7.34 – 7.22 (m, 31H), 7.19 (d, *J* = 7.3 Hz, 2H), 5.25 (dd, *J* = 53.5, 6.5 Hz, 1H, β-C<sub>1</sub>-H), 5.05 (d, *J* = 11.4 Hz, 1H), 4.89 (d, *J* = 10.9 Hz, 1H), 4.81 (d, *J* = 10.6 Hz, 2H), 4.75 (dd, *J* = 17.7, 9.3 Hz, 4H), 4.69 (d, *J* = 11.2 Hz, 1H), 4.58 (dd, *J* = 17.0, 11.4 Hz, 2H), 4.50 (d, *J* = 7.9 Hz, 1H), 4.47 – 4.39 (m, 3H), 4.13 (t, *J* = 8.9 Hz, 1H), 3.84 (dd, *J* = 11.1, 3.4 Hz, 1H), 3.72 – 3.48 (m, 8H), 3.39 (t, *J* = 8.5 Hz, 1H), 3.30 (dd, *J* = 10.4, 4.0 Hz, 1H); **<sup>13</sup>C NMR** (176 MHz, CDCl<sub>3</sub>) δ 138.9, 138.5, 138.4, 138.4, 138.2, 137.8, 137.8, 128.4, 128.4, 128.4, 128.3, 128.3, 128.2, 128.1, 128.1, 127.9, 127.8, 127.8, 127.8, 127.8, 127.8, 127.7, 127.7, 127.6, 127.6, 127.5, 127.4, 127.3, 109.5 (d, <sup>1</sup>*J*<sub>C-F</sub> = 215.9 Hz, β-C<sub>1</sub>), 102.3, 84.9, 82.7, 81.3 (d, <sup>3</sup>*J*<sub>C-F</sub> = 10.3 Hz), 80.5 (d, <sup>2</sup>*J*<sub>C-F</sub> = 23.0 Hz), 77.9, 75.8, 75.6, 75.0, 74.9 (d, <sup>3</sup>*J*<sub>C-F</sub> = 3.7 Hz), 74.8, 74.7, 74.3, 73.4, 73.3, 68.9, 67.7; **<sup>19</sup>F NMR** (471 MHz, CDCl<sub>3</sub>) δ -135.75 (dd, *J* = 53.5, 12.3 Hz); **IR** (thin film, cm<sup>-1</sup>): 1497, 1453, 1361, 1072, 1029, 1005, 908, 753, 731, 695, 665, 635, 619, 611; **HRMS (ESI-TOF)** (*m/z*): [M+NH<sub>4</sub>]<sup>+</sup> calcd for C<sub>61</sub>H<sub>67</sub>FNO<sub>10</sub> 992.4738, found 992.4733; [α]<sub>D</sub><sup>23</sup> = +25.9 (*c* = 1.1, CH<sub>2</sub>Cl<sub>2</sub>)

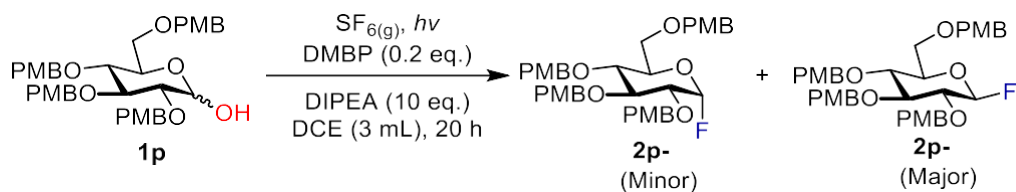

### Synthesis of 2,3,4,6-Tetrakis-*O*-[(4-methoxyphenyl)methyl]- $\beta$ -D-glucopyranosyl fluoride (2p)

The product was synthesized employing the general procedure. The product was purified by FCC (SiO<sub>2</sub>, pure hexanes  $\rightarrow$  30% EtOAc in hexanes) to afford **2p** as cloudy oil (47.2 mg,  $\alpha : \beta = 1 : 3.7$ ) in 71% yield

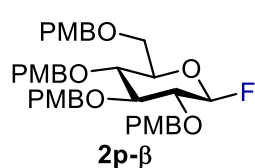

### 2,3,4,6-Tetrakis-*O*-[(4-methoxyphenyl)methyl]- $\beta$ -D-glucopyranosyl fluoride

(Major product, Isolated as  $\alpha : \beta = 1 : 9.4$  mixture).

**<sup>1</sup>H NMR** (500 MHz, CDCl<sub>3</sub>)  $\delta$  7.29 – 7.21 (m, 6H), 7.03 (d,  $J = 8.6$  Hz, 2H), 6.86 (dd,  $J = 8.6$ , 3.2 Hz, 6H), 6.80 (d,  $J = 8.6$  Hz, 2H), 5.21 (dd,  $J = 52.9$ , 6.7 Hz, 1H), 4.79 (dd,  $J = 19.8$ , 10.7 Hz, 2H), 4.70 (dd,  $J = 10.6$ , 1.4 Hz, 2H), 4.63 (d,  $J = 10.8$  Hz, 1H), 4.56 (d,  $J = 11.8$  Hz, 1H), 4.47 (d,  $J = 11.8$  Hz, 1H), 4.41 (d,  $J = 10.4$  Hz, 1H), 3.80 (s, 6H), 3.79 (s, 6H), 3.70 – 3.64 (m, 2H), 3.64 – 3.57 (m, 2H), 3.56 – 3.50 (m, 2H); **<sup>13</sup>C NMR** (126 MHz, CDCl<sub>3</sub>)  $\delta$  159.4, 159.3, 159.3, 159.2, 130.6, 130.1, 129.9, 129.8, 129.7, 129.6, 129.5, 113.9, 113.8, 109.9 (d,  $^1J_{C-F} = 215.9$  Hz), 83.2 (d,  $^3J_{C-F} = 11.4$  Hz), 81.2 (d,  $^2J_{C-F} = 21.4$  Hz), 75.1, 74.8 (d,  $^3J_{C-F} = 5.0$  Hz), 74.6, 74.1, 74.1, 73.2, 68.0, 55.3; **<sup>19</sup>F NMR** (471 MHz, CDCl<sub>3</sub>)  $\delta$  -138.15 (dd,  $J = 53.0$ , 11.9 Hz); **IR** (thin film, cm<sup>-1</sup>): 2907, 2835, 1611, 1585, 1512, 1463, 1441, 1359, 1302, 1244, 1172, 1083, 1031, 816, 758, 712, 637; **HRMS (ESI-TOF)** ( $m/z$ ): [M+Na]<sup>+</sup> calcd for C<sub>38</sub>H<sub>43</sub>FNao<sub>9</sub> 685.2792, found 685.2772; [ $\alpha$ ]<sub>D</sub><sup>24</sup> = +20.7 ( $c = 0.34$ , CH<sub>2</sub>Cl<sub>2</sub>).

#### d. Large Scale Batch Synthesis

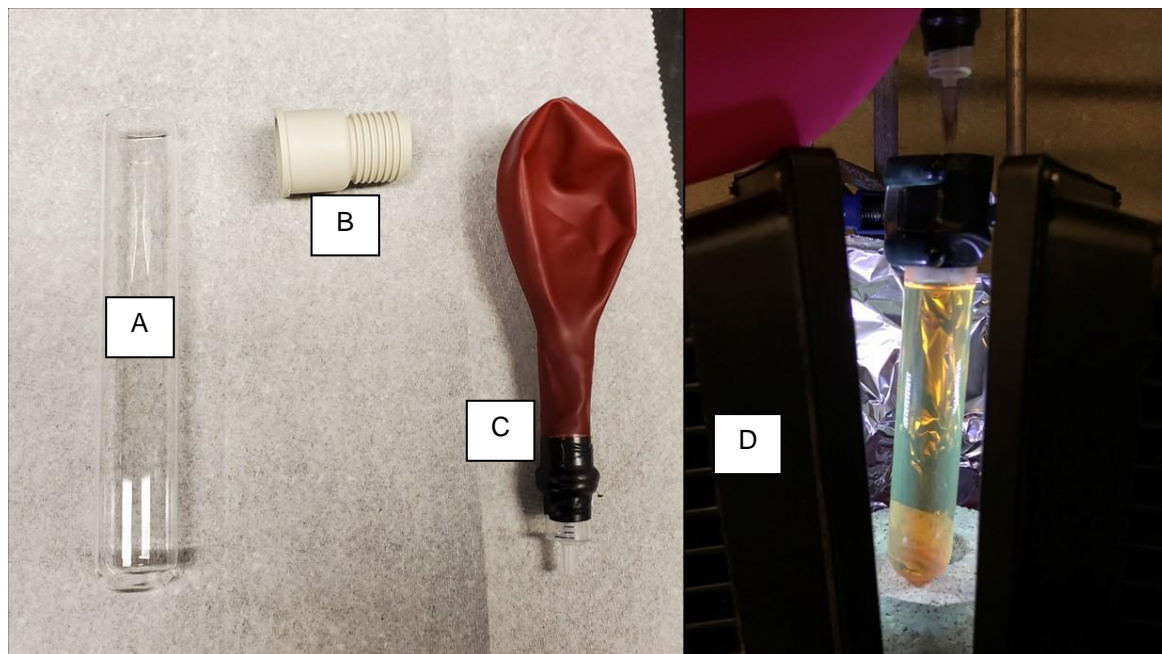

A. Fisherbrand™ Disposable Borosilicate Glass Tube (25x150mm)

B. Suba-Seal® septum (24/40 joint)

C. Norm-Ject™ Syringe (5 mL) + 2 Balloons

D. Waveform lighting realUV™ LED Flood Light (365nm)

An oven-dried glass tube was charged with 2,3,4,6-tetrakis-*O*-(phenylmethyl)-*D*-glucopyranoside **1g** (1.85 mmol, 1.0 equiv.), 4,4'-dimethoxybenzophenone (0.37 mmol, 0.2 equiv.), and a stir bar. After sealing the glass tube with a rubber septum, the tube was left under high vacuum for 5 minutes. Once the tube is taken off from the vacuum line, dichloroethane (42 mL) and DIPEA (18.5 mmol, 10 equiv.) were injected into the tube and the mixture was stirred until it became homogeneous. Then, the mixture was sparged with SF<sub>6</sub> filled balloon for 30 seconds. Once the sparging was done, the tube was irradiated with two UV-A Lamps until all starting material was consumed (166 h). The reaction mixture was worked up following the general procedure and purified by FCC (SiO<sub>2</sub>, pure hexanes → 20% EtOAc in hexanes) and 2,3,4,6-tetrakis-*O*-(phenylmethyl)-*D*-glucopyranosyl fluoride **2g** was obtained in 93% yield (0.93 gram,  $\alpha$  :  $\beta$  = 1 : 3.4).

## IV. Continuous Flow Synthesis

### a. Information of the flow equipment:

- a. NE-1010 Higher Pressure Syringe Pump (Serial No. 296019) – [Link to the website](#)
- b. 8 ml Stainless Steel Syringe with 1/16 inch SWAGELOK® (70-2267) – [Link to the website](#)
- c. Upchurch Scientific™ Low Pressure Y Connectors (P-512) – [Link to the website](#)
- d. Upchurch Scientific™ Micro-Metering and Micro-Splitter Valves: Needle Valves (P445) – [Link to the website](#)
- e. Upchurch Scientific NUT SHT ML LITETCH 1/16IN 10PK (LT115X) – [Link to the website](#)
- f. Upchurch Scientific™ Flangeless Fittings: Ferrules, PEEK (P250X) – [Link to the website](#)
- g. Upchurch Scientific™ Low-Pressure Unions: PEEK (P-702) – [Link to the website](#)
- h. Zaiput Flow Back Pressure Regulator (BPR-100) – [Link to the website](#)
- i. Waters Prep LC 4000 Preparative Chromatography System – [Link to the website](#)

## b. Small Scale Continuous Flow Setup with a Steel Syringe

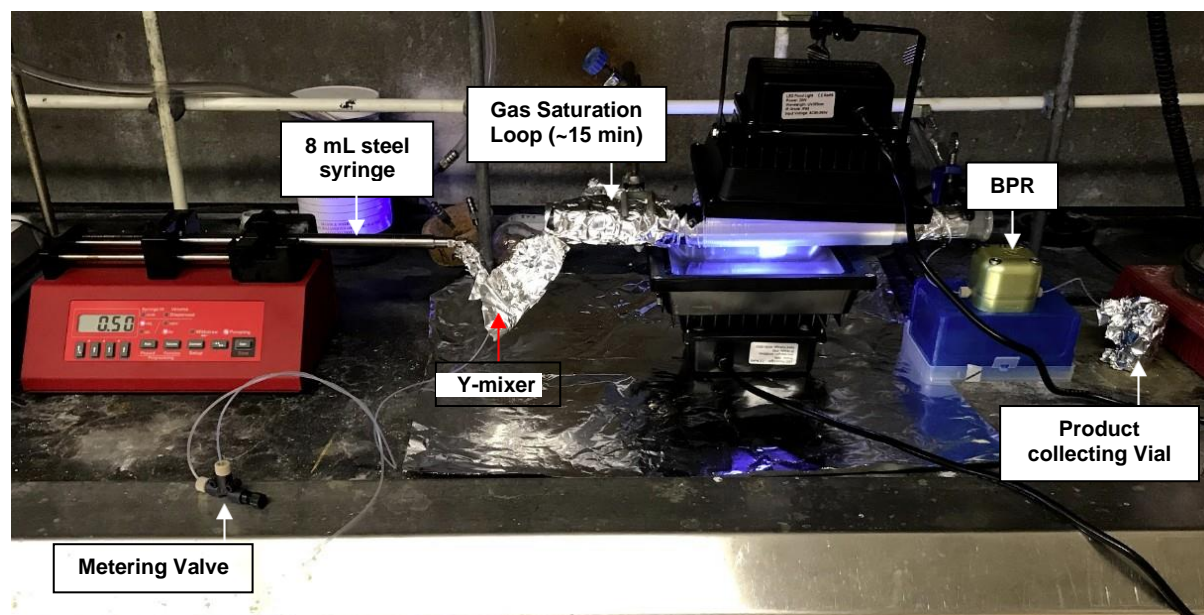

Into an oven dried vial, 2,3,4,6-tetrakis-*O*-(phenylmethyl)-*D*-glucopyranose **1g** (0.2 mmol, 1.0 equiv.) and 4,4'-dimethoxybenzophenone (0.04 mmol, 0.2 equiv.) were added. Followed by addition of 1,2-dichloroethane (6 mL) and DIPEA (2.0 mmol, 10 equiv.), the reaction mixture was sonicated until it became homogeneous. The prepared reaction mixture was transferred into 8 mL steel syringe, which was then connected to the flow system. The flow rate of syringe pump and SF<sub>6</sub> gas were adjusted for desired residence time of the reaction mixture inside the flow tube that was irradiated by UV-A Flood Lamp. From the collecting vial, 3.2 mL (equivalent to one standard-scale reaction) of the reaction mixture was collected and then analyzed.

**Table SI-7. Small Scale Synthesis of Glycosyl Fluoride with a Continuous Flow Setup**

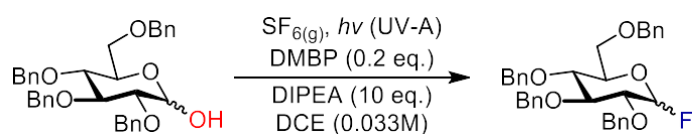

| Entry | BPR Pressure | Residence Time (h) | NMR Yield <sup>[a]</sup> | Yield <sup>[b]</sup> | BRSM |
|-------|--------------|--------------------|--------------------------|----------------------|------|
| 1     | 50 psi       | 9                  | 64%                      | 62% (33.7 mg)        | 84%  |
| 2     | 90 psi       | 8.5                | 81%                      | 78% (42.1 mg)        | 91%  |

[a] Determined by <sup>19</sup>F NMR with α,α,α-trifluorotoluene as an internal standard.

[b] Determined from 3.2 mL of the reaction mixture collected, which is equivalent to one standard reaction

**c. Large Scale Continuous Cyclic Flow Setup with a Prep-HPLC Pump**

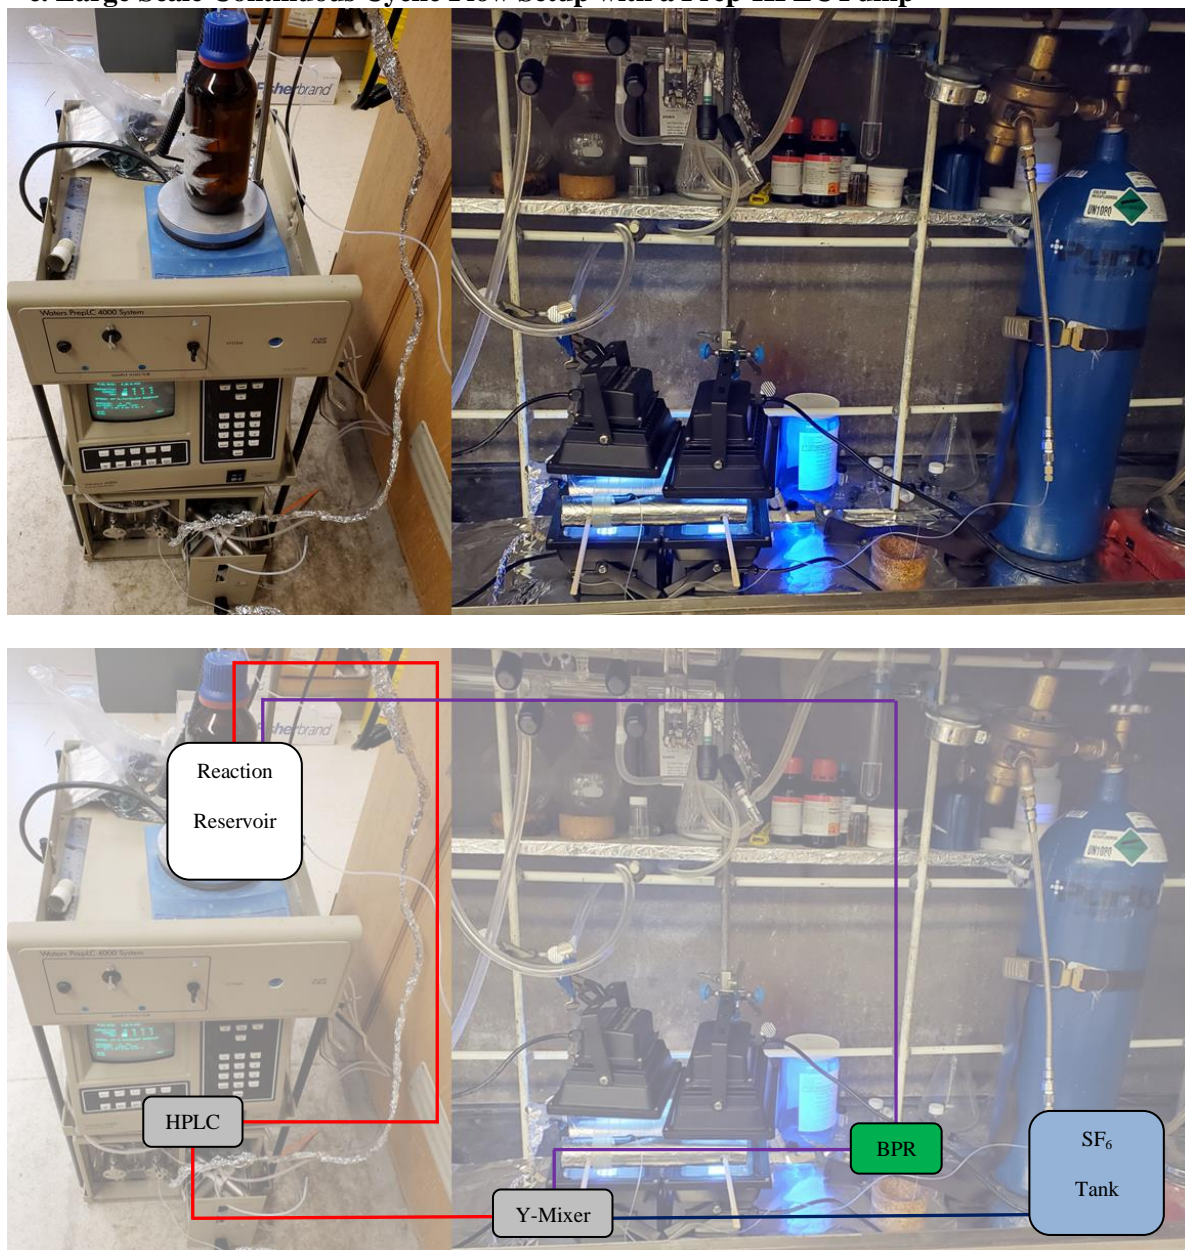

Number of UV-A lamps: 4

Length of flow tube irradiated by the lamps: approximately 100 feet

Pressure of BPR: 100 psi

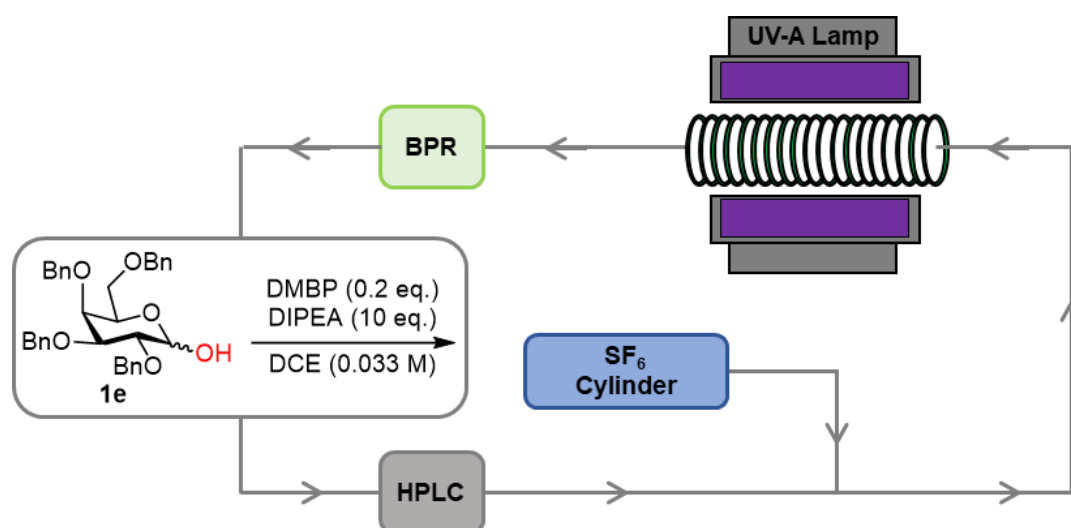

**Table SI-8. Large Scale Synthesis of Glycosyl Fluoride with a Continuous Flow Setup**

| Total Volume (mL) | Collected Volume (mL) | BPR Pressure | Cycling Time (h) | Yield        | BRSM          |
|-------------------|-----------------------|--------------|------------------|--------------|---------------|
| 475               | 455                   | 100 psi      | 120              | 93% (7.17 g) | 99.8% (0.5 g) |

Into a clean 500 mL glass bottle, 2,3,4,6-tetrakis-O-(phenylmethyl)-D-galactopyranose **1e** (14.8 mmol, 1.0 equiv.) and 4,4'-dimethoxybenzophenone (2.96 mmol, 0.2 equiv.) were dissolved into DCM (444 mL). After adding DIPEA (140.8 mmol, 10 equiv.), the mixture was shaken until it became homogeneous. The reservoir bottle containing the reaction mixture was then connected to HPLC pump and stirred with a magnetic stir bar while the reaction was running. After connecting flow tubes and priming, the HPLC pump was turned on and the flow rate was adjusted to 2 mL/min, which maintained the pressure at 114 psi with an occasional fluctuation of  $\pm 20$  psi. The regulator of SF<sub>6</sub> tank was adjusted between 120-130 psi for a steady flow of the reaction mixture. The reaction was cycled through the flow tube until almost all the starting material was consumed, which was monitored by TLC. After turning off the pump, 455 mL of the reaction mixture in the reservoir bottle was collected (corresponds to 7.66 g of starting material and 7.69 g of the product) and worked up following the standard procedure. Purification of crude mixture by FCC gave 7.17 g of 2,3,4,6-tetrakis-O-(phenylmethyl)-D-galactopyranosyl fluoride **2e** as product in 93% yield ( $\alpha : \beta = 1 : 2.7$ ), and 0.50 g of starting material was recovered (99.8% BRSM).

## V. UV-Vis Study of Photocatalysts

UV absorbance of photocatalysts was measured with UV-Vis detector (Shimadzu SPD-M20A) by injecting 20 microliter of 1 mM samples (0.01 mmol of photocatalyst in 10 mL of acetonitrile) into a reverse-phase HPLC (Shimadzu CTO-20A). All photocatalysts were eluted with 97% acetonitrile/ 3% water mixture except for Methylene Blue (30% acetonitrile/ 70% water).

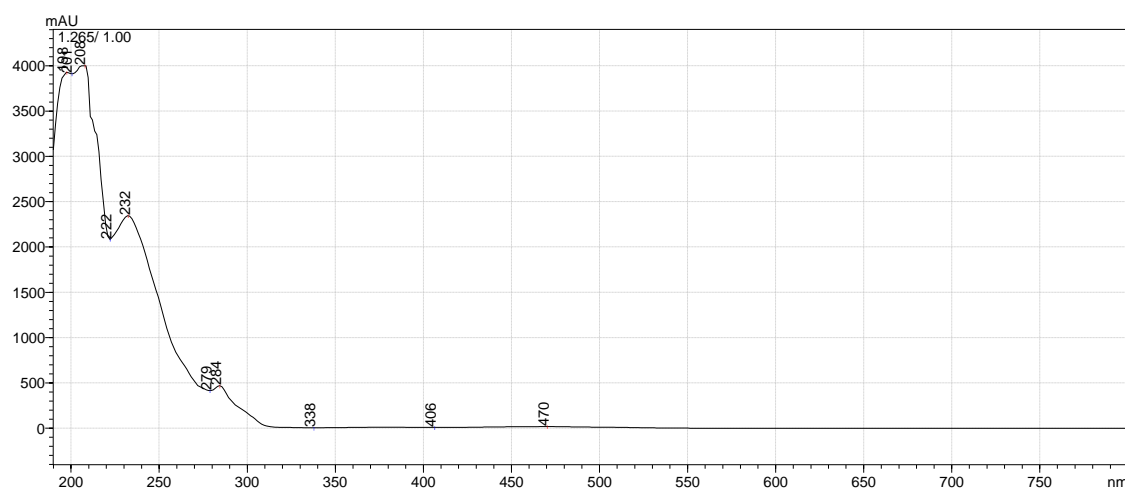

Figure SI-1. Eosin Y

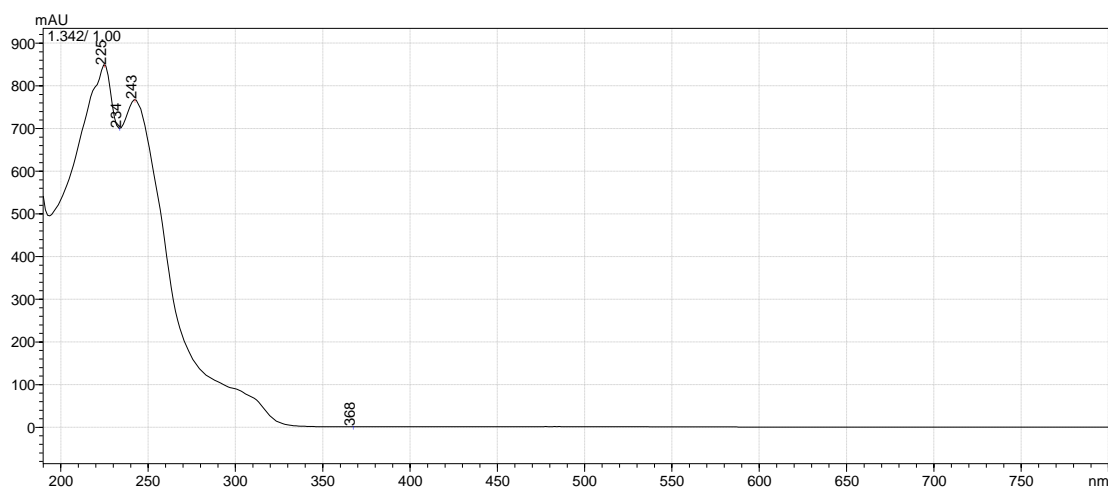

Figure SI-2. Rose Bengal

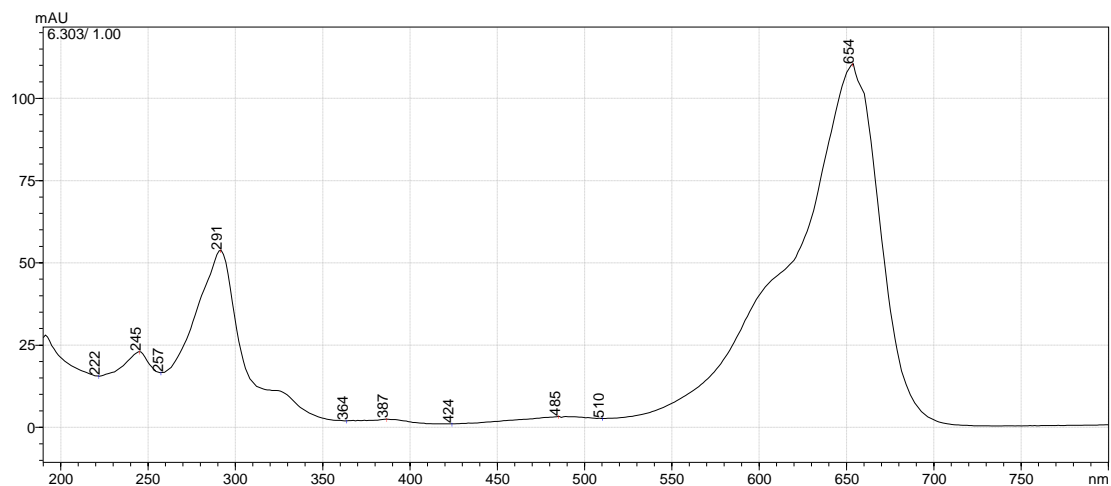

**Figure SI-3. Methylene Blue**

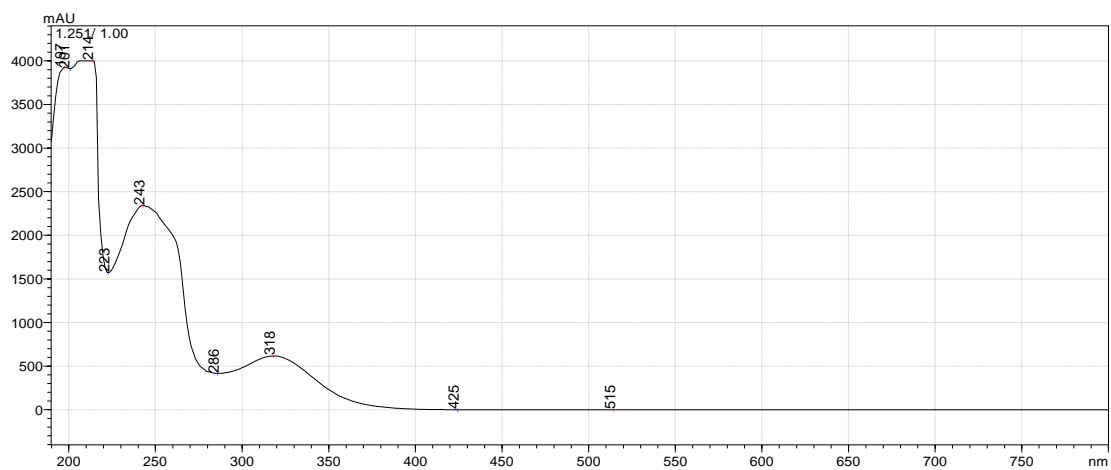

**Figure SI-4. N-Phenylphenothiazine**

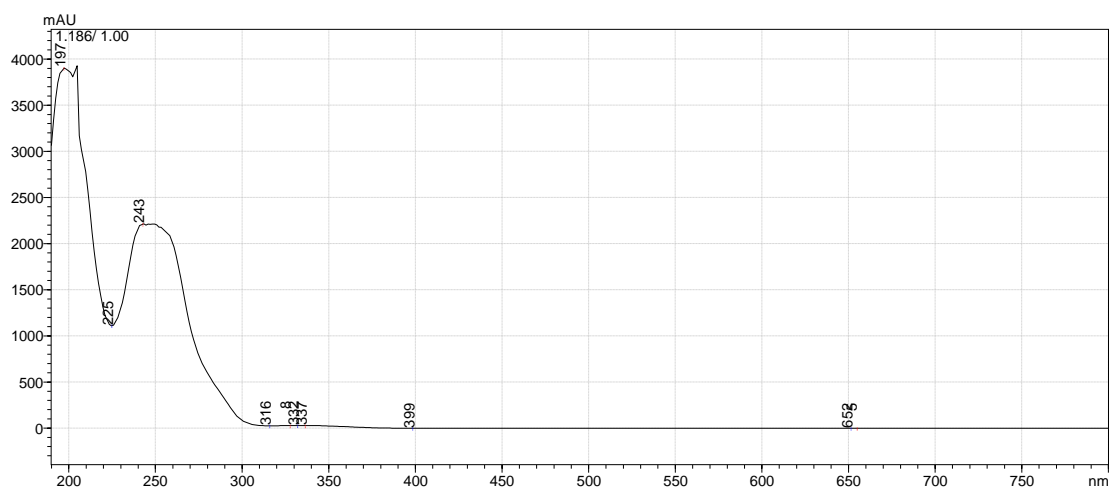

**Figure SI-5. Benzophenone**

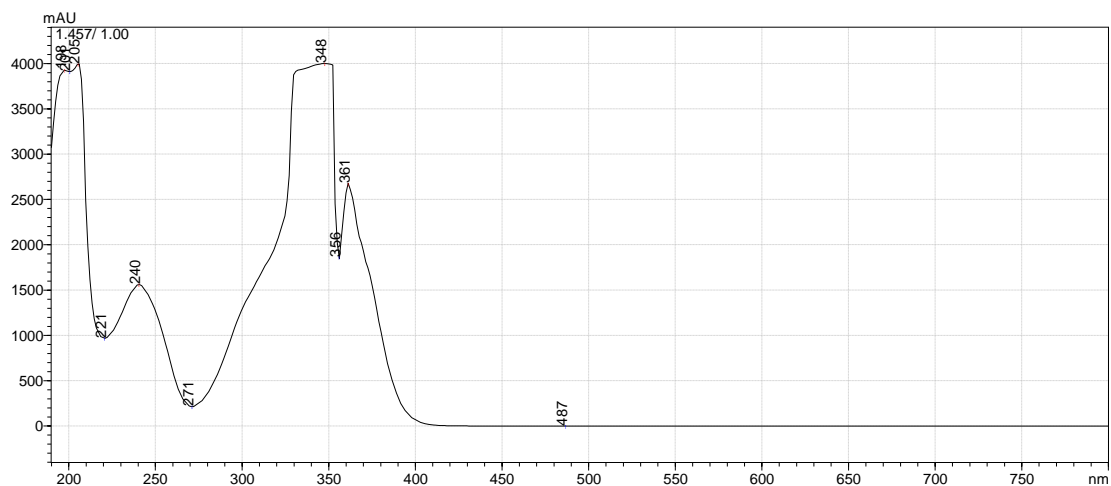

**Figure SI-6. Michler's Ketone**

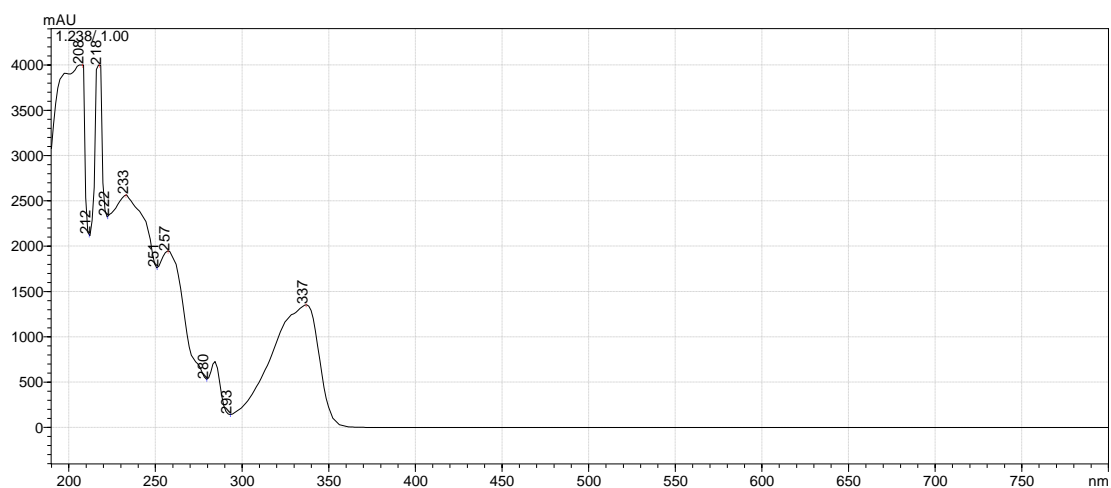

**Figure SI-7. Xanthone**

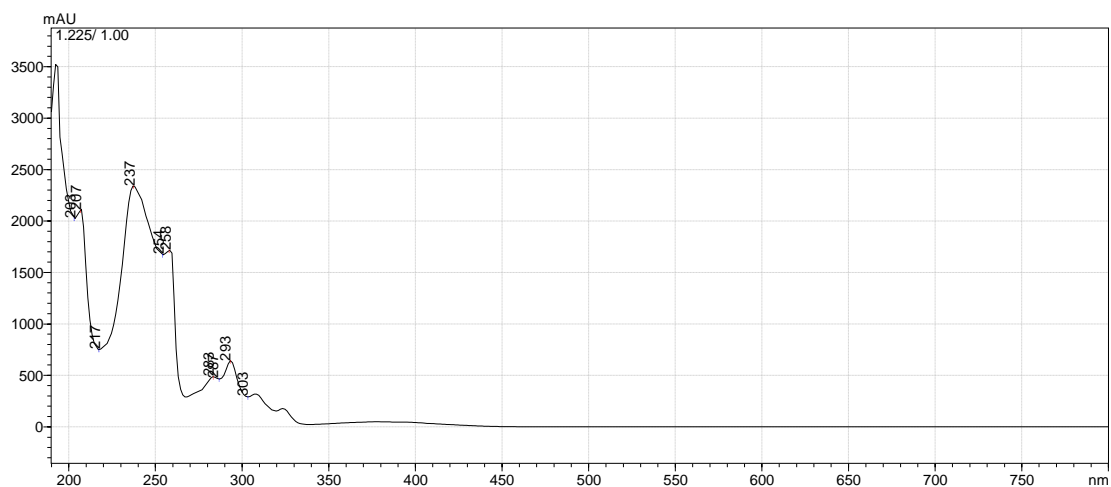

**Figure SI-8. 9-Fluorenone**

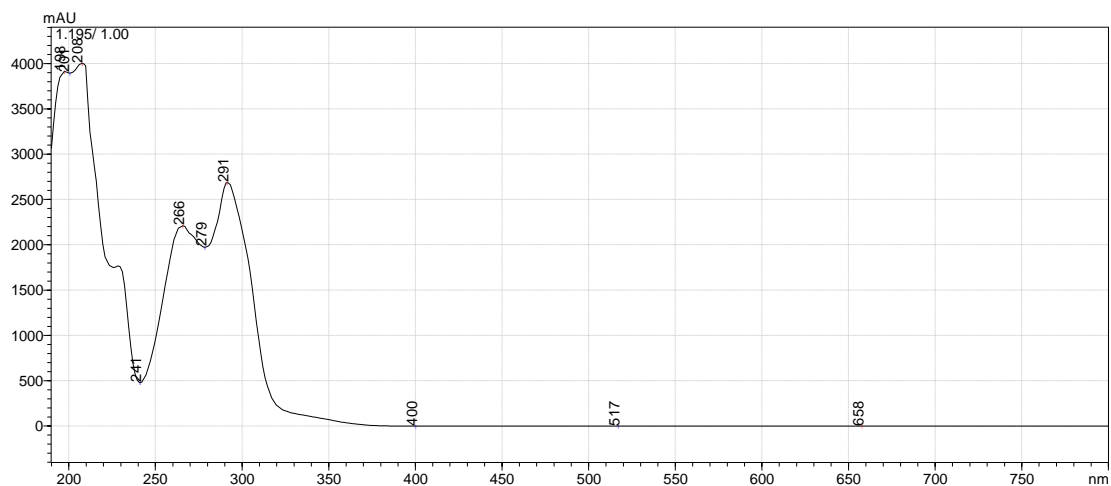

Figure SI-9. 4,4'-Dimethoxybenzophenone

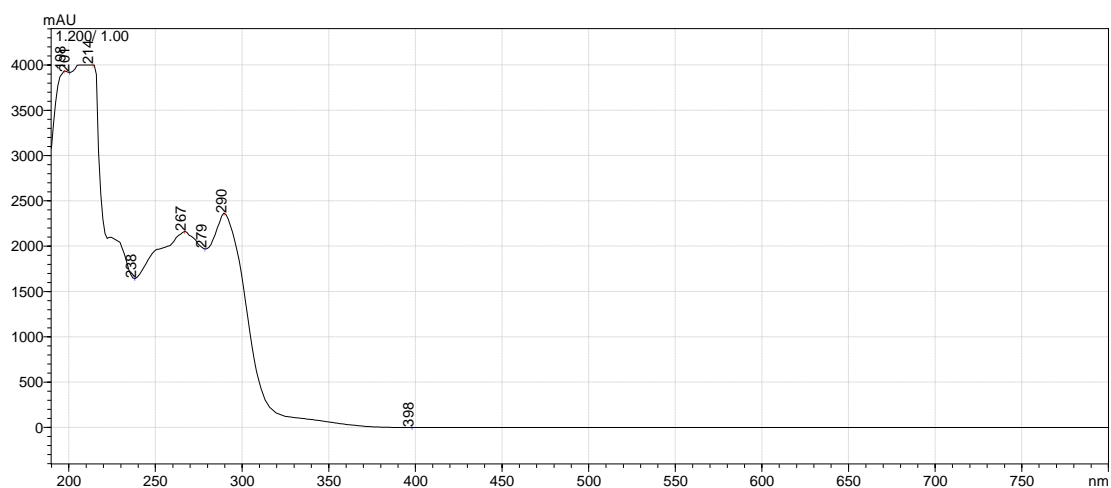

Figure SI-10. 4-Fluoro-4'-methoxybenzophenone

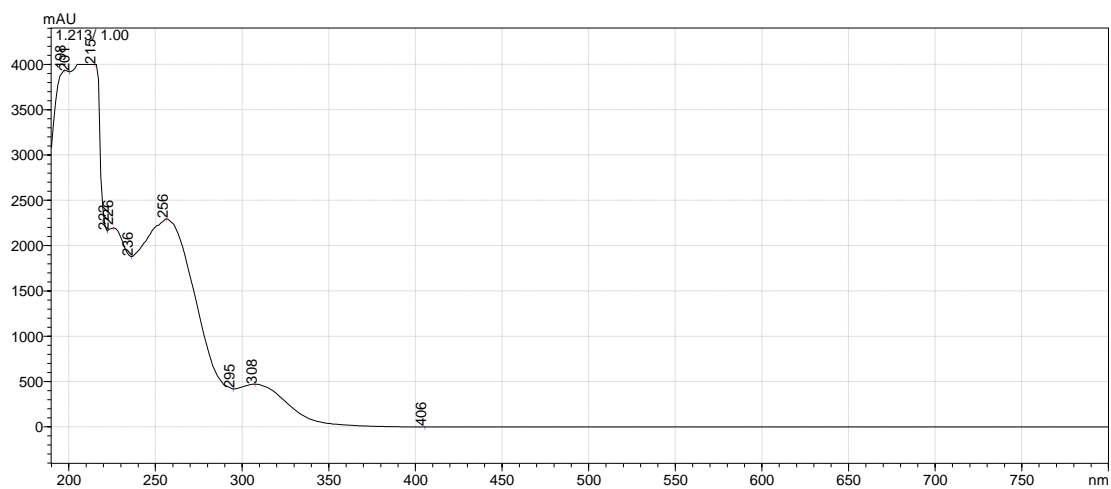

Figure SI-11. 4-Chloro-3'-methoxybenzophenone

## VI. Additional Experiment

### a. Control Experiment

Table SI-9. Result of Control Experiment

Reaction scheme showing the conversion of substrate **1** (0.1 mmol) to product **2** under the following conditions:  $\text{SF}_6(\text{g})$ ,  $h\nu$  (UV-A), 4,4'-Dimethoxybenzophenone (0.2 eq.), DIPEA (10 eq.), DCE (3 mL), 20 h.

| Entry | Substrate | Control     | Conversion |
|-------|-----------|-------------|------------|
| 1     | <b>1a</b> | No catalyst | 13%        |
| 2     | <b>1e</b> | No catalyst | 16%        |
| 3     | <b>1k</b> | No catalyst | 18%        |
| 4     | <b>1e</b> | No light    | —          |
| 5     | <b>1e</b> | No DIPEA    | —          |

### b. Light On/Off Experiment

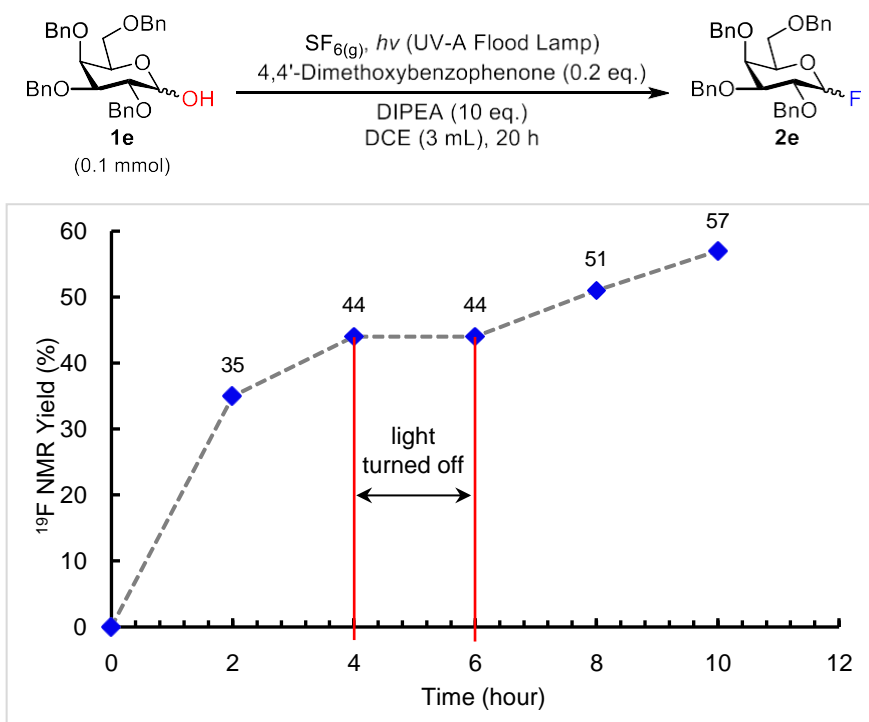

Figure SI-12. Light On/Off Experiment

The reaction was setup in a 1 dram vial following the general procedure outlined above. The yield was measured by  $^{19}\text{F}$  NMR with  $\alpha,\alpha,\alpha$ -trifluorotoluene as an internal standard. From the vial, 0.2 mL of reaction mixture was taken out every 2 h to monitor the progression of the reaction. After 4 h from setting up a reaction, the light was turned off for 2 h, and then turned back on. This result is implying that the reaction proceeds via a non-chain mechanism, that the active fluorinating reagent ( $\text{SF}_4$ ) is quickly consumed after it is generated *in situ*, does not build up in the reaction and requires light to be regenerated from  $\text{SF}_6$ .

### c. Identification of the Decomposed Photocatalyst

Identified side-products resulting from the catalyst decomposition that are typically observed in variable quantities while executing the standard fluorination protocol (24 h):

#### 4,4'-Dimethoxybenzhydrol<sup>17</sup>

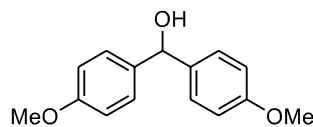

(Minor decomposed catalyst, isolated as 1:8.8 = minor:major mixture) <sup>1</sup>H NMR (500 MHz, CDCl<sub>3</sub>) δ 7.28 (d, *J* = 8.7 Hz, 4H, ArH), 6.87 (d, *J* = 8.7 Hz, 4H, ArH), 5.78 (s, 1H, Ar<sub>2</sub>CHOH), 3.79 (s, 6H, ArOCH<sub>3</sub>), 2.38 (s, 1H, Ar<sub>2</sub>CHOH); <sup>13</sup>C NMR (126 MHz, CDCl<sub>3</sub>) δ 159.0, 136.7, 127.7, 113.8, 75.4(Ar<sub>2</sub>CHOH), 55.27(ArOCH<sub>3</sub>).

#### 1,1,2,2-Tetrakis(*p*-methoxyphenyl)-1,2-ethanediol

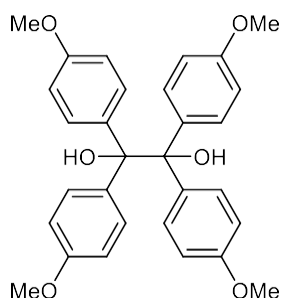

(Major decomposed catalyst, crystallized) <sup>1</sup>H NMR (700 MHz, CDCl<sub>3</sub>) δ 7.18 (d, *J* = 8.9 Hz, 8H), 6.70 (d, *J* = 8.9 Hz, 8H), 3.76 (s, 12H), 2.87 (br, 2H); <sup>13</sup>C NMR (176 MHz, cdcl<sub>3</sub>) δ 158.2, 136.7, 129.8, 112.5, 82.7 (Ar<sub>2</sub>COH), 55.1; HRMS (ESI-TOF) (*m/z*): [2M+Na]<sup>+</sup> calcd for C<sub>60</sub>H<sub>60</sub>NaO<sub>12</sub> 995.3976, found 995.3975.

#### X-ray Crystal Structure Analysis of 1,1,2,2-tetrakis(*p*-methoxyphenyl)-1,2-ethanediol

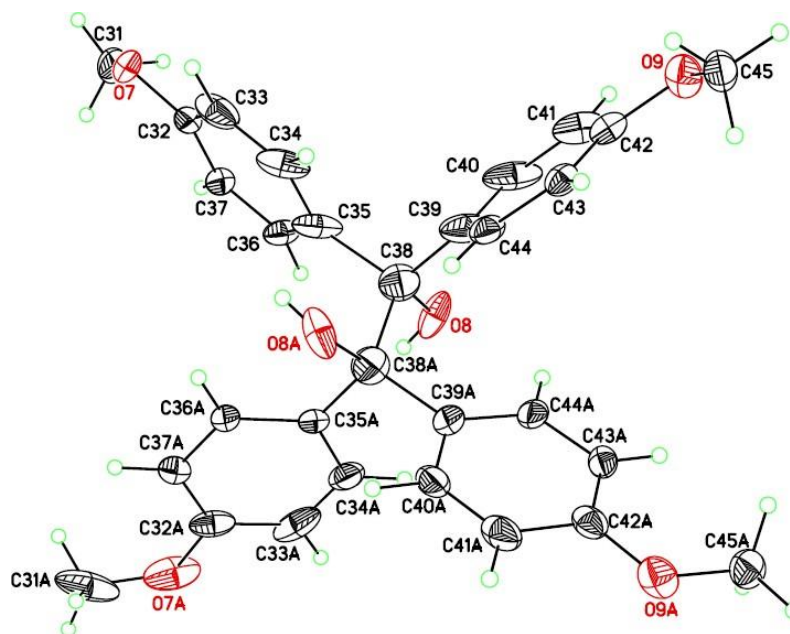

Ellipsoid contour %probability level = 50%

<sup>17</sup>Denegri, B.; Kronja, O. *J. Org. Chem.* **2007**, 72, 22, 8427-8433

## Structure Determination

Colorless blocks of 1,1,2,2-tetrakis(*p*-methoxyphenyl)-1,2-ethanediol were grown from a 20% ethyl acetate in hexanes solution of the compound at 25 deg. C. A crystal of dimensions 0.20 x 0.18 x 0.18 mm was mounted on a Rigaku AFC10K Saturn 944+ CCD-based X-ray diffractometer equipped with a low temperature device and Micromax-007HF Cu-target micro-focus rotating anode ( $\lambda = 1.54187$  Å) operated at 1.2 kW power (40 kV, 30 mA). The X-ray intensities were measured at 85(1) K with the detector placed at a distance 42.00 mm from the crystal. A total of 2028 images were collected with an oscillation width of  $1.0^\circ$  in  $\omega$ . The exposure times were 1 sec. for the low angle images, 4 sec. for high angle. Rigaku d\*trek images were exported to CrysAlisPro for processing and corrected for absorption. The integration of the data yielded a total of 74249 reflections to a maximum  $2\theta$  value of  $138.87^\circ$  of which 9005 were independent and 8968 were greater than  $2\sigma(I)$ . The final cell constants (Crystal Data and Structure Refinement) were based on the xyz centroids of 43167 reflections above  $10\sigma(I)$ . Analysis of the data showed negligible decay during data collection. The structure was solved and refined with the Bruker SHELXTL (version 2018/3) software package, using the space group  $P2_12_12_1$  with  $Z = 4$  for the formula  $C_{30}H_{30}O_6$ . All non-hydrogen atoms were refined anisotropically with the hydrogen atoms placed in a combination of refined and idealized positions. The structure was refined as a two-component inversion twin with the asymmetric unit consisting of four independent half-molecules located on two-fold rotation axes. Full matrix least-squares refinement based on  $F^2$  converged at  $R1 = 0.0578$  and  $wR2 = 0.1586$  [based on  $I > 2\sigma(I)$ ],  $R1 = 0.0580$  and  $wR2 = 0.1592$  for all data. Additional details are presented in Table 1 and are given as Supporting Information in a CIF file. Acknowledgement is made for funding from NSF grant CHE-0840456 for X-ray instrumentation.

G.M. Sheldrick (2015) "Crystal structure refinement with SHELXL", Acta Cryst., C71, 3-8 (Open Access).  
CrystalClear Expert 2.0 r16, Rigaku Americas and Rigaku Corporation (2014), Rigaku Americas, 9009, TX, USA 77381-5209, Rigaku Tokyo, 196-8666, Japan.

CrysAlisPro 1.171.38.41 (Rigaku Oxford Diffraction, 2015).

**Table SI-10. Crystal Data and Structure Refinement**

|                                   |                                                                                                                        |
|-----------------------------------|------------------------------------------------------------------------------------------------------------------------|
| Empirical formula                 | C <sub>30</sub> H <sub>30</sub> O <sub>6</sub>                                                                         |
| Formula weight                    | 486.54                                                                                                                 |
| Temperature                       | 85(2) K                                                                                                                |
| Wavelength                        | 1.54184 Å                                                                                                              |
| Crystal system, space group       | Orthorhombic, P2(1)2(1)2                                                                                               |
| Unit cell dimensions              | a = 16.08990(10) Å    alpha = 90 deg.<br>b = 16.48600(10) Å    beta = 90 deg.<br>c = 18.20870(10) Å    gamma = 90 deg. |
| Volume                            | 4830.01(5) Å <sup>3</sup>                                                                                              |
| Z, Calculated density             | 8, 1.338 Mg/m <sup>3</sup>                                                                                             |
| Absorption coefficient            | 0.752 mm <sup>-1</sup>                                                                                                 |
| F(000)                            | 2064                                                                                                                   |
| Crystal size                      | 0.200 x 0.180 x 0.180 mm                                                                                               |
| Theta range for data collection   | 2.427 to 69.435 deg.                                                                                                   |
| Limiting indices                  | -19 ≤ h ≤ 18, -20 ≤ k ≤ 19, -22 ≤ l ≤ 21                                                                               |
| Reflections collected / unique    | 74249 / 9005 [R(int) = 0.0566]                                                                                         |
| Completeness to theta = 67.684    | 100.0 %                                                                                                                |
| Absorption correction             | Semi-empirical from equivalents                                                                                        |
| Max. and min. transmission        | 1.00000 and 0.92602                                                                                                    |
| Refinement method                 | Full-matrix least-squares on F <sup>2</sup>                                                                            |
| Data / restraints / parameters    | 9005 / 2 / 674                                                                                                         |
| Goodness-of-fit on F <sup>2</sup> | 0.998                                                                                                                  |
| Final R indices [I > 2σ(I)]       | R1 = 0.0578, wR2 = 0.1586                                                                                              |
| R indices (all data)              | R1 = 0.0580, wR2 = 0.1592                                                                                              |
| Absolute structure parameter      | 0.4(2)                                                                                                                 |
| Extinction coefficient            | 0.00079(15)                                                                                                            |
| Largest diff. peak and hole       | 1.596 and -0.522 e.Å <sup>-3</sup>                                                                                     |

**Table SI-11. Atomic coordinates (  $\times 10^4$ ) and equivalent isotropic displacement parameters ( $\text{\AA}^2 \times 10^3$ )**

U(eq) is defined as one third of the trace of the orthogonalized  $U_{ij}$  tensor.

|       | x        | y        | z        | U(eq) |
|-------|----------|----------|----------|-------|
| O(1)  | 7945(2)  | 6480(2)  | 10835(1) | 27(1) |
| O(2)  | 9153(2)  | 4250(2)  | 8353(2)  | 31(1) |
| O(3)  | 8529(2)  | 6839(2)  | 5782(2)  | 42(1) |
| O(4)  | 6862(2)  | 6947(2)  | 7257(1)  | 25(1) |
| O(5)  | 4230(2)  | 5795(2)  | 4931(1)  | 24(1) |
| O(6)  | 6611(2)  | 6383(2)  | 2207(2)  | 32(1) |
| O(7)  | 6331(3)  | 7790(2)  | 9422(2)  | 54(1) |
| O(8)  | 5937(2)  | 10634(2) | 7040(2)  | 36(1) |
| O(9)  | 6672(2)  | 8471(2)  | 4366(2)  | 35(1) |
| O(10) | 7983(2)  | 8326(2)  | 2982(2)  | 28(1) |
| O(11) | 10745(2) | 9192(2)  | 643(1)   | 22(1) |
| O(12) | 8370(2)  | 8194(2)  | -1959(2) | 27(1) |
| C(1)  | 8379(3)  | 6950(2)  | 11366(2) | 27(1) |
| C(2)  | 8389(2)  | 6186(2)  | 10251(2) | 20(1) |
| C(3)  | 9247(2)  | 6233(2)  | 10188(2) | 22(1) |
| C(4)  | 9638(2)  | 5894(2)  | 9581(2)  | 26(1) |
| C(5)  | 9184(3)  | 5509(2)  | 9030(2)  | 27(1) |
| C(6)  | 8320(3)  | 5483(3)  | 9106(2)  | 30(1) |
| C(7)  | 7927(2)  | 5812(2)  | 9703(2)  | 26(1) |
| C(8)  | 9513(3)  | 5061(3)  | 8354(2)  | 33(1) |
| C(9)  | 9269(3)  | 5553(3)  | 7654(2)  | 31(1) |
| C(10) | 9351(2)  | 6397(3)  | 7592(2)  | 30(1) |
| C(11) | 9108(2)  | 6810(3)  | 6965(2)  | 29(1) |
| C(12) | 8762(2)  | 6384(3)  | 6377(2)  | 26(1) |
| C(13) | 8667(2)  | 5550(3)  | 6436(2)  | 27(1) |
| C(14) | 8925(3)  | 5149(3)  | 7066(2)  | 30(1) |
| C(15) | 8034(3)  | 6457(4)  | 5251(3)  | 53(1) |
| C(16) | 7210(2)  | 6493(2)  | 7846(2)  | 23(1) |
| C(17) | 6450(2)  | 6530(2)  | 6725(2)  | 18(1) |
| C(18) | 6376(2)  | 5692(2)  | 6695(2)  | 20(1) |
| C(19) | 5942(2)  | 5338(2)  | 6118(2)  | 22(1) |
| C(20) | 5576(2)  | 5794(2)  | 5565(2)  | 22(1) |
| C(21) | 5667(2)  | 6638(2)  | 5606(2)  | 26(1) |
| C(22) | 6088(2)  | 7004(2)  | 6173(2)  | 24(1) |
| C(23) | 5065(2)  | 5471(2)  | 4914(2)  | 22(1) |
| C(24) | 5483(2)  | 5731(2)  | 4190(2)  | 23(1) |
| C(25) | 6343(2)  | 5703(2)  | 4084(2)  | 24(1) |
| C(26) | 6702(2)  | 5925(2)  | 3421(2)  | 25(1) |
| C(27) | 6210(2)  | 6179(2)  | 2844(2)  | 22(1) |
| C(28) | 5354(2)  | 6213(2)  | 2930(2)  | 23(1) |
| C(29) | 5006(2)  | 5983(2)  | 3601(2)  | 22(1) |
| C(30) | 6106(3)  | 6679(3)  | 1618(2)  | 36(1) |
| C(31) | 6876(4)  | 8093(4)  | 9976(3)  | 65(2) |
| C(32) | 6118(3)  | 8318(3)  | 8877(2)  | 33(1) |
| C(33) | 5725(3)  | 7984(3)  | 8264(3)  | 43(1) |
| C(34) | 5498(3)  | 8463(3)  | 7676(3)  | 39(1) |

|       |         |         |          |       |
|-------|---------|---------|----------|-------|
| C(35) | 5631(3) | 9294(3) | 7678(3)  | 38(1) |
| C(36) | 5990(3) | 9620(2) | 8309(2)  | 27(1) |
| C(37) | 6244(2) | 9149(2) | 8903(2)  | 24(1) |
| C(38) | 5476(3) | 9872(3) | 6986(3)  | 38(1) |
| C(39) | 5705(4) | 9411(3) | 6295(3)  | 43(1) |
| C(40) | 6557(3) | 9416(3) | 6134(3)  | 47(1) |
| C(41) | 6852(3) | 9095(3) | 5507(3)  | 40(1) |
| C(42) | 6306(3) | 8754(2) | 4993(2)  | 27(1) |
| C(43) | 5464(2) | 8729(2) | 5140(2)  | 23(1) |
| C(44) | 5169(3) | 9044(2) | 5794(2)  | 28(1) |
| C(45) | 6141(3) | 8106(3) | 3832(2)  | 32(1) |
| C(46) | 8388(3) | 7891(3) | 3553(2)  | 33(1) |
| C(47) | 8477(2) | 8663(2) | 2454(2)  | 19(1) |
| C(48) | 9335(2) | 8714(2) | 2490(2)  | 19(1) |
| C(49) | 9776(2) | 9039(2) | 1901(2)  | 20(1) |
| C(50) | 9384(2) | 9292(2) | 1265(2)  | 24(1) |
| C(51) | 8516(2) | 9266(2) | 1249(2)  | 24(1) |
| C(52) | 8062(2) | 8961(2) | 1836(2)  | 23(1) |
| C(53) | 9913(2) | 9529(2) | 584(2)   | 24(1) |
| C(54) | 9459(2) | 9232(2) | -111(2)  | 26(1) |
| C(55) | 9461(2) | 8402(2) | -240(2)  | 26(1) |
| C(56) | 9081(2) | 8078(2) | -848(2)  | 25(1) |
| C(57) | 8693(2) | 8579(2) | -1357(2) | 20(1) |
| C(58) | 8655(2) | 9412(2) | -1235(2) | 22(1) |
| C(59) | 9035(2) | 9725(2) | -610(2)  | 24(1) |
| C(60) | 7932(2) | 8672(2) | -2487(2) | 24(1) |

---

**Table SI-12. Bond lengths [Å] and angles [deg]**

---

|              |          |
|--------------|----------|
| O(1)-C(2)    | 1.370(4) |
| O(1)-C(1)    | 1.422(5) |
| O(2)-C(8)    | 1.457(5) |
| O(2)-H(2A)   | 0.83(3)  |
| O(2)-H(2B)   | 0.84(3)  |
| O(3)-C(12)   | 1.370(5) |
| O(3)-C(15)   | 1.403(6) |
| O(4)-C(17)   | 1.360(4) |
| O(4)-C(16)   | 1.423(4) |
| O(5)-C(23)   | 1.446(4) |
| O(5)-H(5)    | 0.87(6)  |
| O(6)-C(27)   | 1.370(4) |
| O(6)-C(30)   | 1.431(5) |
| O(7)-C(32)   | 1.364(5) |
| O(7)-C(31)   | 1.428(8) |
| O(8)-C(38)   | 1.462(5) |
| O(8)-H(8)    | 0.81(6)  |
| O(9)-C(42)   | 1.367(5) |
| O(9)-C(45)   | 1.428(5) |
| O(10)-C(47)  | 1.366(4) |
| O(10)-C(46)  | 1.422(5) |
| O(11)-C(53)  | 1.454(5) |
| O(11)-H(11)  | 0.86(5)  |
| O(12)-C(57)  | 1.370(4) |
| O(12)-C(60)  | 1.428(4) |
| C(1)-H(1A)   | 0.9800   |
| C(1)-H(1B)   | 0.9800   |
| C(1)-H(1C)   | 0.9800   |
| C(2)-C(3)    | 1.387(5) |
| C(2)-C(7)    | 1.388(5) |
| C(3)-C(4)    | 1.390(5) |
| C(3)-H(3)    | 0.9500   |
| C(4)-C(5)    | 1.395(6) |
| C(4)-H(4)    | 0.9500   |
| C(5)-C(6)    | 1.398(6) |
| C(5)-C(8)    | 1.529(6) |
| C(6)-C(7)    | 1.370(6) |
| C(6)-H(6)    | 0.9500   |
| C(7)-H(7)    | 0.9500   |
| C(8)-C(9)    | 1.562(6) |
| C(8)-C(8)#1  | 1.579(8) |
| C(9)-C(14)   | 1.377(6) |
| C(9)-C(10)   | 1.403(6) |
| C(10)-C(11)  | 1.385(6) |
| C(10)-H(10)  | 0.9500   |
| C(11)-C(12)  | 1.397(6) |
| C(11)-H(11A) | 0.9500   |
| C(12)-C(13)  | 1.387(6) |
| C(13)-C(14)  | 1.388(6) |

|               |          |
|---------------|----------|
| C(13)-H(13)   | 0.9500   |
| C(14)-H(14)   | 0.9500   |
| C(15)-H(15A)  | 0.9800   |
| C(15)-H(15B)  | 0.9800   |
| C(15)-H(15C)  | 0.9800   |
| C(16)-H(16A)  | 0.9800   |
| C(16)-H(16B)  | 0.9800   |
| C(16)-H(16C)  | 0.9800   |
| C(17)-C(18)   | 1.389(5) |
| C(17)-C(22)   | 1.401(5) |
| C(18)-C(19)   | 1.390(5) |
| C(18)-H(18)   | 0.9500   |
| C(19)-C(20)   | 1.387(5) |
| C(19)-H(19)   | 0.9500   |
| C(20)-C(21)   | 1.401(5) |
| C(20)-C(23)   | 1.538(5) |
| C(21)-C(22)   | 1.375(5) |
| C(21)-H(21)   | 0.9500   |
| C(22)-H(22)   | 0.9500   |
| C(23)-C(24)   | 1.542(5) |
| C(23)-C(23)#2 | 1.566(7) |
| C(24)-C(29)   | 1.383(5) |
| C(24)-C(25)   | 1.397(6) |
| C(25)-C(26)   | 1.389(5) |
| C(25)-H(25)   | 0.9500   |
| C(26)-C(27)   | 1.380(5) |
| C(26)-H(26)   | 0.9500   |
| C(27)-C(28)   | 1.387(6) |
| C(28)-C(29)   | 1.397(5) |
| C(28)-H(28)   | 0.9500   |
| C(29)-H(29)   | 0.9500   |
| C(30)-H(30A)  | 0.9800   |
| C(30)-H(30B)  | 0.9800   |
| C(30)-H(30C)  | 0.9800   |
| C(31)-H(31A)  | 0.9800   |
| C(31)-H(31B)  | 0.9800   |
| C(31)-H(31C)  | 0.9800   |
| C(32)-C(37)   | 1.387(6) |
| C(32)-C(33)   | 1.396(7) |
| C(33)-C(34)   | 1.379(7) |
| C(33)-H(33)   | 0.9500   |
| C(34)-C(35)   | 1.387(7) |
| C(34)-H(34)   | 0.9500   |
| C(35)-C(36)   | 1.394(5) |
| C(35)-C(38)   | 1.598(7) |
| C(36)-C(37)   | 1.393(5) |
| C(36)-H(36)   | 0.9500   |
| C(37)-H(37)   | 0.9500   |
| C(38)-C(39)   | 1.516(6) |
| C(38)-C(38)#3 | 1.589(9) |
| C(39)-C(44)   | 1.394(6) |

|                  |          |
|------------------|----------|
| C(39)-C(40)      | 1.402(8) |
| C(40)-C(41)      | 1.345(7) |
| C(40)-H(40)      | 0.9500   |
| C(41)-C(42)      | 1.401(6) |
| C(41)-H(41)      | 0.9500   |
| C(42)-C(43)      | 1.381(6) |
| C(43)-C(44)      | 1.383(5) |
| C(43)-H(43)      | 0.9500   |
| C(44)-H(44)      | 0.9500   |
| C(45)-H(45A)     | 0.9800   |
| C(45)-H(45B)     | 0.9800   |
| C(45)-H(45C)     | 0.9800   |
| C(46)-H(46A)     | 0.9800   |
| C(46)-H(46B)     | 0.9800   |
| C(46)-H(46C)     | 0.9800   |
| C(47)-C(48)      | 1.385(5) |
| C(47)-C(52)      | 1.398(5) |
| C(48)-C(49)      | 1.393(5) |
| C(48)-H(48)      | 0.9500   |
| C(49)-C(50)      | 1.383(5) |
| C(49)-H(49)      | 0.9500   |
| C(50)-C(51)      | 1.397(6) |
| C(50)-C(53)      | 1.555(5) |
| C(51)-C(52)      | 1.389(5) |
| C(51)-H(51)      | 0.9500   |
| C(52)-H(52)      | 0.9500   |
| C(53)-C(54)      | 1.540(5) |
| C(53)-C(53)#4    | 1.579(7) |
| C(54)-C(55)      | 1.388(6) |
| C(54)-C(59)      | 1.398(6) |
| C(55)-C(56)      | 1.374(6) |
| C(55)-H(55)      | 0.9500   |
| C(56)-C(57)      | 1.389(5) |
| C(56)-H(56)      | 0.9500   |
| C(57)-C(58)      | 1.393(5) |
| C(58)-C(59)      | 1.392(5) |
| C(58)-H(58)      | 0.9500   |
| C(59)-H(59)      | 0.9500   |
| C(60)-H(60A)     | 0.9800   |
| C(60)-H(60B)     | 0.9800   |
| C(60)-H(60C)     | 0.9800   |
|                  |          |
| C(2)-O(1)-C(1)   | 117.7(3) |
| C(8)-O(2)-H(2A)  | 108(9)   |
| C(8)-O(2)-H(2B)  | 108(8)   |
| C(12)-O(3)-C(15) | 117.0(4) |
| C(17)-O(4)-C(16) | 117.6(3) |
| C(23)-O(5)-H(5)  | 110(3)   |
| C(27)-O(6)-C(30) | 116.8(3) |
| C(32)-O(7)-C(31) | 116.4(4) |
| C(38)-O(8)-H(8)  | 110(5)   |

|                    |          |
|--------------------|----------|
| C(42)-O(9)-C(45)   | 117.0(3) |
| C(47)-O(10)-C(46)  | 117.0(3) |
| C(53)-O(11)-H(11)  | 106(3)   |
| C(57)-O(12)-C(60)  | 118.1(3) |
| O(1)-C(1)-H(1A)    | 109.5    |
| O(1)-C(1)-H(1B)    | 109.5    |
| H(1A)-C(1)-H(1B)   | 109.5    |
| O(1)-C(1)-H(1C)    | 109.5    |
| H(1A)-C(1)-H(1C)   | 109.5    |
| H(1B)-C(1)-H(1C)   | 109.5    |
| O(1)-C(2)-C(3)     | 124.3(3) |
| O(1)-C(2)-C(7)     | 115.8(3) |
| C(3)-C(2)-C(7)     | 119.9(3) |
| C(2)-C(3)-C(4)     | 119.6(3) |
| C(2)-C(3)-H(3)     | 120.2    |
| C(4)-C(3)-H(3)     | 120.2    |
| C(3)-C(4)-C(5)     | 121.2(4) |
| C(3)-C(4)-H(4)     | 119.4    |
| C(5)-C(4)-H(4)     | 119.4    |
| C(4)-C(5)-C(6)     | 117.6(4) |
| C(4)-C(5)-C(8)     | 128.1(4) |
| C(6)-C(5)-C(8)     | 114.2(4) |
| C(7)-C(6)-C(5)     | 121.7(4) |
| C(7)-C(6)-H(6)     | 119.1    |
| C(5)-C(6)-H(6)     | 119.1    |
| C(6)-C(7)-C(2)     | 119.9(4) |
| C(6)-C(7)-H(7)     | 120.0    |
| C(2)-C(7)-H(7)     | 120.0    |
| O(2)-C(8)-C(5)     | 107.8(3) |
| O(2)-C(8)-C(9)     | 112.0(3) |
| C(5)-C(8)-C(9)     | 108.6(3) |
| O(2)-C(8)-C(8)#1   | 106.2(4) |
| C(5)-C(8)-C(8)#1   | 113.9(3) |
| C(9)-C(8)-C(8)#1   | 108.4(3) |
| C(14)-C(9)-C(10)   | 117.1(4) |
| C(14)-C(9)-C(8)    | 119.0(4) |
| C(10)-C(9)-C(8)    | 123.9(4) |
| C(11)-C(10)-C(9)   | 121.8(4) |
| C(11)-C(10)-H(10)  | 119.1    |
| C(9)-C(10)-H(10)   | 119.1    |
| C(10)-C(11)-C(12)  | 119.9(4) |
| C(10)-C(11)-H(11A) | 120.1    |
| C(12)-C(11)-H(11A) | 120.1    |
| O(3)-C(12)-C(13)   | 125.0(4) |
| O(3)-C(12)-C(11)   | 116.1(4) |
| C(13)-C(12)-C(11)  | 118.9(4) |
| C(12)-C(13)-C(14)  | 120.2(4) |
| C(12)-C(13)-H(13)  | 119.9    |
| C(14)-C(13)-H(13)  | 119.9    |
| C(9)-C(14)-C(13)   | 122.2(4) |
| C(9)-C(14)-H(14)   | 118.9    |

|                     |          |
|---------------------|----------|
| C(13)-C(14)-H(14)   | 118.9    |
| O(3)-C(15)-H(15A)   | 109.5    |
| O(3)-C(15)-H(15B)   | 109.5    |
| H(15A)-C(15)-H(15B) | 109.5    |
| O(3)-C(15)-H(15C)   | 109.5    |
| H(15A)-C(15)-H(15C) | 109.5    |
| H(15B)-C(15)-H(15C) | 109.5    |
| O(4)-C(16)-H(16A)   | 109.5    |
| O(4)-C(16)-H(16B)   | 109.5    |
| H(16A)-C(16)-H(16B) | 109.5    |
| O(4)-C(16)-H(16C)   | 109.5    |
| H(16A)-C(16)-H(16C) | 109.5    |
| H(16B)-C(16)-H(16C) | 109.5    |
| O(4)-C(17)-C(18)    | 124.9(3) |
| O(4)-C(17)-C(22)    | 115.6(3) |
| C(18)-C(17)-C(22)   | 119.5(3) |
| C(19)-C(18)-C(17)   | 119.4(3) |
| C(19)-C(18)-H(18)   | 120.3    |
| C(17)-C(18)-H(18)   | 120.3    |
| C(18)-C(19)-C(20)   | 122.3(3) |
| C(18)-C(19)-H(19)   | 118.8    |
| C(20)-C(19)-H(19)   | 118.8    |
| C(19)-C(20)-C(21)   | 117.1(3) |
| C(19)-C(20)-C(23)   | 126.8(3) |
| C(21)-C(20)-C(23)   | 116.1(3) |
| C(22)-C(21)-C(20)   | 121.9(3) |
| C(22)-C(21)-H(21)   | 119.1    |
| C(20)-C(21)-H(21)   | 119.1    |
| C(21)-C(22)-C(17)   | 119.9(3) |
| C(21)-C(22)-H(22)   | 120.0    |
| C(17)-C(22)-H(22)   | 120.0    |
| O(5)-C(23)-C(20)    | 110.6(3) |
| O(5)-C(23)-C(24)    | 108.7(3) |
| C(20)-C(23)-C(24)   | 109.2(3) |
| O(5)-C(23)-C(23)#2  | 104.0(4) |
| C(20)-C(23)-C(23)#2 | 114.5(3) |
| C(24)-C(23)-C(23)#2 | 109.5(2) |
| C(29)-C(24)-C(25)   | 117.0(4) |
| C(29)-C(24)-C(23)   | 120.3(3) |
| C(25)-C(24)-C(23)   | 122.7(3) |
| C(26)-C(25)-C(24)   | 121.5(3) |
| C(26)-C(25)-H(25)   | 119.3    |
| C(24)-C(25)-H(25)   | 119.3    |
| C(27)-C(26)-C(25)   | 120.2(4) |
| C(27)-C(26)-H(26)   | 119.9    |
| C(25)-C(26)-H(26)   | 119.9    |
| O(6)-C(27)-C(26)    | 116.7(3) |
| O(6)-C(27)-C(28)    | 123.6(3) |
| C(26)-C(27)-C(28)   | 119.8(3) |
| C(27)-C(28)-C(29)   | 119.0(4) |
| C(27)-C(28)-H(28)   | 120.5    |

|                     |          |
|---------------------|----------|
| C(29)-C(28)-H(28)   | 120.5    |
| C(24)-C(29)-C(28)   | 122.5(4) |
| C(24)-C(29)-H(29)   | 118.8    |
| C(28)-C(29)-H(29)   | 118.8    |
| O(6)-C(30)-H(30A)   | 109.5    |
| O(6)-C(30)-H(30B)   | 109.5    |
| H(30A)-C(30)-H(30B) | 109.5    |
| O(6)-C(30)-H(30C)   | 109.5    |
| H(30A)-C(30)-H(30C) | 109.5    |
| H(30B)-C(30)-H(30C) | 109.5    |
| O(7)-C(31)-H(31A)   | 109.5    |
| O(7)-C(31)-H(31B)   | 109.5    |
| H(31A)-C(31)-H(31B) | 109.5    |
| O(7)-C(31)-H(31C)   | 109.5    |
| H(31A)-C(31)-H(31C) | 109.5    |
| H(31B)-C(31)-H(31C) | 109.5    |
| O(7)-C(32)-C(37)    | 124.7(4) |
| O(7)-C(32)-C(33)    | 116.3(4) |
| C(37)-C(32)-C(33)   | 118.9(4) |
| C(34)-C(33)-C(32)   | 120.9(4) |
| C(34)-C(33)-H(33)   | 119.5    |
| C(32)-C(33)-H(33)   | 119.5    |
| C(33)-C(34)-C(35)   | 121.6(4) |
| C(33)-C(34)-H(34)   | 119.2    |
| C(35)-C(34)-H(34)   | 119.2    |
| C(34)-C(35)-C(36)   | 116.5(4) |
| C(34)-C(35)-C(38)   | 124.3(4) |
| C(36)-C(35)-C(38)   | 119.0(4) |
| C(37)-C(36)-C(35)   | 123.2(4) |
| C(37)-C(36)-H(36)   | 118.4    |
| C(35)-C(36)-H(36)   | 118.4    |
| C(32)-C(37)-C(36)   | 118.8(4) |
| C(32)-C(37)-H(37)   | 120.6    |
| C(36)-C(37)-H(37)   | 120.6    |
| O(8)-C(38)-C(39)    | 111.3(4) |
| O(8)-C(38)-C(38)#3  | 105.2(4) |
| C(39)-C(38)-C(38)#3 | 111.6(3) |
| O(8)-C(38)-C(35)    | 112.4(4) |
| C(39)-C(38)-C(35)   | 108.5(4) |
| C(38)#3-C(38)-C(35) | 108.0(3) |
| C(44)-C(39)-C(40)   | 118.0(4) |
| C(44)-C(39)-C(38)   | 127.7(5) |
| C(40)-C(39)-C(38)   | 114.1(4) |
| C(41)-C(40)-C(39)   | 121.4(4) |
| C(41)-C(40)-H(40)   | 119.3    |
| C(39)-C(40)-H(40)   | 119.3    |
| C(40)-C(41)-C(42)   | 120.3(4) |
| C(40)-C(41)-H(41)   | 119.9    |
| C(42)-C(41)-H(41)   | 119.9    |
| O(9)-C(42)-C(43)    | 125.1(4) |
| O(9)-C(42)-C(41)    | 115.1(4) |

|                     |          |
|---------------------|----------|
| C(43)-C(42)-C(41)   | 119.8(4) |
| C(42)-C(43)-C(44)   | 119.6(4) |
| C(42)-C(43)-H(43)   | 120.2    |
| C(44)-C(43)-H(43)   | 120.2    |
| C(43)-C(44)-C(39)   | 120.9(4) |
| C(43)-C(44)-H(44)   | 119.5    |
| C(39)-C(44)-H(44)   | 119.5    |
| O(9)-C(45)-H(45A)   | 109.5    |
| O(9)-C(45)-H(45B)   | 109.5    |
| H(45A)-C(45)-H(45B) | 109.5    |
| O(9)-C(45)-H(45C)   | 109.5    |
| H(45A)-C(45)-H(45C) | 109.5    |
| H(45B)-C(45)-H(45C) | 109.5    |
| O(10)-C(46)-H(46A)  | 109.5    |
| O(10)-C(46)-H(46B)  | 109.5    |
| H(46A)-C(46)-H(46B) | 109.5    |
| O(10)-C(46)-H(46C)  | 109.5    |
| H(46A)-C(46)-H(46C) | 109.5    |
| H(46B)-C(46)-H(46C) | 109.5    |
| O(10)-C(47)-C(48)   | 124.8(3) |
| O(10)-C(47)-C(52)   | 115.6(3) |
| C(48)-C(47)-C(52)   | 119.6(3) |
| C(47)-C(48)-C(49)   | 119.6(3) |
| C(47)-C(48)-H(48)   | 120.2    |
| C(49)-C(48)-H(48)   | 120.2    |
| C(50)-C(49)-C(48)   | 121.9(3) |
| C(50)-C(49)-H(49)   | 119.1    |
| C(48)-C(49)-H(49)   | 119.1    |
| C(49)-C(50)-C(51)   | 117.7(3) |
| C(49)-C(50)-C(53)   | 119.6(3) |
| C(51)-C(50)-C(53)   | 122.6(3) |
| C(52)-C(51)-C(50)   | 121.4(3) |
| C(52)-C(51)-H(51)   | 119.3    |
| C(50)-C(51)-H(51)   | 119.3    |
| C(51)-C(52)-C(47)   | 119.6(3) |
| C(51)-C(52)-H(52)   | 120.2    |
| C(47)-C(52)-H(52)   | 120.2    |
| O(11)-C(53)-C(54)   | 112.1(3) |
| O(11)-C(53)-C(50)   | 110.4(3) |
| C(54)-C(53)-C(50)   | 108.4(3) |
| O(11)-C(53)-C(53)#4 | 102.3(4) |
| C(54)-C(53)-C(53)#4 | 113.4(2) |
| C(50)-C(53)-C(53)#4 | 110.1(3) |
| C(55)-C(54)-C(59)   | 117.7(4) |
| C(55)-C(54)-C(53)   | 116.8(3) |
| C(59)-C(54)-C(53)   | 125.5(4) |
| C(56)-C(55)-C(54)   | 121.3(4) |
| C(56)-C(55)-H(55)   | 119.4    |
| C(54)-C(55)-H(55)   | 119.4    |
| C(55)-C(56)-C(57)   | 120.4(4) |
| C(55)-C(56)-H(56)   | 119.8    |

|                     |          |
|---------------------|----------|
| C(57)-C(56)-H(56)   | 119.8    |
| O(12)-C(57)-C(56)   | 115.5(3) |
| O(12)-C(57)-C(58)   | 124.5(3) |
| C(56)-C(57)-C(58)   | 120.1(3) |
| C(59)-C(58)-C(57)   | 118.4(3) |
| C(59)-C(58)-H(58)   | 120.8    |
| C(57)-C(58)-H(58)   | 120.8    |
| C(58)-C(59)-C(54)   | 122.1(4) |
| C(58)-C(59)-H(59)   | 119.0    |
| C(54)-C(59)-H(59)   | 119.0    |
| O(12)-C(60)-H(60A)  | 109.5    |
| O(12)-C(60)-H(60B)  | 109.5    |
| H(60A)-C(60)-H(60B) | 109.5    |
| O(12)-C(60)-H(60C)  | 109.5    |
| H(60A)-C(60)-H(60C) | 109.5    |
| H(60B)-C(60)-H(60C) | 109.5    |

---

Symmetry transformations used to generate equivalent atoms:

#1 -x+2,-y+1,z      #2 -x+1,-y+1,z      #3 -x+1,-y+2,z      #4 -x+2,-y+2,z

**Table SI-13. Anisotropic displacement parameters ( $\text{\AA}^2 \times 10^3$ )**

The anisotropic displacement factor exponent takes the form:

$$-2 \pi^2 [ h^2 a^{*2} U_{11} + \dots + 2 h k a^* b^* U_{12} ]$$

|       | U11   | U22   | U33   | U23    | U13    | U12    |
|-------|-------|-------|-------|--------|--------|--------|
| O(1)  | 25(1) | 33(2) | 22(1) | -4(1)  | 1(1)   | 2(1)   |
| O(2)  | 34(2) | 26(1) | 33(2) | -3(1)  | 0(1)   | -14(1) |
| O(3)  | 40(2) | 60(2) | 25(2) | 15(2)  | 2(1)   | 9(2)   |
| O(4)  | 31(1) | 22(1) | 23(1) | -2(1)  | -5(1)  | 1(1)   |
| O(5)  | 23(1) | 22(1) | 27(1) | 5(1)   | 4(1)   | 6(1)   |
| O(6)  | 28(1) | 47(2) | 20(1) | 4(1)   | 3(1)   | 5(1)   |
| O(7)  | 79(3) | 36(2) | 46(2) | 24(2)  | 31(2)  | 23(2)  |
| O(8)  | 38(2) | 38(2) | 32(2) | 16(1)  | -15(1) | -23(1) |
| O(9)  | 21(1) | 48(2) | 35(2) | 4(1)   | 1(1)   | -4(1)  |
| O(10) | 22(1) | 39(2) | 23(1) | 8(1)   | 5(1)   | 1(1)   |
| O(11) | 24(1) | 18(1) | 25(1) | 4(1)   | 2(1)   | 8(1)   |
| O(12) | 38(2) | 22(1) | 21(1) | -4(1)  | -6(1)  | 3(1)   |
| C(1)  | 37(2) | 22(2) | 22(2) | -3(2)  | 0(2)   | 5(2)   |
| C(2)  | 23(2) | 19(2) | 18(2) | 2(1)   | 0(1)   | 3(1)   |
| C(3)  | 22(2) | 18(2) | 26(2) | -3(1)  | -3(2)  | -2(1)  |
| C(4)  | 24(2) | 20(2) | 33(2) | 3(2)   | -1(2)  | 5(2)   |
| C(5)  | 33(2) | 29(2) | 21(2) | 1(2)   | -4(2)  | 16(2)  |
| C(6)  | 30(2) | 33(2) | 26(2) | -8(2)  | -10(2) | 13(2)  |
| C(7)  | 25(2) | 26(2) | 28(2) | -3(2)  | -6(2)  | 4(2)   |
| C(8)  | 32(2) | 29(2) | 38(2) | -1(2)  | -3(2)  | 2(2)   |
| C(9)  | 29(2) | 39(2) | 24(2) | -7(2)  | -2(2)  | 21(2)  |
| C(10) | 22(2) | 40(2) | 28(2) | -15(2) | -8(2)  | 13(2)  |
| C(11) | 19(2) | 31(2) | 37(2) | -5(2)  | 1(2)   | 2(2)   |
| C(12) | 21(2) | 37(2) | 21(2) | 2(2)   | 3(1)   | 6(2)   |
| C(13) | 25(2) | 33(2) | 23(2) | -9(2)  | -3(2)  | 6(2)   |
| C(14) | 31(2) | 27(2) | 32(2) | -5(2)  | 2(2)   | 9(2)   |
| C(15) | 43(3) | 93(4) | 23(2) | 10(3)  | -4(2)  | -1(3)  |
| C(16) | 23(2) | 24(2) | 22(2) | 0(1)   | -4(1)  | 1(2)   |
| C(17) | 19(2) | 18(2) | 19(2) | 1(1)   | 2(1)   | 1(1)   |
| C(18) | 20(2) | 20(2) | 21(2) | 3(1)   | 1(1)   | 0(1)   |
| C(19) | 26(2) | 19(2) | 21(2) | 4(1)   | -1(2)  | -5(1)  |
| C(20) | 21(2) | 29(2) | 17(2) | 4(1)   | 1(1)   | -7(2)  |
| C(21) | 28(2) | 27(2) | 22(2) | 8(2)   | -1(2)  | 2(2)   |
| C(22) | 29(2) | 17(2) | 25(2) | 2(1)   | 1(2)   | 3(2)   |
| C(23) | 21(2) | 23(2) | 23(2) | 1(2)   | -1(1)  | 2(1)   |
| C(24) | 28(2) | 18(2) | 22(2) | 2(1)   | -4(2)  | -4(2)  |
| C(25) | 28(2) | 24(2) | 22(2) | 2(2)   | -6(2)  | 0(2)   |
| C(26) | 25(2) | 25(2) | 25(2) | 2(2)   | -2(2)  | 3(2)   |
| C(27) | 30(2) | 18(2) | 19(2) | 1(1)   | 2(2)   | 6(2)   |
| C(28) | 28(2) | 21(2) | 20(2) | 1(1)   | -2(2)  | 4(2)   |
| C(29) | 27(2) | 18(2) | 21(2) | 2(1)   | -2(2)  | 0(1)   |
| C(30) | 36(2) | 55(3) | 17(2) | 10(2)  | 3(2)   | 9(2)   |
| C(31) | 58(3) | 85(4) | 51(3) | 47(3)  | 24(3)  | 46(3)  |
| C(32) | 33(2) | 25(2) | 41(2) | 10(2)  | 19(2)  | 9(2)   |

|       |       |       |       |        |        |        |
|-------|-------|-------|-------|--------|--------|--------|
| C(33) | 35(2) | 24(2) | 70(3) | -17(2) | 23(2)  | -7(2)  |
| C(34) | 26(2) | 31(2) | 60(3) | -23(2) | -8(2)  | 7(2)   |
| C(35) | 36(2) | 33(2) | 43(2) | -18(2) | -17(2) | 20(2)  |
| C(36) | 33(2) | 20(2) | 27(2) | -4(2)  | -8(2)  | 8(2)   |
| C(37) | 24(2) | 23(2) | 26(2) | 2(2)   | 1(2)   | 3(2)   |
| C(38) | 39(3) | 33(2) | 41(2) | -3(2)  | -3(2)  | 0(2)   |
| C(39) | 61(3) | 32(2) | 37(2) | -15(2) | -20(2) | 23(2)  |
| C(40) | 50(3) | 29(2) | 61(3) | -19(2) | -37(3) | 17(2)  |
| C(41) | 34(2) | 24(2) | 60(3) | -7(2)  | -24(2) | 2(2)   |
| C(42) | 30(2) | 21(2) | 31(2) | 5(2)   | -7(2)  | 1(2)   |
| C(43) | 30(2) | 16(2) | 22(2) | 0(1)   | -5(2)  | -2(1)  |
| C(44) | 43(2) | 18(2) | 23(2) | -1(1)  | -4(2)  | 9(2)   |
| C(45) | 32(2) | 39(2) | 25(2) | 2(2)   | 4(2)   | 1(2)   |
| C(46) | 33(2) | 39(2) | 26(2) | 12(2)  | 6(2)   | 2(2)   |
| C(47) | 22(2) | 16(2) | 19(2) | -3(1)  | 3(1)   | 0(1)   |
| C(48) | 25(2) | 19(2) | 14(2) | 0(1)   | -1(1)  | 2(1)   |
| C(49) | 24(2) | 18(2) | 18(2) | -2(1)  | 0(1)   | -4(1)  |
| C(50) | 30(2) | 20(2) | 21(2) | 3(1)   | -3(2)  | -7(2)  |
| C(51) | 28(2) | 20(2) | 24(2) | 5(2)   | -6(2)  | 1(2)   |
| C(52) | 22(2) | 19(2) | 27(2) | 1(2)   | -2(2)  | 2(1)   |
| C(53) | 24(2) | 23(2) | 24(2) | 1(2)   | 1(2)   | 0(2)   |
| C(54) | 25(2) | 31(2) | 21(2) | 5(2)   | 1(2)   | -10(2) |
| C(55) | 24(2) | 30(2) | 23(2) | 9(2)   | -2(2)  | -3(2)  |
| C(56) | 25(2) | 25(2) | 26(2) | 1(2)   | 2(2)   | 1(2)   |
| C(57) | 21(2) | 24(2) | 16(2) | -3(1)  | 1(1)   | -1(1)  |
| C(58) | 24(2) | 22(2) | 19(2) | 0(1)   | 1(1)   | 2(2)   |
| C(59) | 27(2) | 25(2) | 22(2) | -2(1)  | 2(2)   | -6(2)  |
| C(60) | 27(2) | 26(2) | 20(2) | -2(2)  | -7(2)  | 0(2)   |

---

**Table SI-14. Hydrogen coordinates (  $\times 10^4$ ) and isotropic displacement parameters ( $\text{\AA}^2 \times 10^3$ )**

|        | x         | y         | z        | U(eq) |
|--------|-----------|-----------|----------|-------|
| H(2A)  | 9530(50)  | 3920(60)  | 8270(60) | 46    |
| H(2B)  | 9290(70)  | 4020(70)  | 7960(40) | 46    |
| H(5)   | 4240(30)  | 6310(30)  | 4820(30) | 36    |
| H(8)   | 5760(40)  | 10910(40) | 7370(30) | 54    |
| H(11)  | 10690(30) | 8680(30)  | 640(30)  | 34    |
| H(1A)  | 8814      | 6619      | 11592    | 41    |
| H(1B)  | 7989      | 7134      | 11745    | 41    |
| H(1C)  | 8631      | 7421      | 11126    | 41    |
| H(3)   | 9565      | 6494      | 10559    | 26    |
| H(4)   | 10226     | 5926      | 9540     | 31    |
| H(6)   | 7996      | 5230      | 8734     | 36    |
| H(7)   | 7339      | 5784      | 9743     | 31    |
| H(10)  | 9578      | 6694      | 7992     | 36    |
| H(11A) | 9176      | 7381      | 6936     | 35    |
| H(13)  | 8424      | 5252      | 6044     | 32    |
| H(14)  | 8863      | 4576      | 7092     | 36    |
| H(15A) | 8375      | 6078      | 4966     | 79    |
| H(15B) | 7796      | 6866      | 4922     | 79    |
| H(15C) | 7585      | 6158      | 5494     | 79    |
| H(16A) | 6765      | 6215      | 8114     | 35    |
| H(16B) | 7505      | 6860      | 8180     | 35    |
| H(16C) | 7600      | 6091      | 7650     | 35    |
| H(18)  | 6620      | 5363      | 7066     | 25    |
| H(19)  | 5893      | 4764      | 6102     | 27    |
| H(21)  | 5430      | 6966      | 5232     | 31    |
| H(22)  | 6134      | 7578      | 6190     | 29    |
| H(25)  | 6689      | 5527      | 4476     | 29    |
| H(26)  | 7288      | 5903      | 3364     | 30    |
| H(28)  | 5009      | 6390      | 2538     | 28    |
| H(29)  | 4419      | 6001      | 3655     | 26    |
| H(30A) | 5679      | 6276      | 1499     | 54    |
| H(30B) | 6455      | 6776      | 1186     | 54    |
| H(30C) | 5839      | 7187      | 1767     | 54    |
| H(31A) | 7351      | 8364      | 9744     | 97    |
| H(31B) | 7075      | 7642      | 10280    | 97    |
| H(31C) | 6577      | 8482      | 10286    | 97    |
| H(33)  | 5612      | 7418      | 8251     | 52    |
| H(34)  | 5245      | 8218      | 7261     | 47    |
| H(36)  | 6065      | 10191     | 8335     | 32    |
| H(37)  | 6500      | 9393      | 9318     | 29    |
| H(40)  | 6934      | 9651      | 6474     | 56    |
| H(41)  | 7432      | 9100      | 5412     | 47    |
| H(43)  | 5091      | 8497      | 4795     | 28    |
| H(44)  | 4592      | 9010      | 5902     | 34    |
| H(45A) | 5881      | 7621      | 4042     | 48    |
| H(45B) | 6468      | 7954      | 3399     | 48    |
| H(45C) | 5709      | 8494      | 3687     | 48    |

|        |       |       |       |    |
|--------|-------|-------|-------|----|
| H(46A) | 8747  | 7473  | 3339  | 49 |
| H(46B) | 7971  | 7635  | 3870  | 49 |
| H(46C) | 8726  | 8266  | 3845  | 49 |
| H(48)  | 9622  | 8529  | 2915  | 23 |
| H(49)  | 10363 | 9087  | 1937  | 24 |
| H(51)  | 8231  | 9462  | 828   | 29 |
| H(52)  | 7472  | 8955  | 1817  | 27 |
| H(55)  | 9730  | 8051  | 99    | 31 |
| H(56)  | 9083  | 7507  | -921  | 30 |
| H(58)  | 8375  | 9758  | -1571 | 26 |
| H(59)  | 9005  | 10292 | -520  | 29 |
| H(60A) | 7460  | 8940  | -2248 | 36 |
| H(60B) | 7729  | 8322  | -2883 | 36 |
| H(60C) | 8307  | 9083  | -2691 | 36 |

---

**Table SI-15. Torsion angles [deg]**

|                         |           |
|-------------------------|-----------|
| C(1)-O(1)-C(2)-C(3)     | 8.2(5)    |
| C(1)-O(1)-C(2)-C(7)     | -172.8(3) |
| O(1)-C(2)-C(3)-C(4)     | 178.2(3)  |
| C(7)-C(2)-C(3)-C(4)     | -0.8(6)   |
| C(2)-C(3)-C(4)-C(5)     | 0.1(6)    |
| C(3)-C(4)-C(5)-C(6)     | 0.7(6)    |
| C(3)-C(4)-C(5)-C(8)     | -175.8(4) |
| C(4)-C(5)-C(6)-C(7)     | -0.9(6)   |
| C(8)-C(5)-C(6)-C(7)     | 176.1(4)  |
| C(5)-C(6)-C(7)-C(2)     | 0.3(6)    |
| O(1)-C(2)-C(7)-C(6)     | -178.5(3) |
| C(3)-C(2)-C(7)-C(6)     | 0.6(6)    |
| C(4)-C(5)-C(8)-O(2)     | 125.9(4)  |
| C(6)-C(5)-C(8)-O(2)     | -50.7(5)  |
| C(4)-C(5)-C(8)-C(9)     | -112.5(4) |
| C(6)-C(5)-C(8)-C(9)     | 70.9(5)   |
| C(4)-C(5)-C(8)-C(8)#1   | 8.3(7)    |
| C(6)-C(5)-C(8)-C(8)#1   | -168.3(4) |
| O(2)-C(8)-C(9)-C(14)    | -14.0(5)  |
| C(5)-C(8)-C(9)-C(14)    | -133.0(4) |
| C(8)#1-C(8)-C(9)-C(14)  | 102.9(5)  |
| O(2)-C(8)-C(9)-C(10)    | 163.6(4)  |
| C(5)-C(8)-C(9)-C(10)    | 44.6(5)   |
| C(8)#1-C(8)-C(9)-C(10)  | -79.6(5)  |
| C(14)-C(9)-C(10)-C(11)  | -0.9(6)   |
| C(8)-C(9)-C(10)-C(11)   | -178.5(4) |
| C(9)-C(10)-C(11)-C(12)  | 0.8(6)    |
| C(15)-O(3)-C(12)-C(13)  | 11.4(6)   |
| C(15)-O(3)-C(12)-C(11)  | -167.6(4) |
| C(10)-C(11)-C(12)-O(3)  | 179.2(3)  |
| C(10)-C(11)-C(12)-C(13) | 0.2(6)    |
| O(3)-C(12)-C(13)-C(14)  | -180.0(4) |
| C(11)-C(12)-C(13)-C(14) | -1.0(6)   |
| C(10)-C(9)-C(14)-C(13)  | 0.0(6)    |
| C(8)-C(9)-C(14)-C(13)   | 177.7(4)  |
| C(12)-C(13)-C(14)-C(9)  | 1.0(6)    |
| C(16)-O(4)-C(17)-C(18)  | -3.1(5)   |
| C(16)-O(4)-C(17)-C(22)  | 177.5(3)  |
| O(4)-C(17)-C(18)-C(19)  | -179.6(3) |
| C(22)-C(17)-C(18)-C(19) | -0.2(5)   |
| C(17)-C(18)-C(19)-C(20) | 0.1(6)    |
| C(18)-C(19)-C(20)-C(21) | 0.4(6)    |
| C(18)-C(19)-C(20)-C(23) | -178.3(3) |
| C(19)-C(20)-C(21)-C(22) | -0.8(6)   |
| C(23)-C(20)-C(21)-C(22) | 178.0(3)  |
| C(20)-C(21)-C(22)-C(17) | 0.8(6)    |
| O(4)-C(17)-C(22)-C(21)  | 179.3(3)  |
| C(18)-C(17)-C(22)-C(21) | -0.3(5)   |
| C(19)-C(20)-C(23)-O(5)  | 119.3(4)  |

|                           |           |
|---------------------------|-----------|
| C(21)-C(20)-C(23)-O(5)    | -59.5(4)  |
| C(19)-C(20)-C(23)-C(24)   | -121.0(4) |
| C(21)-C(20)-C(23)-C(24)   | 60.2(4)   |
| C(19)-C(20)-C(23)-C(23)#2 | 2.2(6)    |
| C(21)-C(20)-C(23)-C(23)#2 | -176.6(4) |
| O(5)-C(23)-C(24)-C(29)    | -19.2(5)  |
| C(20)-C(23)-C(24)-C(29)   | -140.0(4) |
| C(23)#2-C(23)-C(24)-C(29) | 93.9(4)   |
| O(5)-C(23)-C(24)-C(25)    | 162.9(3)  |
| C(20)-C(23)-C(24)-C(25)   | 42.0(5)   |
| C(23)#2-C(23)-C(24)-C(25) | -84.1(5)  |
| C(29)-C(24)-C(25)-C(26)   | 0.6(6)    |
| C(23)-C(24)-C(25)-C(26)   | 178.7(3)  |
| C(24)-C(25)-C(26)-C(27)   | -0.3(6)   |
| C(30)-O(6)-C(27)-C(26)    | -177.5(4) |
| C(30)-O(6)-C(27)-C(28)    | 2.8(6)    |
| C(25)-C(26)-C(27)-O(6)    | -179.6(3) |
| C(25)-C(26)-C(27)-C(28)   | 0.1(6)    |
| O(6)-C(27)-C(28)-C(29)    | 179.3(3)  |
| C(26)-C(27)-C(28)-C(29)   | -0.4(6)   |
| C(25)-C(24)-C(29)-C(28)   | -0.9(6)   |
| C(23)-C(24)-C(29)-C(28)   | -179.0(3) |
| C(27)-C(28)-C(29)-C(24)   | 0.8(6)    |
| C(31)-O(7)-C(32)-C(37)    | -14.1(6)  |
| C(31)-O(7)-C(32)-C(33)    | 167.8(4)  |
| O(7)-C(32)-C(33)-C(34)    | -178.7(4) |
| C(37)-C(32)-C(33)-C(34)   | 3.0(6)    |
| C(32)-C(33)-C(34)-C(35)   | -1.7(7)   |
| C(33)-C(34)-C(35)-C(36)   | -1.2(7)   |
| C(33)-C(34)-C(35)-C(38)   | 173.1(4)  |
| C(34)-C(35)-C(36)-C(37)   | 2.9(7)    |
| C(38)-C(35)-C(36)-C(37)   | -171.7(4) |
| O(7)-C(32)-C(37)-C(36)    | -179.5(4) |
| C(33)-C(32)-C(37)-C(36)   | -1.3(6)   |
| C(35)-C(36)-C(37)-C(32)   | -1.7(6)   |
| C(34)-C(35)-C(38)-O(8)    | -158.9(4) |
| C(36)-C(35)-C(38)-O(8)    | 15.3(6)   |
| C(34)-C(35)-C(38)-C(39)   | -35.5(6)  |
| C(36)-C(35)-C(38)-C(39)   | 138.7(4)  |
| C(34)-C(35)-C(38)-C(38)#3 | 85.6(5)   |
| C(36)-C(35)-C(38)-C(38)#3 | -100.2(5) |
| O(8)-C(38)-C(39)-C(44)    | -133.6(5) |
| C(38)#3-C(38)-C(39)-C(44) | -16.5(7)  |
| C(35)-C(38)-C(39)-C(44)   | 102.3(5)  |
| O(8)-C(38)-C(39)-C(40)    | 41.6(5)   |
| C(38)#3-C(38)-C(39)-C(40) | 158.7(5)  |
| C(35)-C(38)-C(39)-C(40)   | -82.5(5)  |
| C(44)-C(39)-C(40)-C(41)   | 1.5(7)    |
| C(38)-C(39)-C(40)-C(41)   | -174.2(4) |
| C(39)-C(40)-C(41)-C(42)   | 0.8(7)    |
| C(45)-O(9)-C(42)-C(43)    | -1.4(6)   |

|                           |           |
|---------------------------|-----------|
| C(45)-O(9)-C(42)-C(41)    | 179.0(4)  |
| C(40)-C(41)-C(42)-O(9)    | 177.9(4)  |
| C(40)-C(41)-C(42)-C(43)   | -1.7(6)   |
| O(9)-C(42)-C(43)-C(44)    | -179.3(3) |
| C(41)-C(42)-C(43)-C(44)   | 0.2(6)    |
| C(42)-C(43)-C(44)-C(39)   | 2.2(6)    |
| C(40)-C(39)-C(44)-C(43)   | -3.0(6)   |
| C(38)-C(39)-C(44)-C(43)   | 172.0(4)  |
| C(46)-O(10)-C(47)-C(48)   | -9.8(5)   |
| C(46)-O(10)-C(47)-C(52)   | 169.2(3)  |
| O(10)-C(47)-C(48)-C(49)   | 177.0(3)  |
| C(52)-C(47)-C(48)-C(49)   | -2.0(5)   |
| C(47)-C(48)-C(49)-C(50)   | -2.0(5)   |
| C(48)-C(49)-C(50)-C(51)   | 4.4(5)    |
| C(48)-C(49)-C(50)-C(53)   | -171.0(3) |
| C(49)-C(50)-C(51)-C(52)   | -3.1(6)   |
| C(53)-C(50)-C(51)-C(52)   | 172.2(3)  |
| C(50)-C(51)-C(52)-C(47)   | -0.7(6)   |
| O(10)-C(47)-C(52)-C(51)   | -175.8(3) |
| C(48)-C(47)-C(52)-C(51)   | 3.3(5)    |
| C(49)-C(50)-C(53)-O(11)   | 19.0(5)   |
| C(51)-C(50)-C(53)-O(11)   | -156.2(3) |
| C(49)-C(50)-C(53)-C(54)   | 142.2(4)  |
| C(51)-C(50)-C(53)-C(54)   | -33.0(5)  |
| C(49)-C(50)-C(53)-C(53)#4 | -93.2(4)  |
| C(51)-C(50)-C(53)-C(53)#4 | 91.6(4)   |
| O(11)-C(53)-C(54)-C(55)   | 49.6(4)   |
| C(50)-C(53)-C(54)-C(55)   | -72.5(4)  |
| C(53)#4-C(53)-C(54)-C(55) | 164.8(4)  |
| O(11)-C(53)-C(54)-C(59)   | -131.7(4) |
| C(50)-C(53)-C(54)-C(59)   | 106.1(4)  |
| C(53)#4-C(53)-C(54)-C(59) | -16.5(6)  |
| C(59)-C(54)-C(55)-C(56)   | 1.9(6)    |
| C(53)-C(54)-C(55)-C(56)   | -179.3(3) |
| C(54)-C(55)-C(56)-C(57)   | 0.9(6)    |
| C(60)-O(12)-C(57)-C(56)   | 177.3(3)  |
| C(60)-O(12)-C(57)-C(58)   | -2.7(5)   |
| C(55)-C(56)-C(57)-O(12)   | 177.0(3)  |
| C(55)-C(56)-C(57)-C(58)   | -3.0(6)   |
| O(12)-C(57)-C(58)-C(59)   | -177.9(3) |
| C(56)-C(57)-C(58)-C(59)   | 2.1(5)    |
| C(57)-C(58)-C(59)-C(54)   | 0.8(6)    |
| C(55)-C(54)-C(59)-C(58)   | -2.8(6)   |
| C(53)-C(54)-C(59)-C(58)   | 178.6(3)  |

---

Symmetry transformations used to generate equivalent atoms:

#1 -x+2,-y+1,z      #2 -x+1,-y+1,z      #3 -x+1,-y+2,z      #4 -x+2,-y+2,z

#### d. Determination of SF<sub>6</sub> Decomposition Side Products. Validation of FSO<sub>3</sub><sup>-</sup>

##### Synthesis of [DIPEA-H<sup>+</sup>][FSO<sub>3</sub><sup>-</sup>]

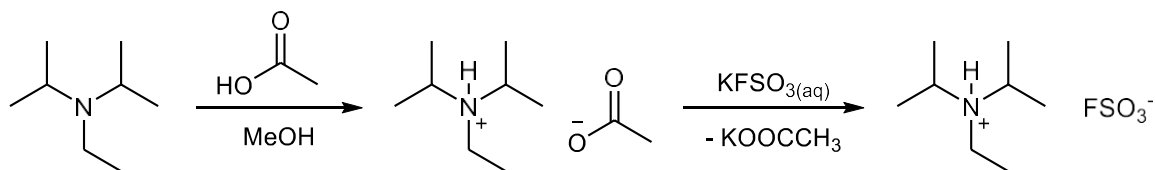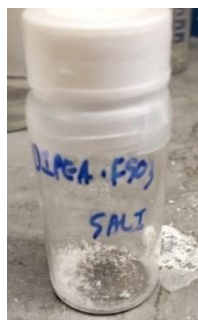

In a clean vial, DIPEA (2.0 mmol, 1 equiv.) was dissolved in methanol (1 mL). After adding acetic acid (2.0 mmol, 1 equiv.), the mixture was vigorously shaken and then concentrated *in vacuo*. The dried residue was then dissolved in 20 mL of DCM and transferred into a separatory funnel. After adding an aqueous solution of KSO<sub>3</sub>F prepared from commercially available salt (1.8 mmol in 20 mL of H<sub>2</sub>O), the separatory funnel was vigorously shaken. The resulting organic layer was then dried with NaSO<sub>4</sub> and concentrated *in vacuo* to give [DIPEA-H<sup>+</sup>][SO<sub>3</sub>F<sup>-</sup>] as white solid. <sup>19</sup>F NMR (471 MHz, CDCl<sub>3</sub>) δ 38.52; HRMS (ESI<sup>-</sup>) (m/z): [M]<sup>-</sup> calcd for [SFO<sub>3</sub><sup>-</sup>] 98.9552, found 98.9564.

##### [DIPEA-H<sup>+</sup>][FSO<sub>3</sub><sup>-</sup>] Addition Experiment

Substrate **1g** was fluorinated under the standard reaction condition and after removing the light source analyzed by HRMS to contain molecular ion [SO<sub>3</sub>F<sup>-</sup>] with m/z =98.9552 Da (ESI<sup>-</sup>). An aliquot (0.2 mL) of the crude reaction was taken out, followed by addition of [DIPEA-H<sup>+</sup>][FSO<sub>3</sub><sup>-</sup>] solution from above (2 mg in 0.5 mL CDCl<sub>3</sub>). The reaction was then stirred in dark for 5 minutes, and another aliquot (0.2 mL) of sample was taken out. Both samples were subjected to <sup>19</sup>F NMR and compared.

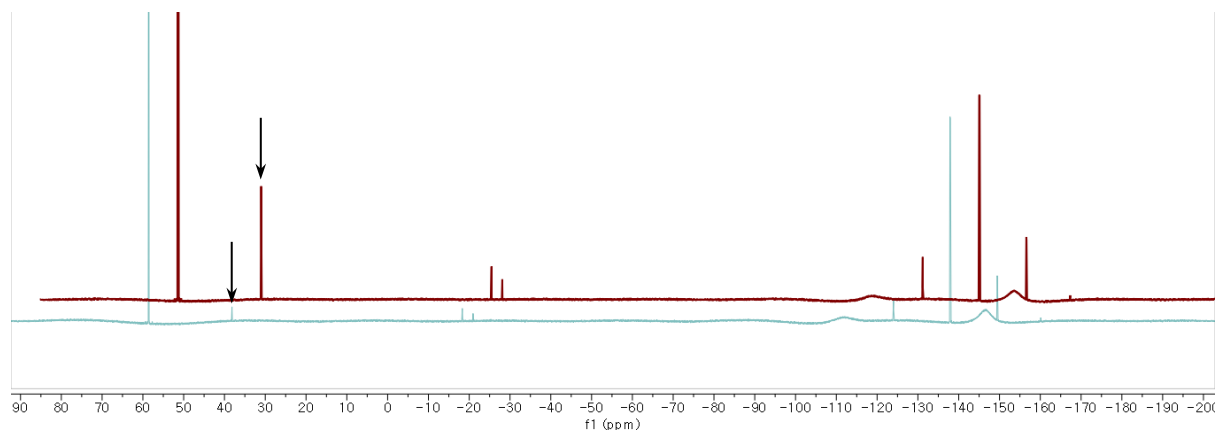

After the addition of [DIPEA-H<sup>+</sup>][FSO<sub>3</sub><sup>-</sup>], the intensity of the peak at 38.15 ppm was significantly enhanced, which verifies the formation of FSO<sub>3</sub><sup>-</sup> as side product.

### e. PPh<sub>3</sub> Quenching Experiment

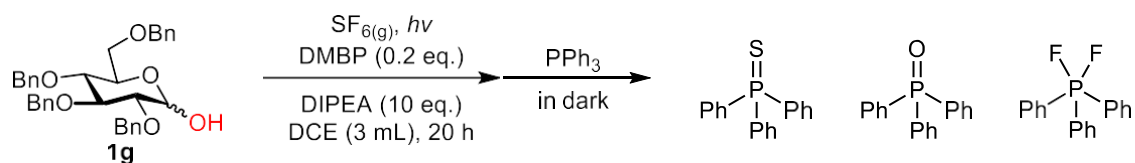

Substrate **1g** was subjected to a standard reaction. After removing the light source, an aliquot of crude reaction was taken out, and then  $\text{PPh}_3$  solution (0.1 mmol in 0.5 mL of  $\text{CDCl}_3$ ) was injected into the reaction vial. The mixture was stirred in dark, and samples were taken out after 3 hours and after 23 hours. All samples were subjected to  $^{19}\text{F}$  and  $^{31}\text{P}$  NMR experiments. Formation of  $\text{Ph}_3\text{P}=\text{S}$ , and  $\text{Ph}_3\text{PF}_2$  (as well as  $\text{Ph}_3\text{P}=\text{O}$ ) was confirmed by the direct comparison of the resultant and published spectral data.

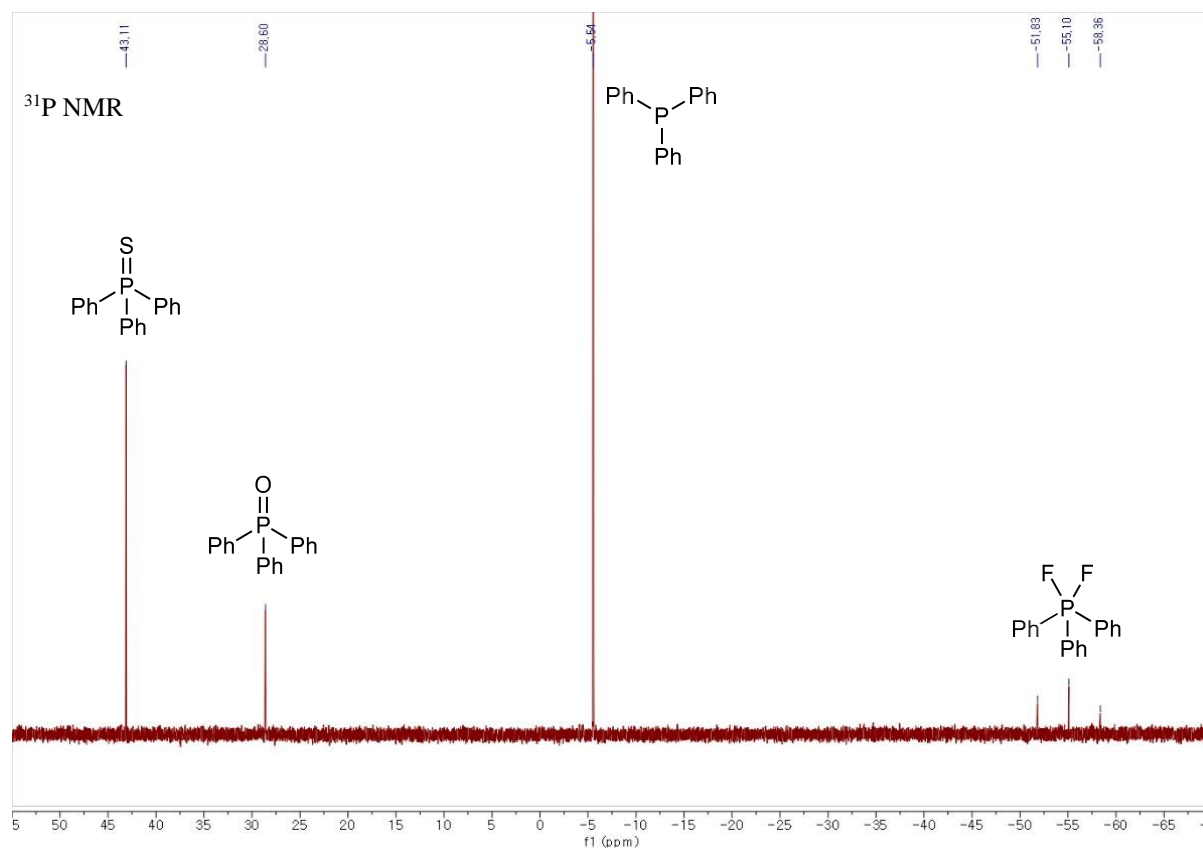

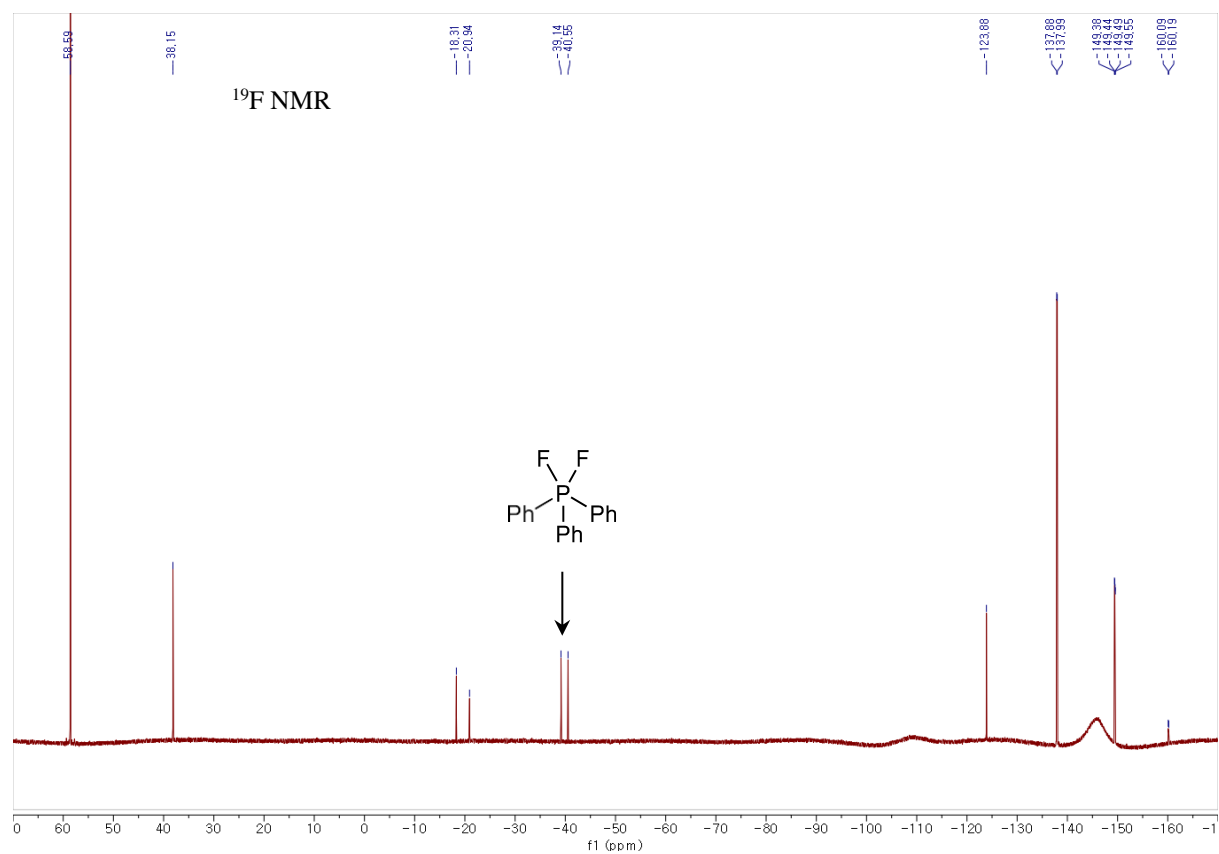

## f. Ketyl Radical Experiment

### Synthesis of Ketyl Radical Solution

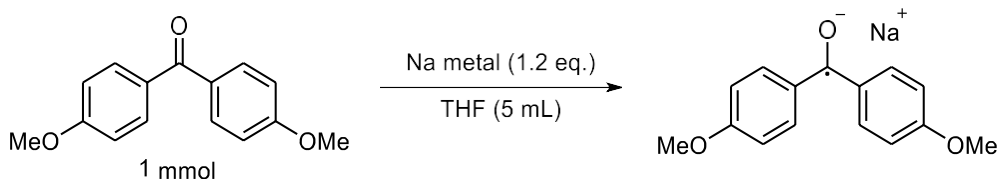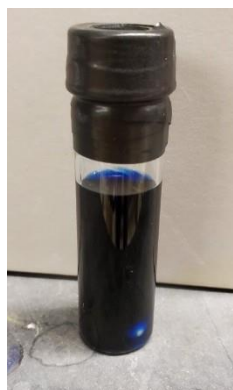

Into an oven dried 2 dram vial, 4,4'-dimethoxybenzophenone (1.0 mmol, 1 equiv.) and sodium metal (1.2 mmol, 1.2 equiv.) were added. The vial was sealed and connected to high vacuum. After drying the content in the vial for 10 minutes, the vial was disconnected from the vacuum line, and dry THF (5 mL) was injected to the vial. The mixture was stirred for 1 hour to give a deep blue solution.

### Fluorination of Glycoside with the Ketyl Radical Solution

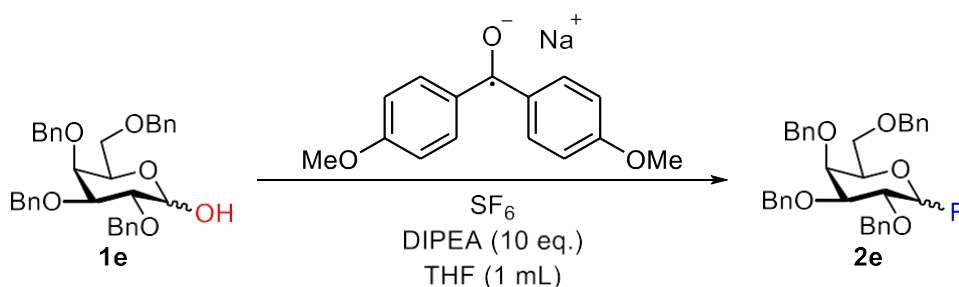

Into an oven dried 1 dram vial, 2,3,4,6-tetrakis-O-(phenylmethyl)-D-galactopyranose **1e** (0.1 mmol, 1.0 equiv.) was added and sealed. The vial was connected to the vacuum line and the content was dried for 10 min. After disconnecting the vial, DIPEA (1.0 mmol, 10 equiv.) and dry THF (1 mL) were added and stirred until the mixture became homogeneous. A balloon containing SF<sub>6</sub> was then plugged into the vial and the solution was sparged.

Into the 2 mL of the ketyl radical solution prepared before, a balloon containing SF<sub>6</sub> was plugged followed by the addition of 1 mL mixture containing **1e**. The reaction mixture was stirred in dark for 20 h and concentrated *in vacuo*. The crude mixture was then purified by FCC (SiO<sub>2</sub>, 30% EtOAc in hexaness) to yield **2e** in 1% yield (~0.5 mg).

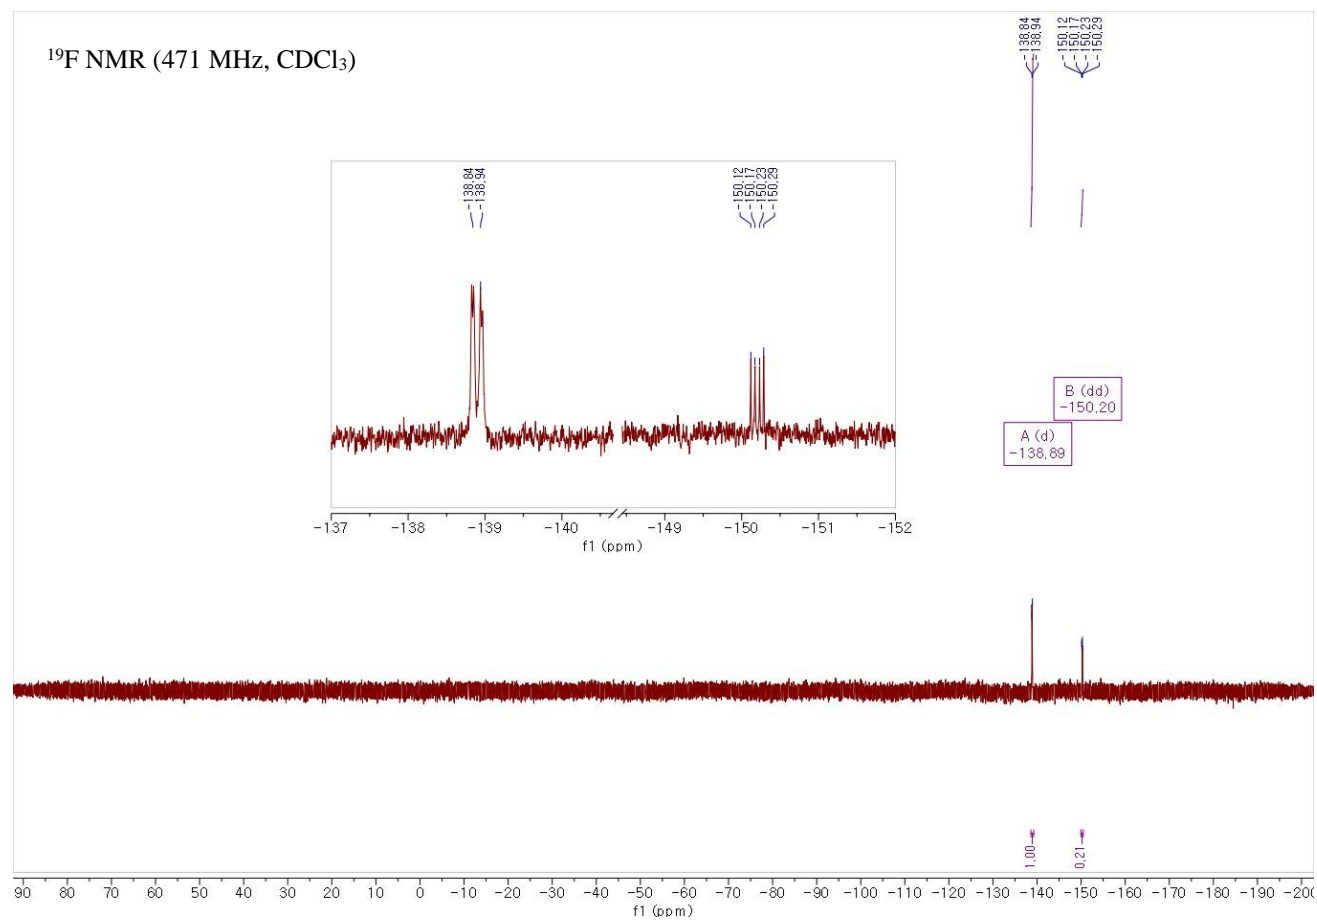

# N-Phenylphenothiazine (PC1)

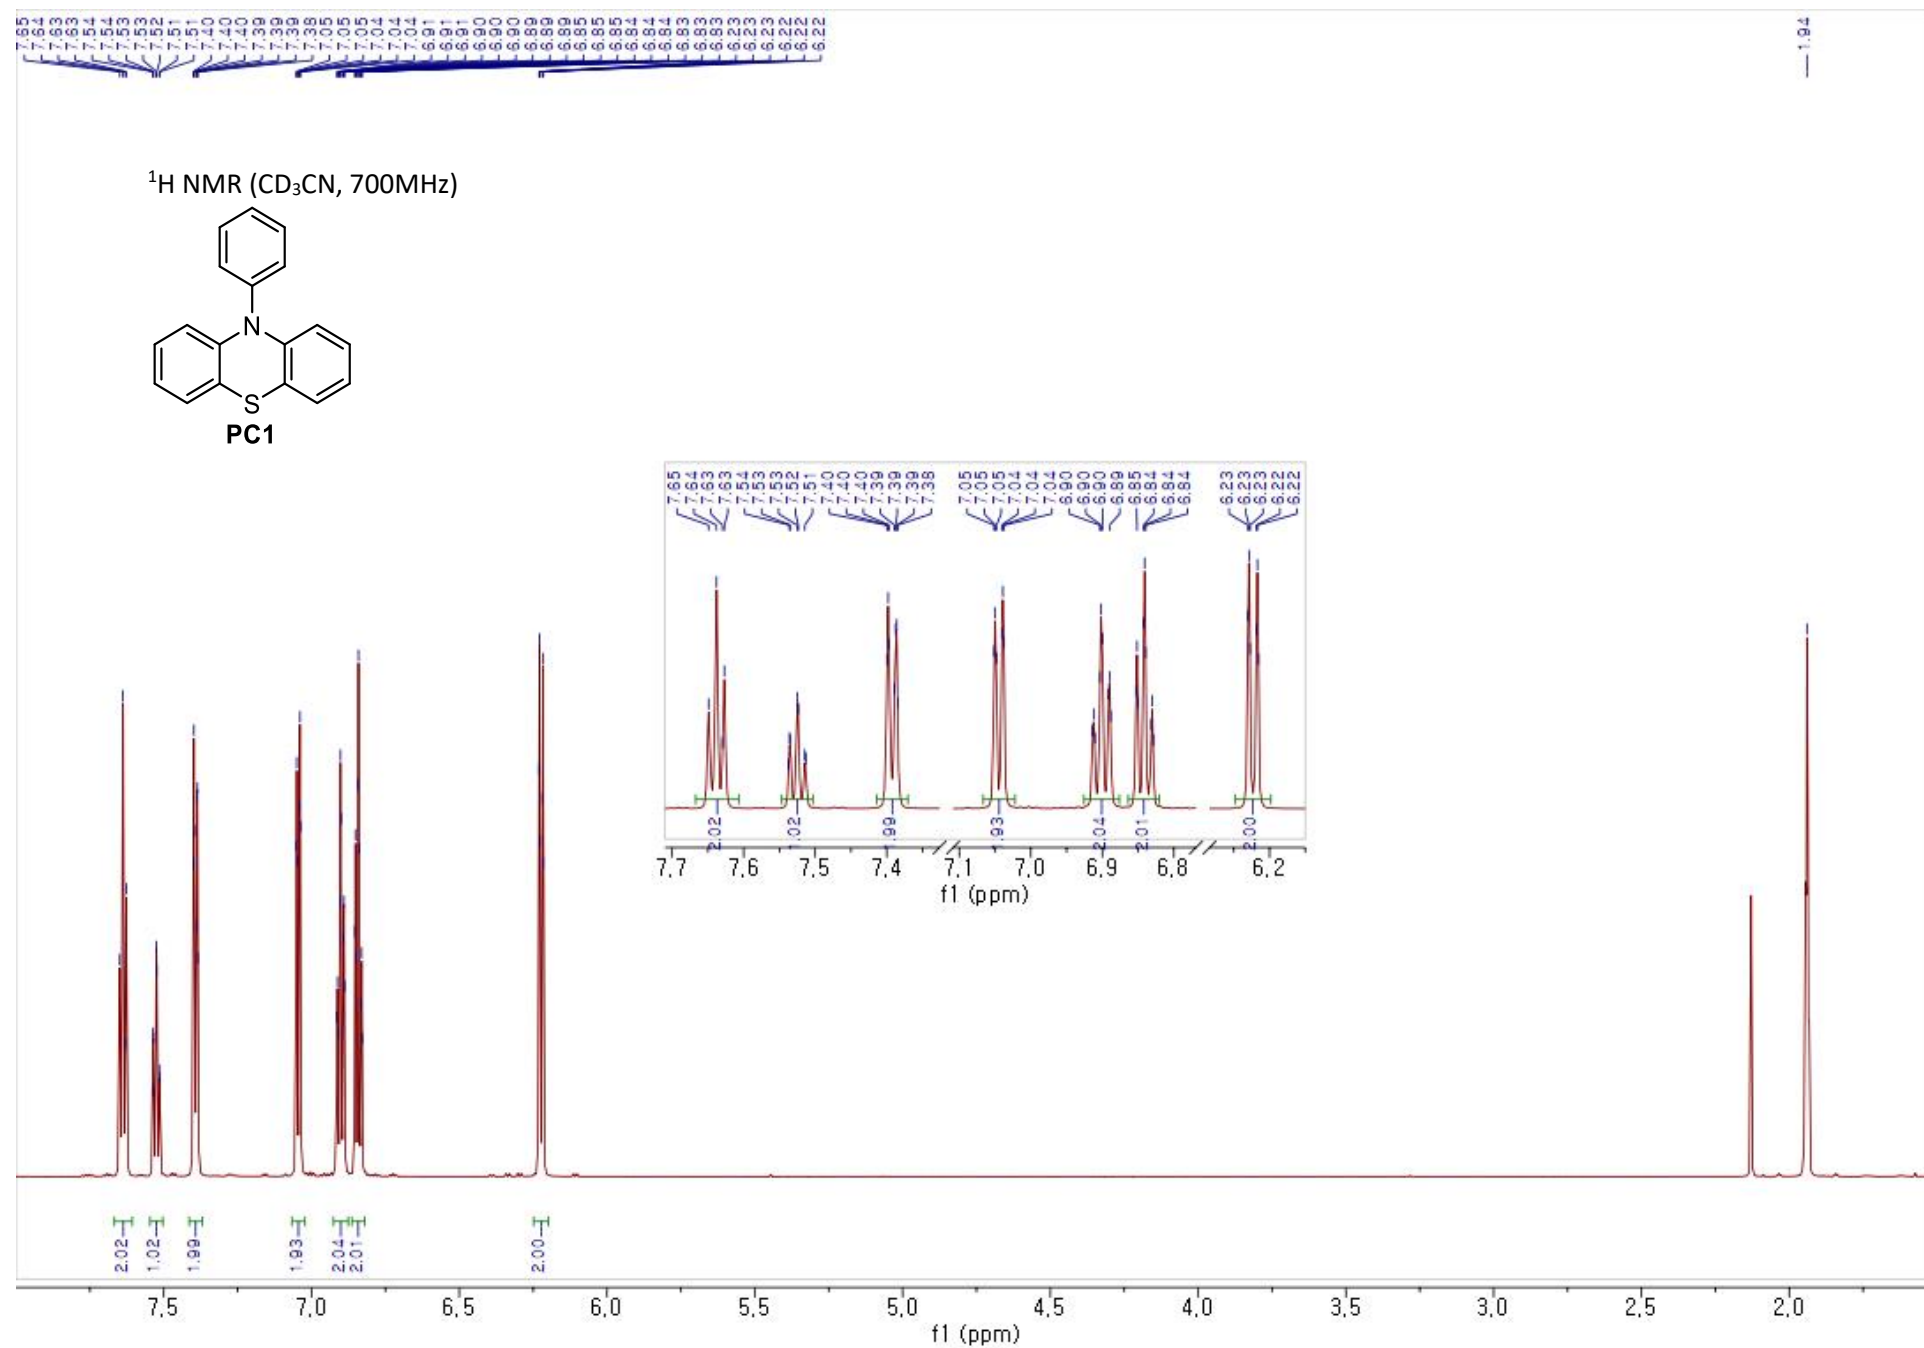

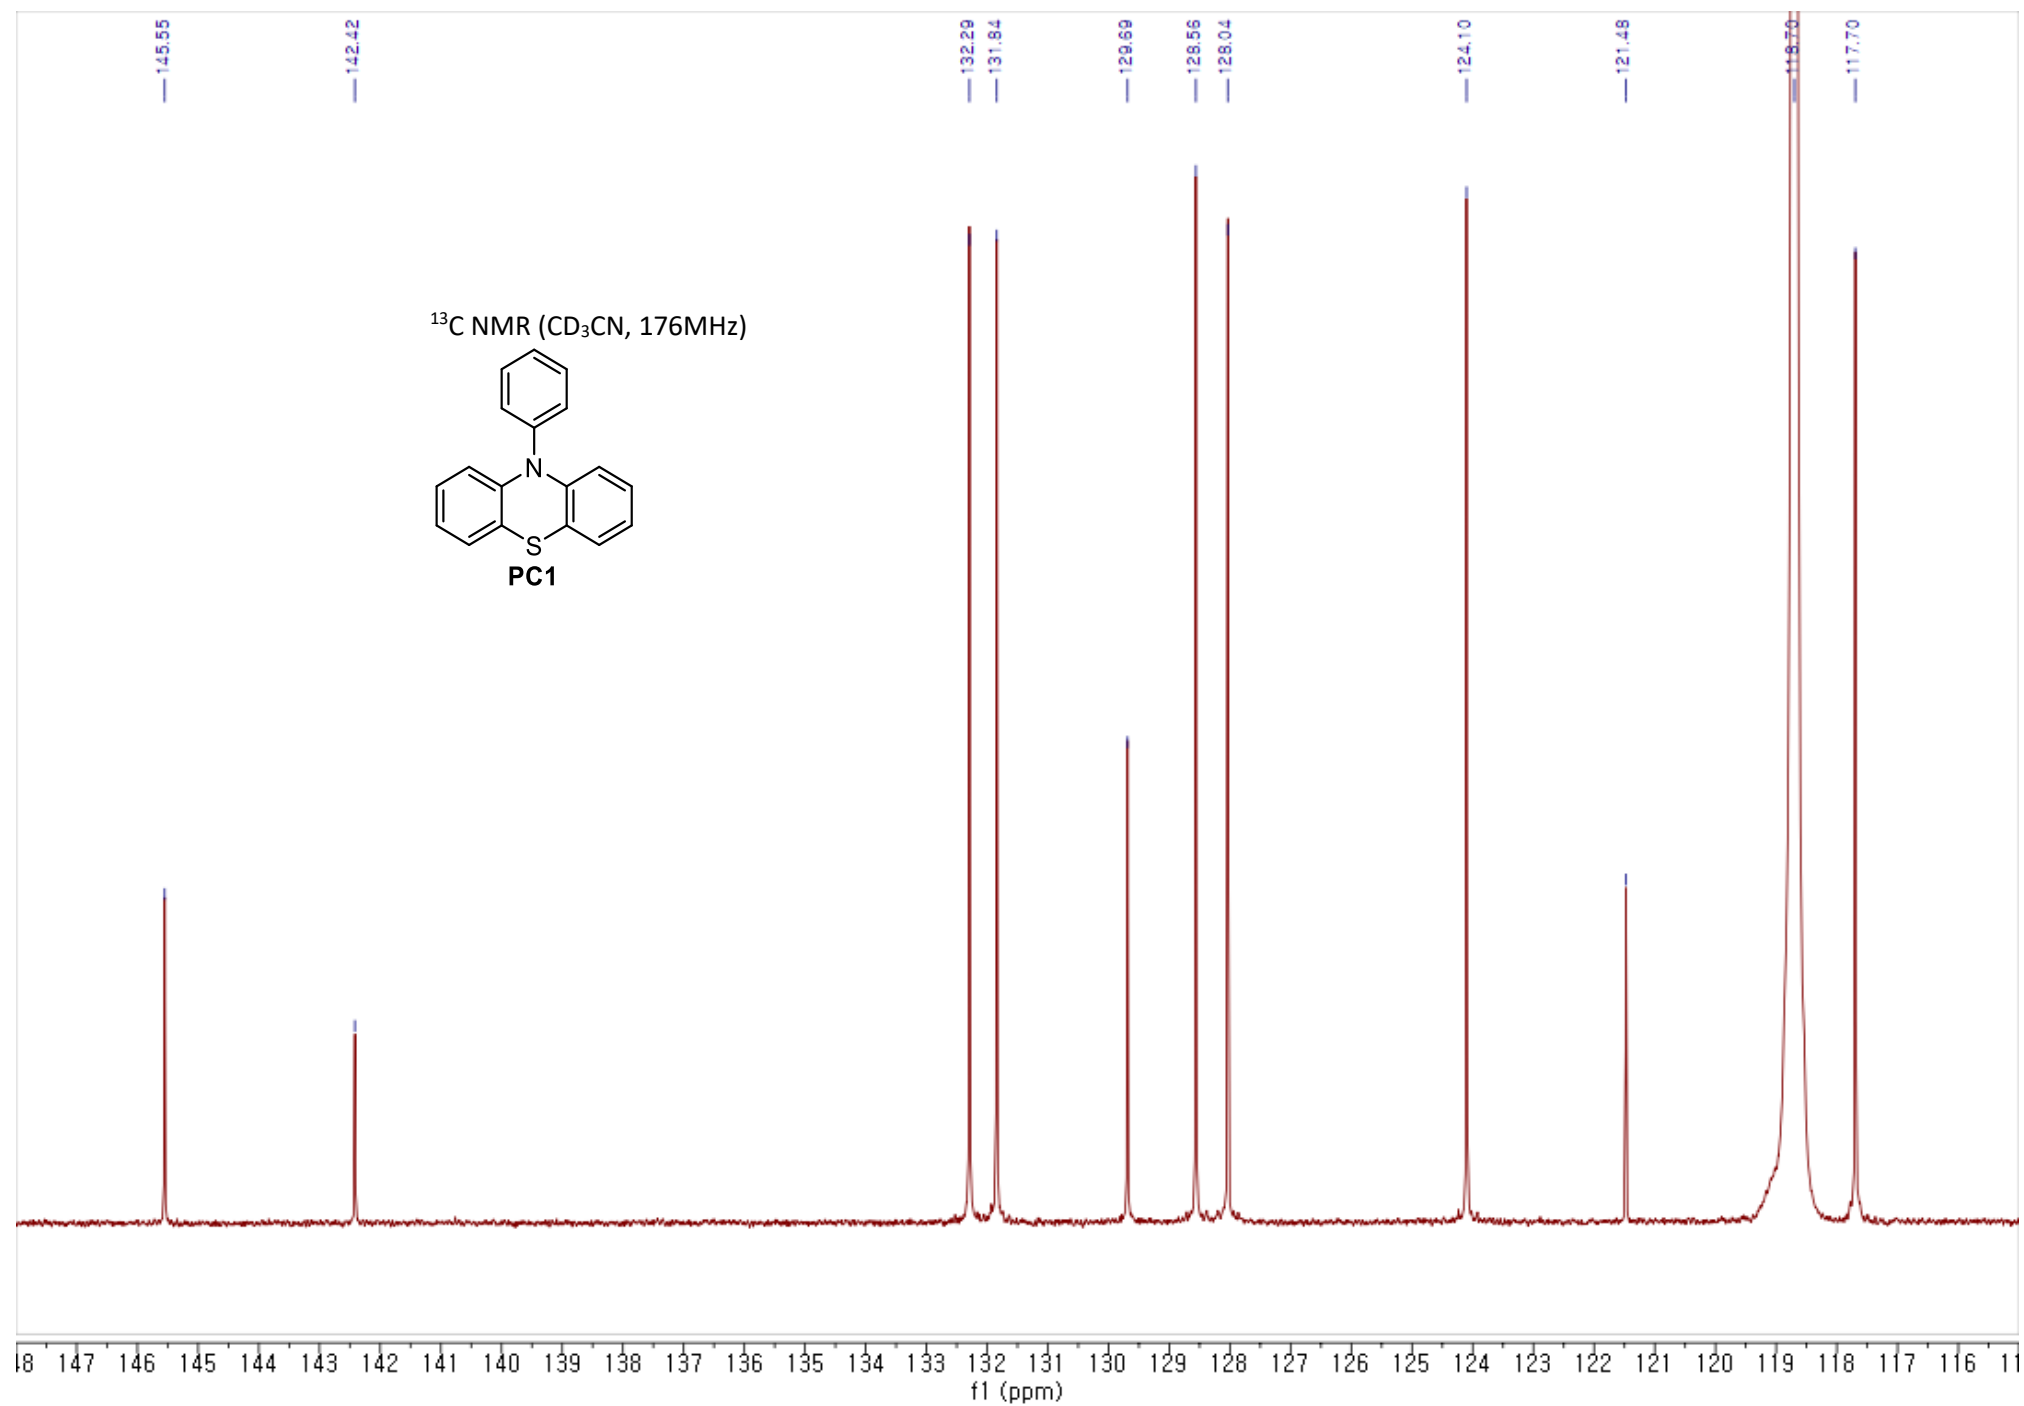

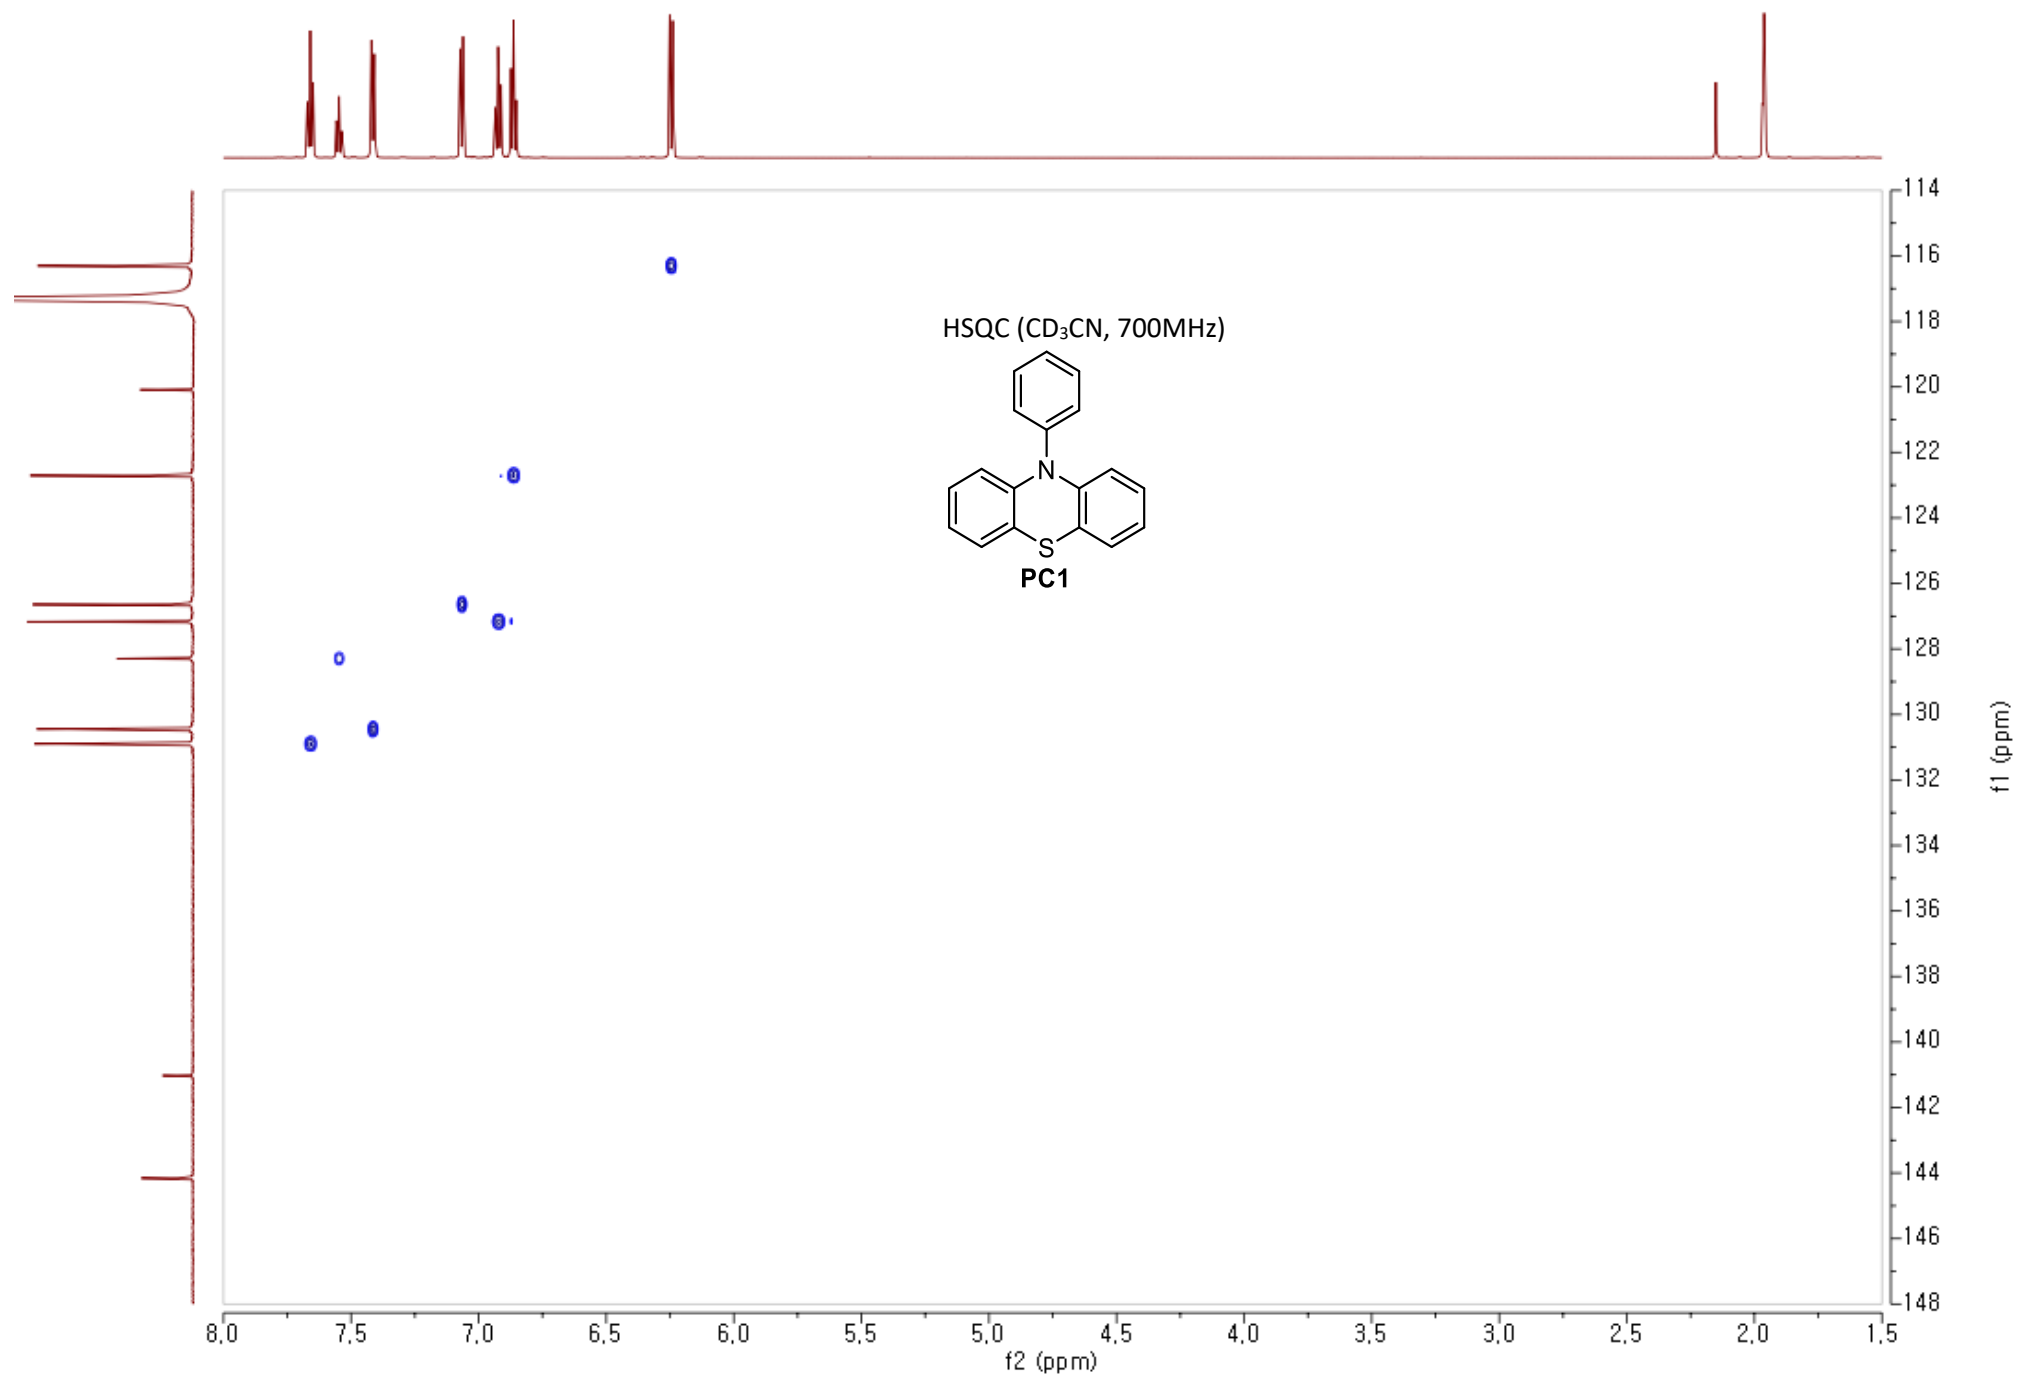

2,3,4,6-Tetra-*O*-acetyl- $\alpha$ -D-mannopyranosyl fluoride (2a- $\alpha$ , Major diastereomer)

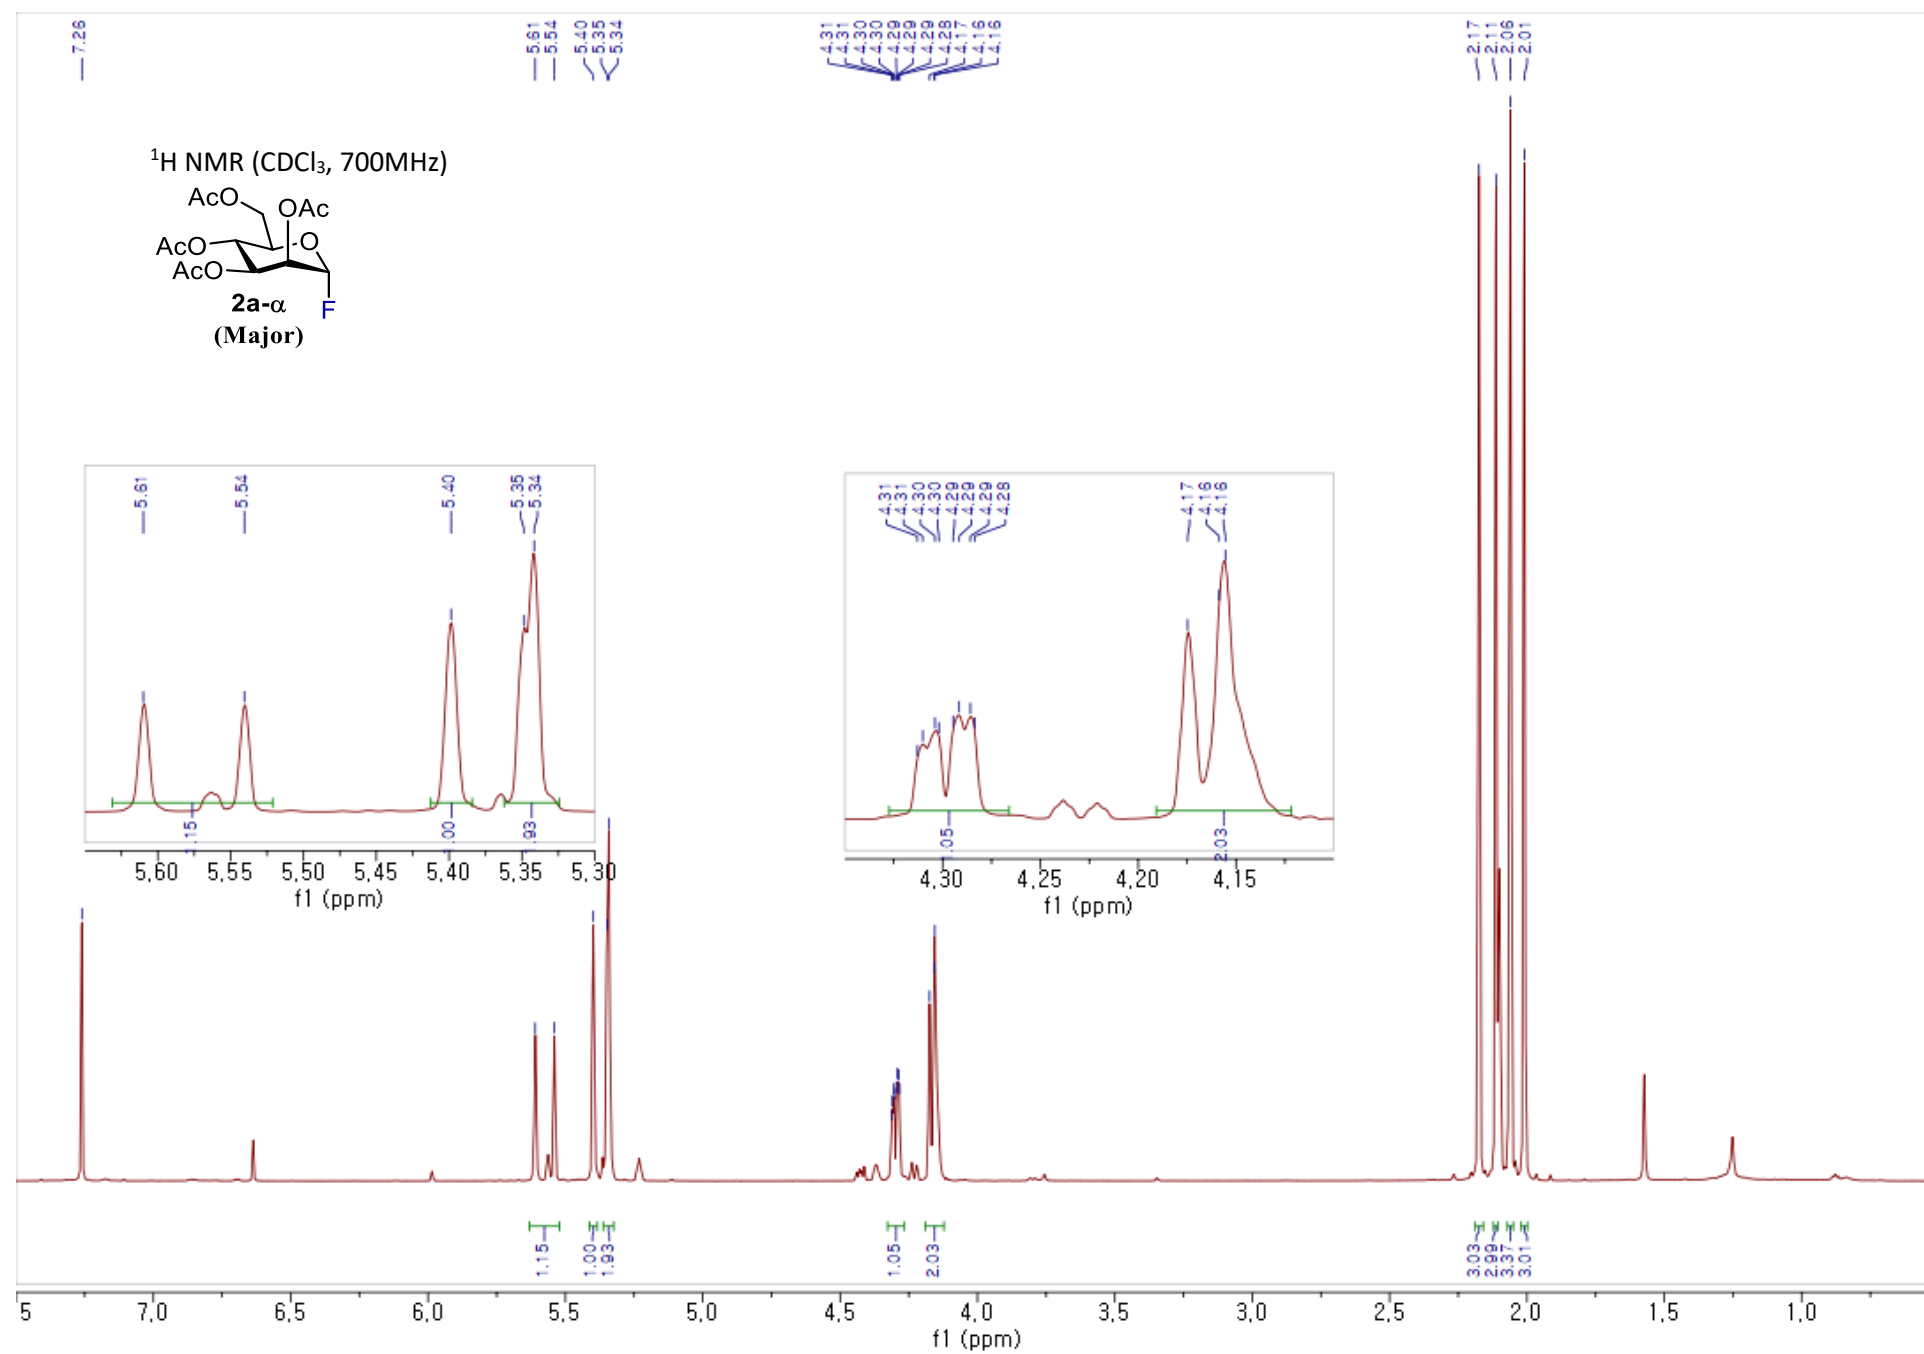

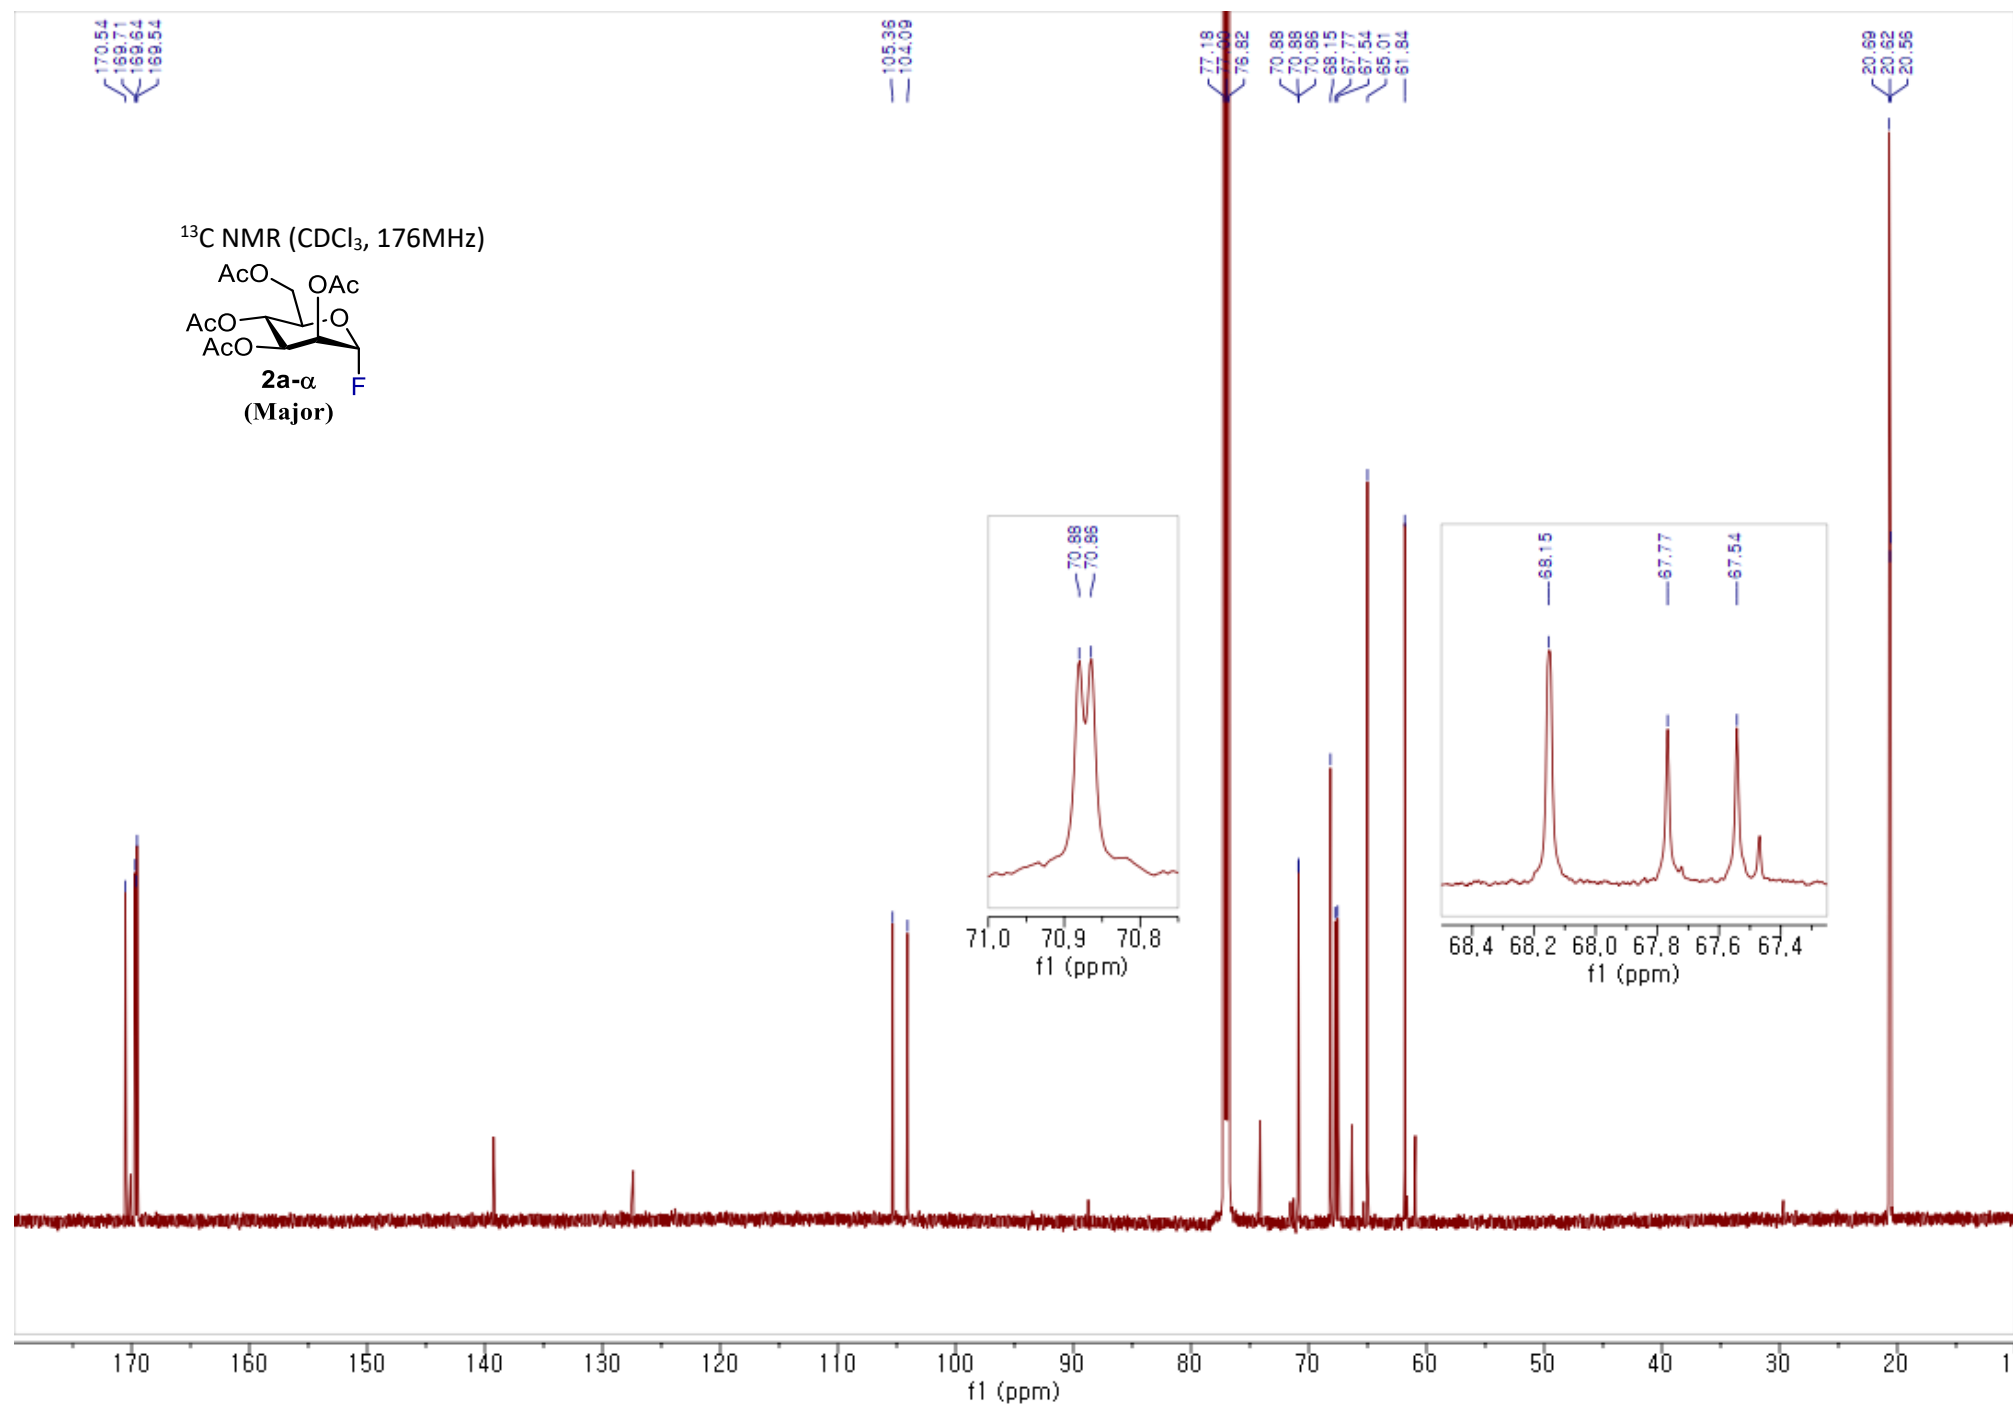

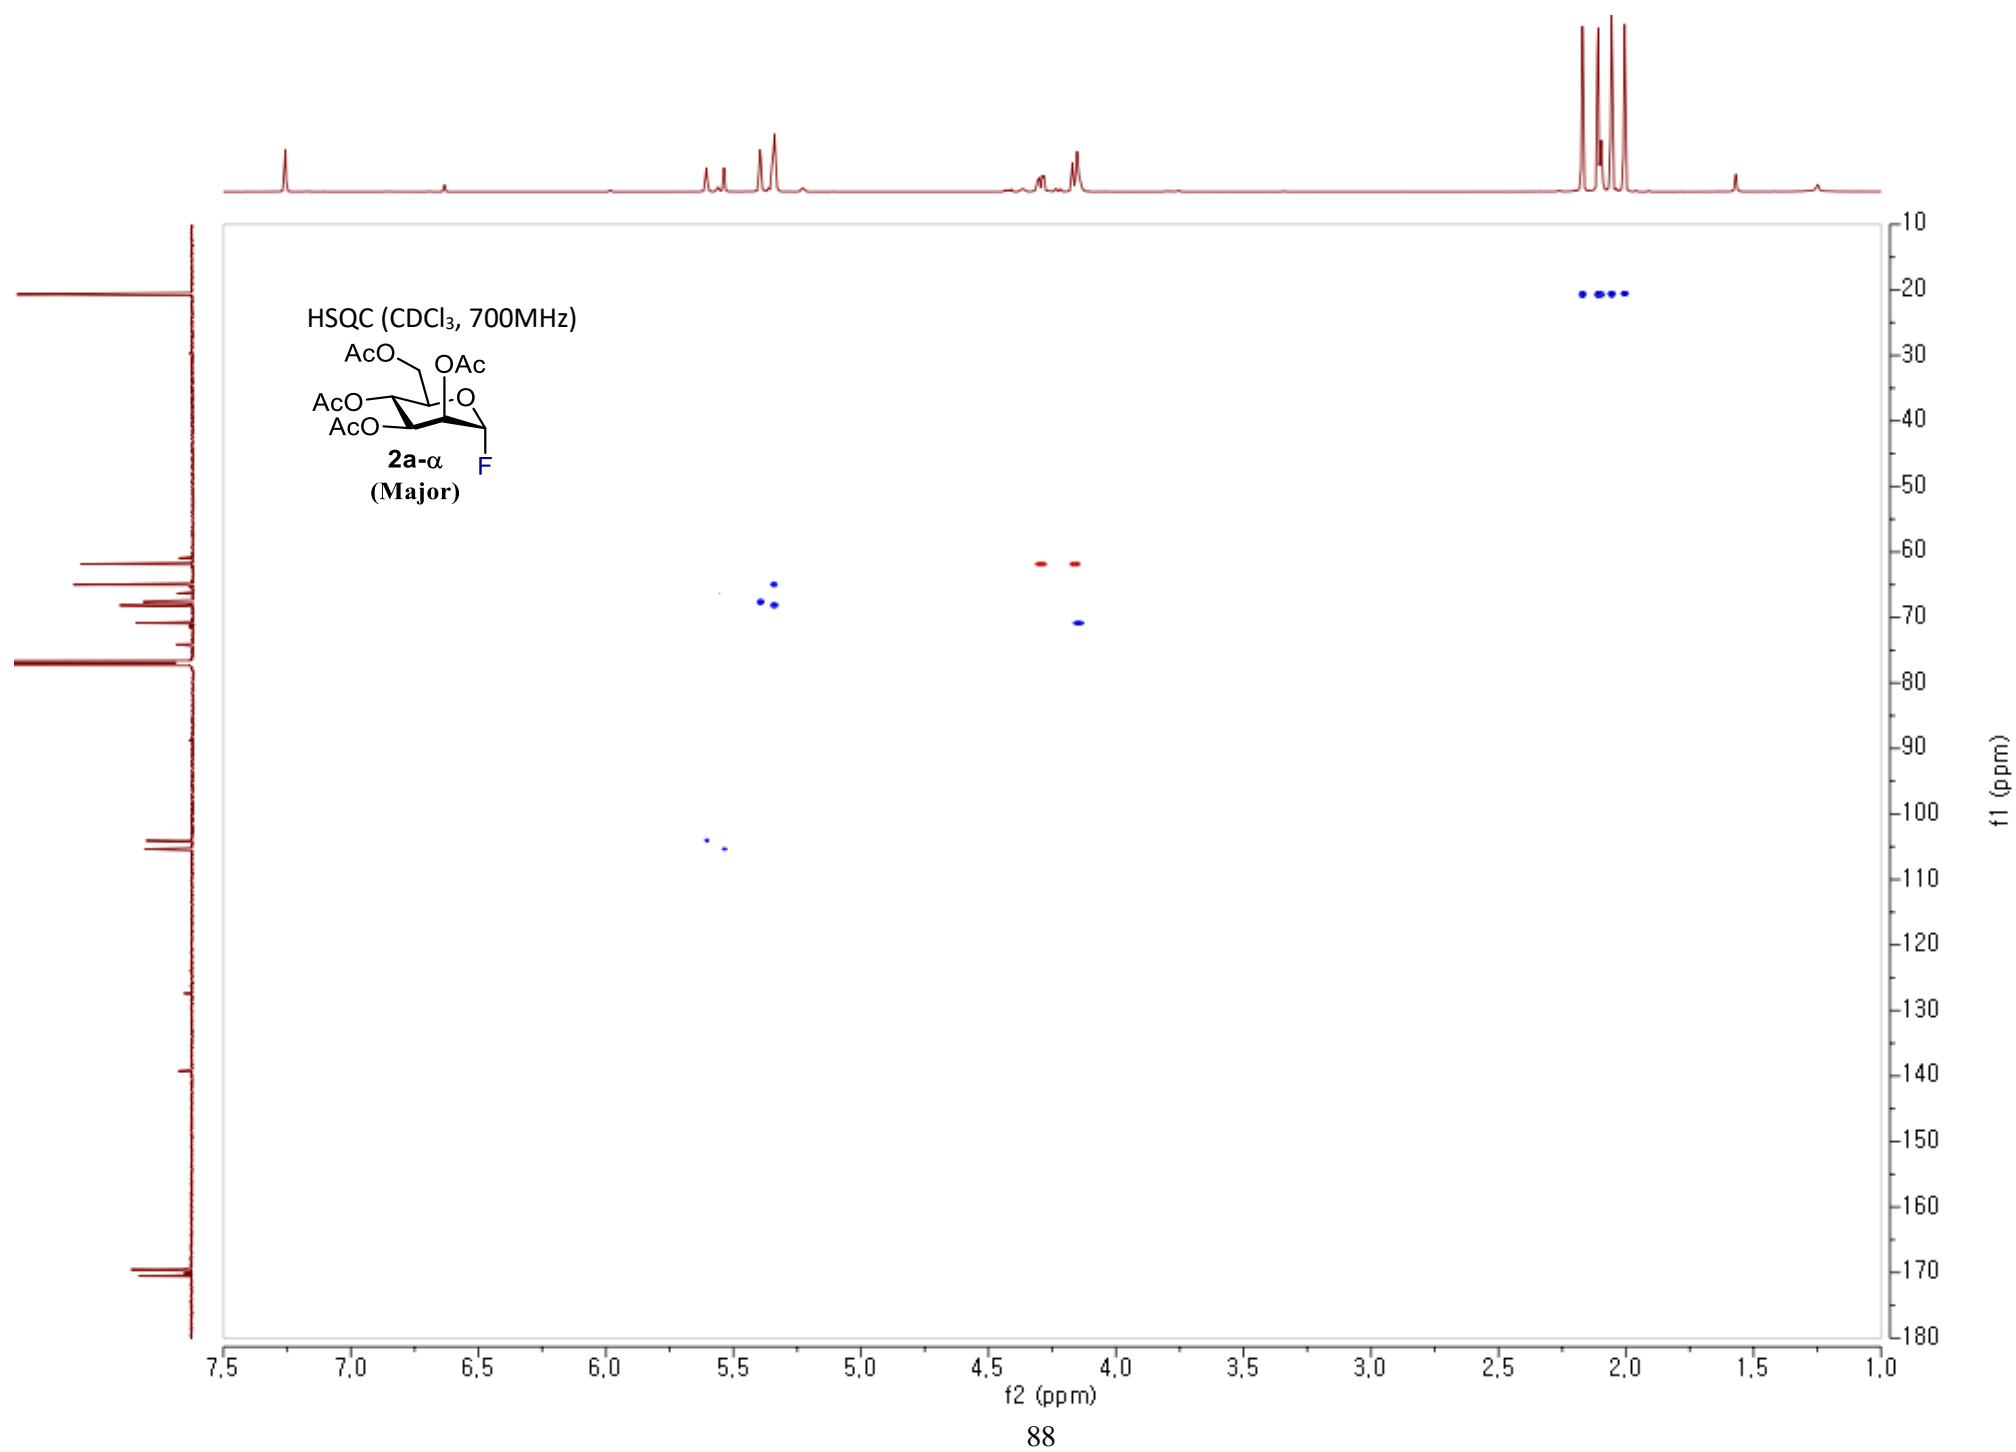

$^{19}\text{F}$  NMR ( $\text{CDCl}_3$ , 471MHz)

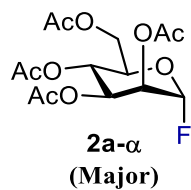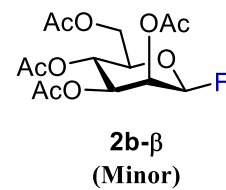

138.31  
138.41

142.16  
142.18  
142.26  
142.29

12.97

1.00

5.0 -135.5 -136.0 -136.5 -137.0 -137.5 -138.0 -138.5 -139.0 -139.5 -140.0 -140.5 -141.0 -141.5 -142.0 -142.5 -143.0 -143.5 -144.0 -144.5 -14

f1 (ppm)

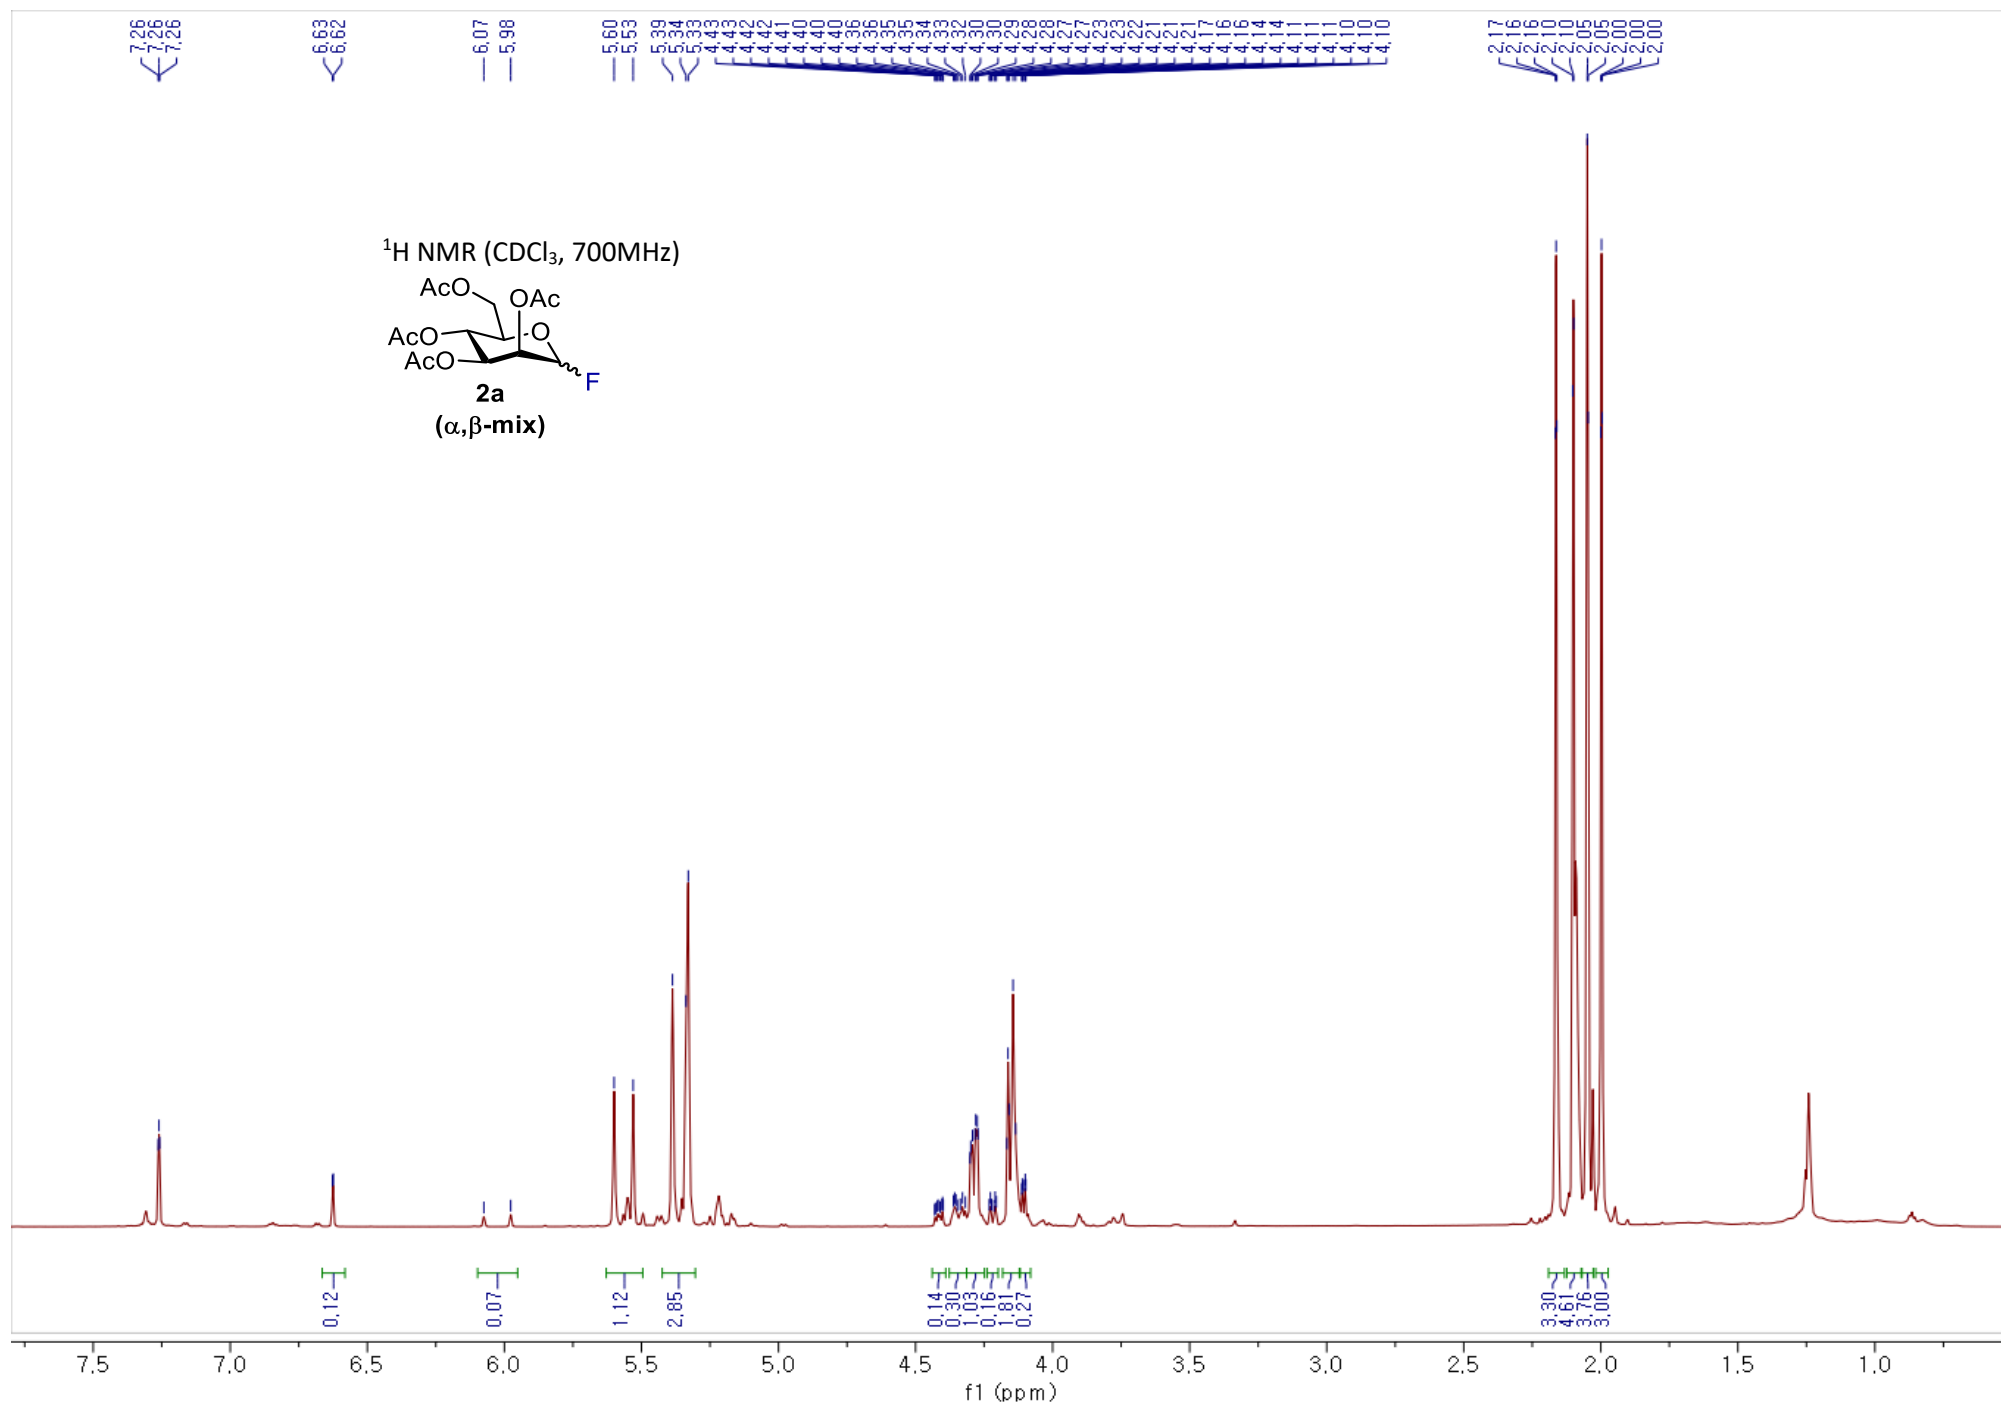

2,3,4,6-Tetra-*O*-acetyl- $\beta$ -D-glucopyranosyl fluoride (2b- $\beta$ , Major diastereomer)

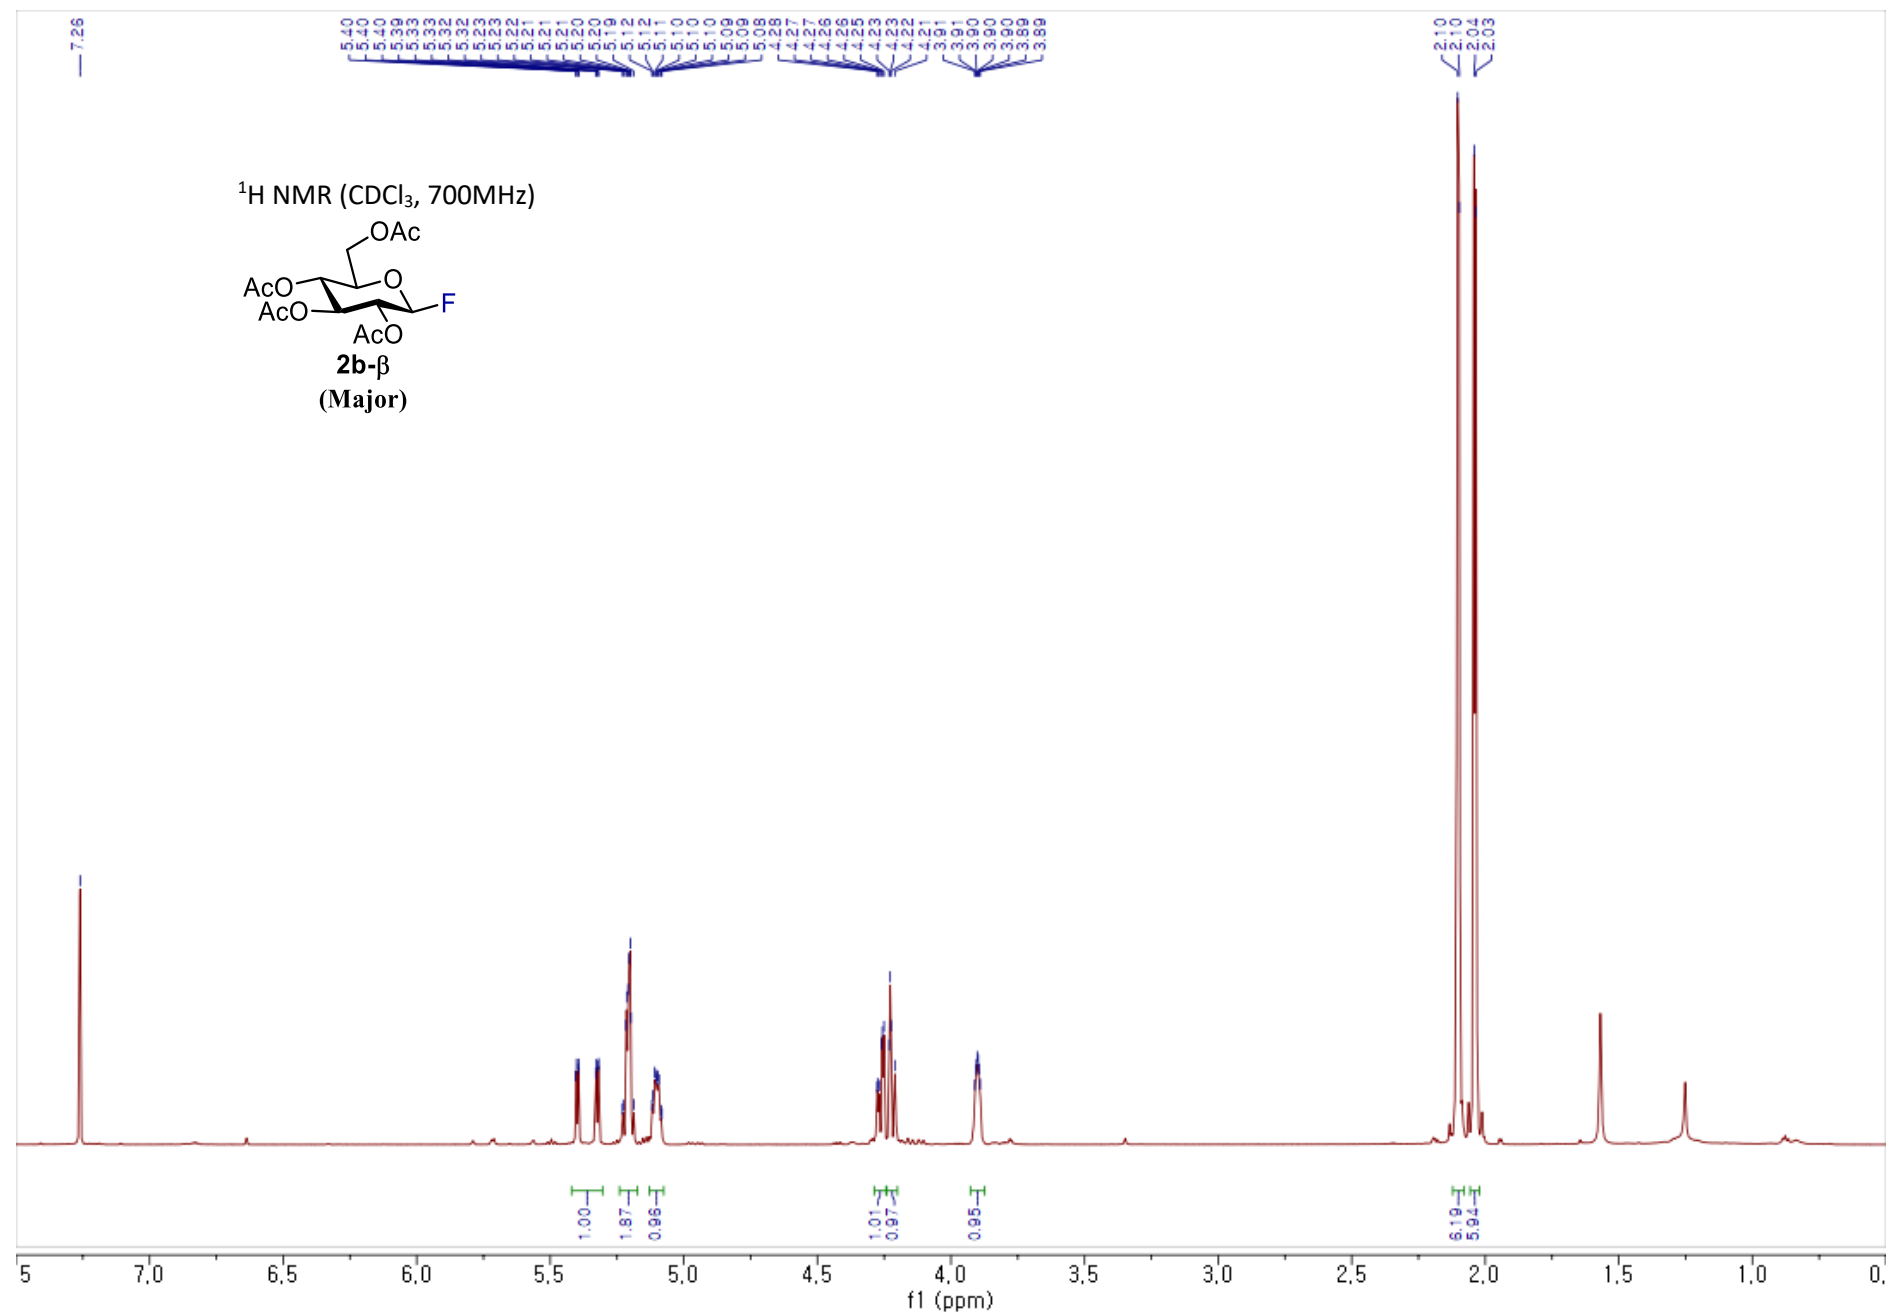

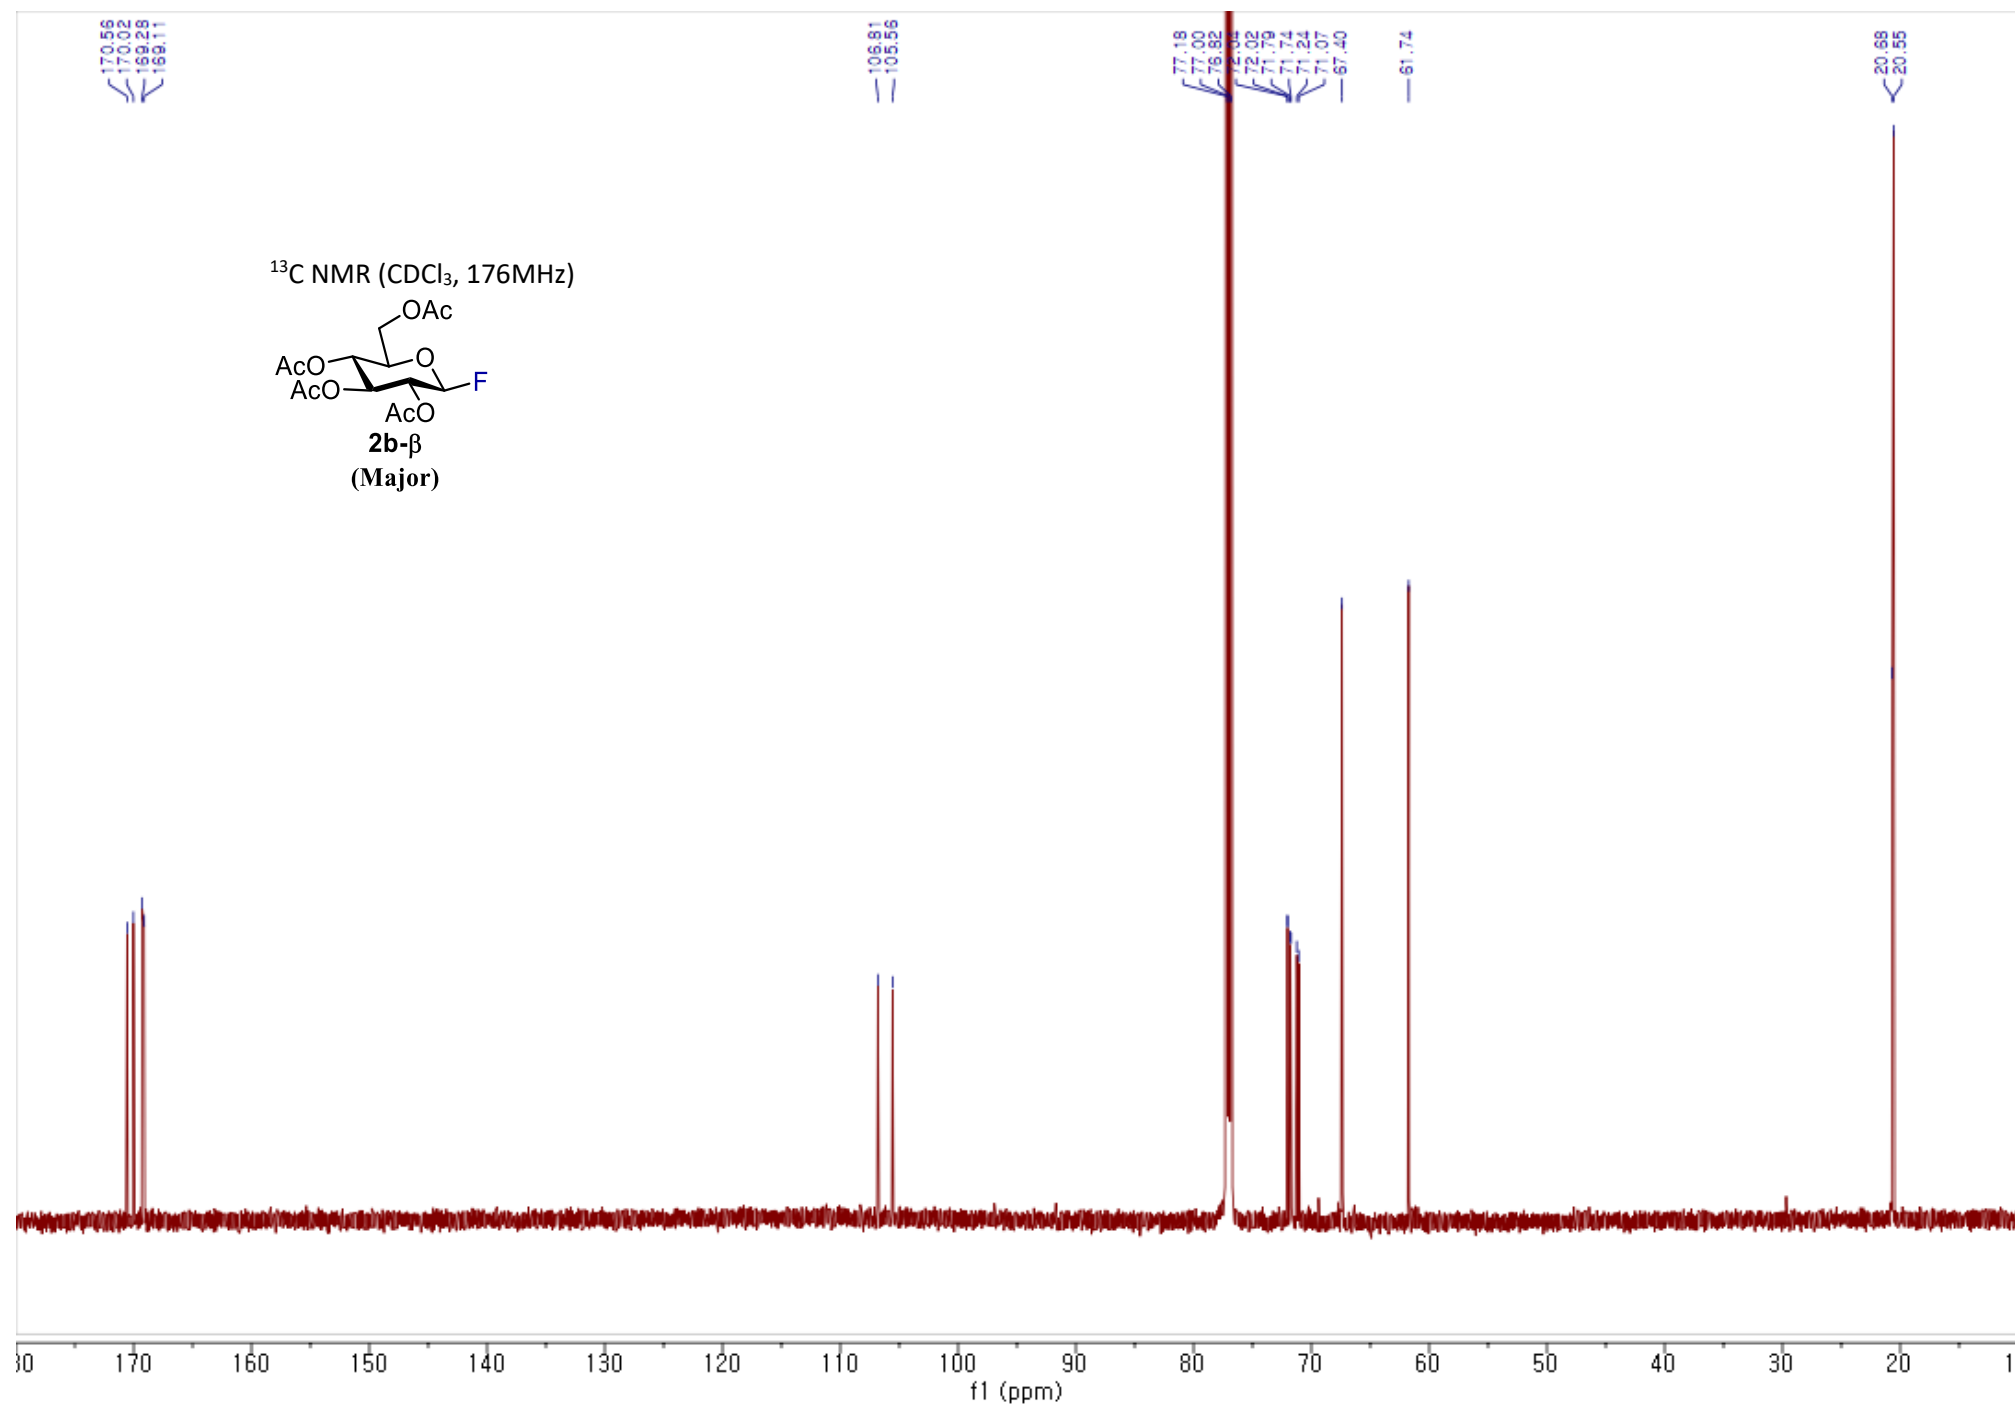

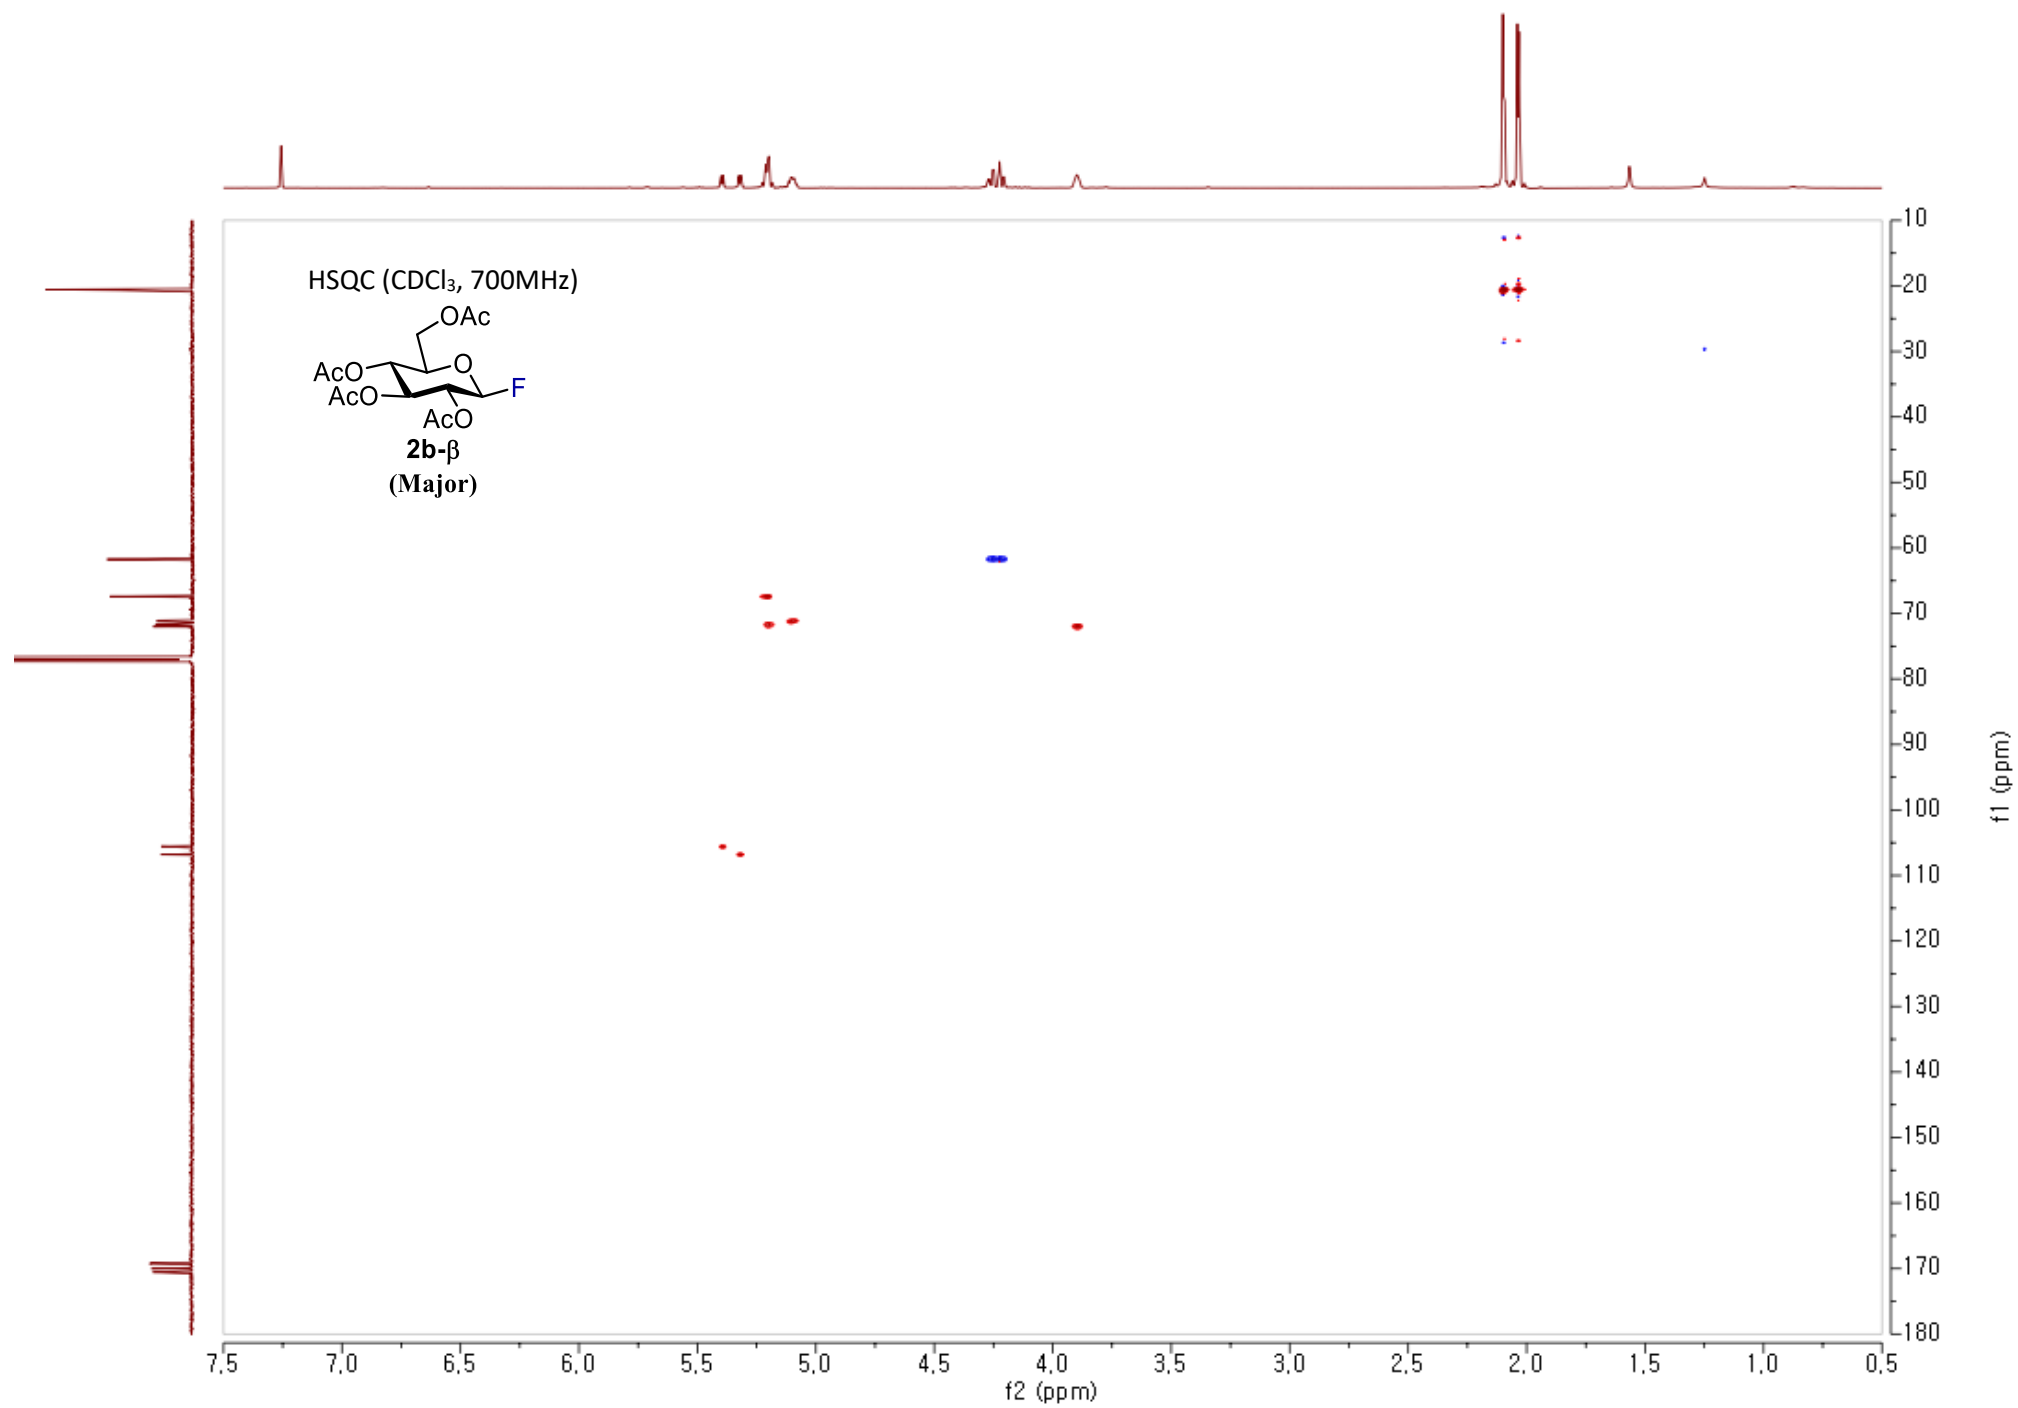

2,3,4,6-Tetra-*O*-acetyl- $\alpha$ -D-glucopyranosyl fluoride (**2b- $\alpha$** , Minor diastereomer)

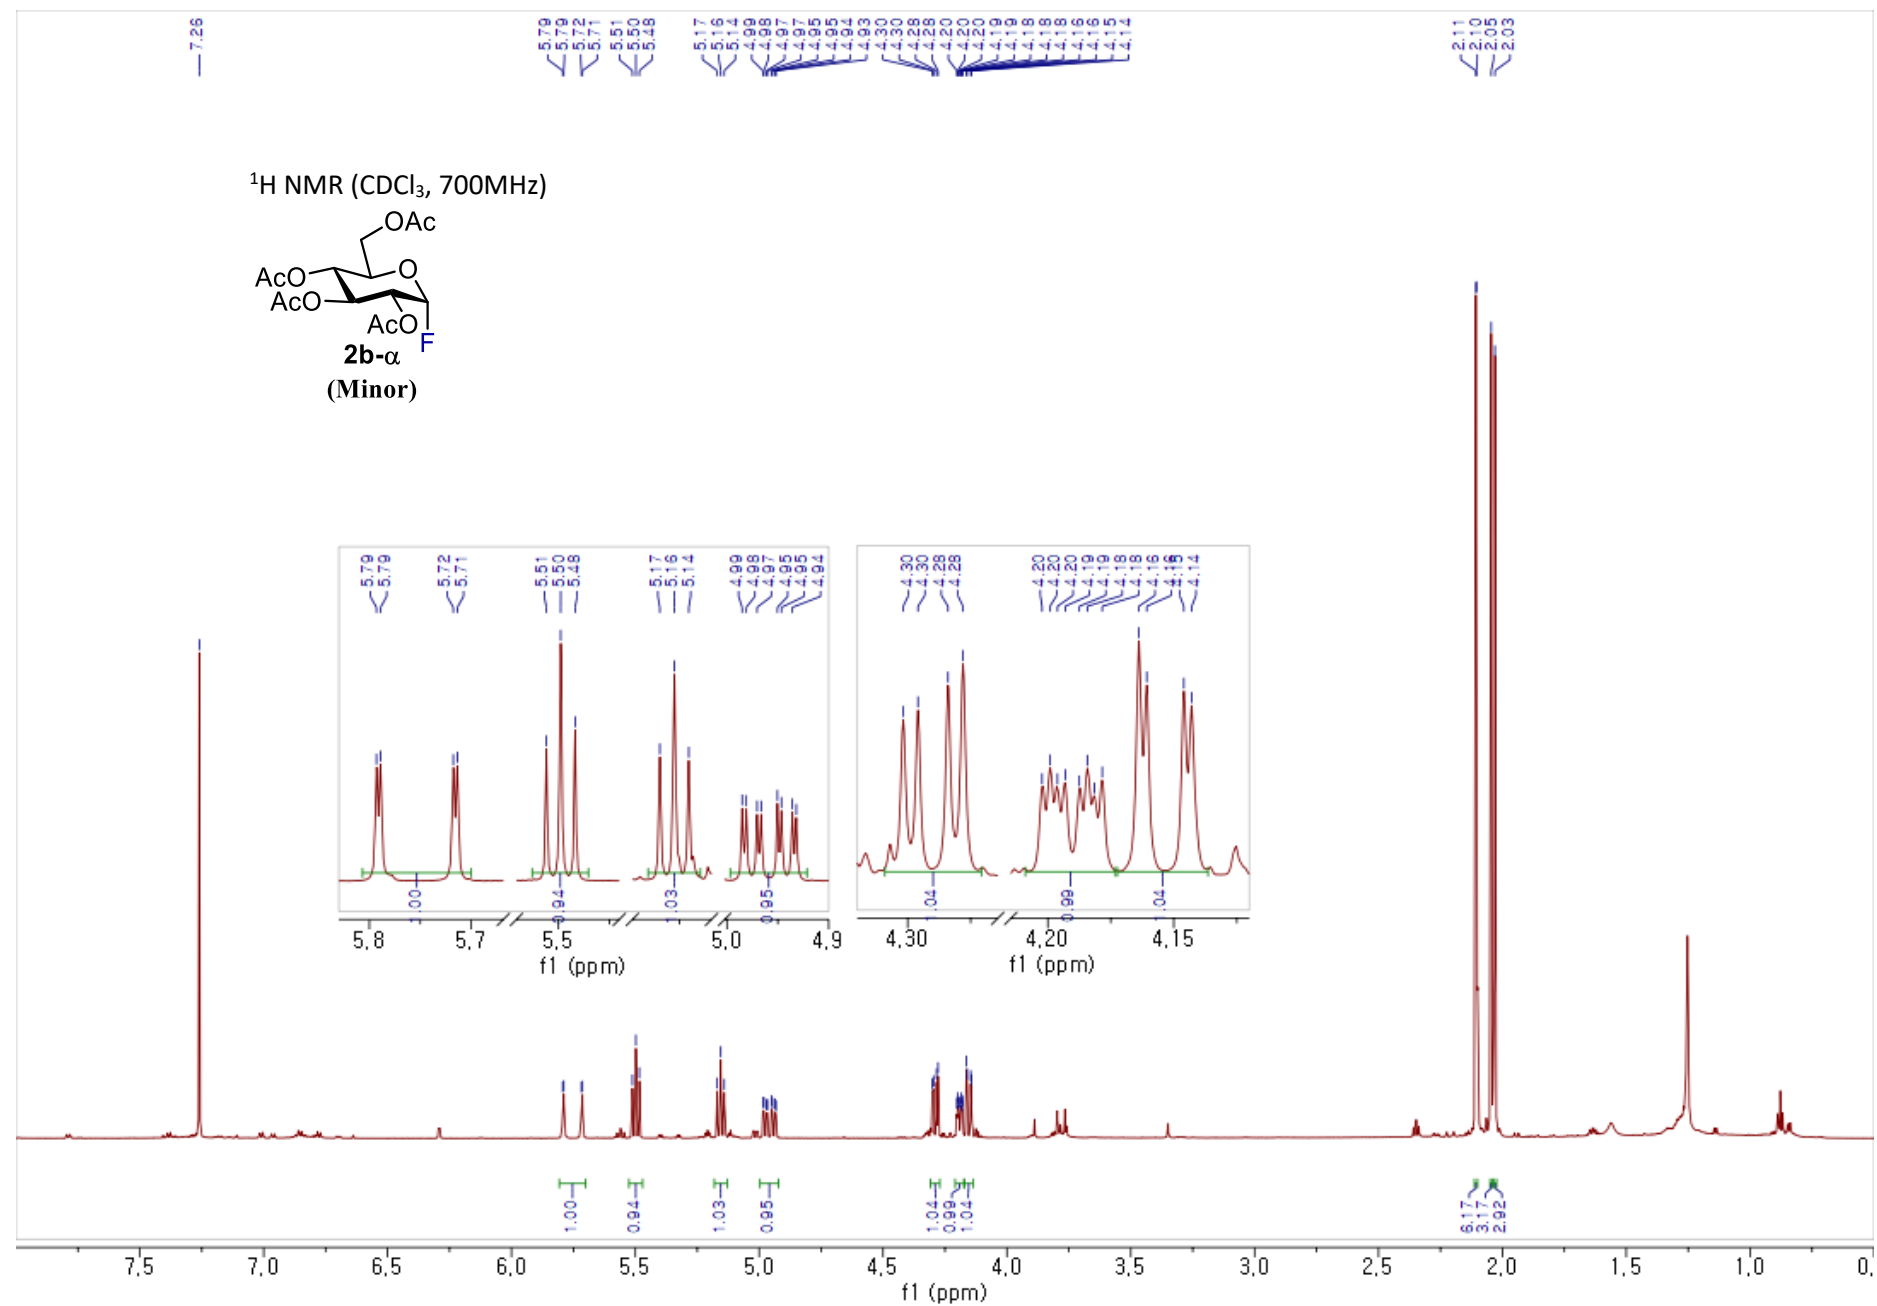

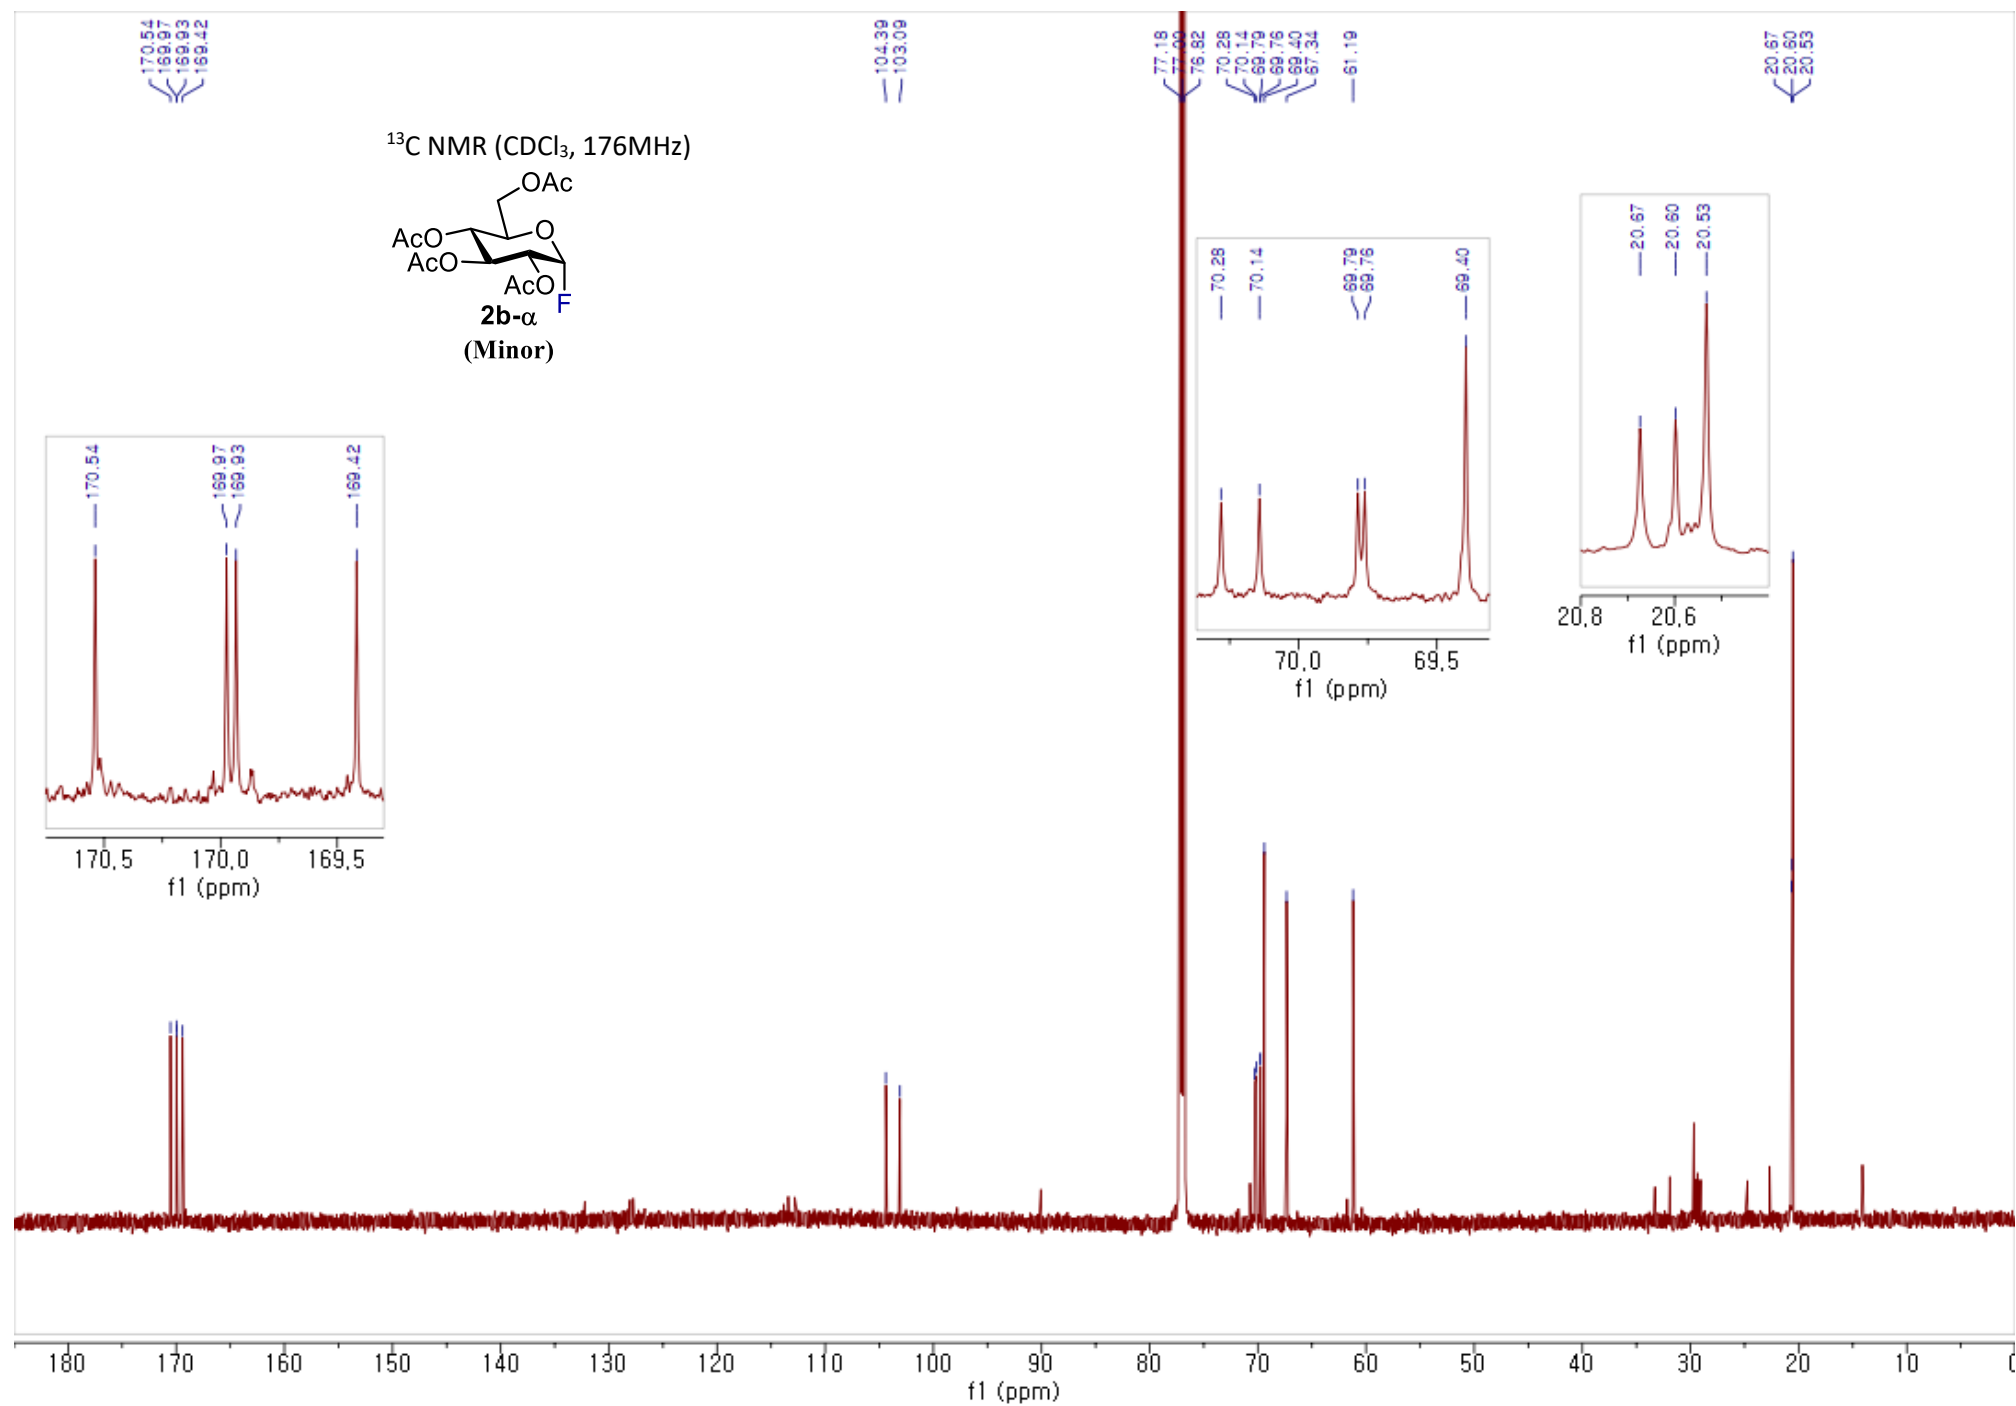

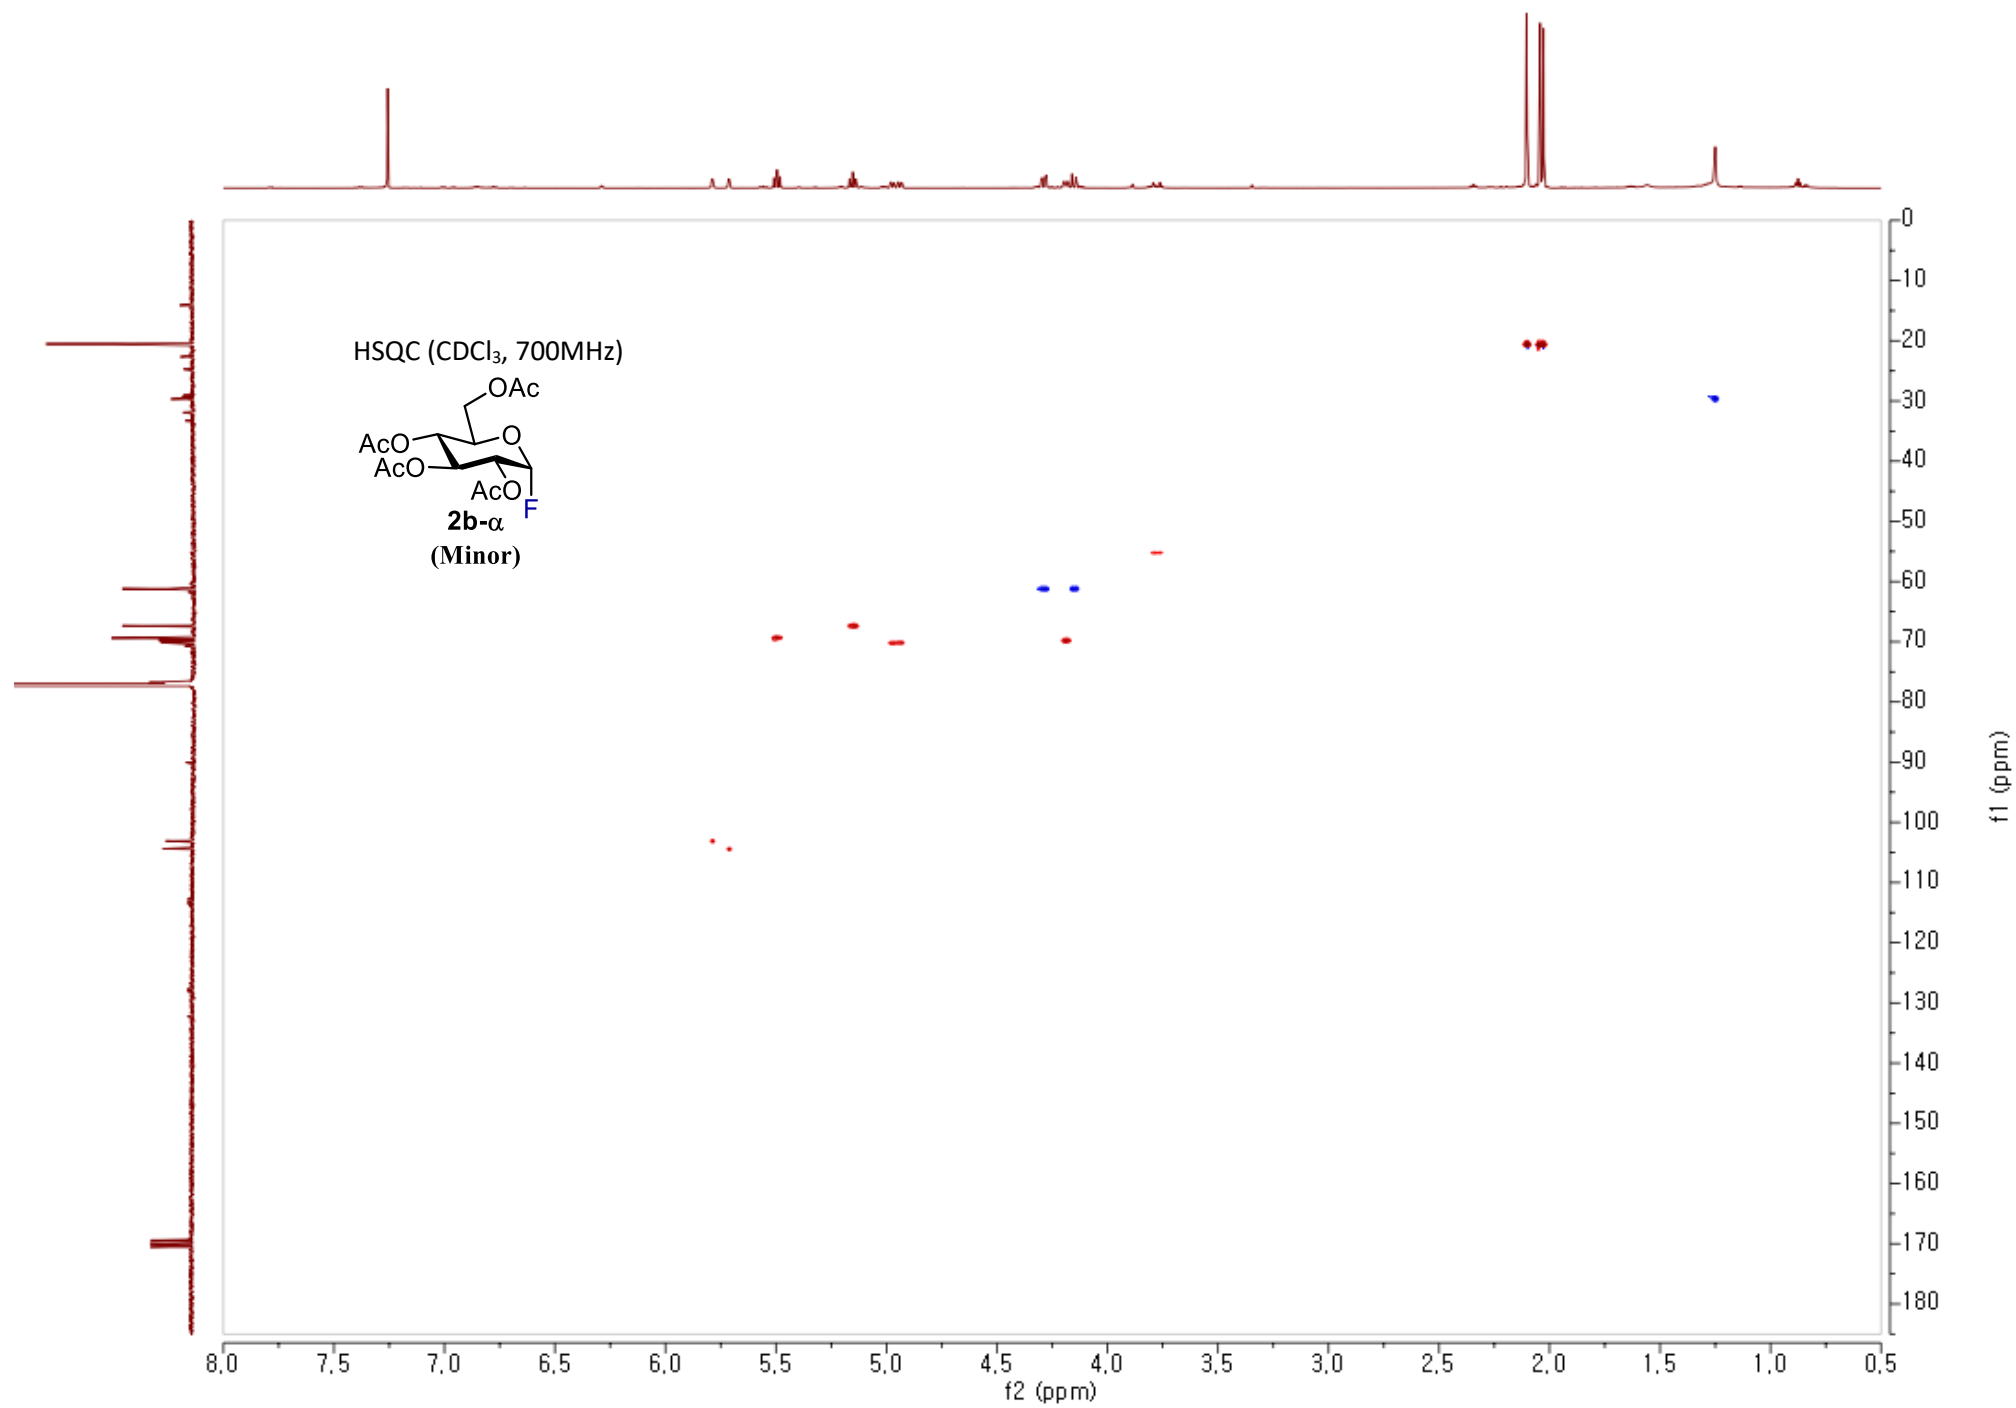

$^{19}\text{F}$  NMR ( $\text{CDCl}_3$ , 471MHz)

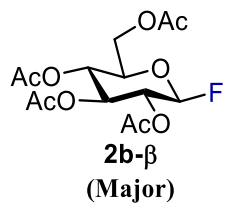

-137.04  
-137.06  
-137.15  
-137.17

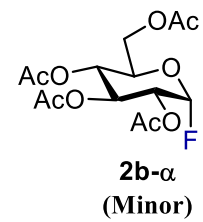

-149.67  
-149.72  
-149.78  
-149.89

5.15

1.00

f1 (ppm)

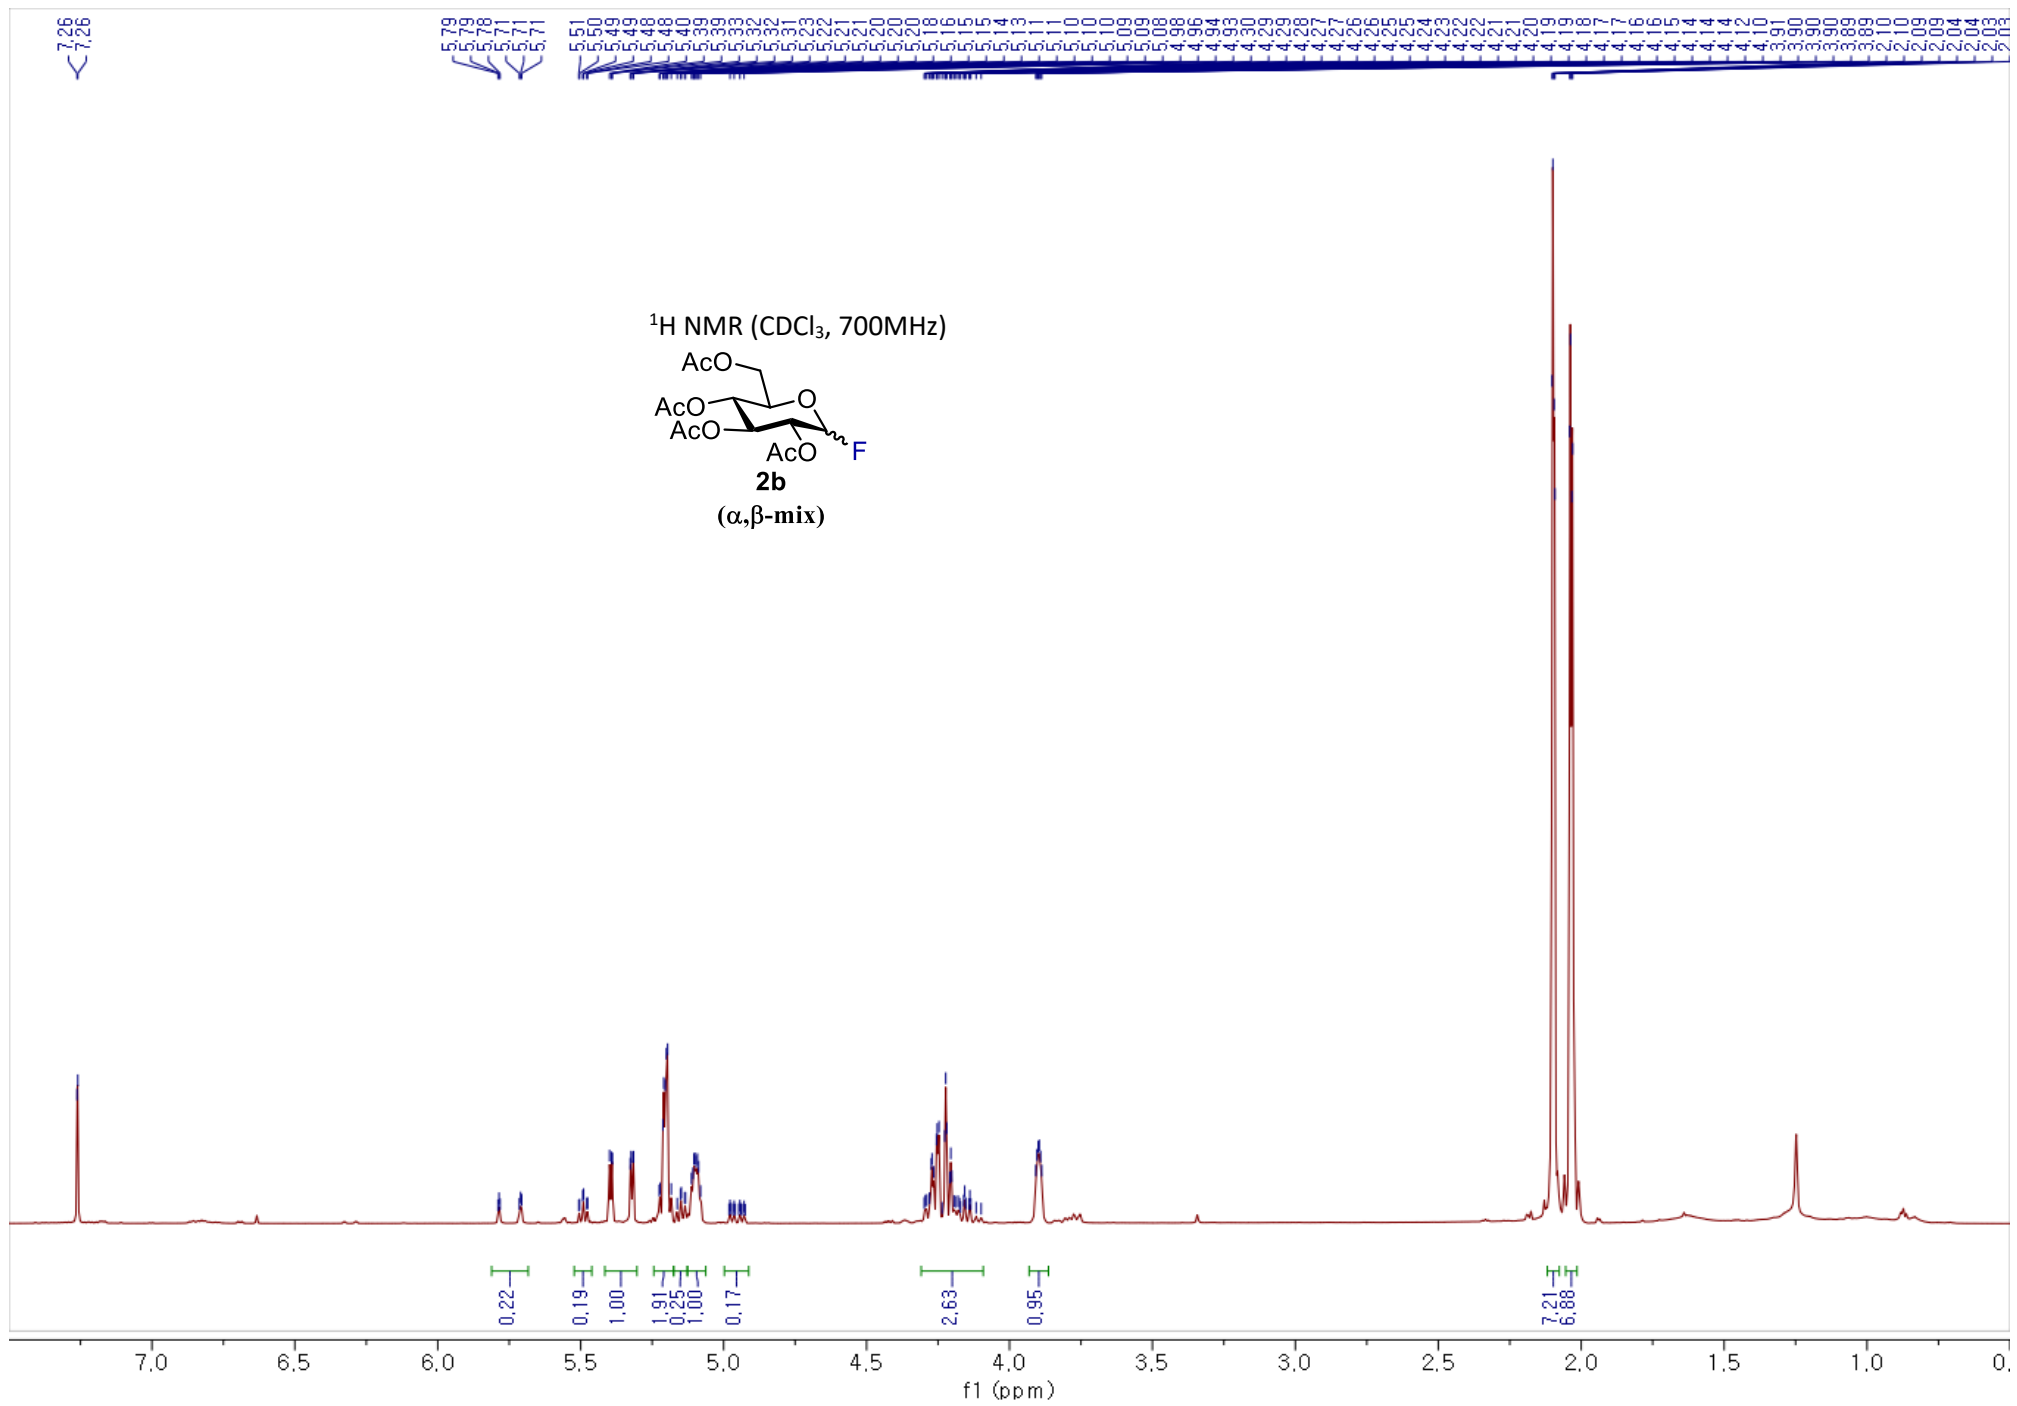

2,3,4,6-Tetra-*O*-acetyl- $\beta$ -D-galactopyranosyl fluoride (2c- $\beta$ , Major diastereomer)

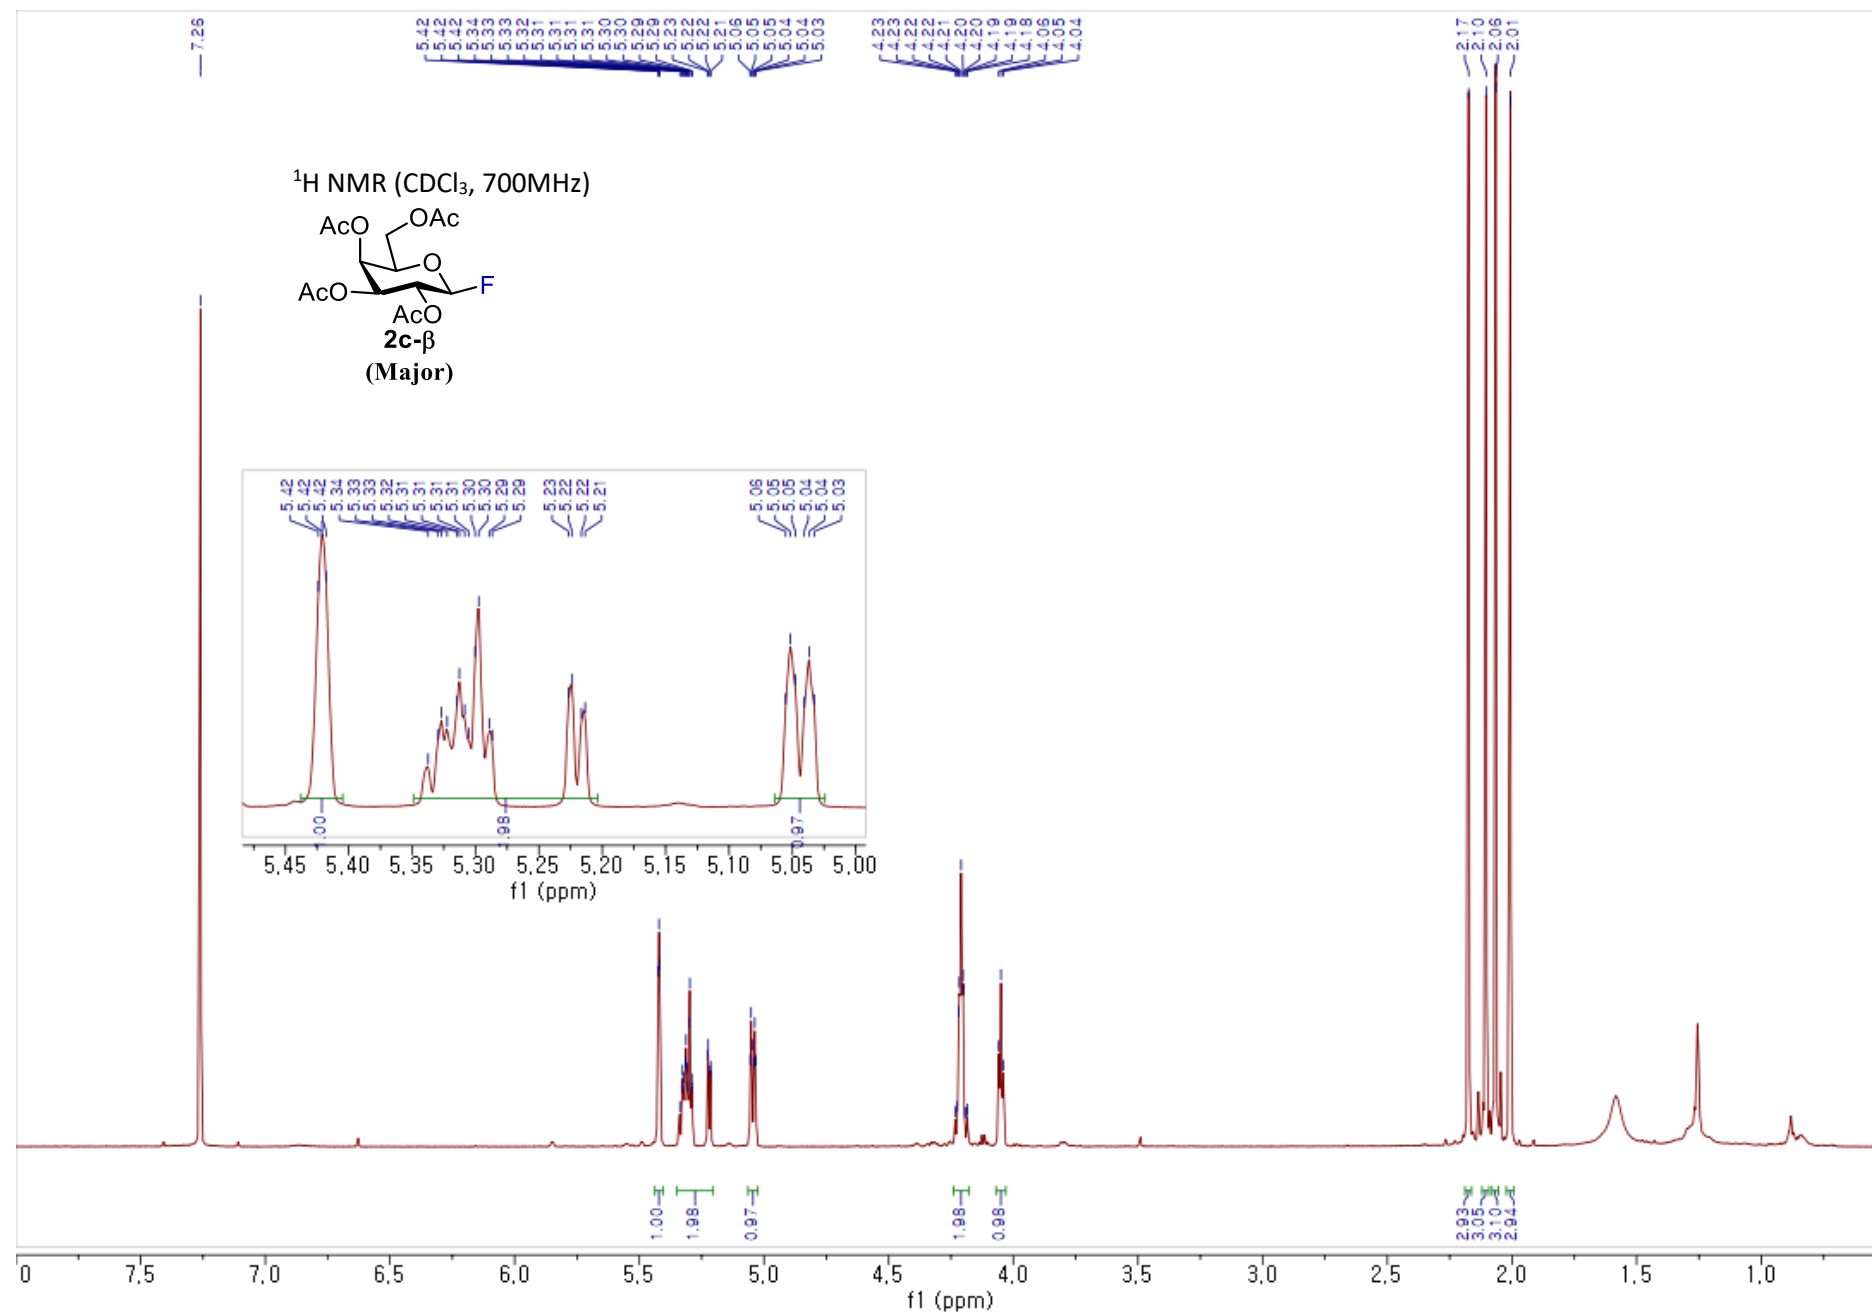

<sup>13</sup>C NMR (CDCl<sub>3</sub>, 176MHz)

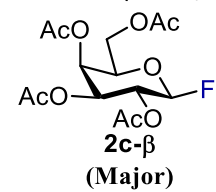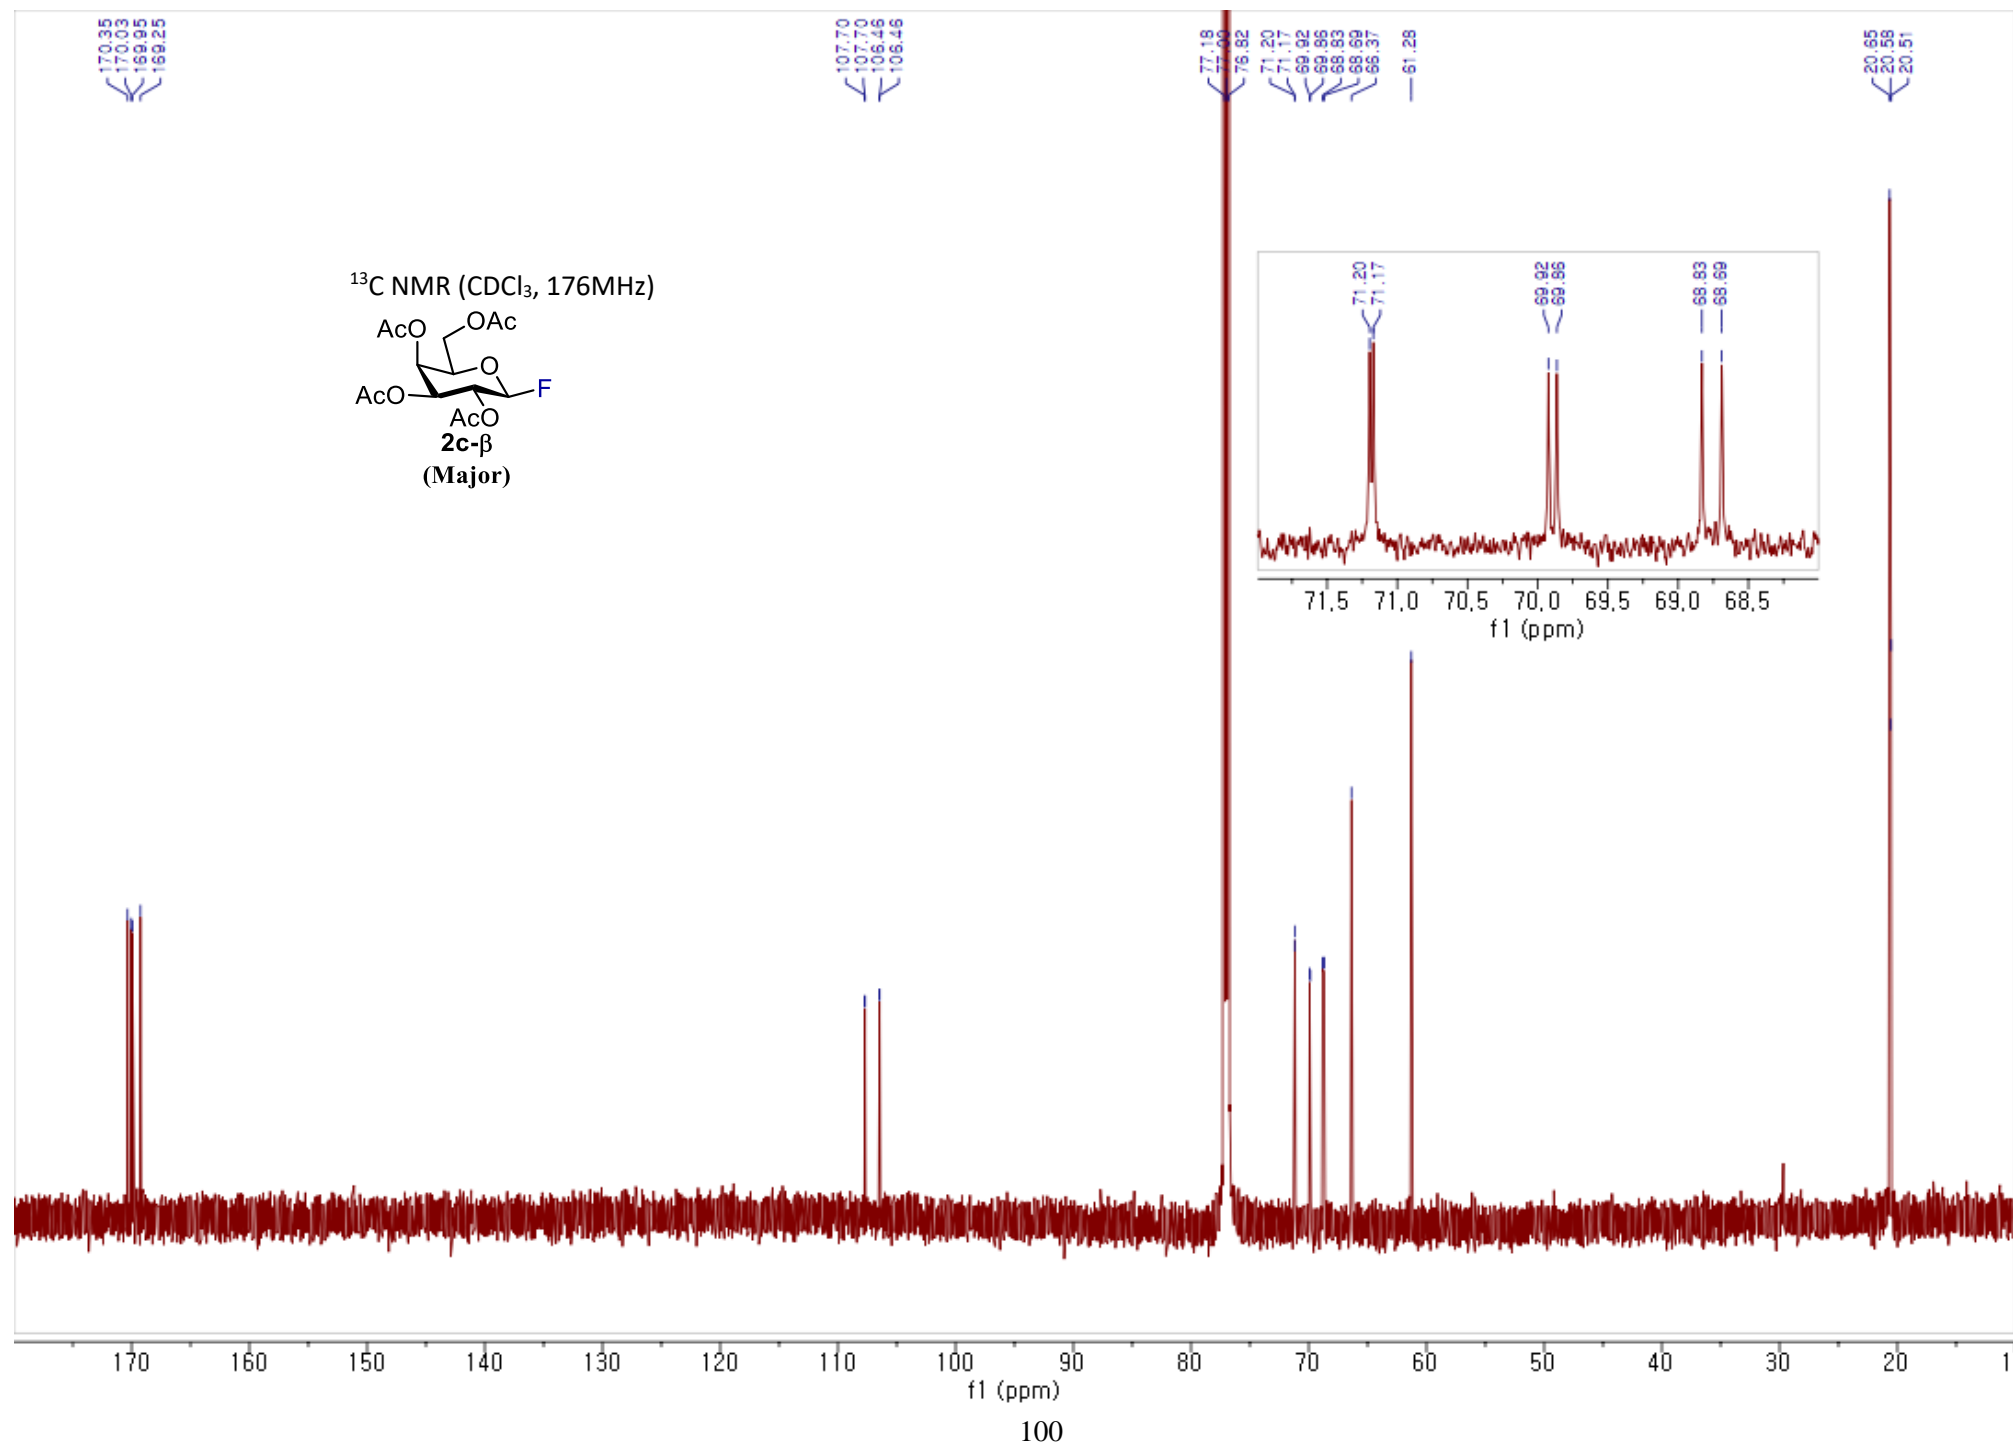

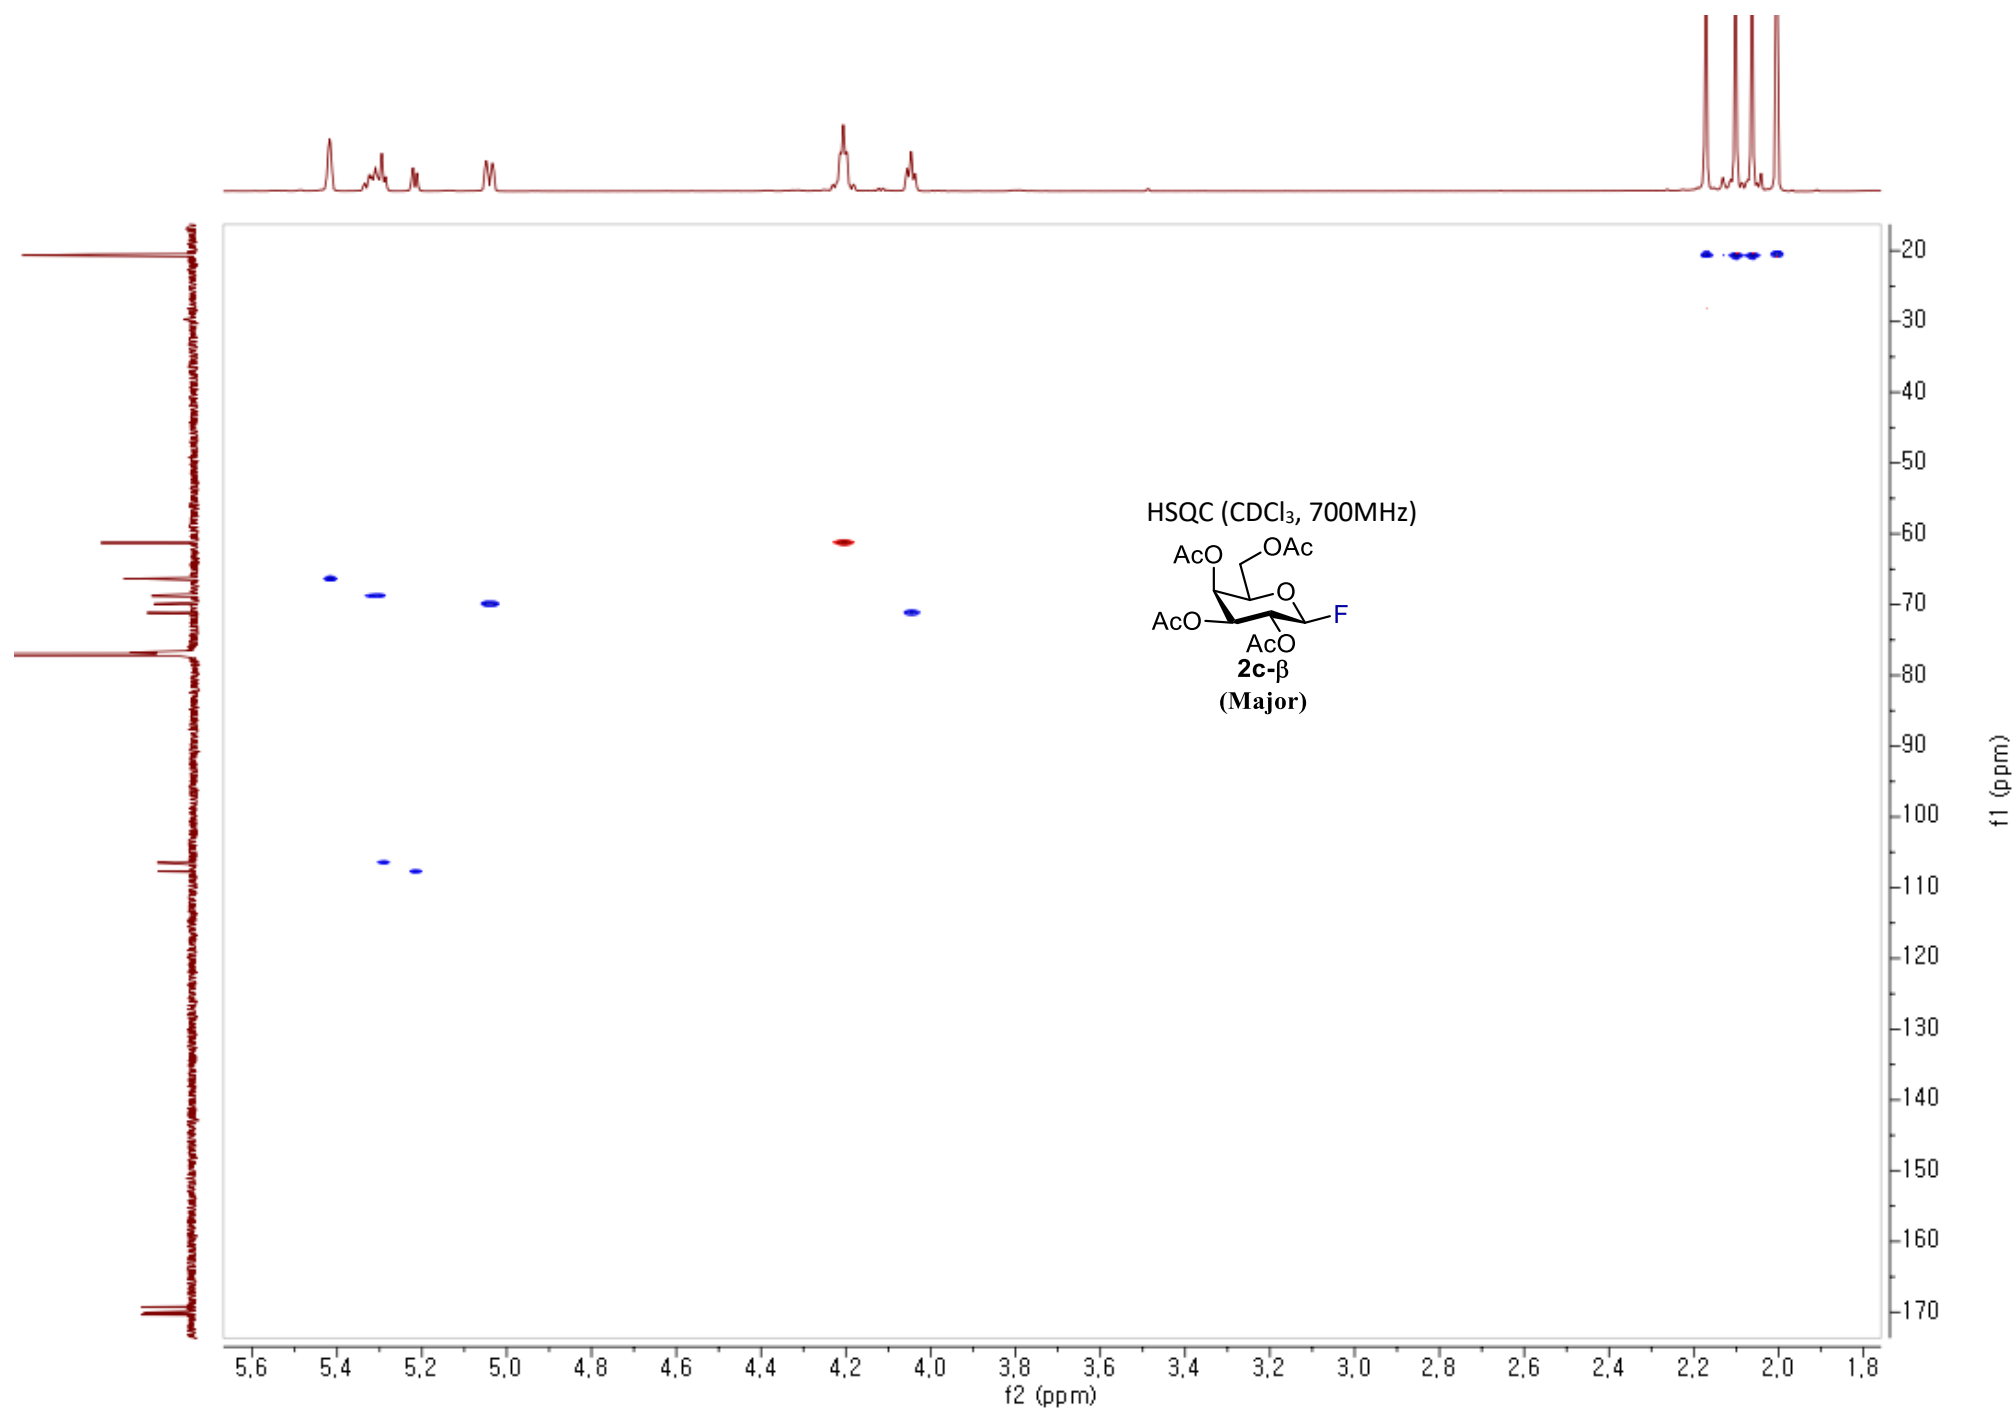

2,3,4,6-Tetra-*O*-acetyl- $\alpha$ -D-galactopyranosyl fluoride (**2c- $\alpha$** , Minor diastereomer)

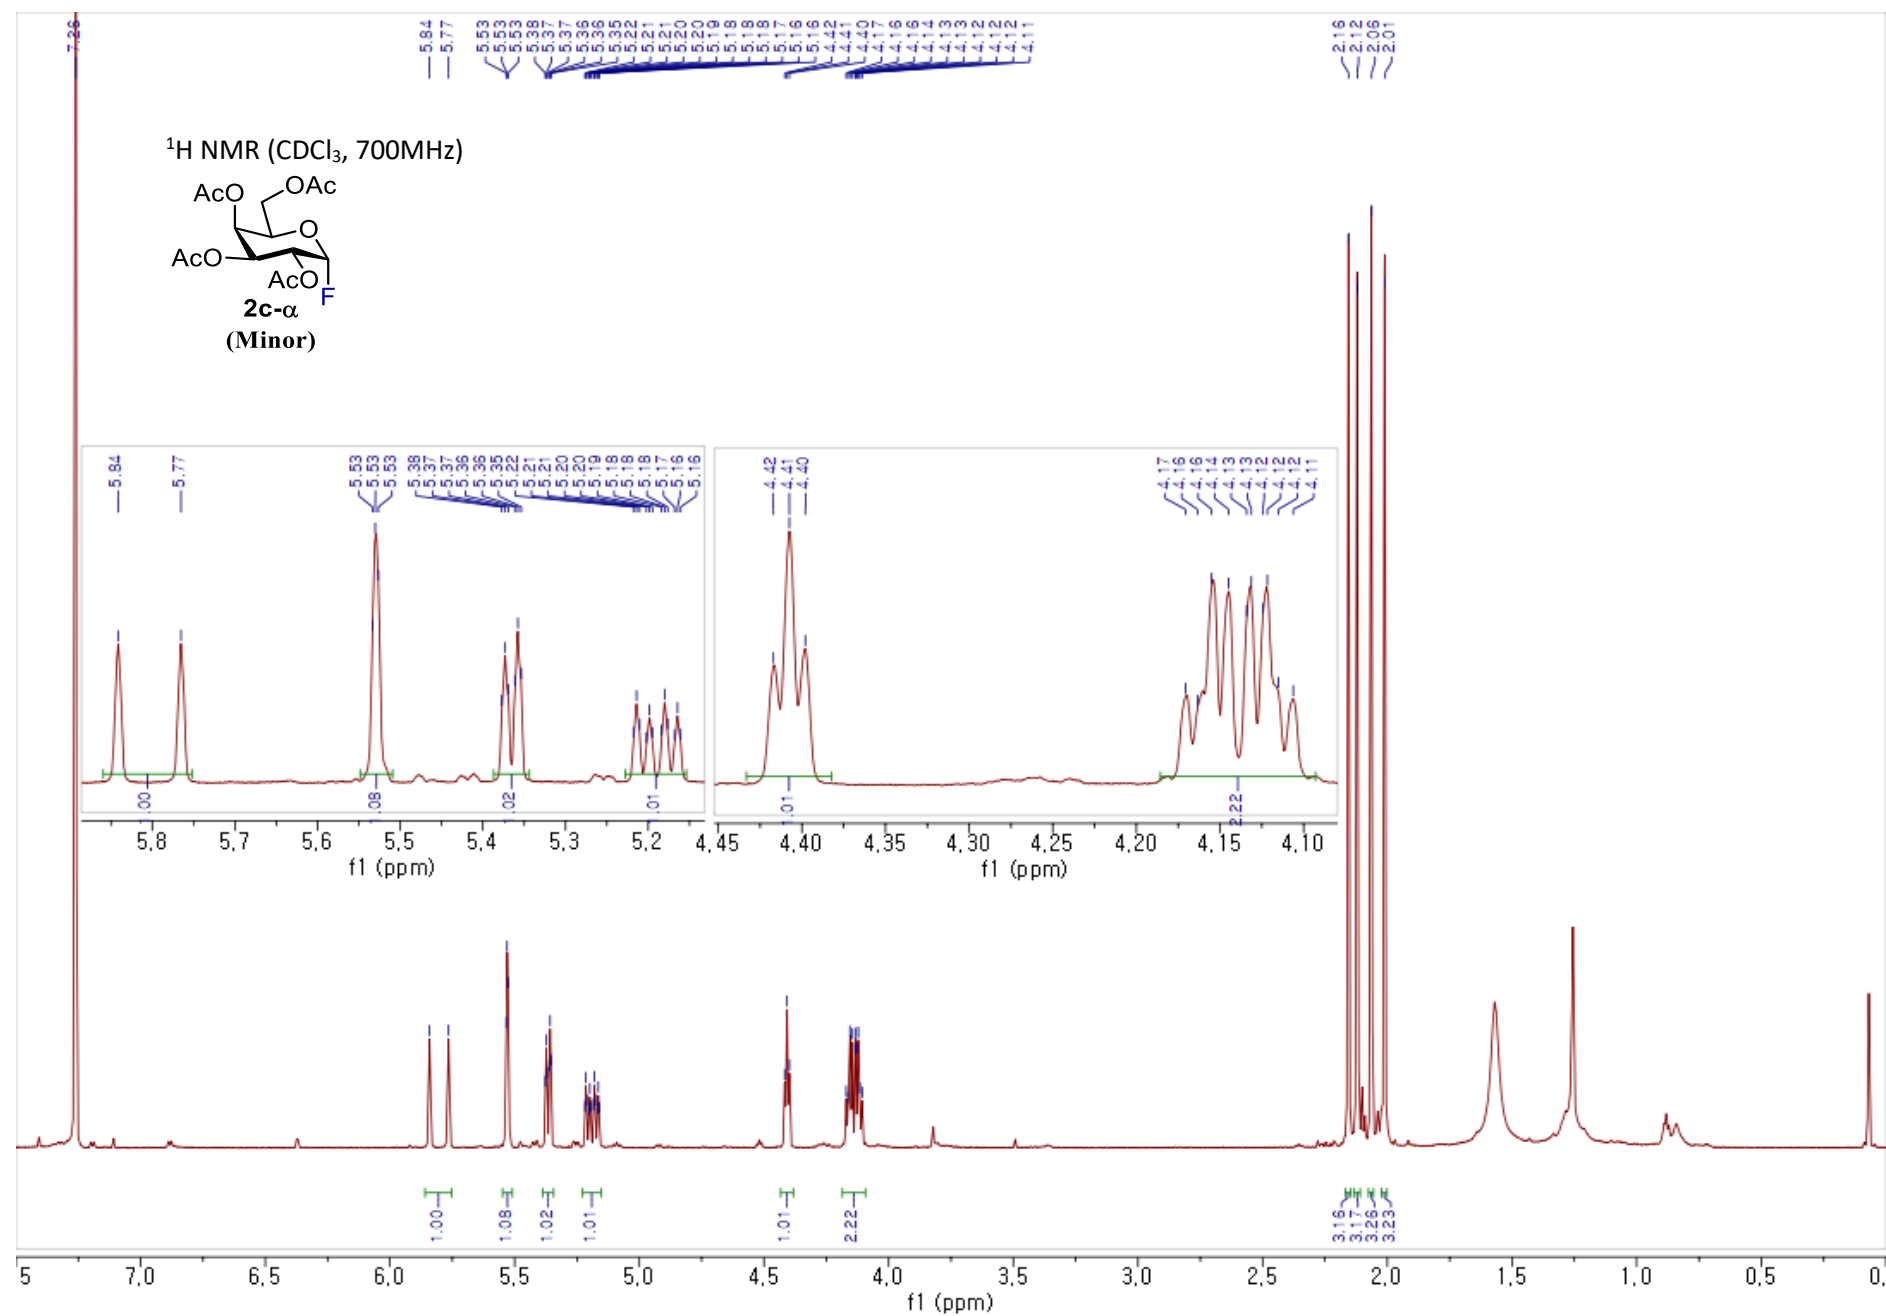

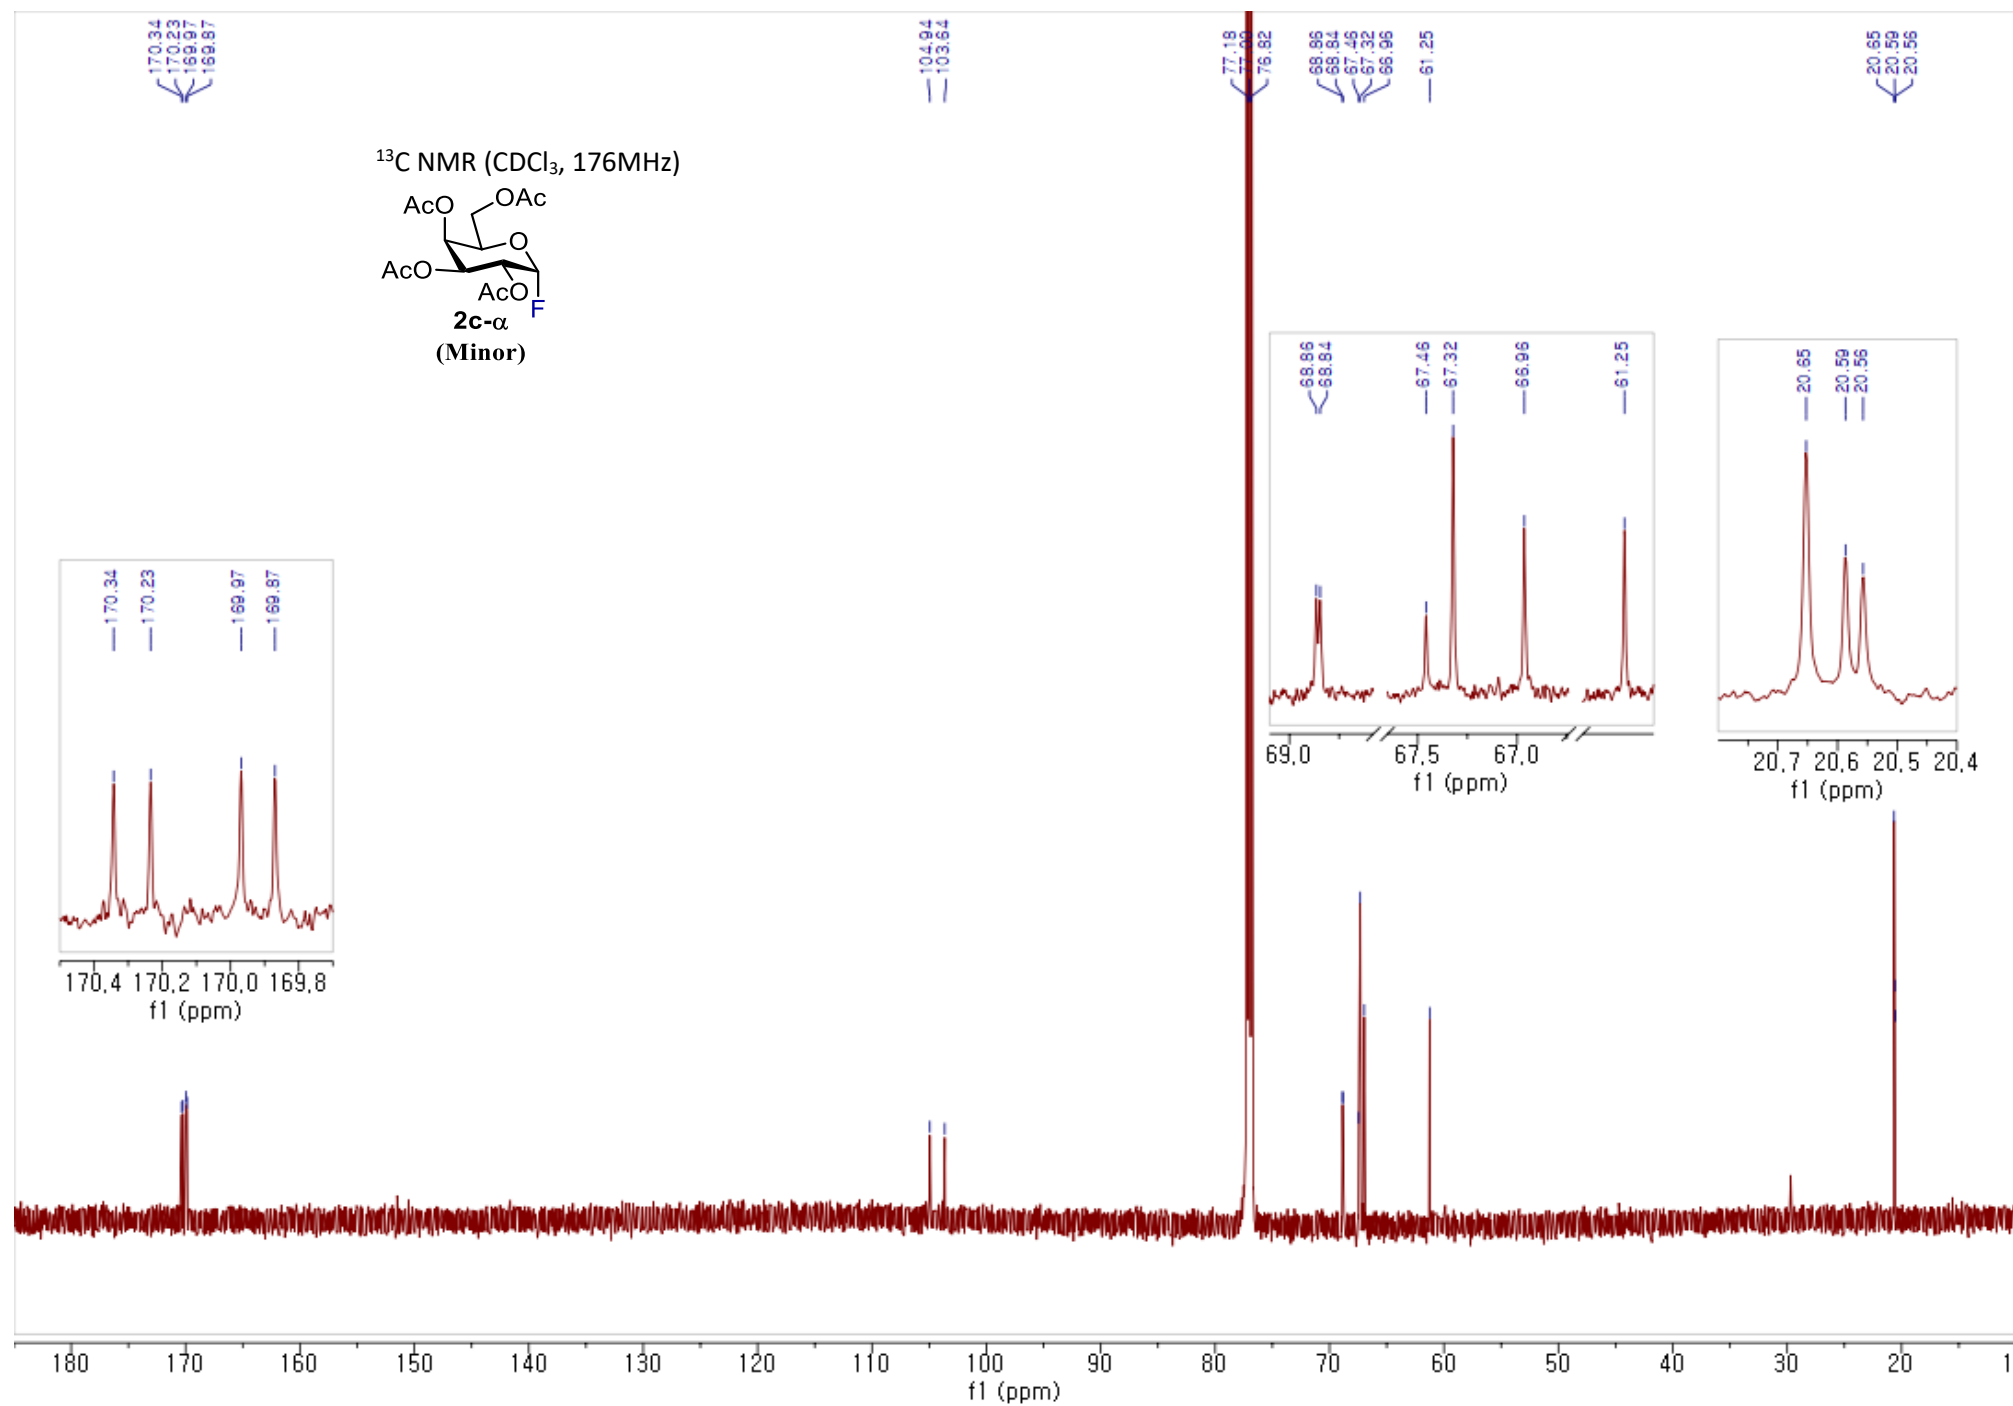

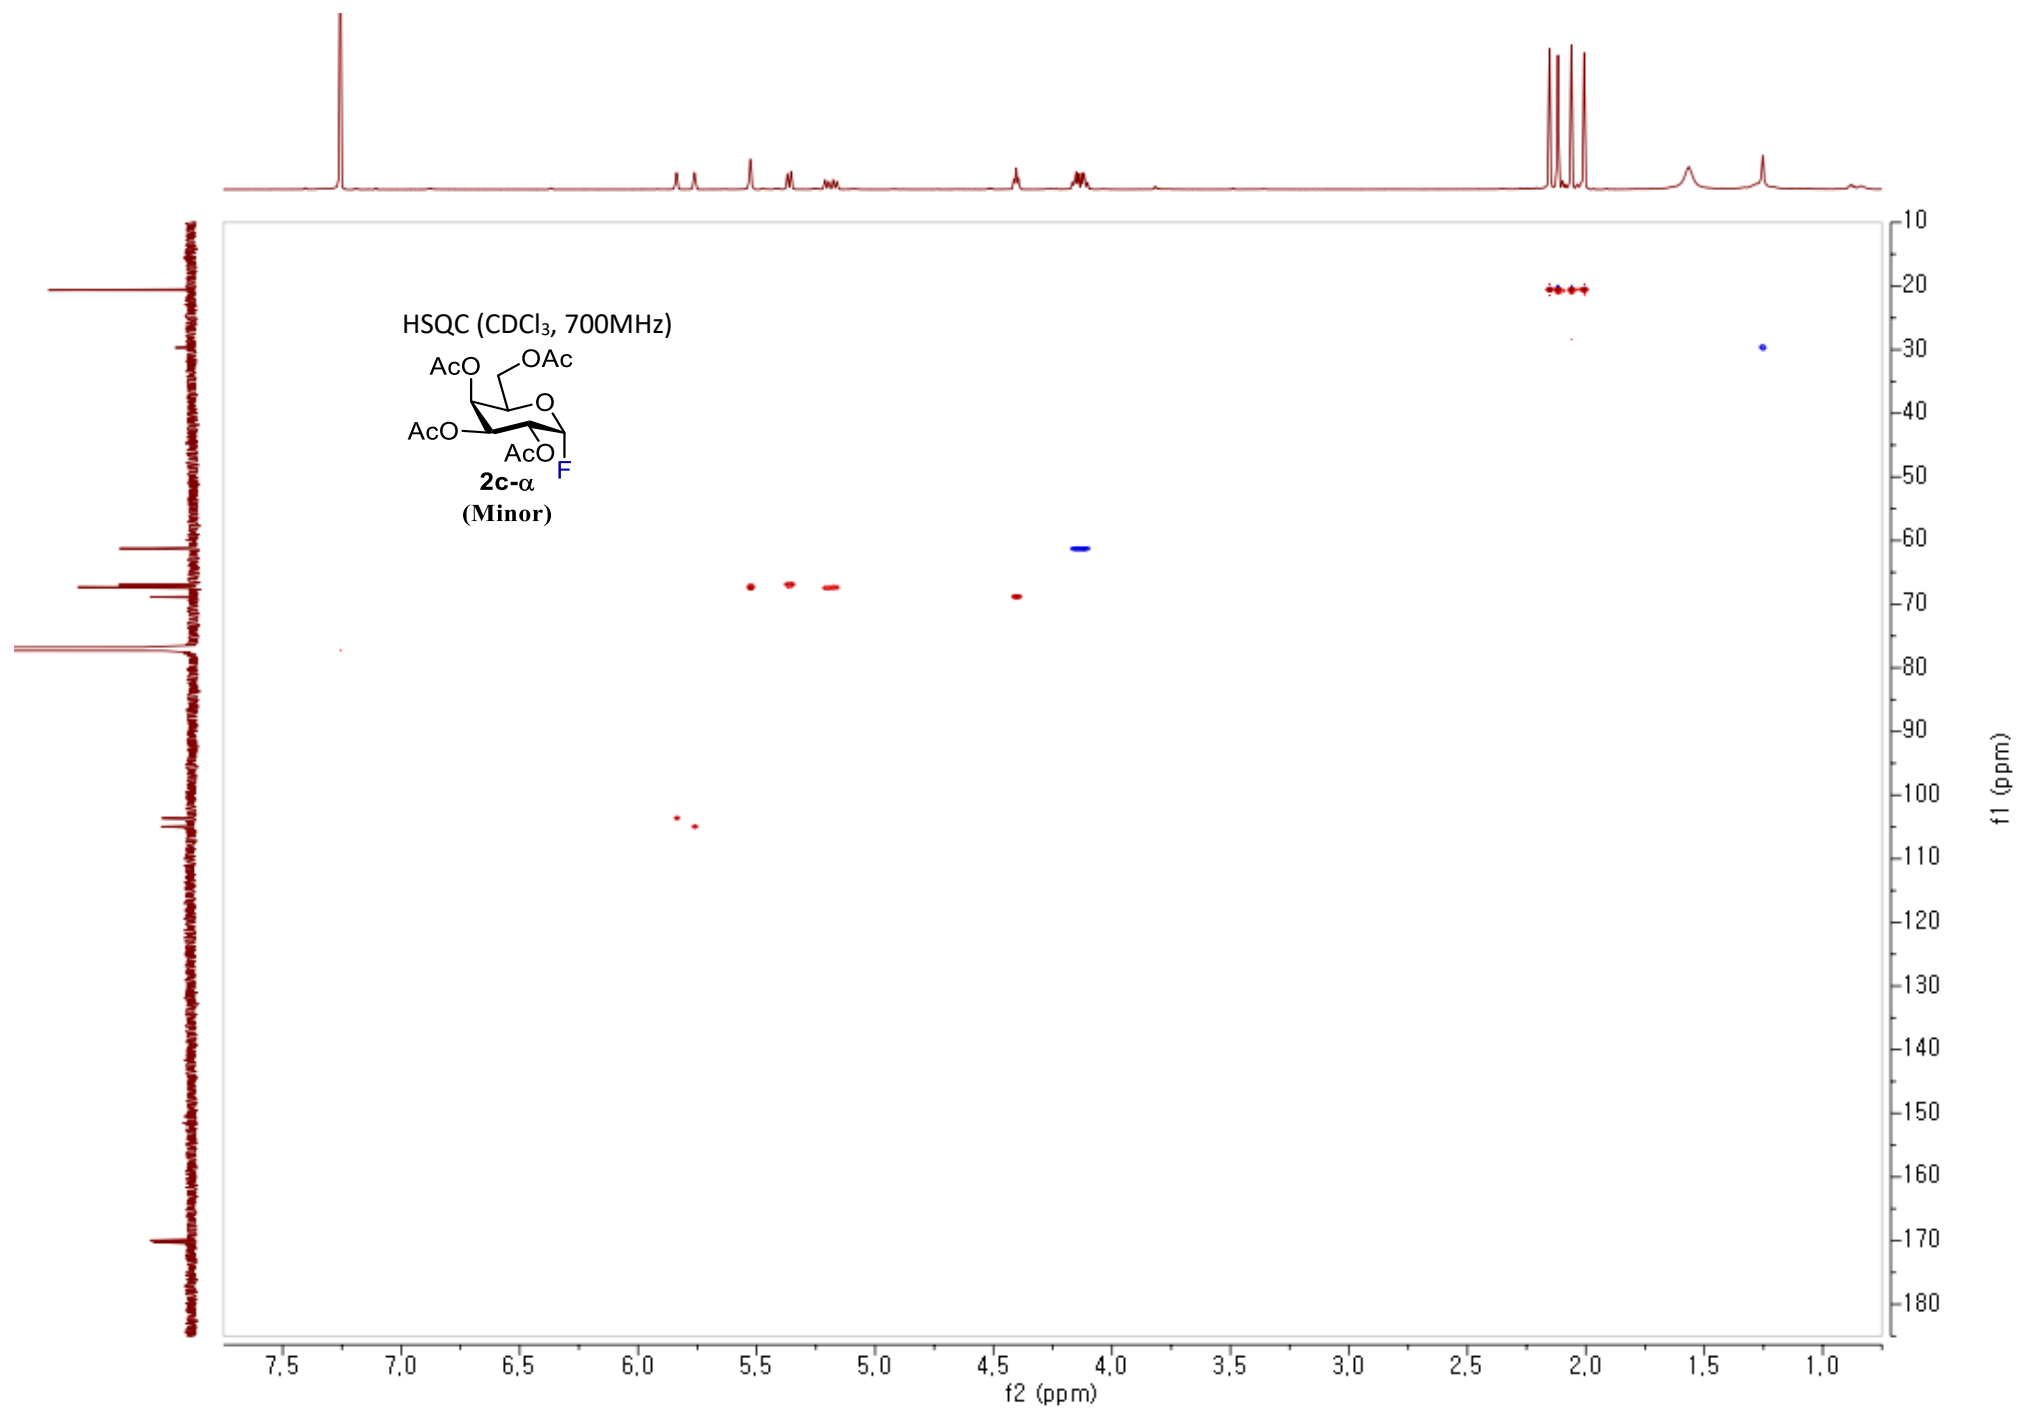

$^{19}\text{F}$  NMR ( $\text{CDCl}_3$ , 471MHz)

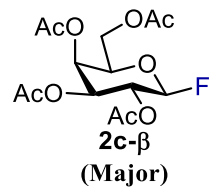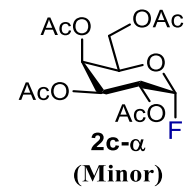

141.35  
141.38  
141.46  
141.48

150.69  
150.74  
150.80  
150.86

3.07

1.00

35 -136 -137 -138 -139 -140 -141 -142 -143 -144 -145 -146 -147 -148 -149 -150 -151 -152 -153 -154 -155 -1

f1 (ppm)

2,3,4-Tri-O-acetyl- $\alpha$ -L-rhamnopyranosyl fluoride (**2d- $\alpha$** , Major diastereomer)

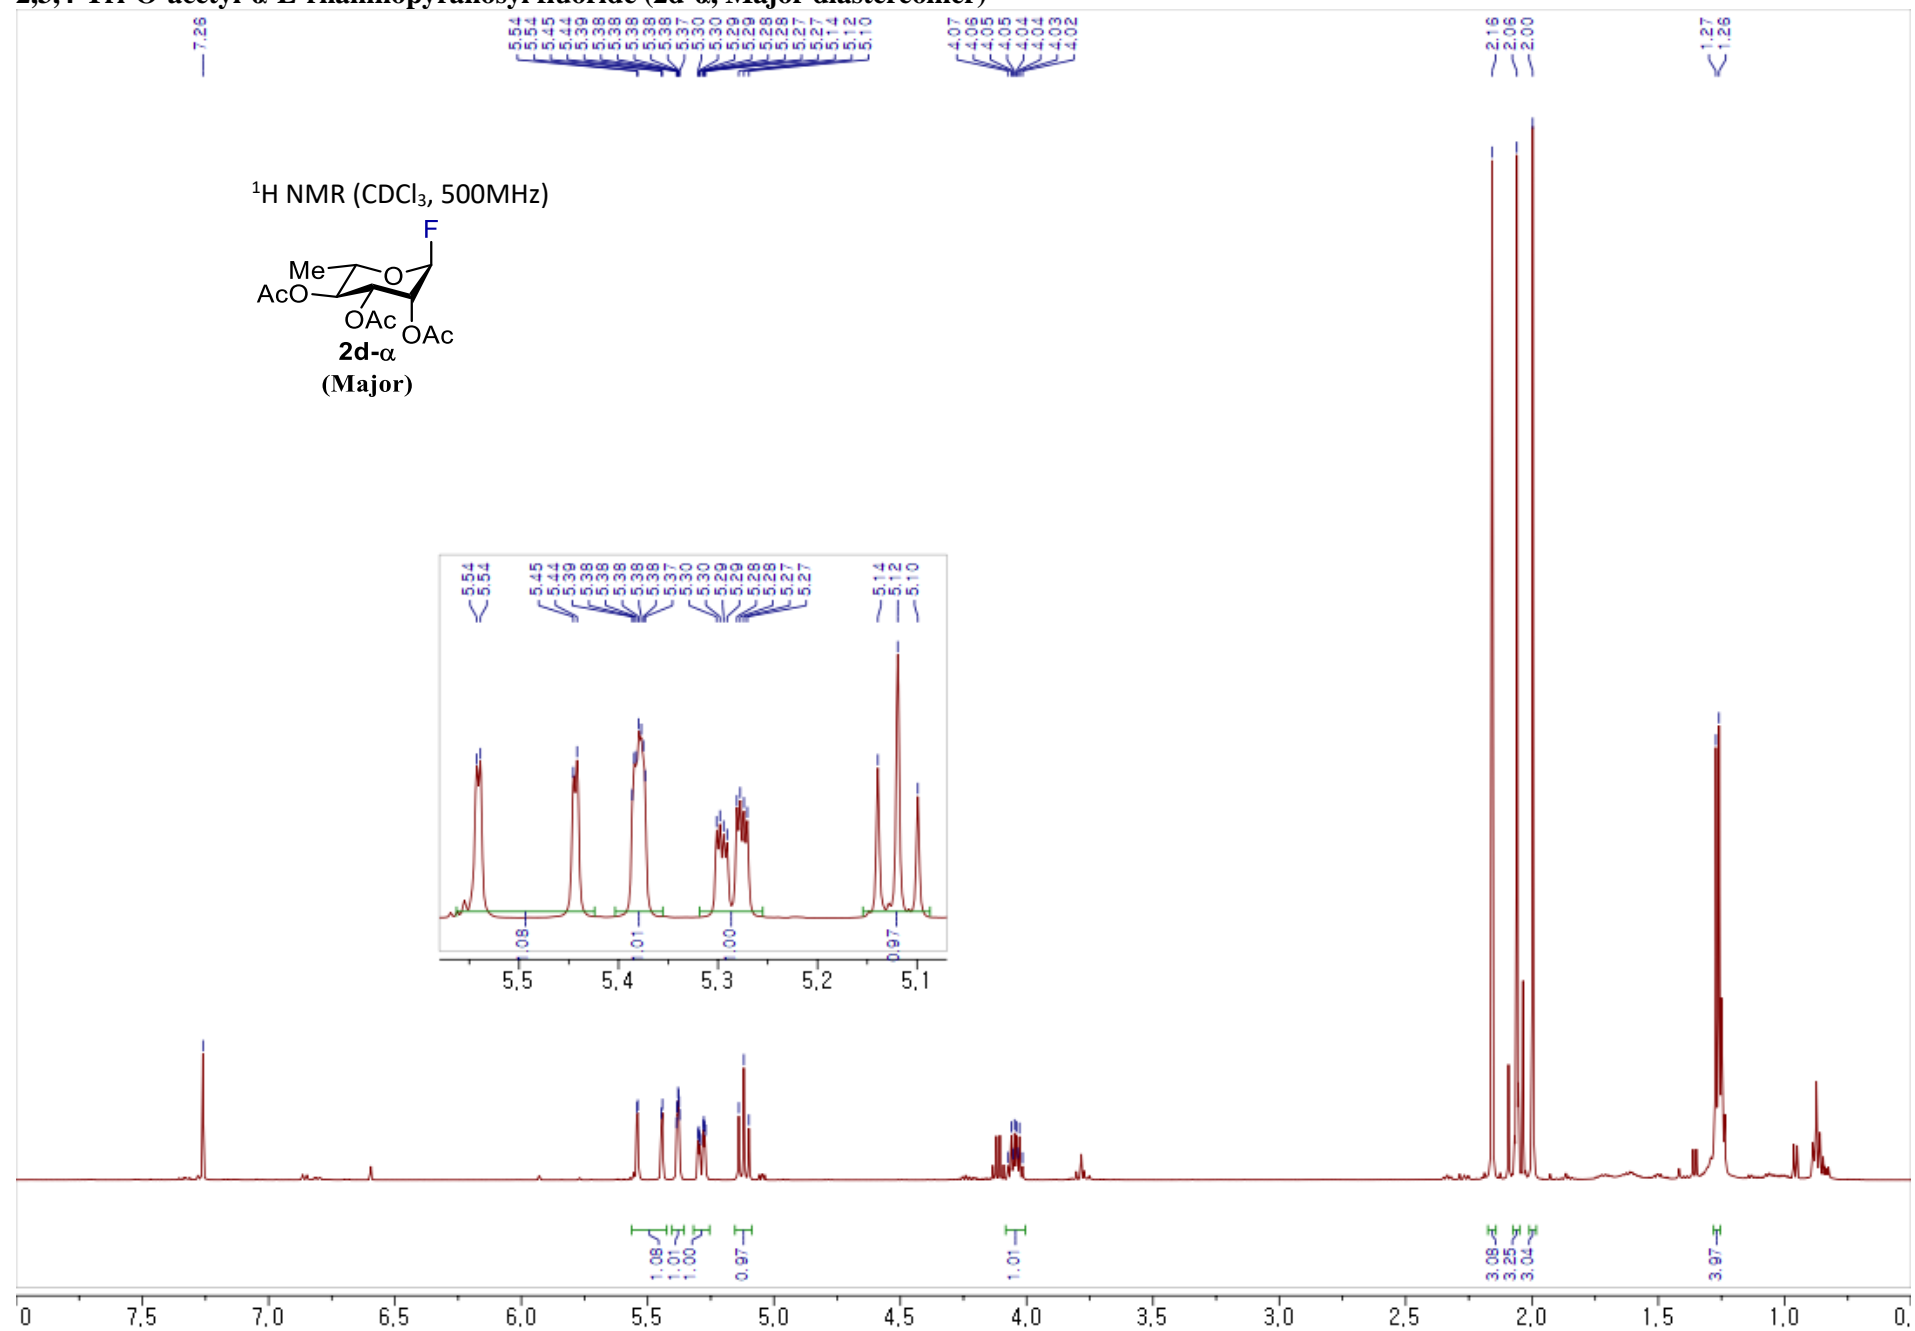

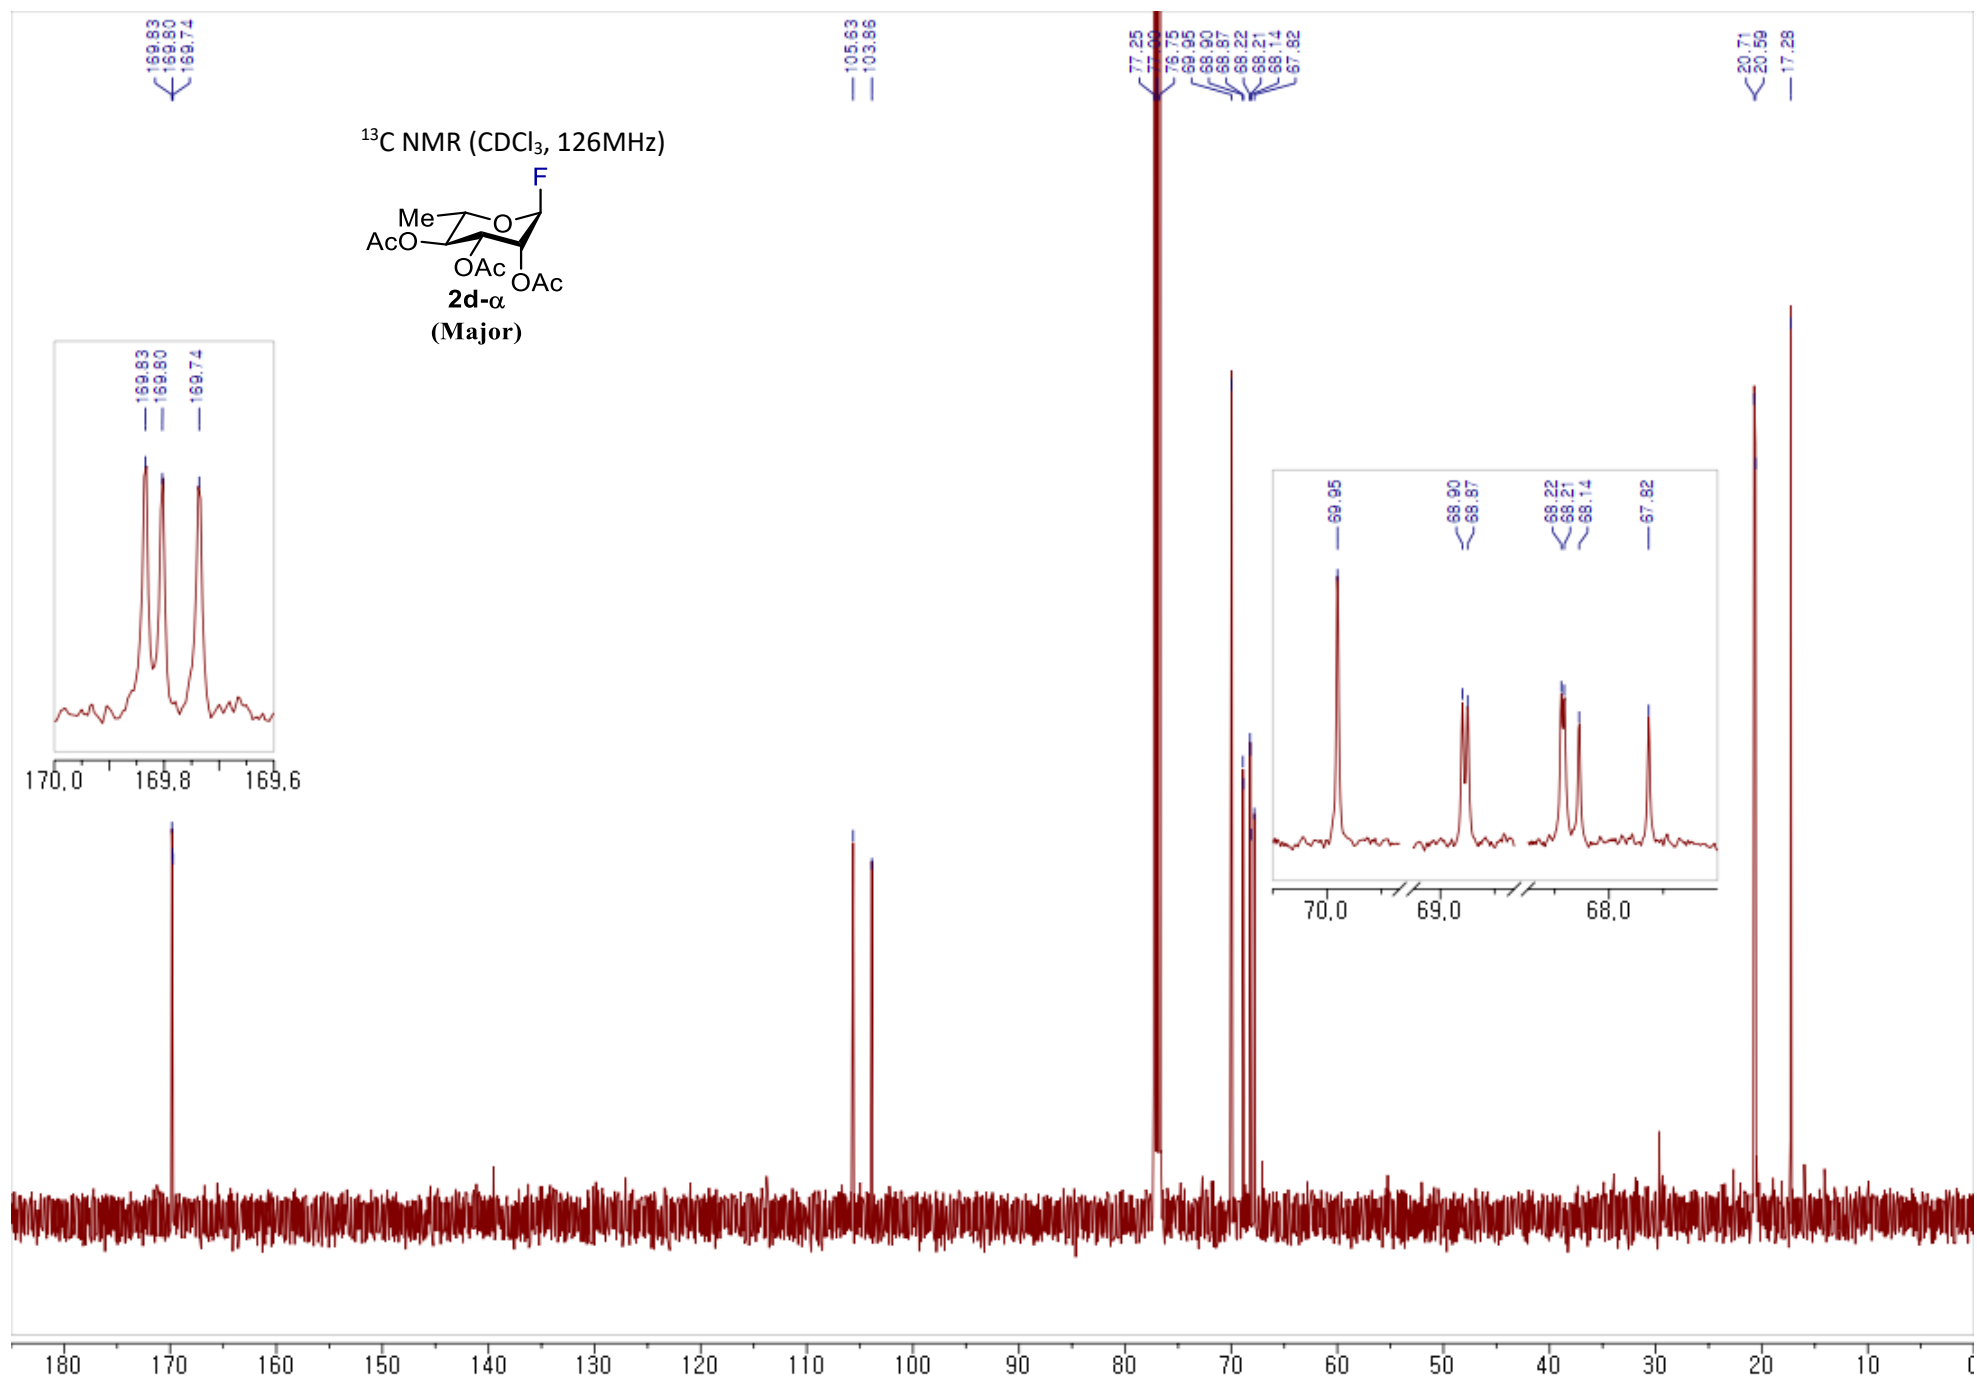

$^{19}\text{F}$  NMR ( $\text{CDCl}_3$ , 471MHz)

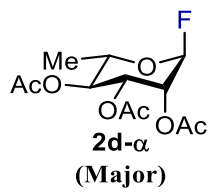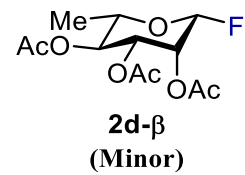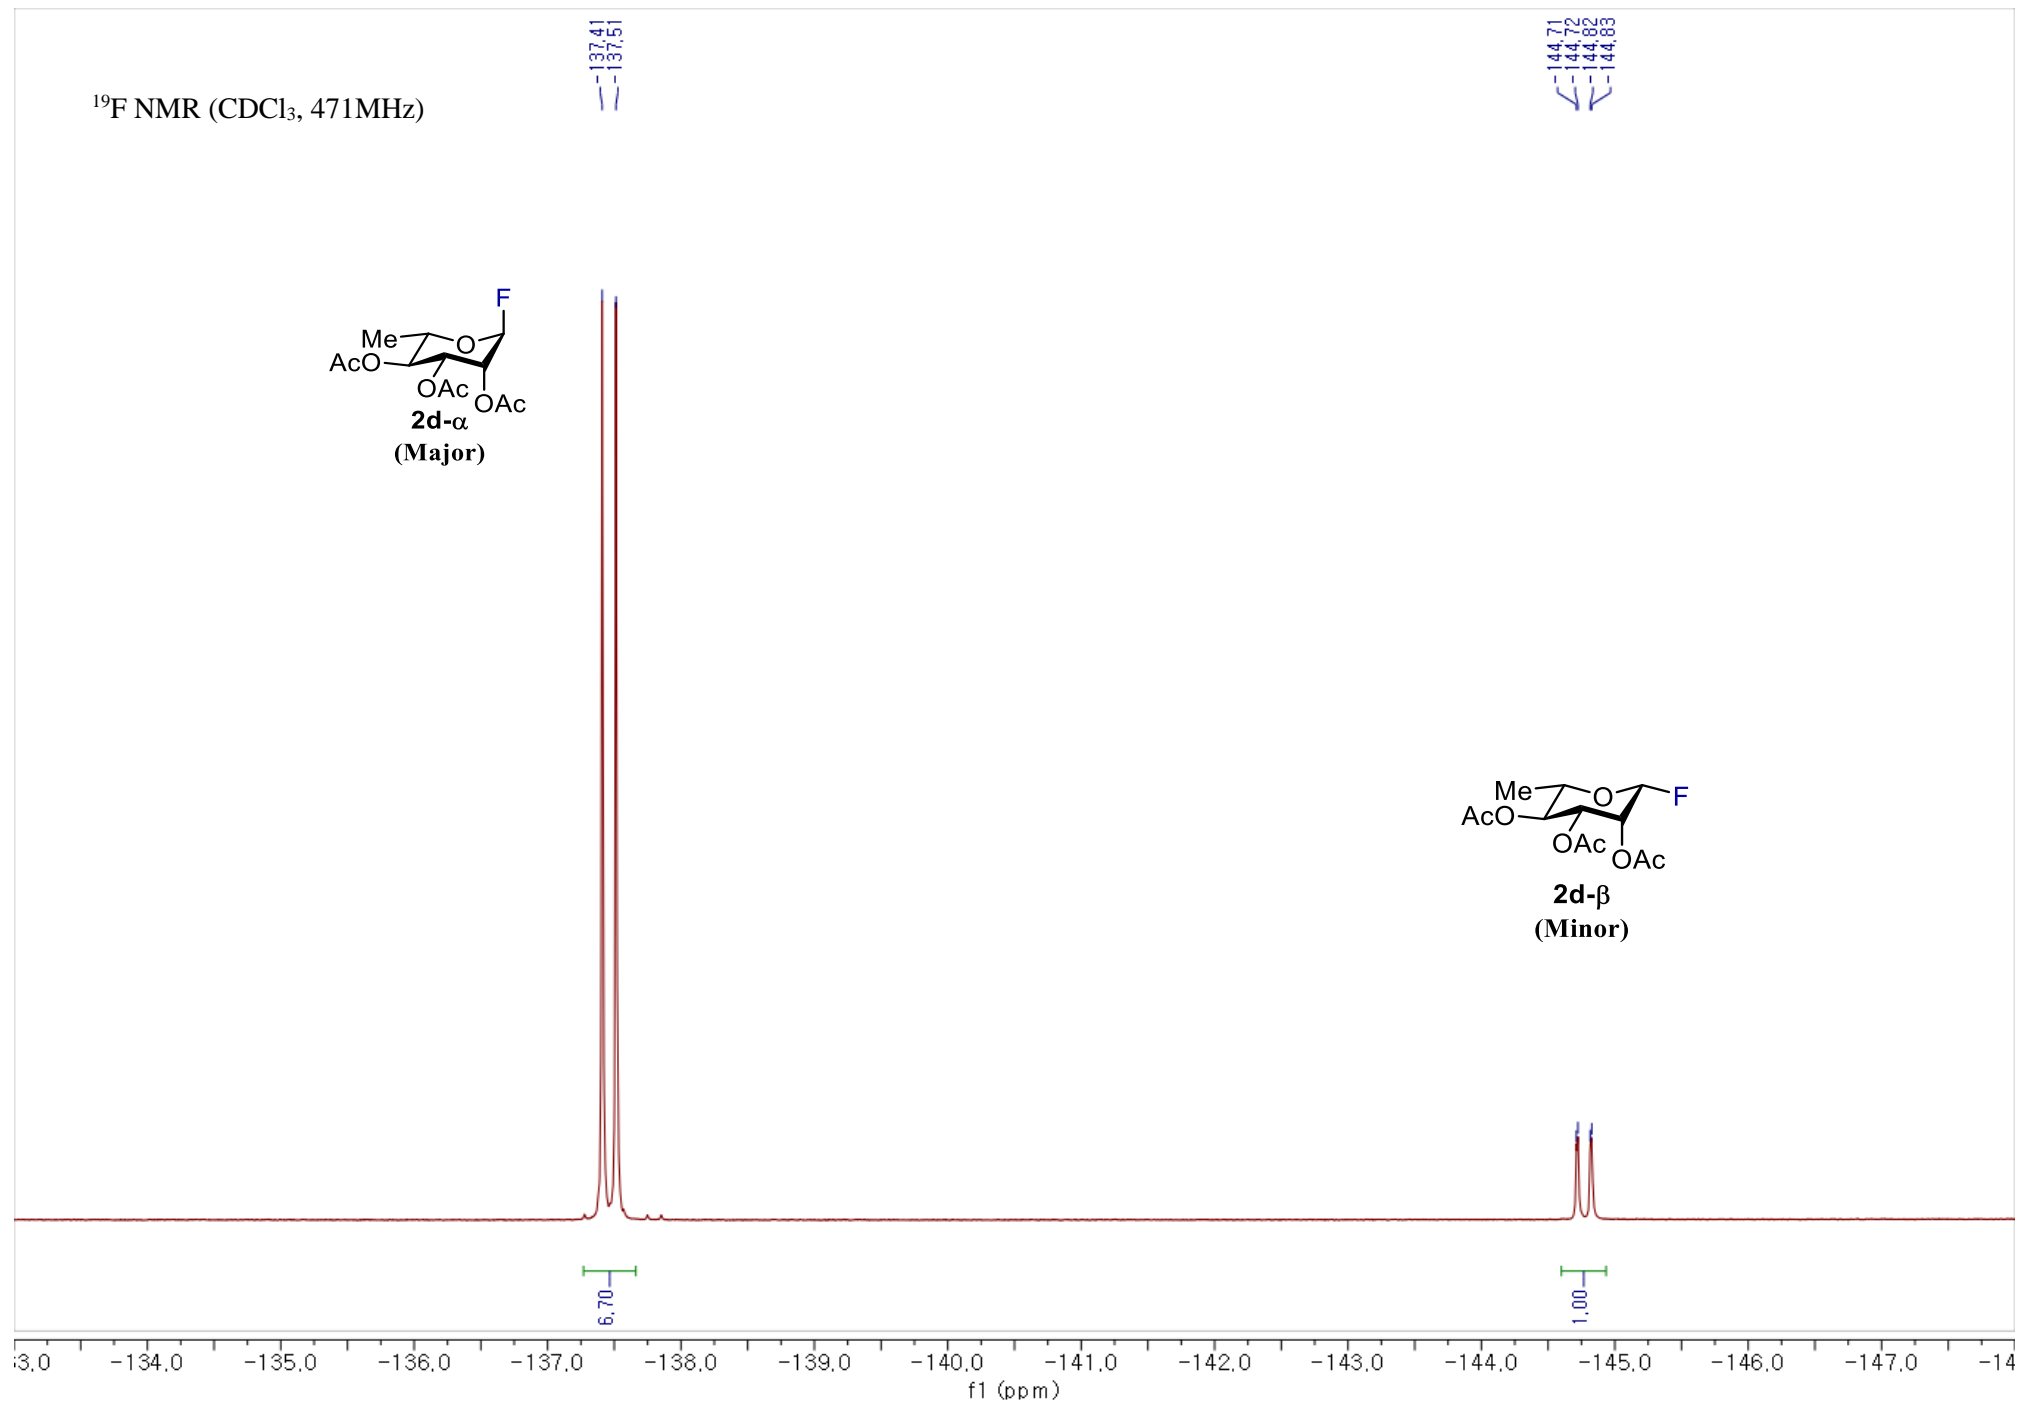

2,3,4,6-Tetrakis-*O*-(phenylmethyl)- $\beta$ -D-galactopyranosyl fluoride (2e- $\beta$ , Major diastereomer)

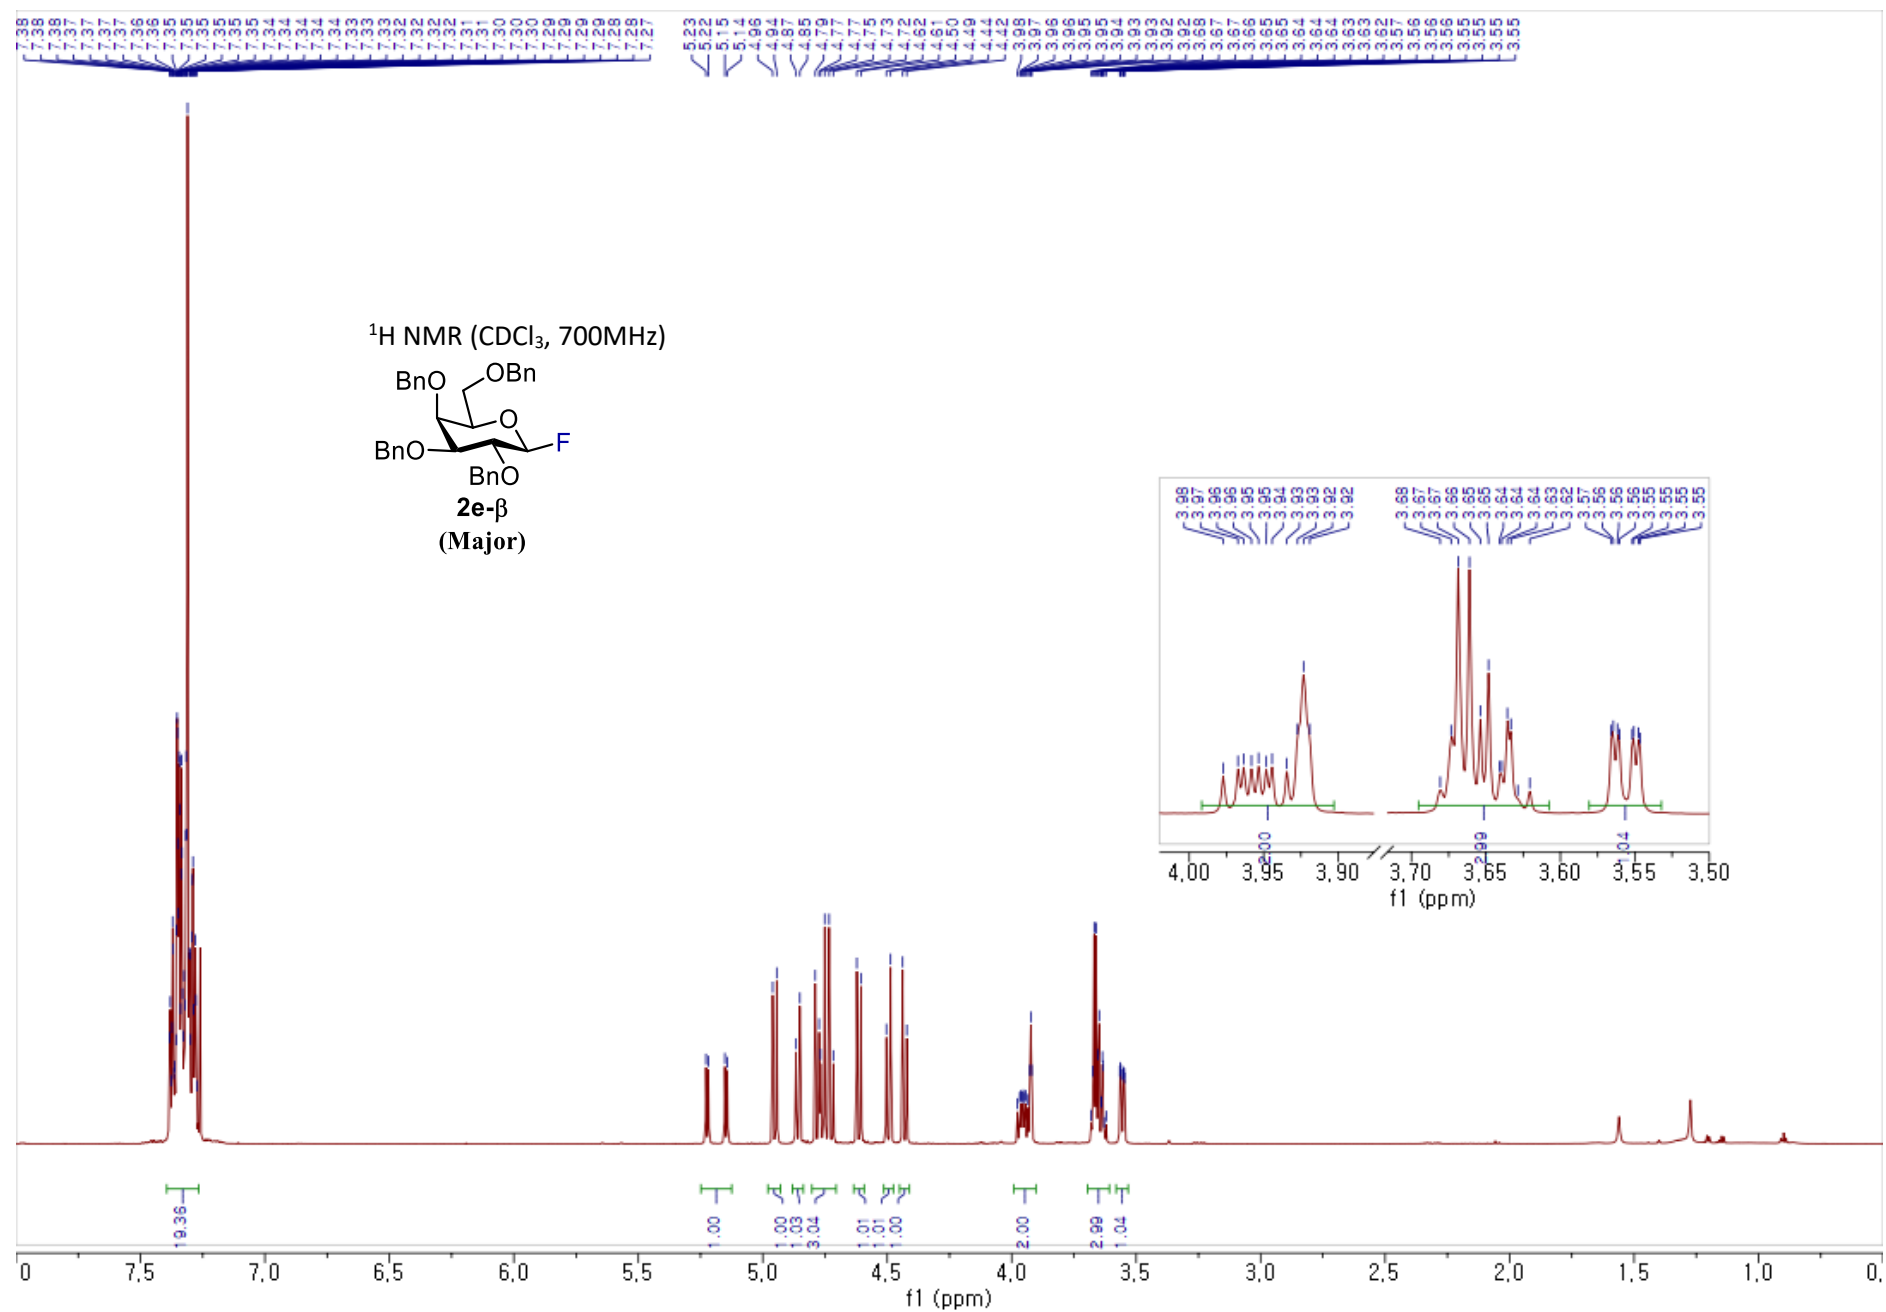

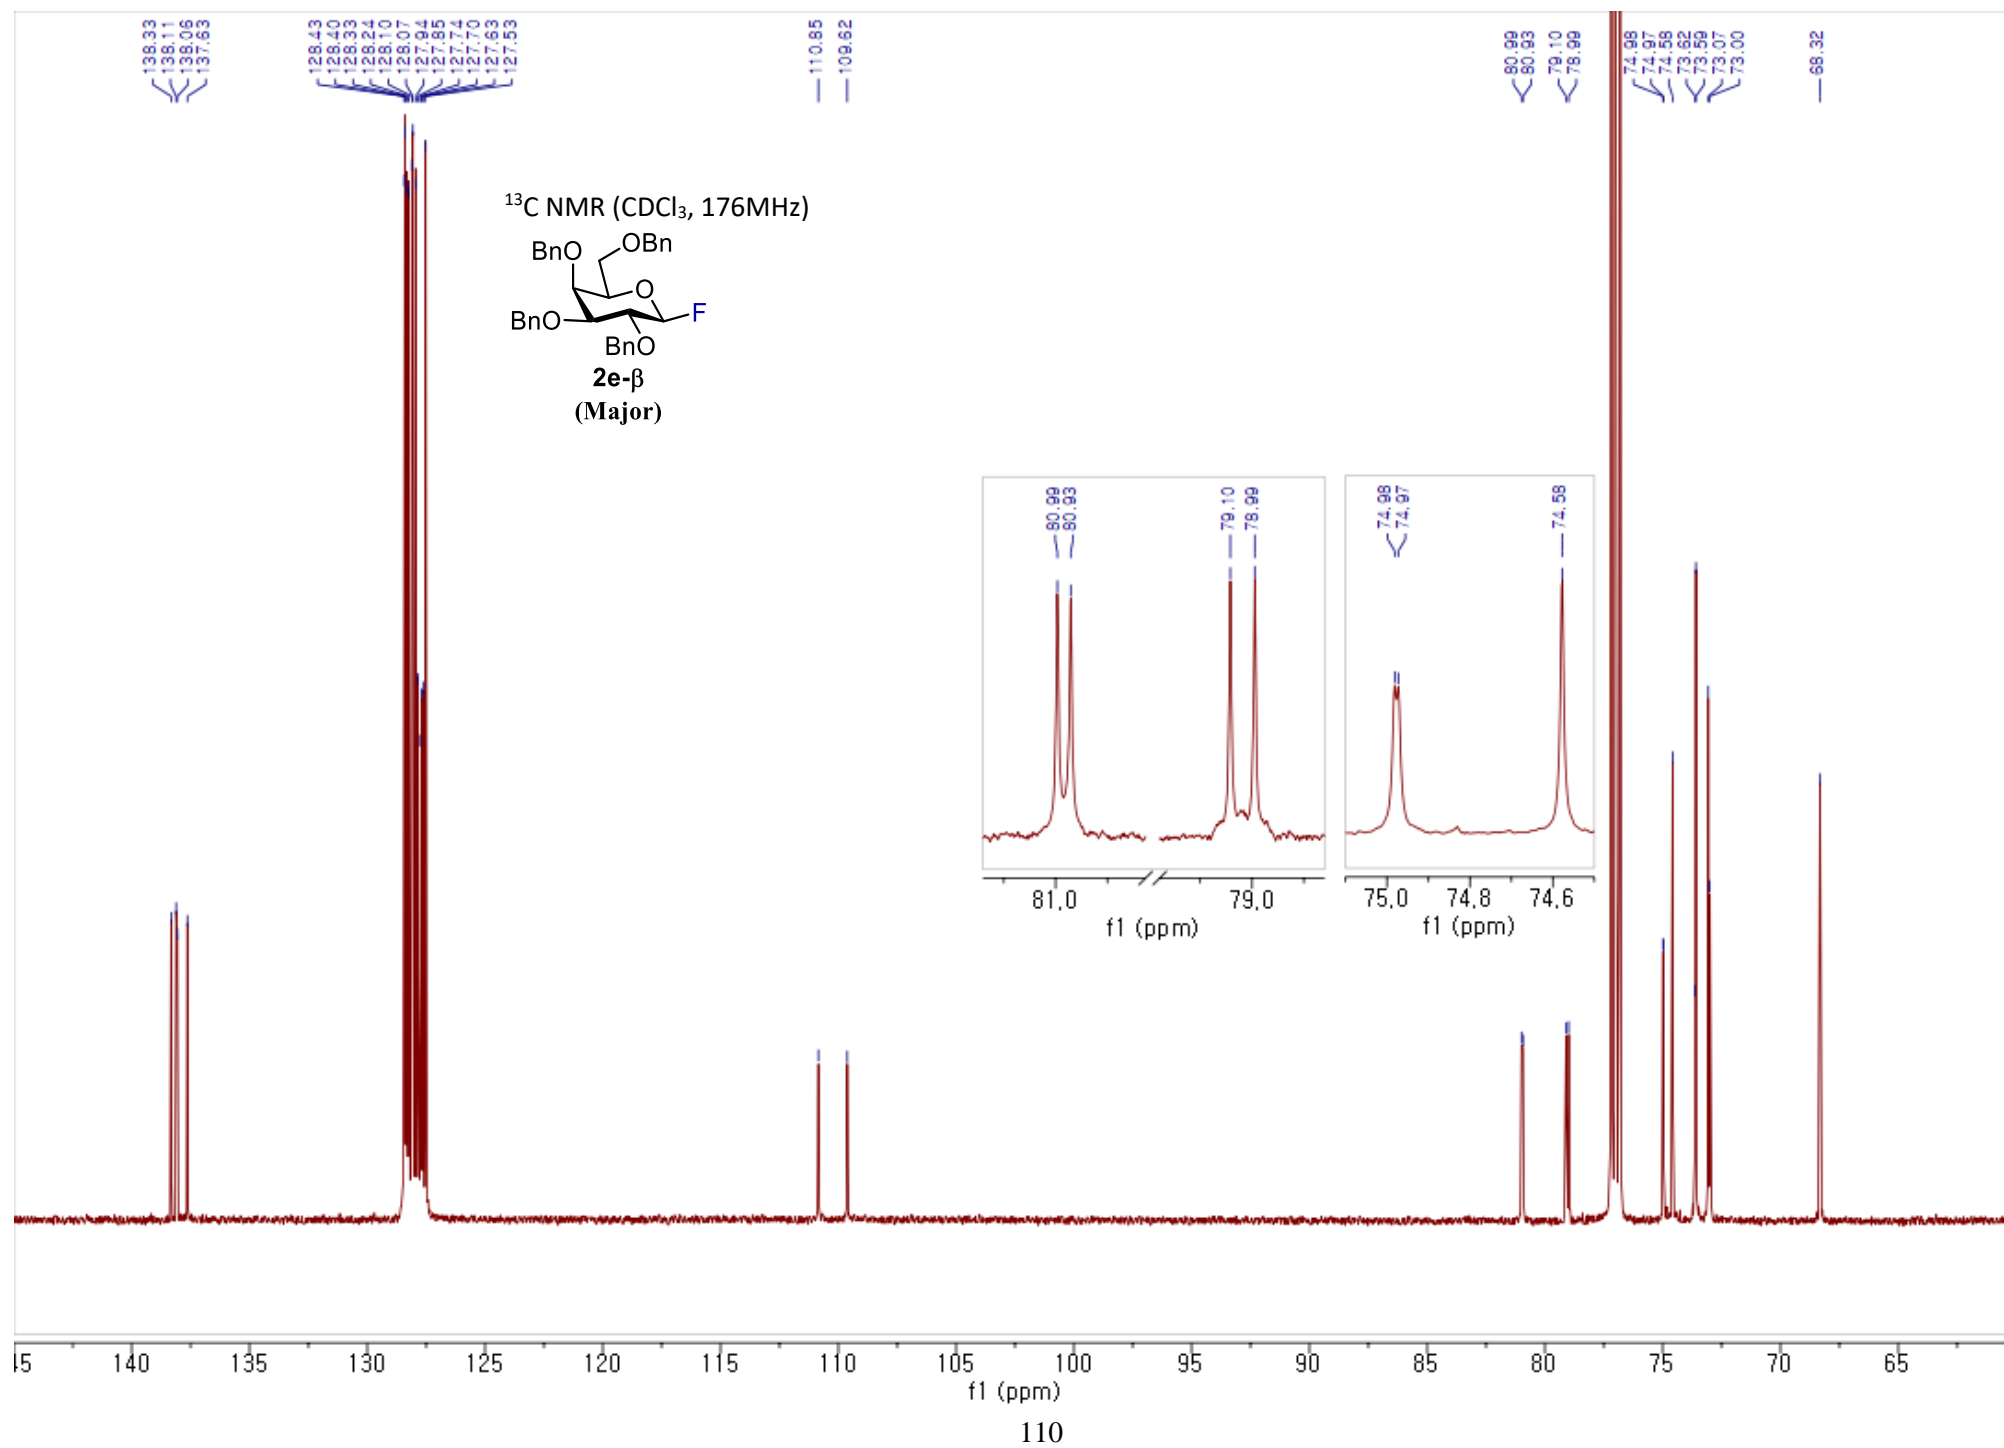

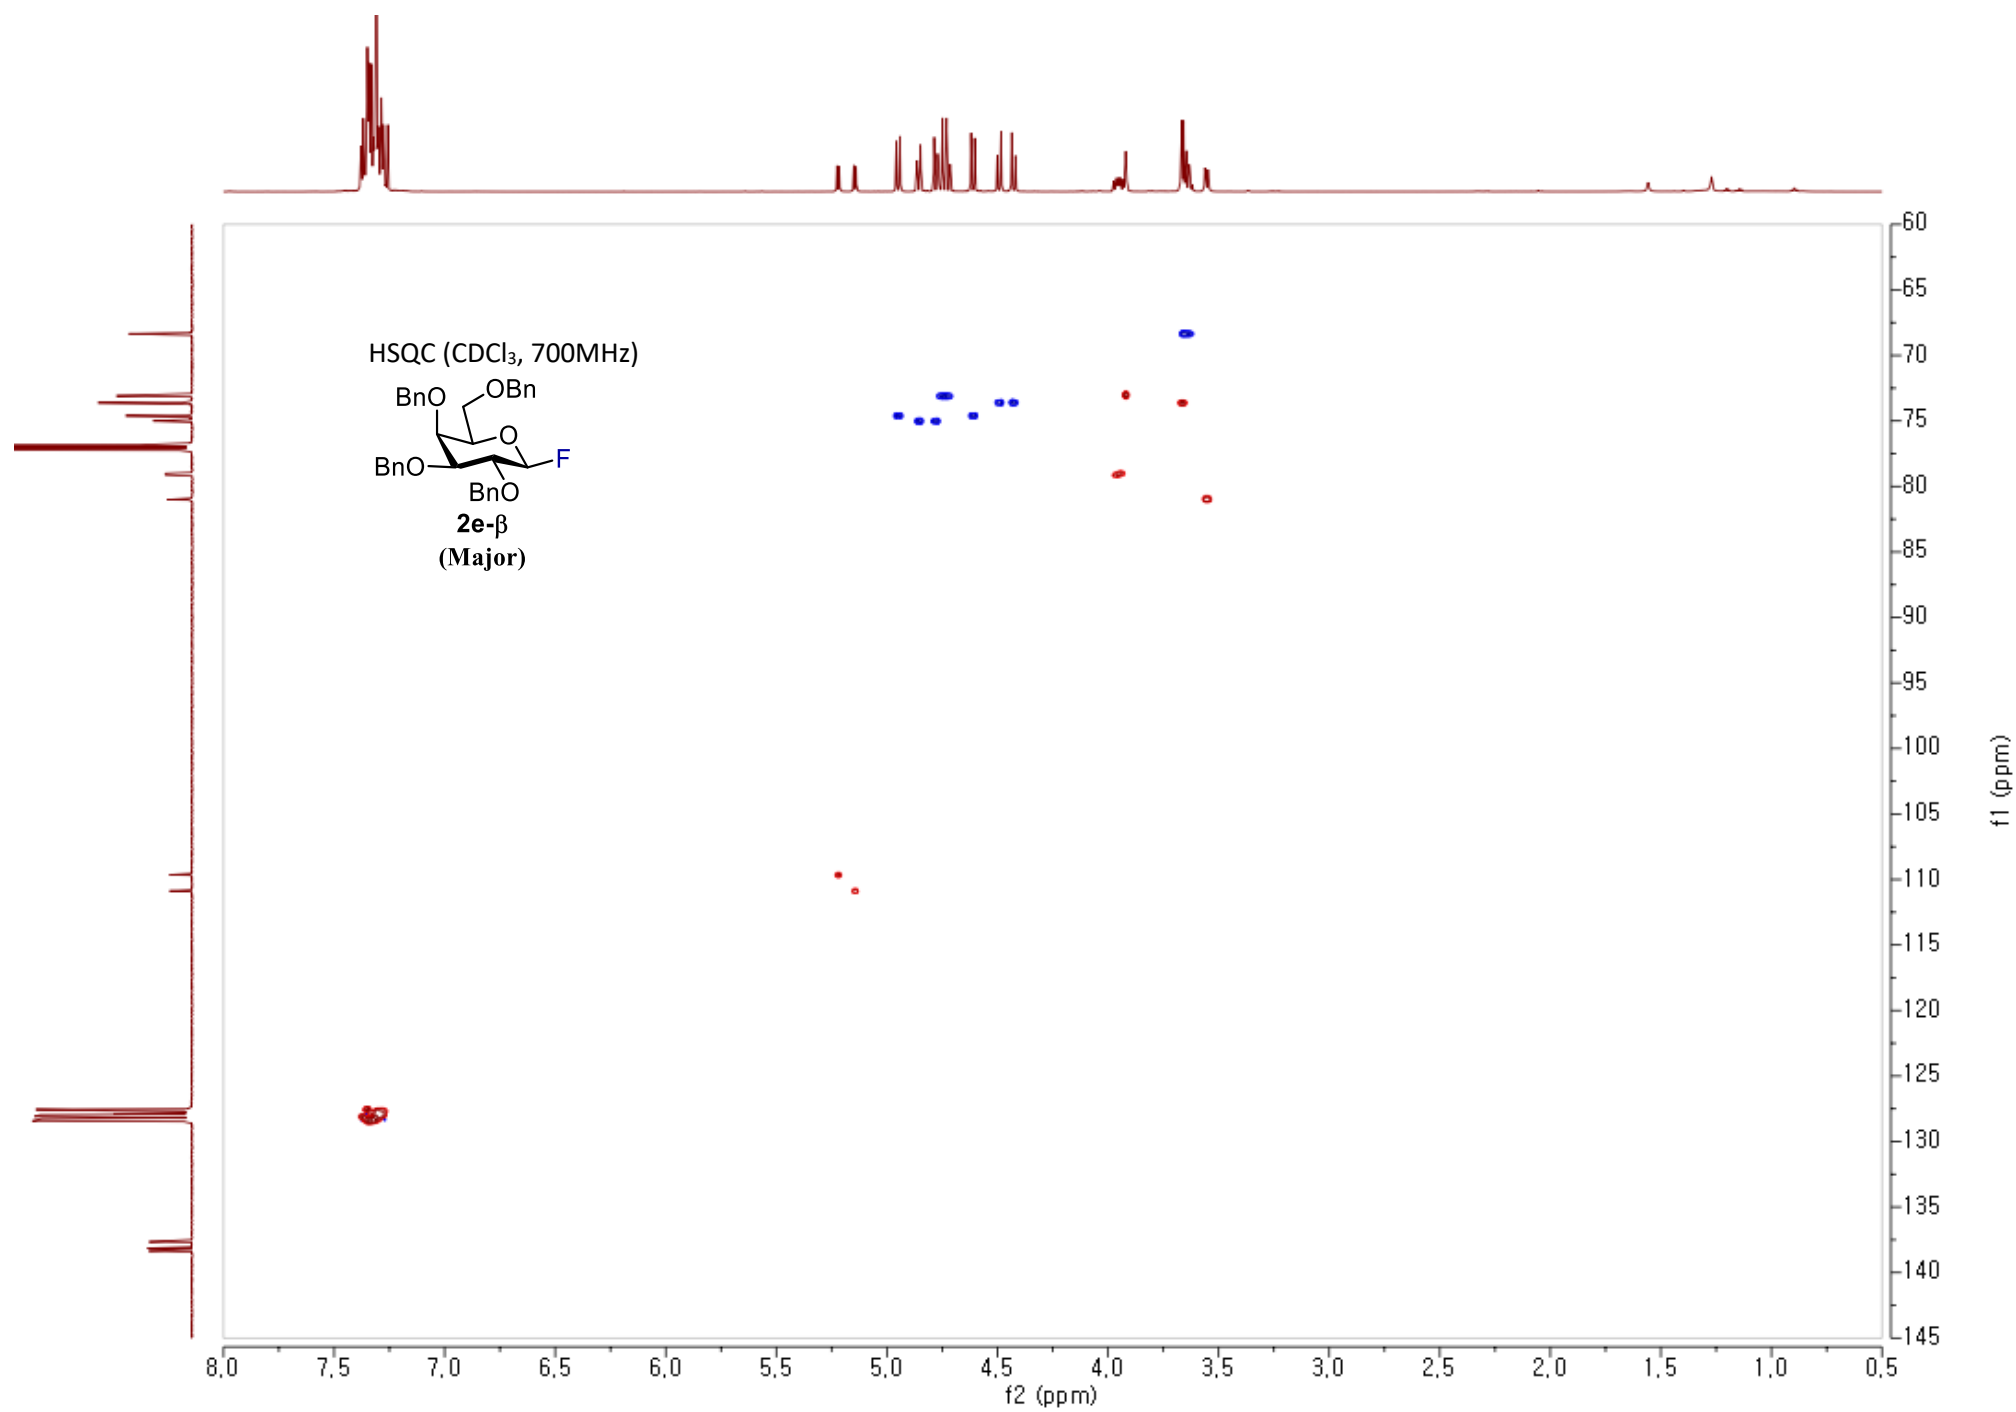

2,3,4,6-Tetrakis-*O*-(phenylmethyl)- $\alpha$ -D-galactopyranosyl fluoride (2e- $\alpha$ , Minor diastereomer)

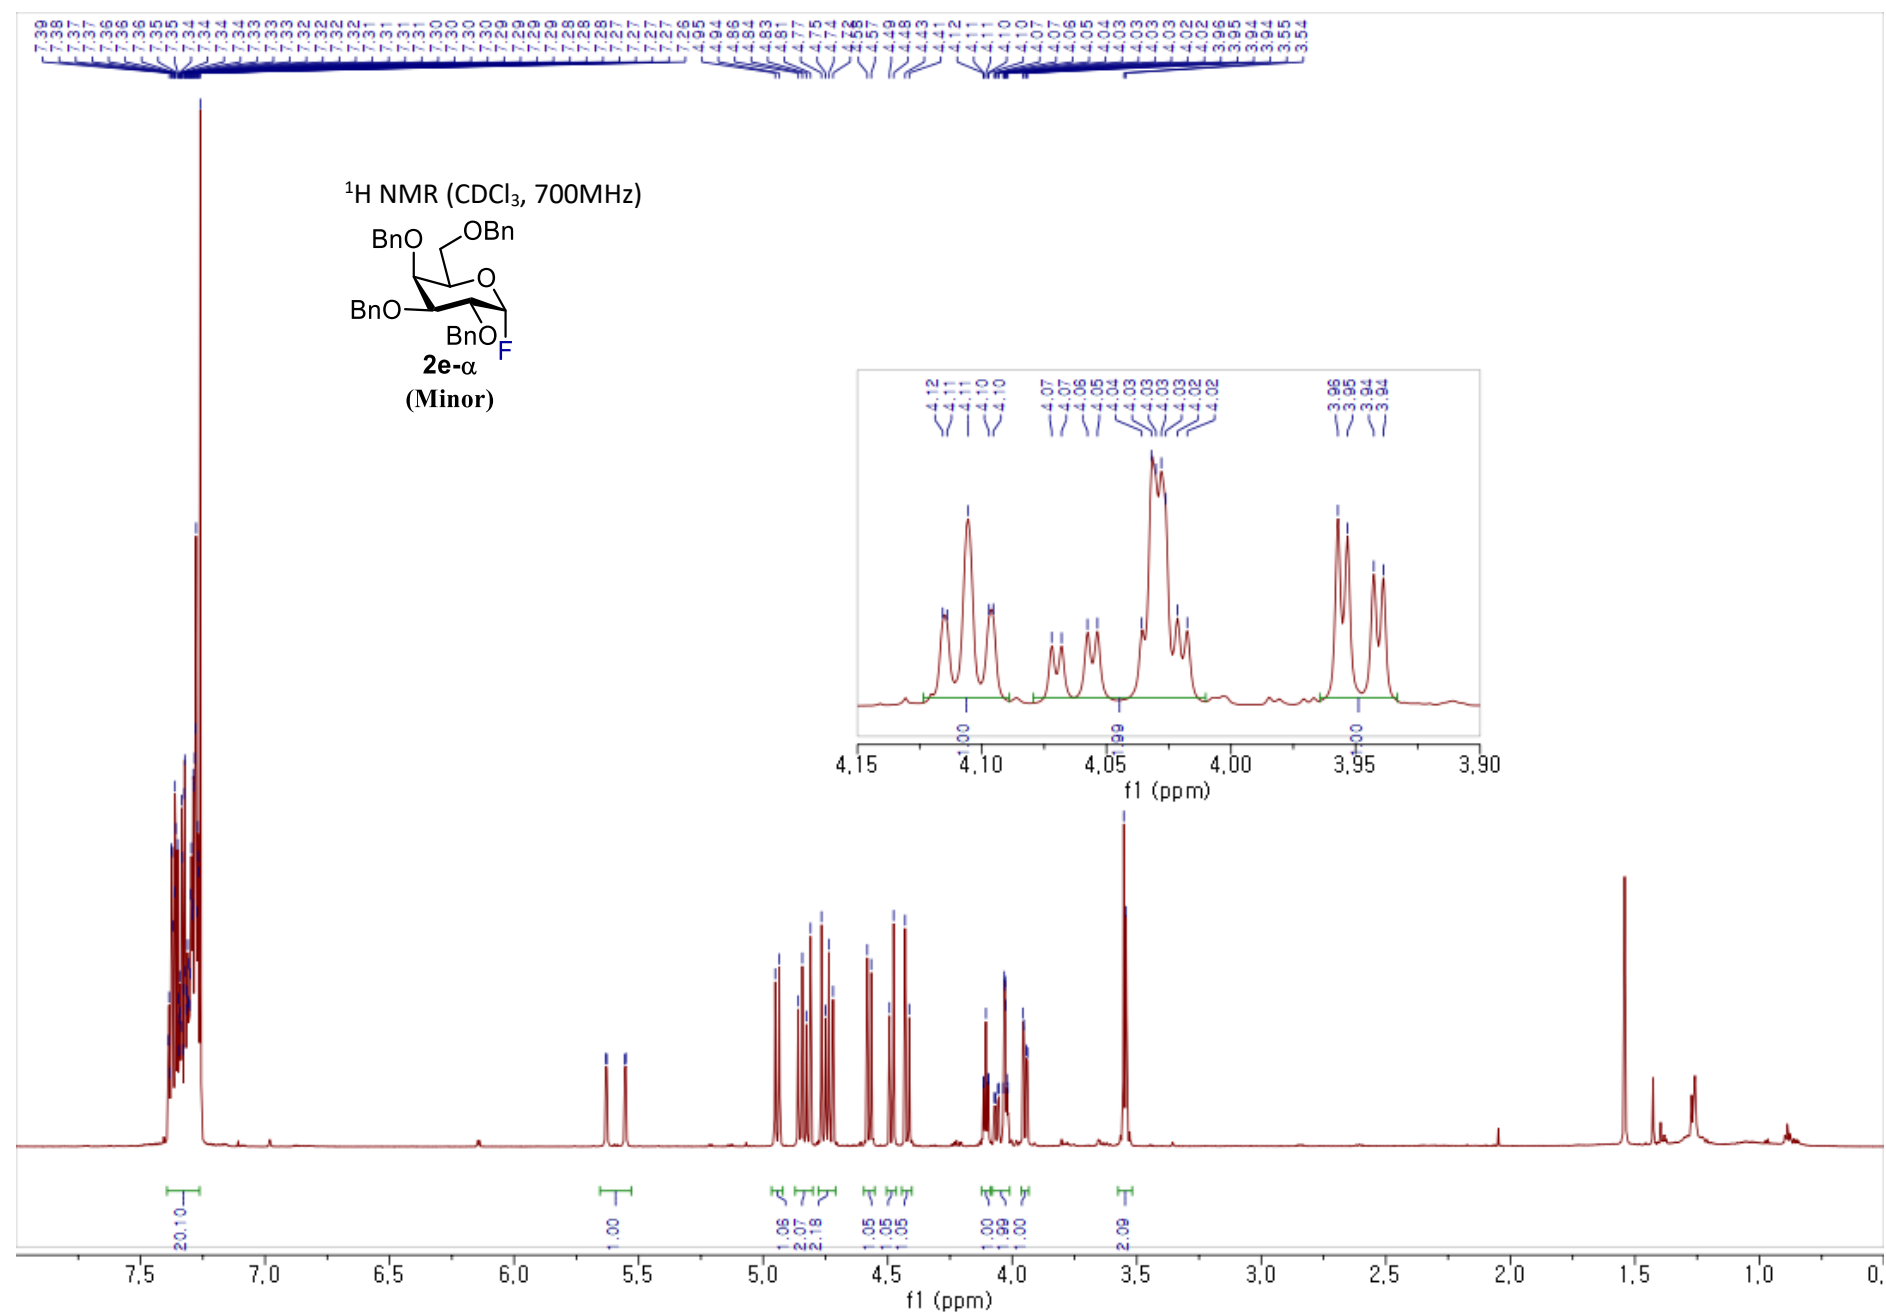

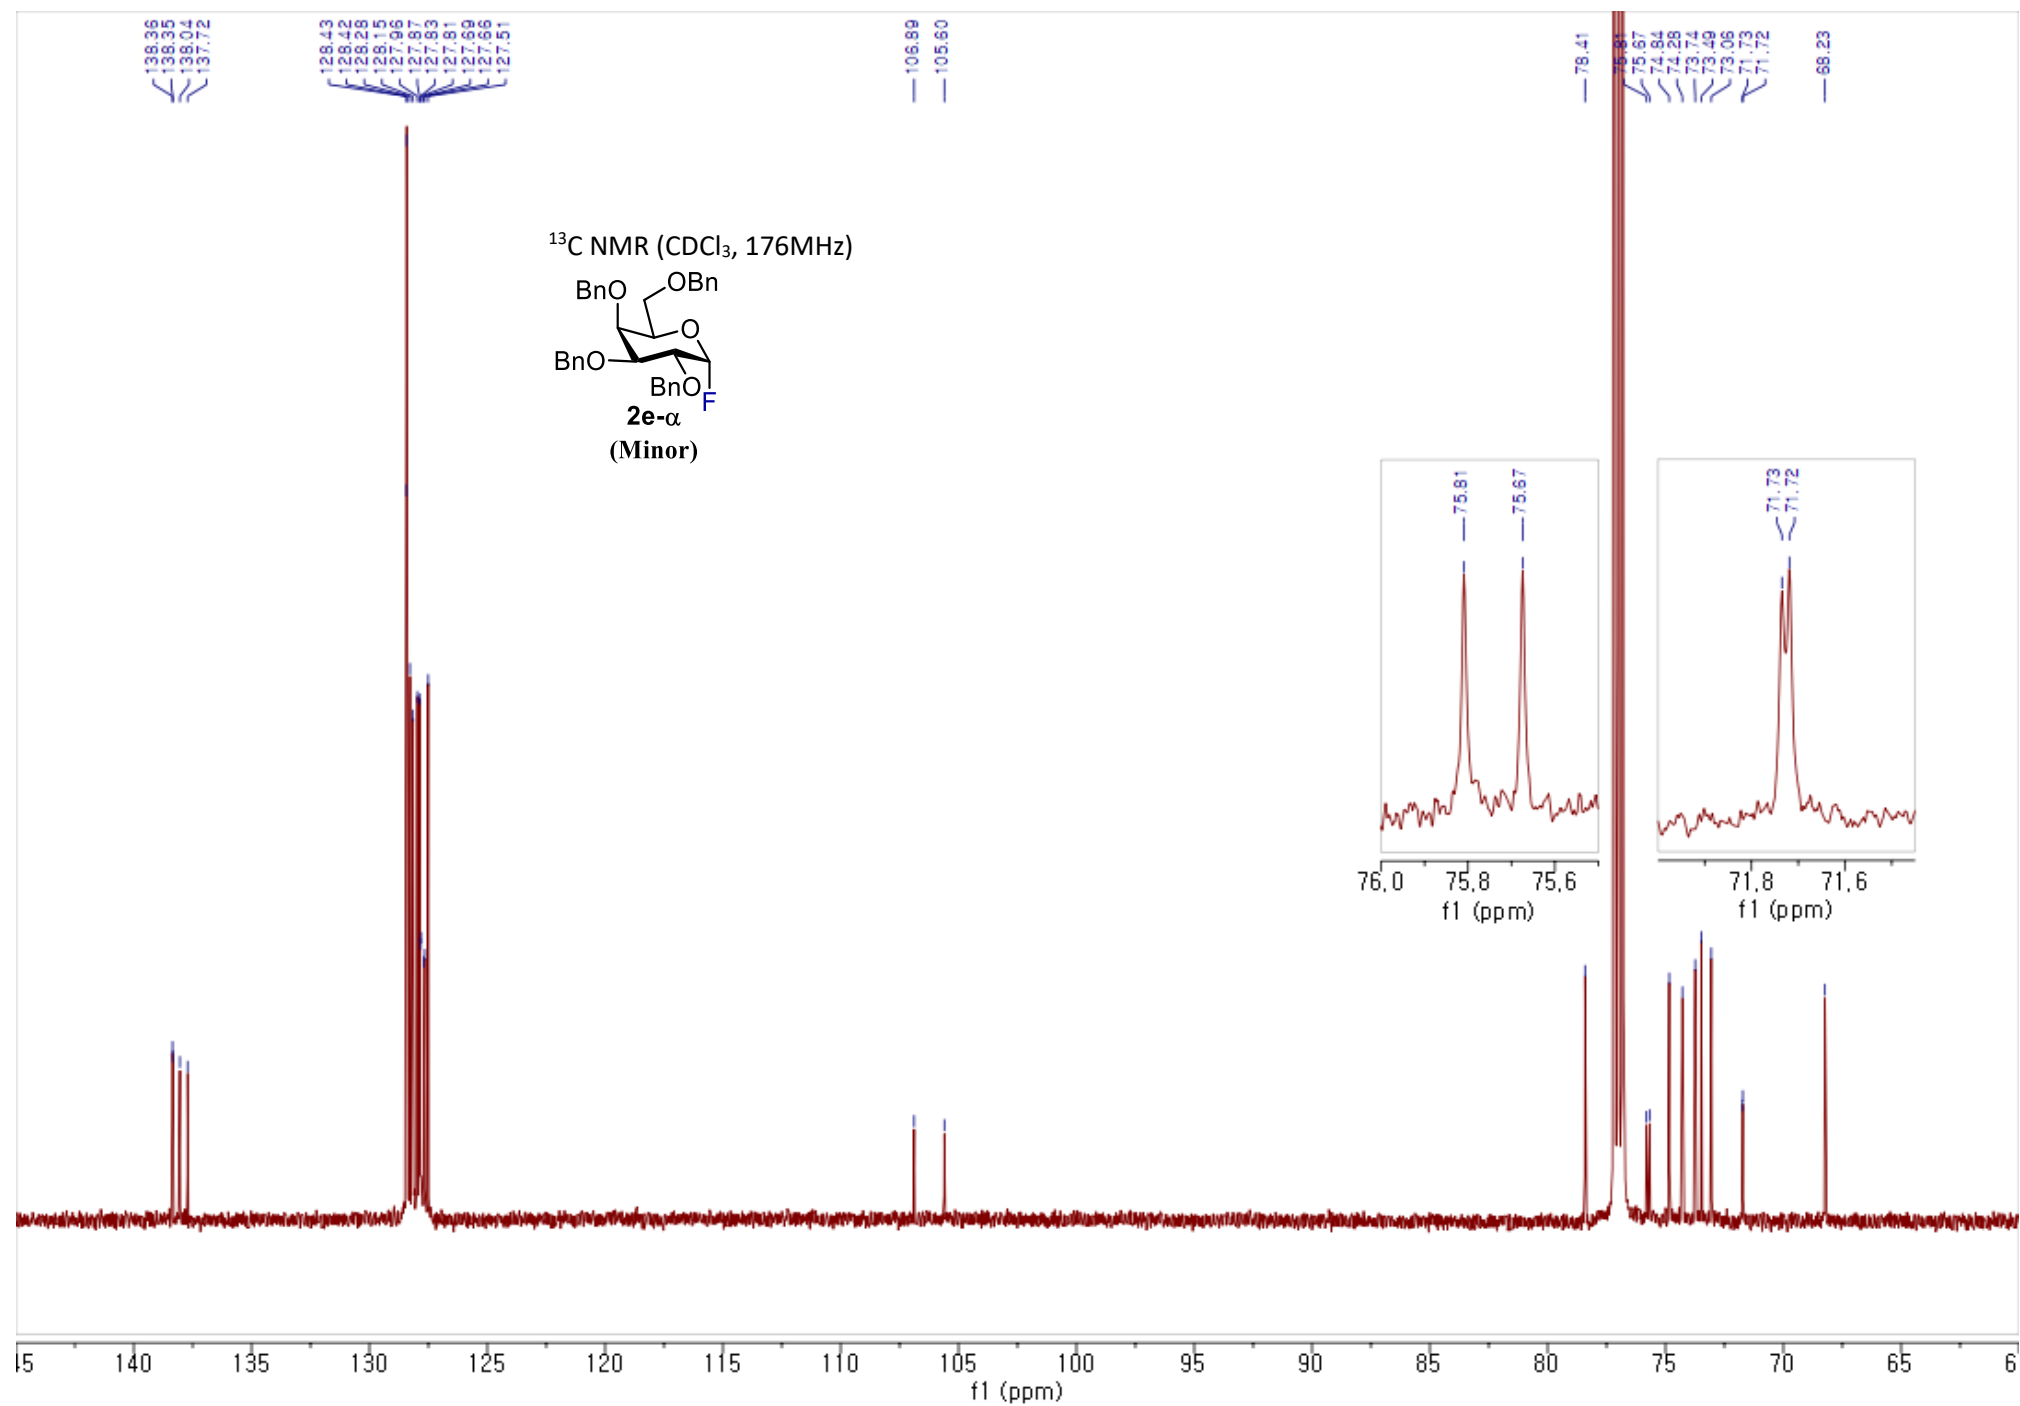

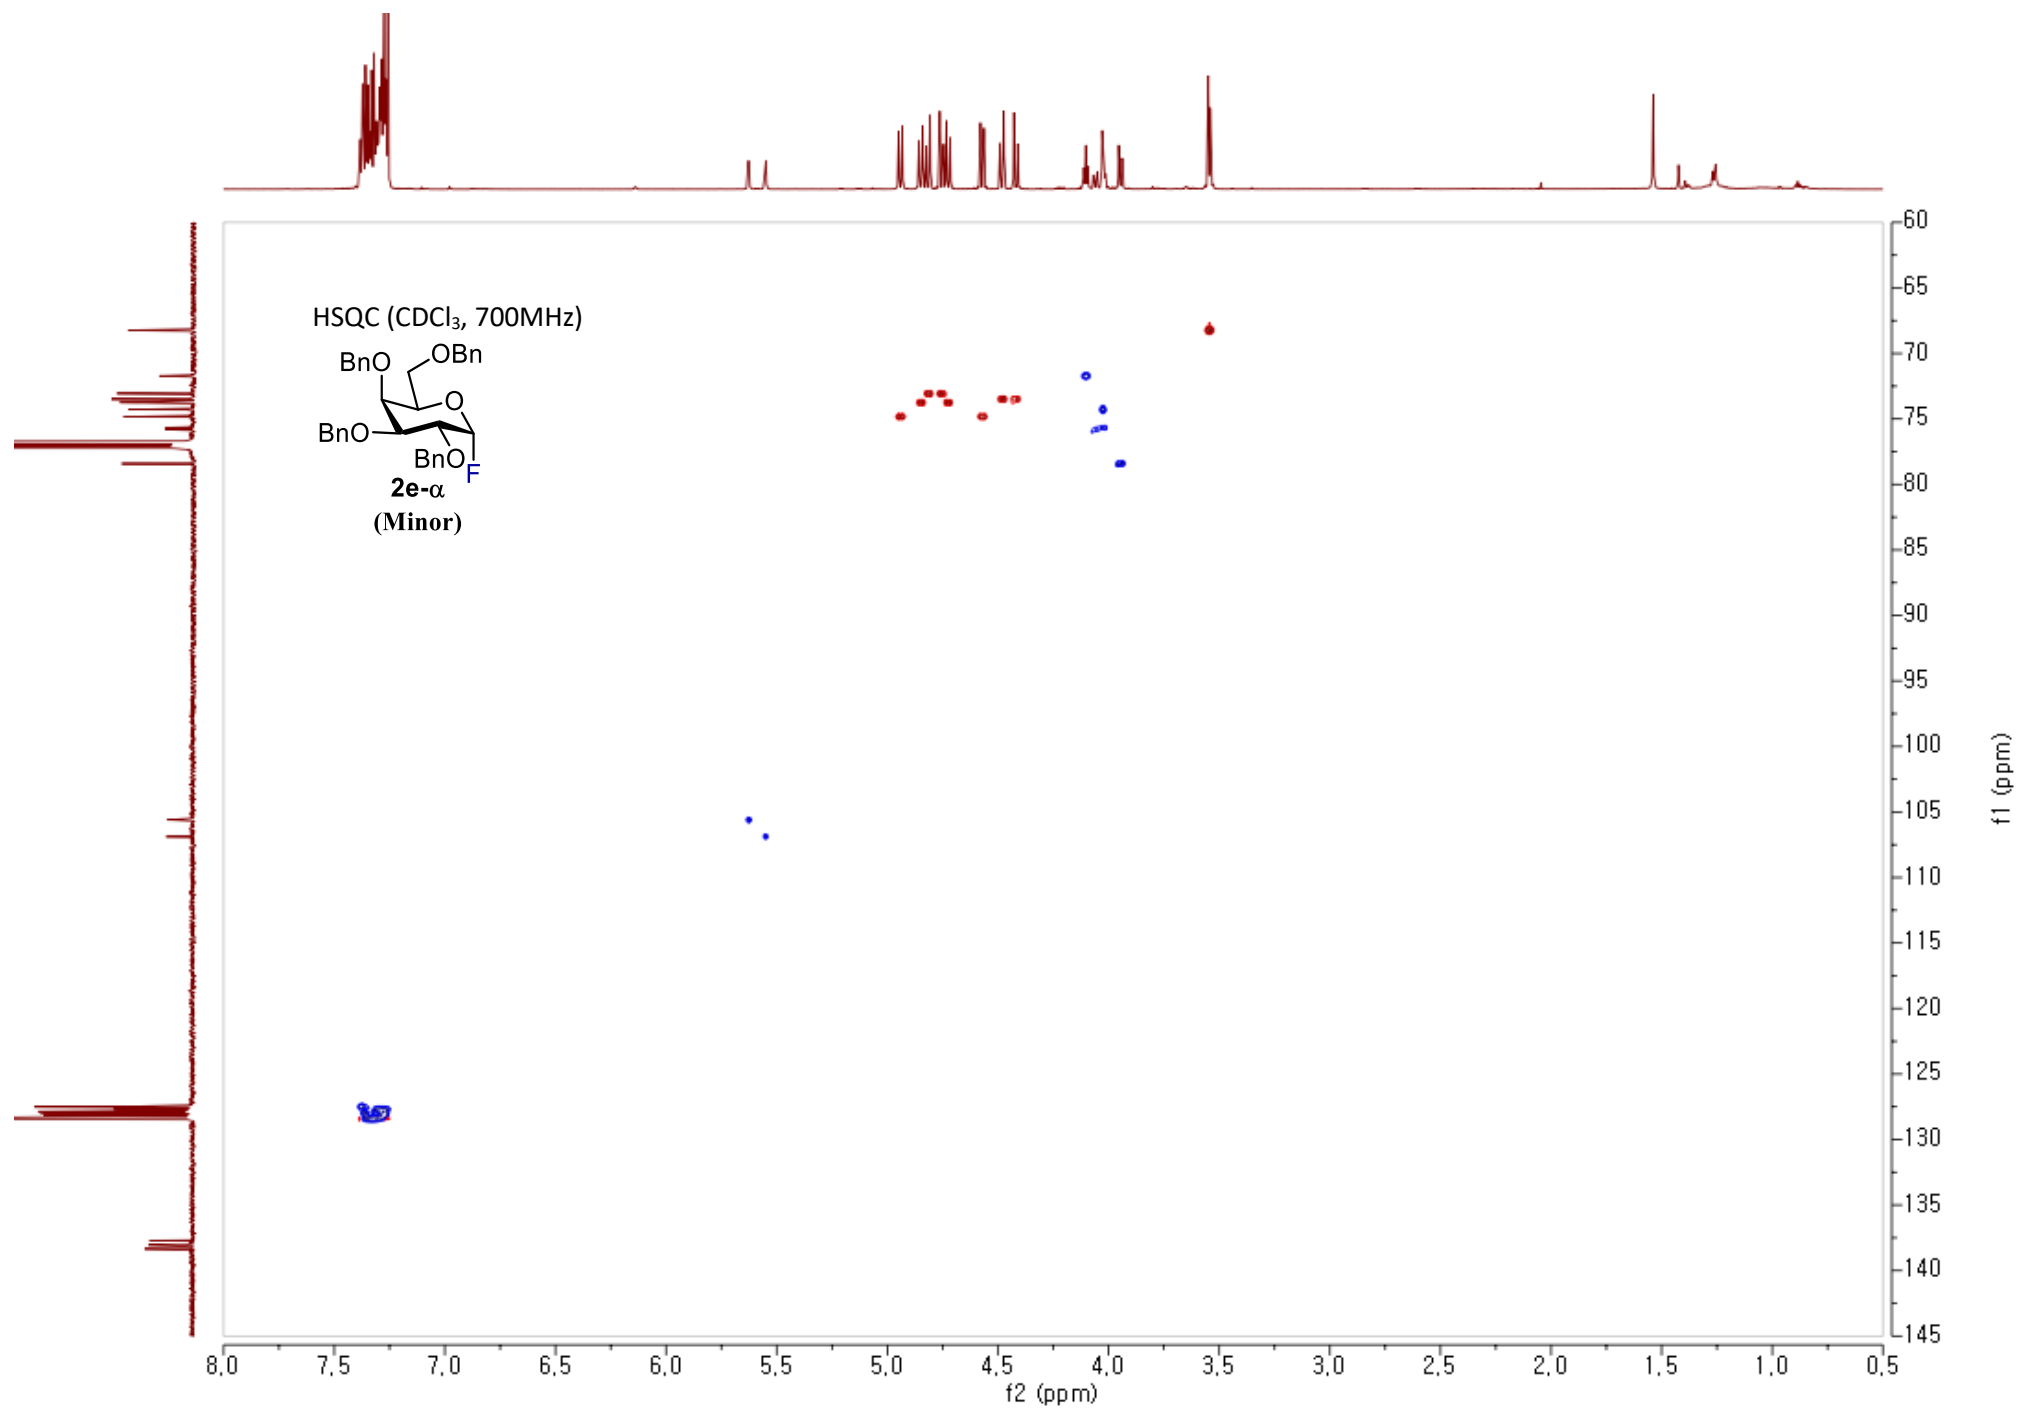

$^{19}\text{F}$  NMR ( $\text{CDCl}_3$ , 471MHz)

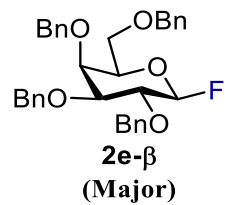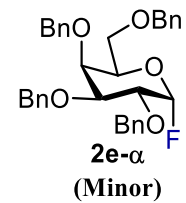

138.83  
138.86  
138.94  
138.97

150.11  
150.17  
150.23  
150.28

2.76

1.00

33 -134 -135 -136 -137 -138 -139 -140 -141 -142 -143 -144 -145 -146 -147 -148 -149 -150 -151 -152 -153 -154 -1

f1 (ppm)

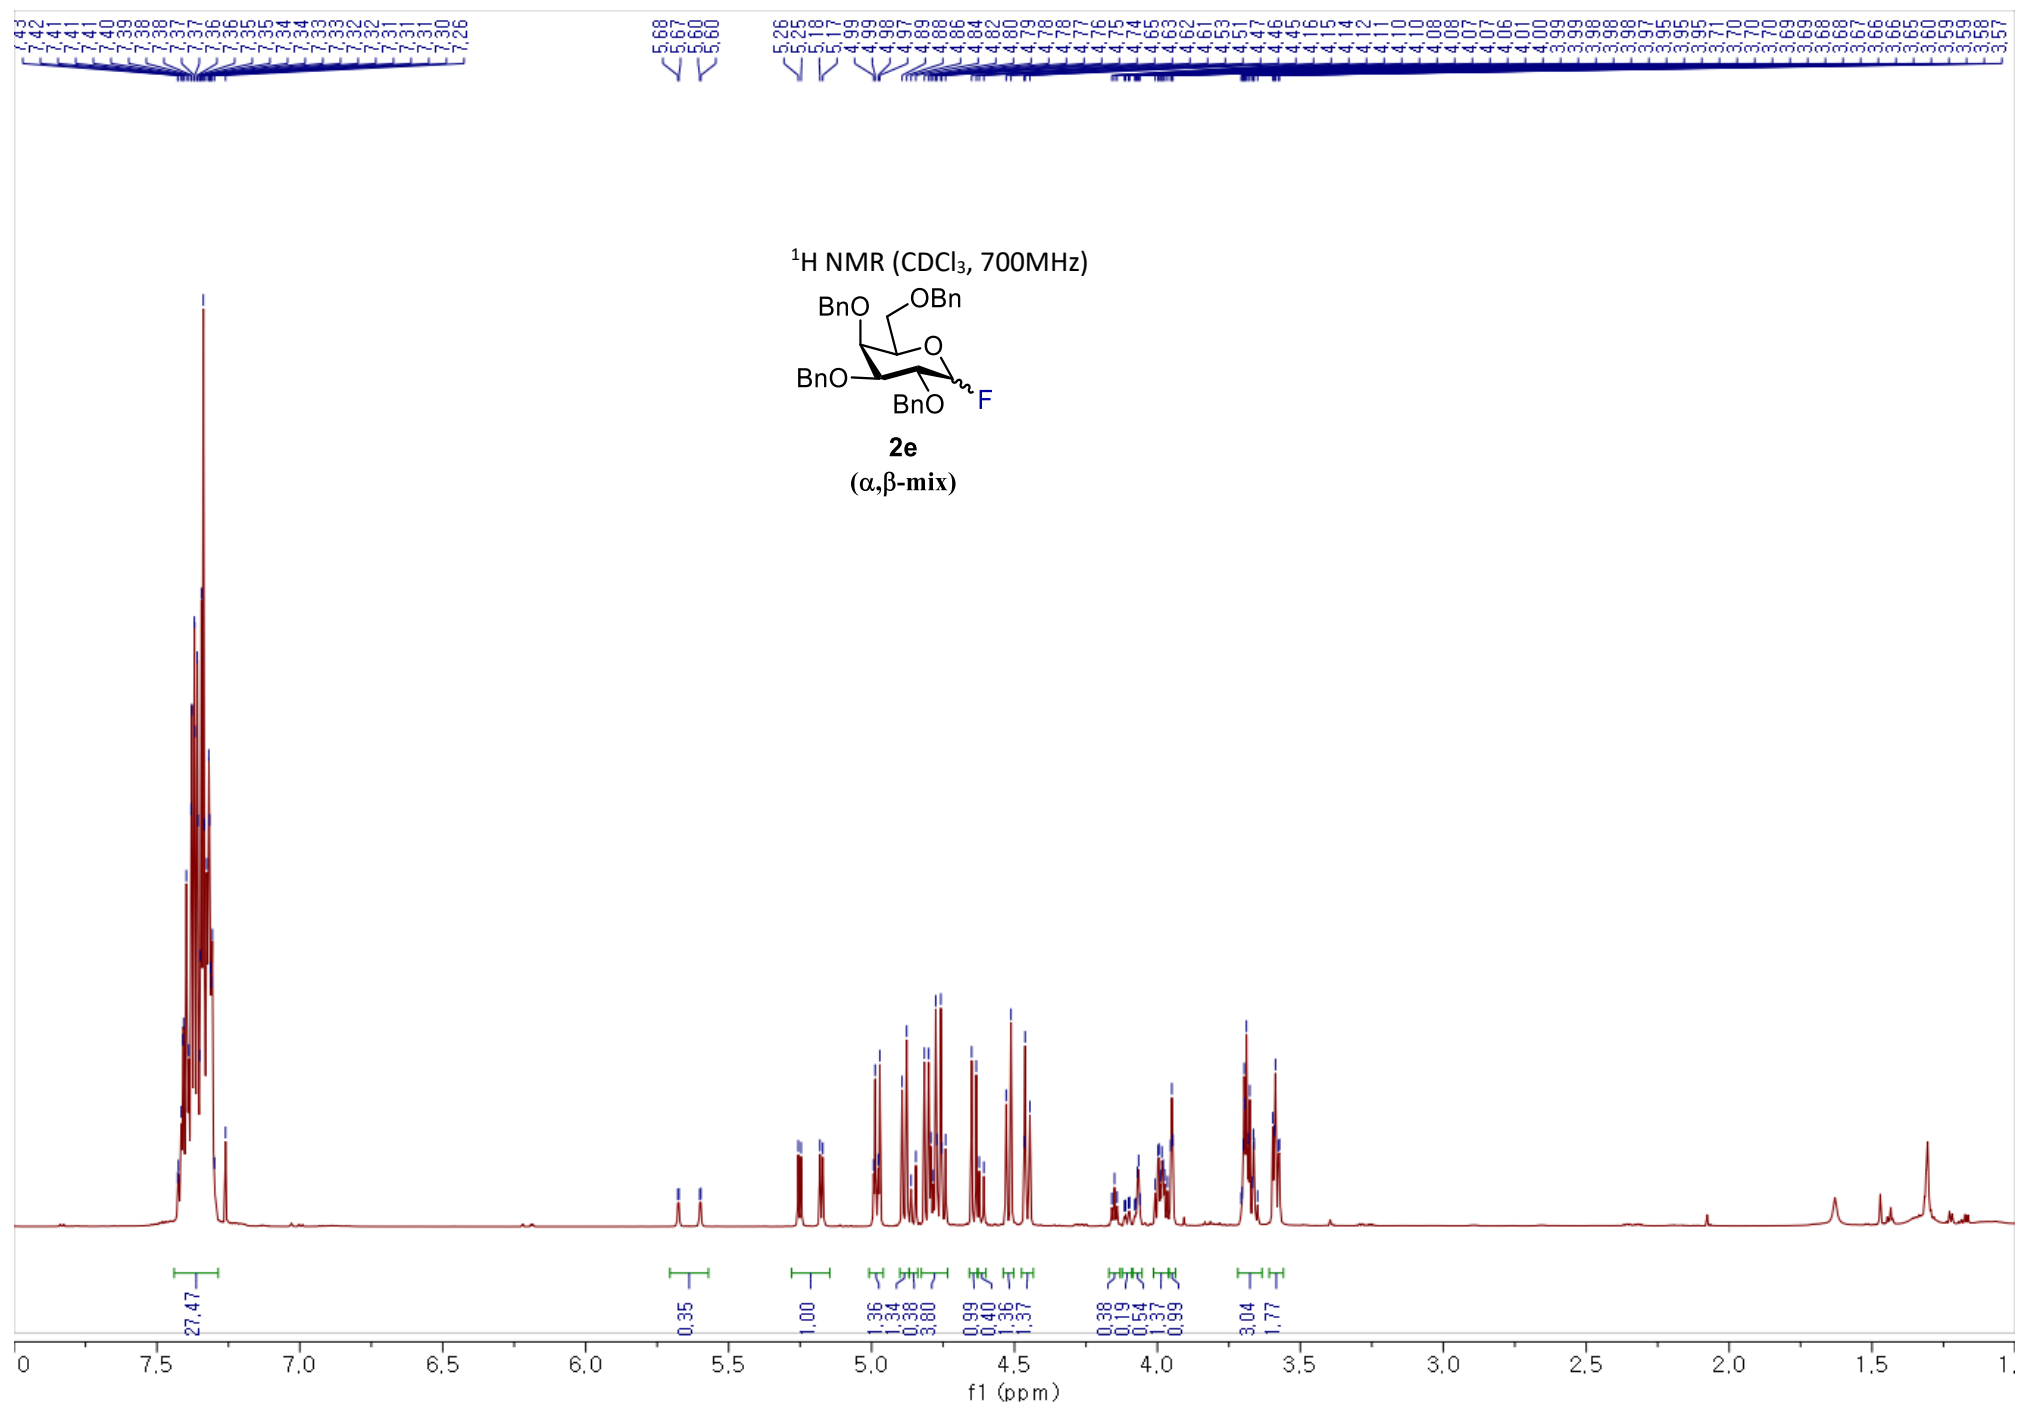

2,3,4,6-Tetrakis-*O*-(phenylmethyl)- $\alpha$ -D-Mannopyranosyl fluoride (2f- $\alpha$ , Major diastereomer)

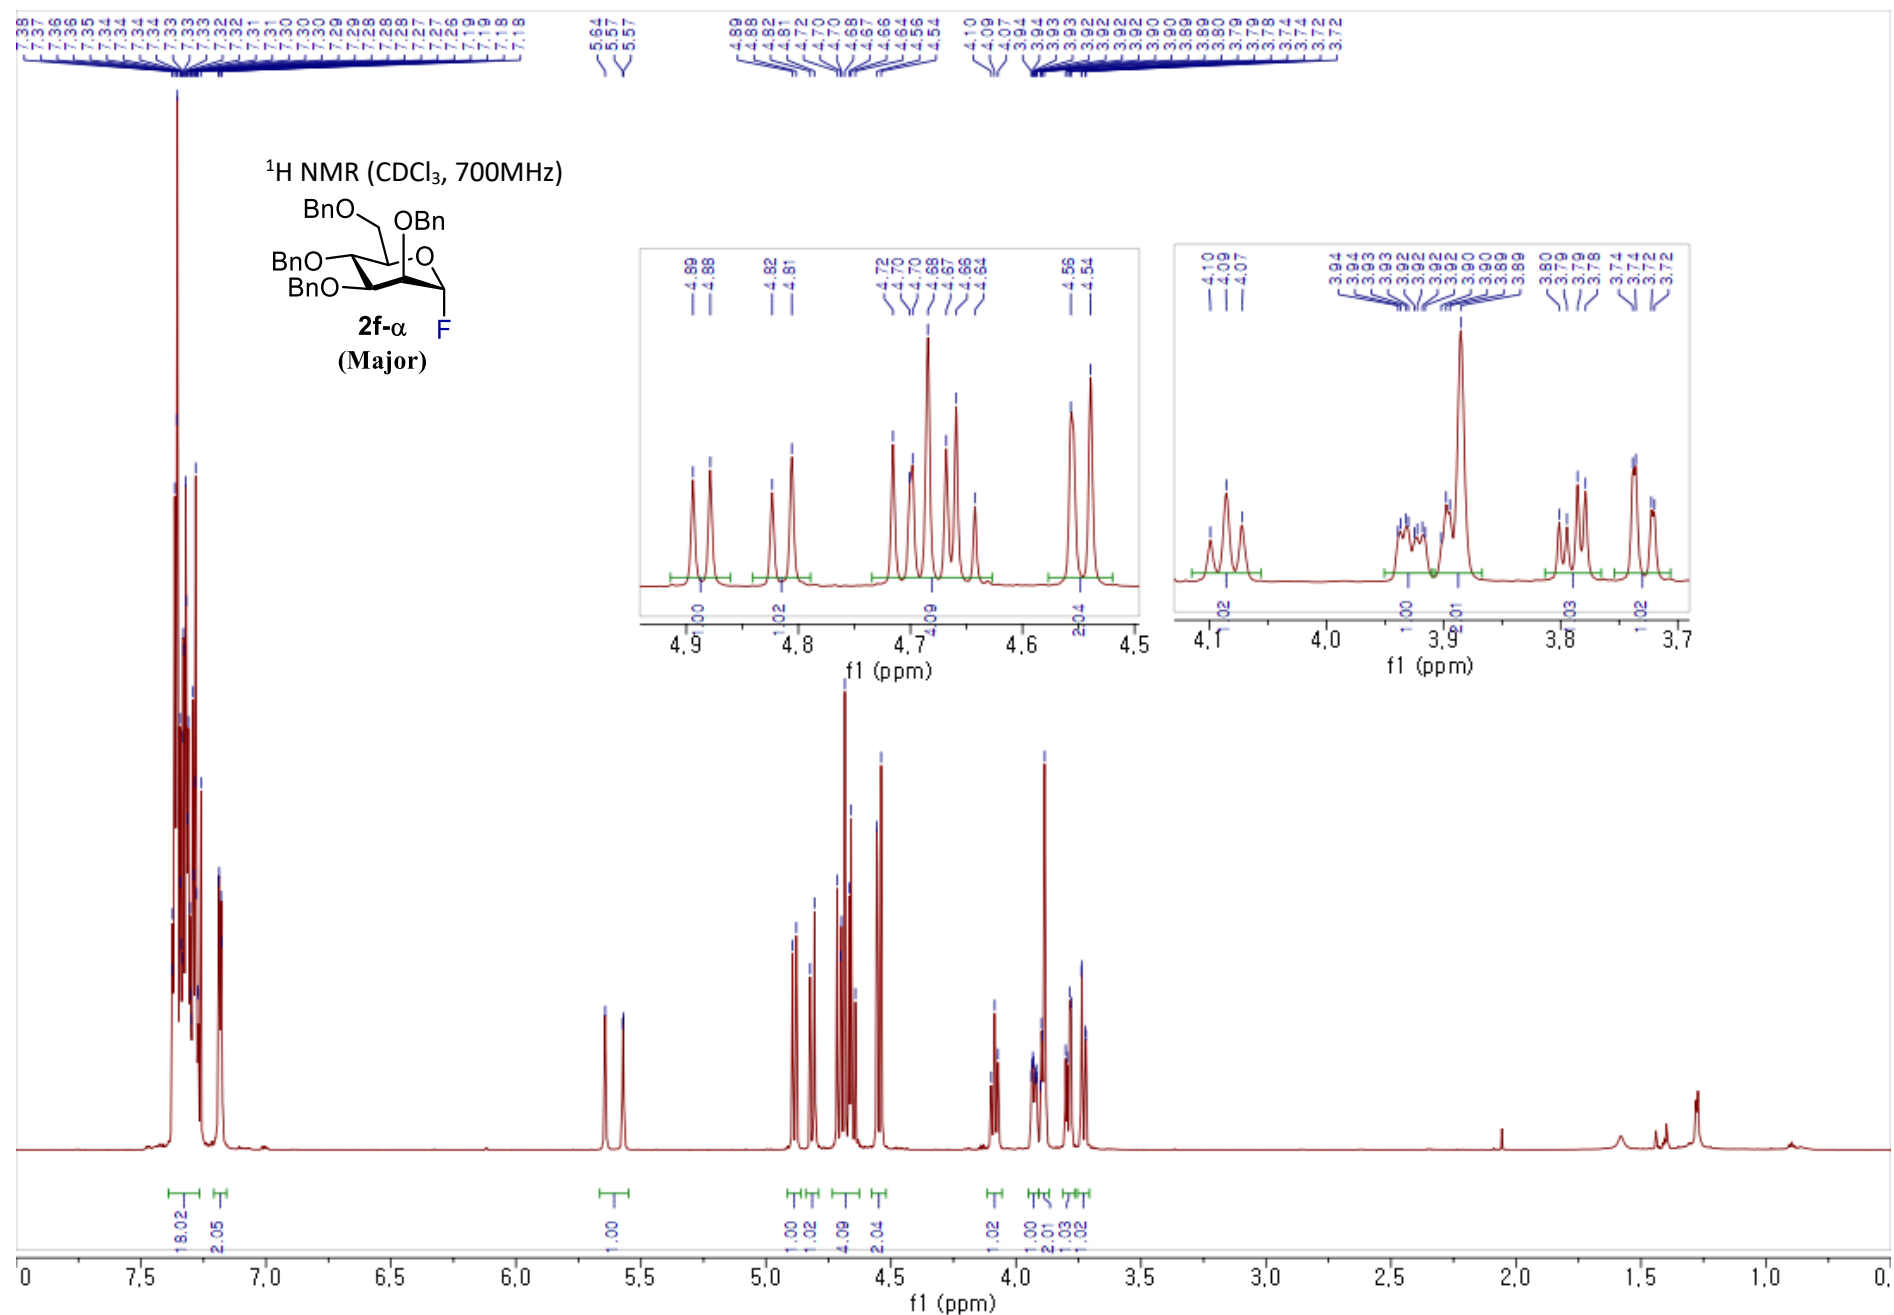



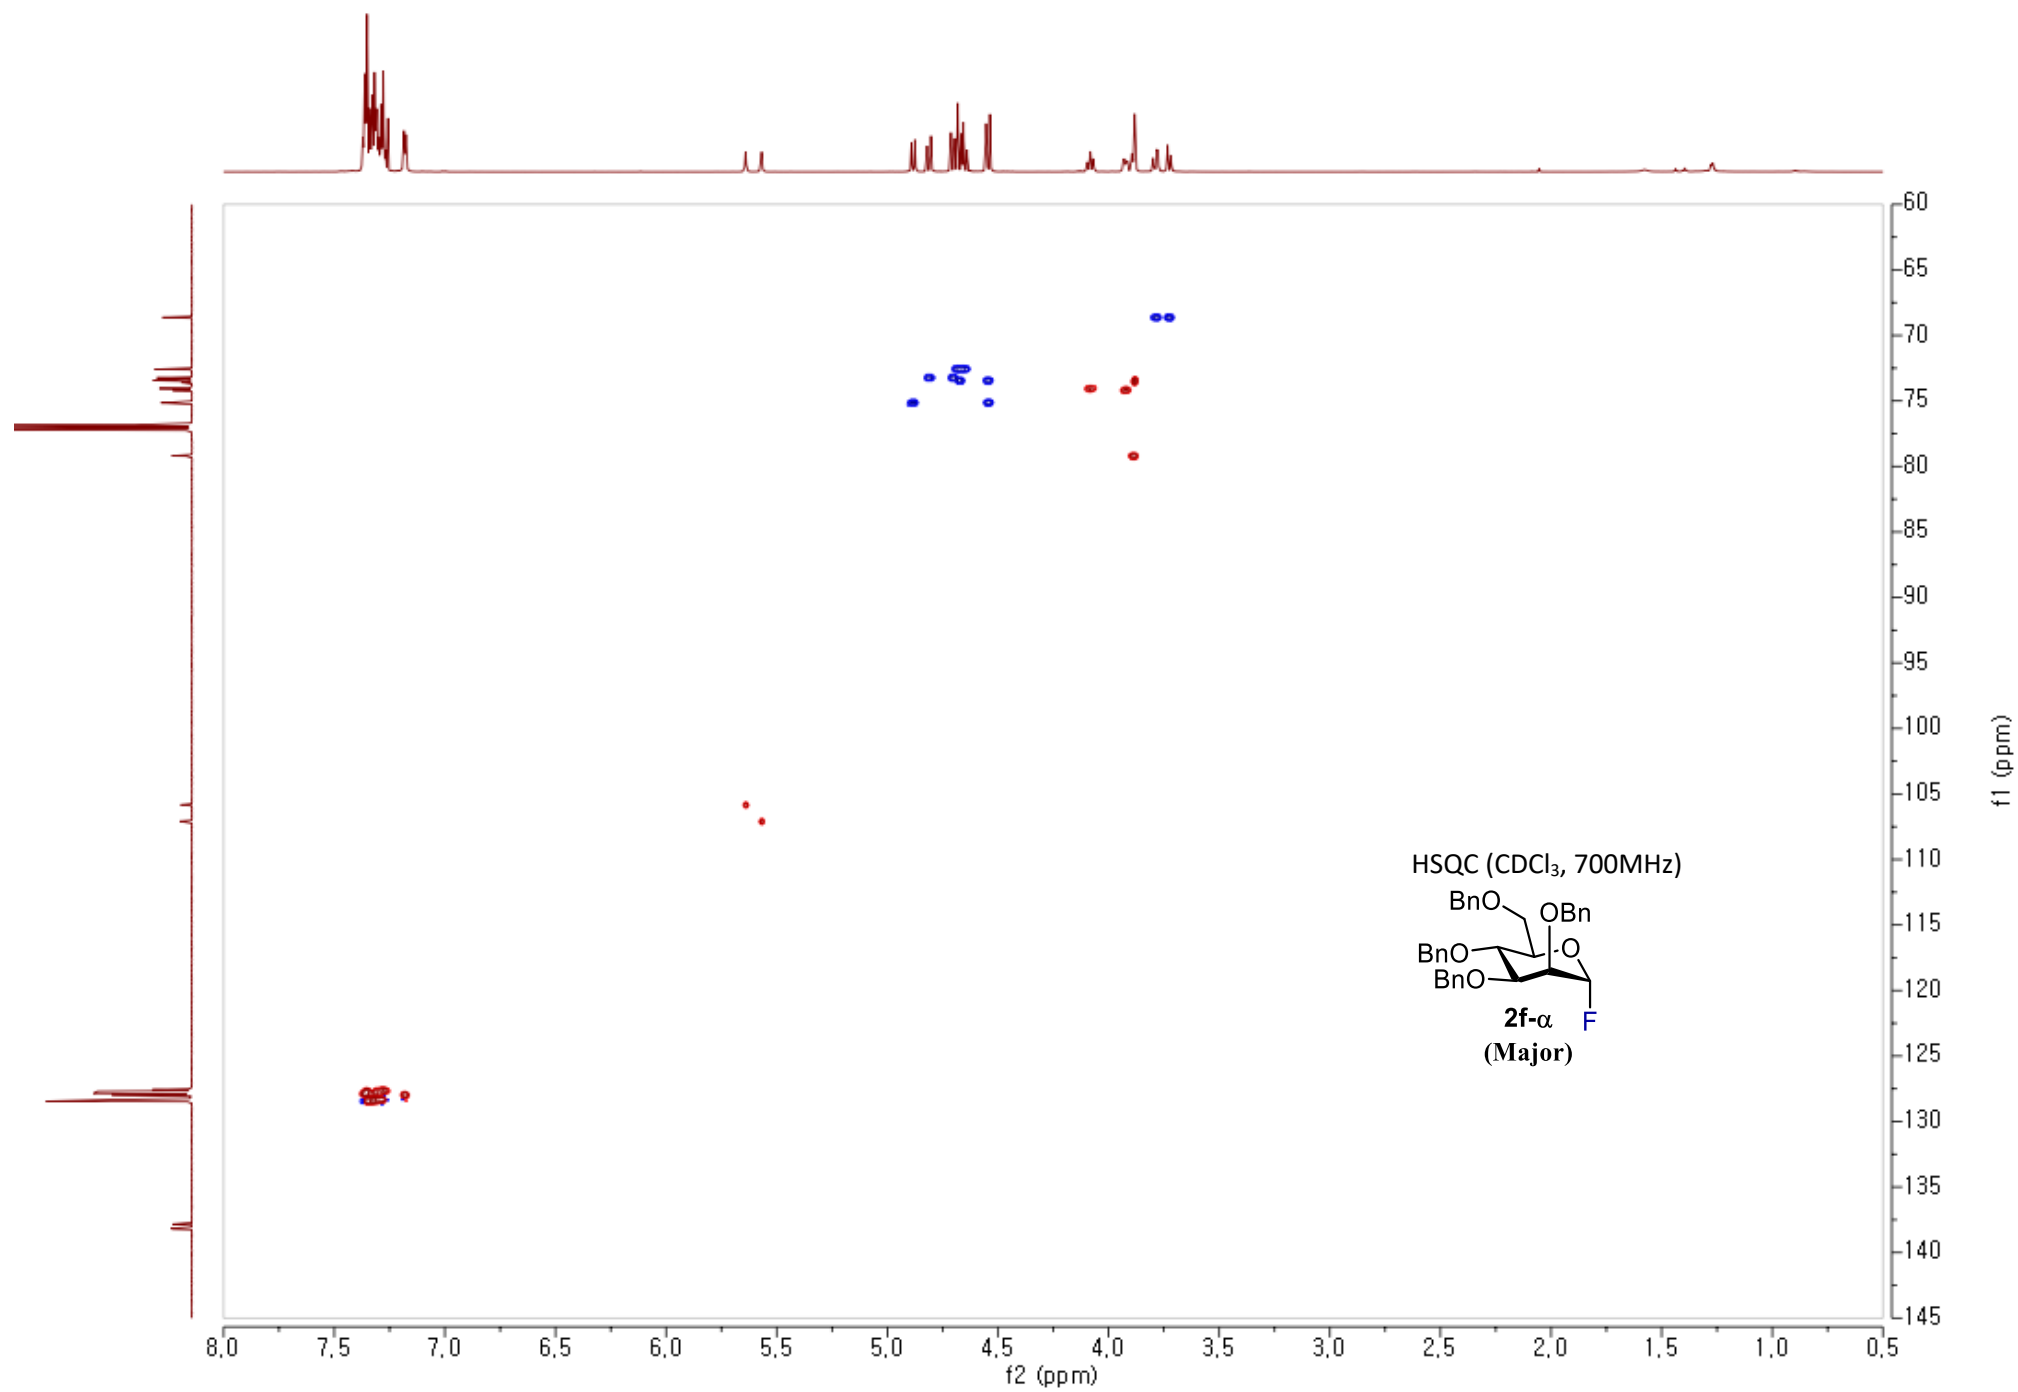

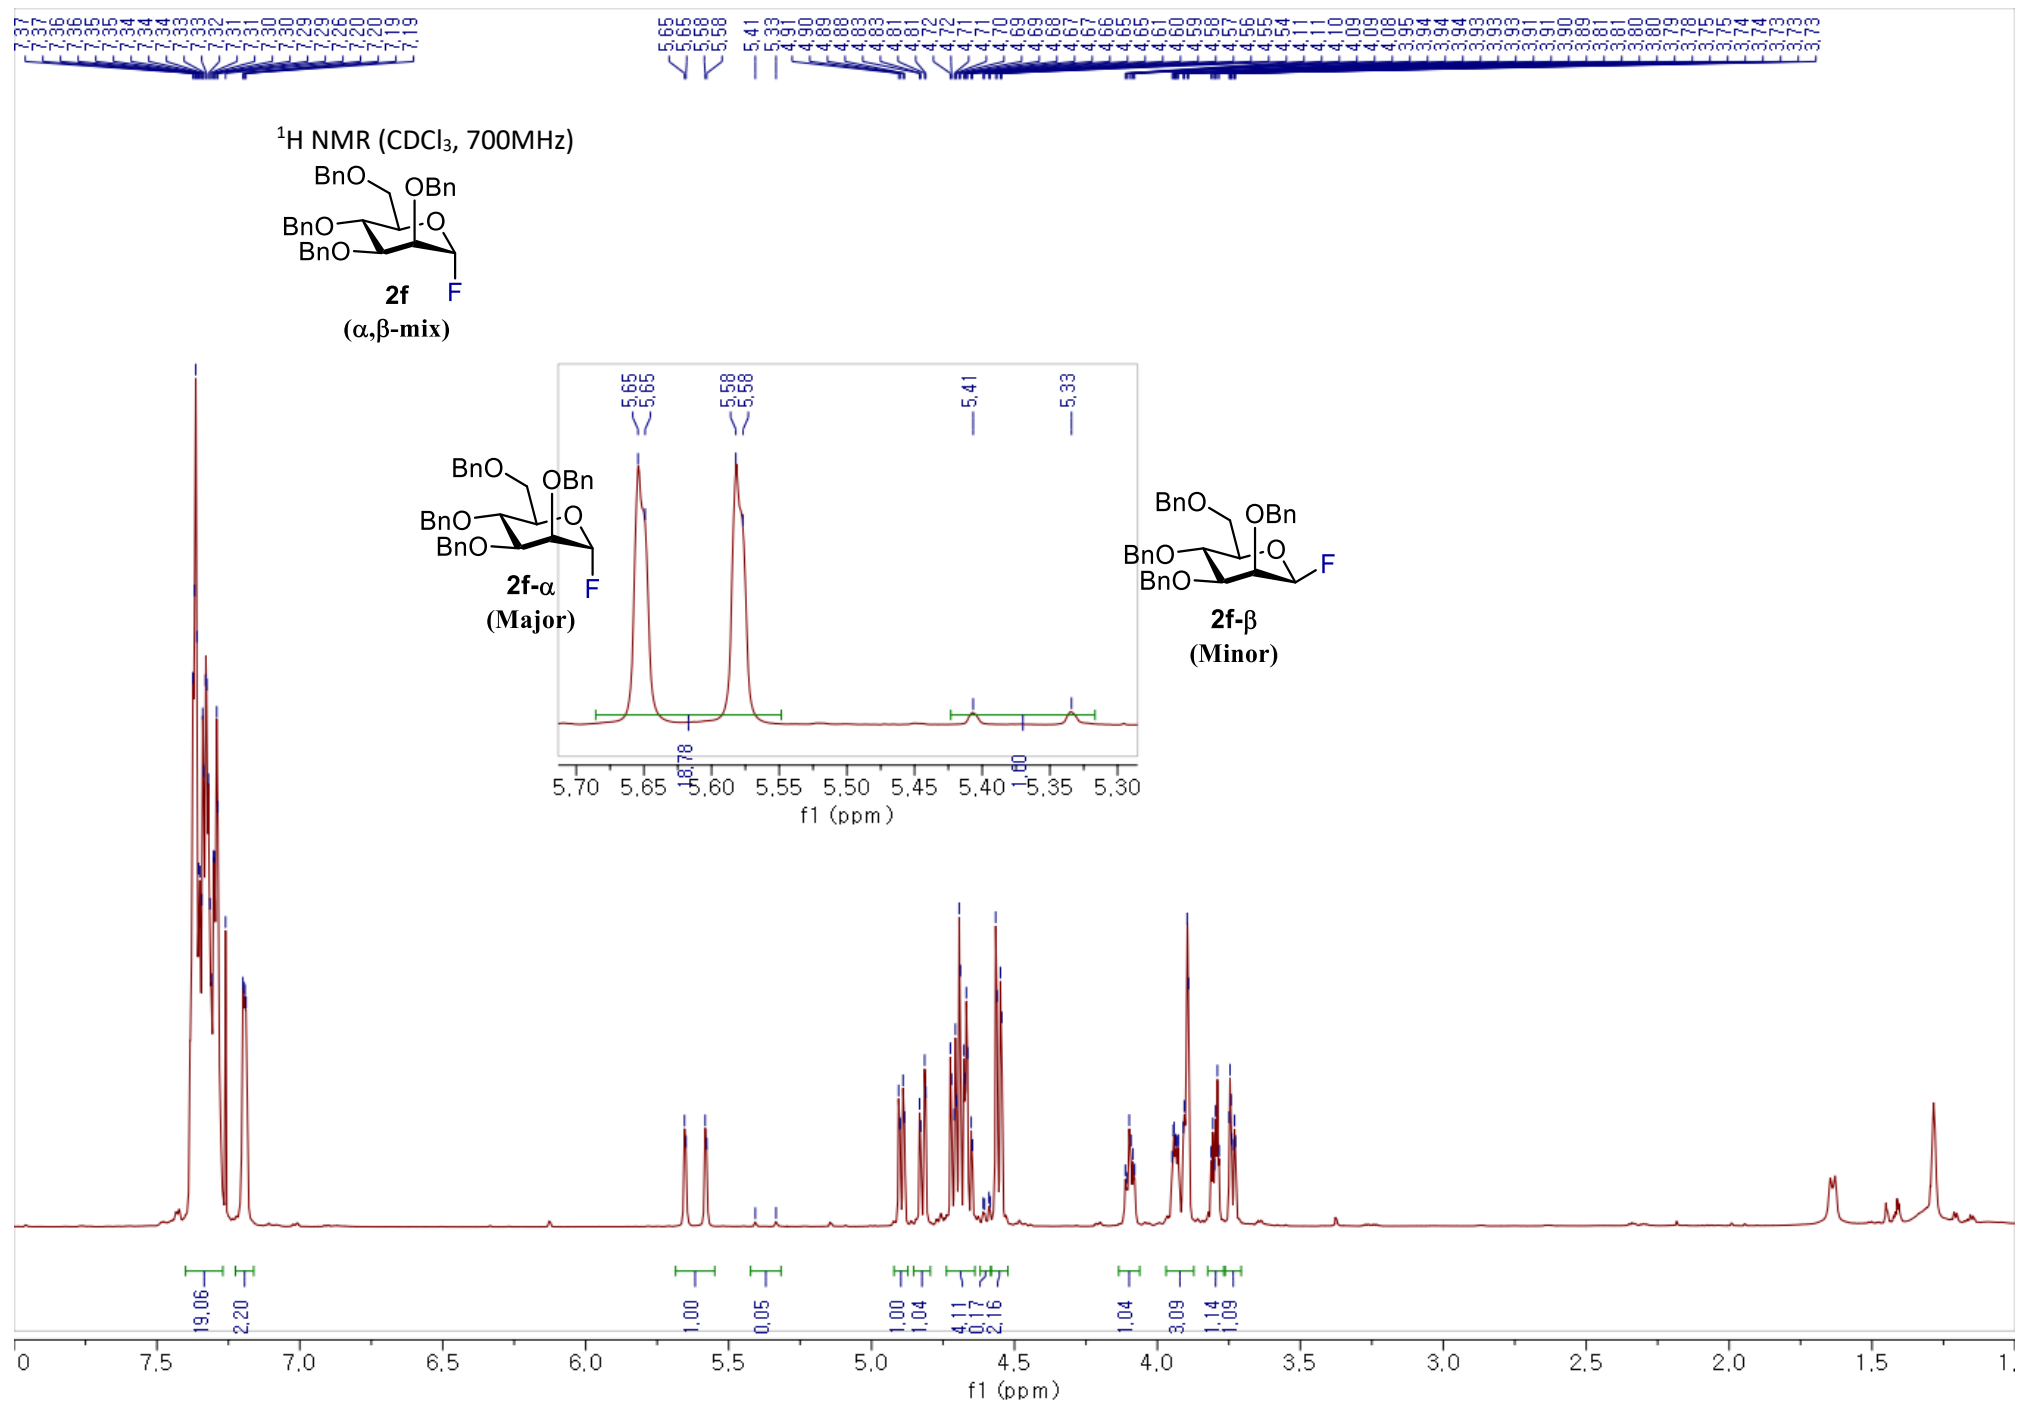

2,3,4,6-Tetrakis-*O*-(phenylmethyl)-D-glucopyranosyl fluoride (2g, Isolated as  $\alpha : \beta = 1 : 3.7$ )

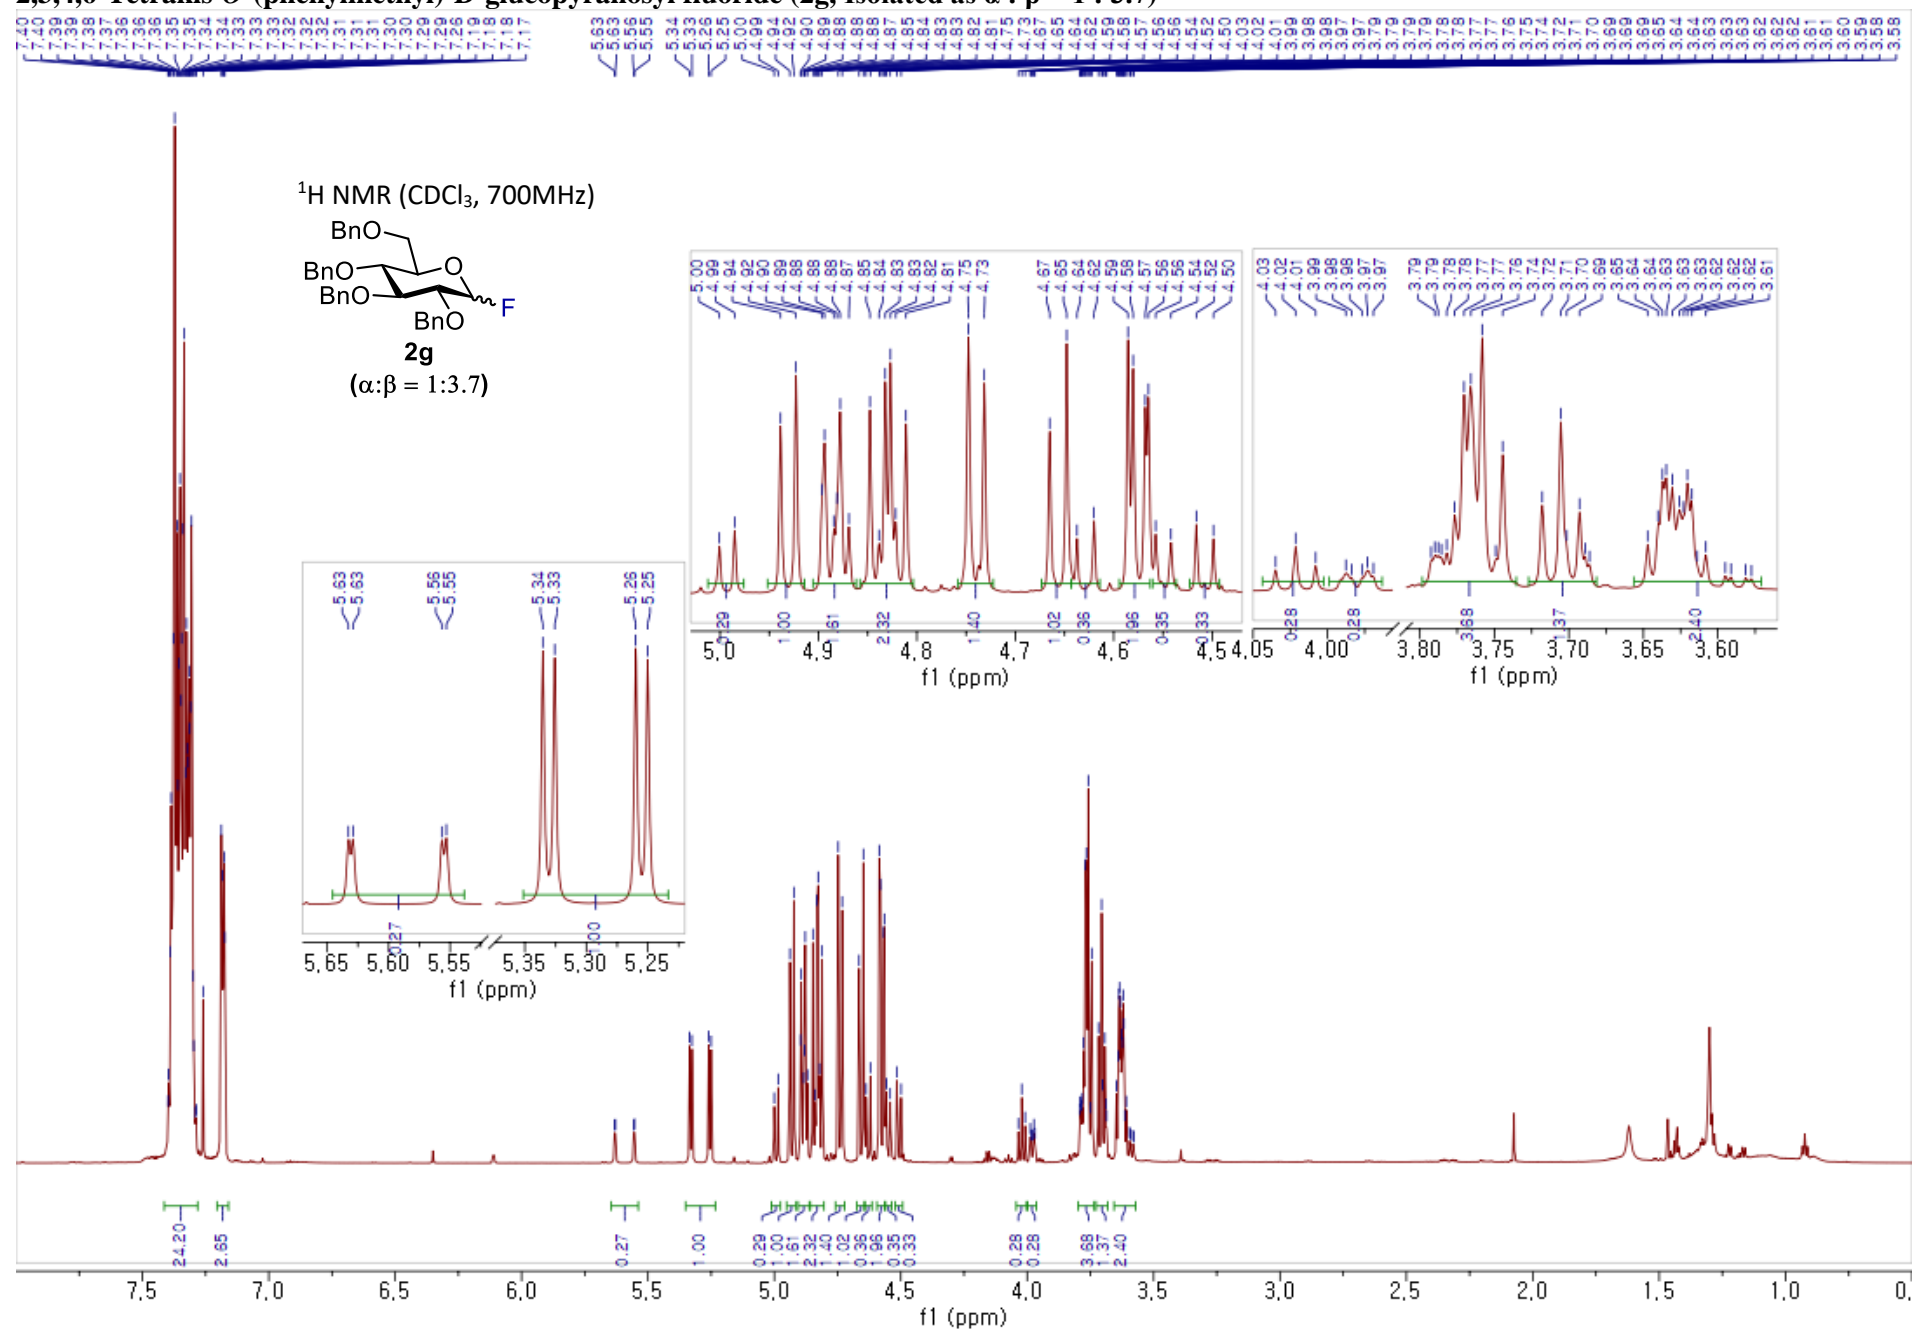

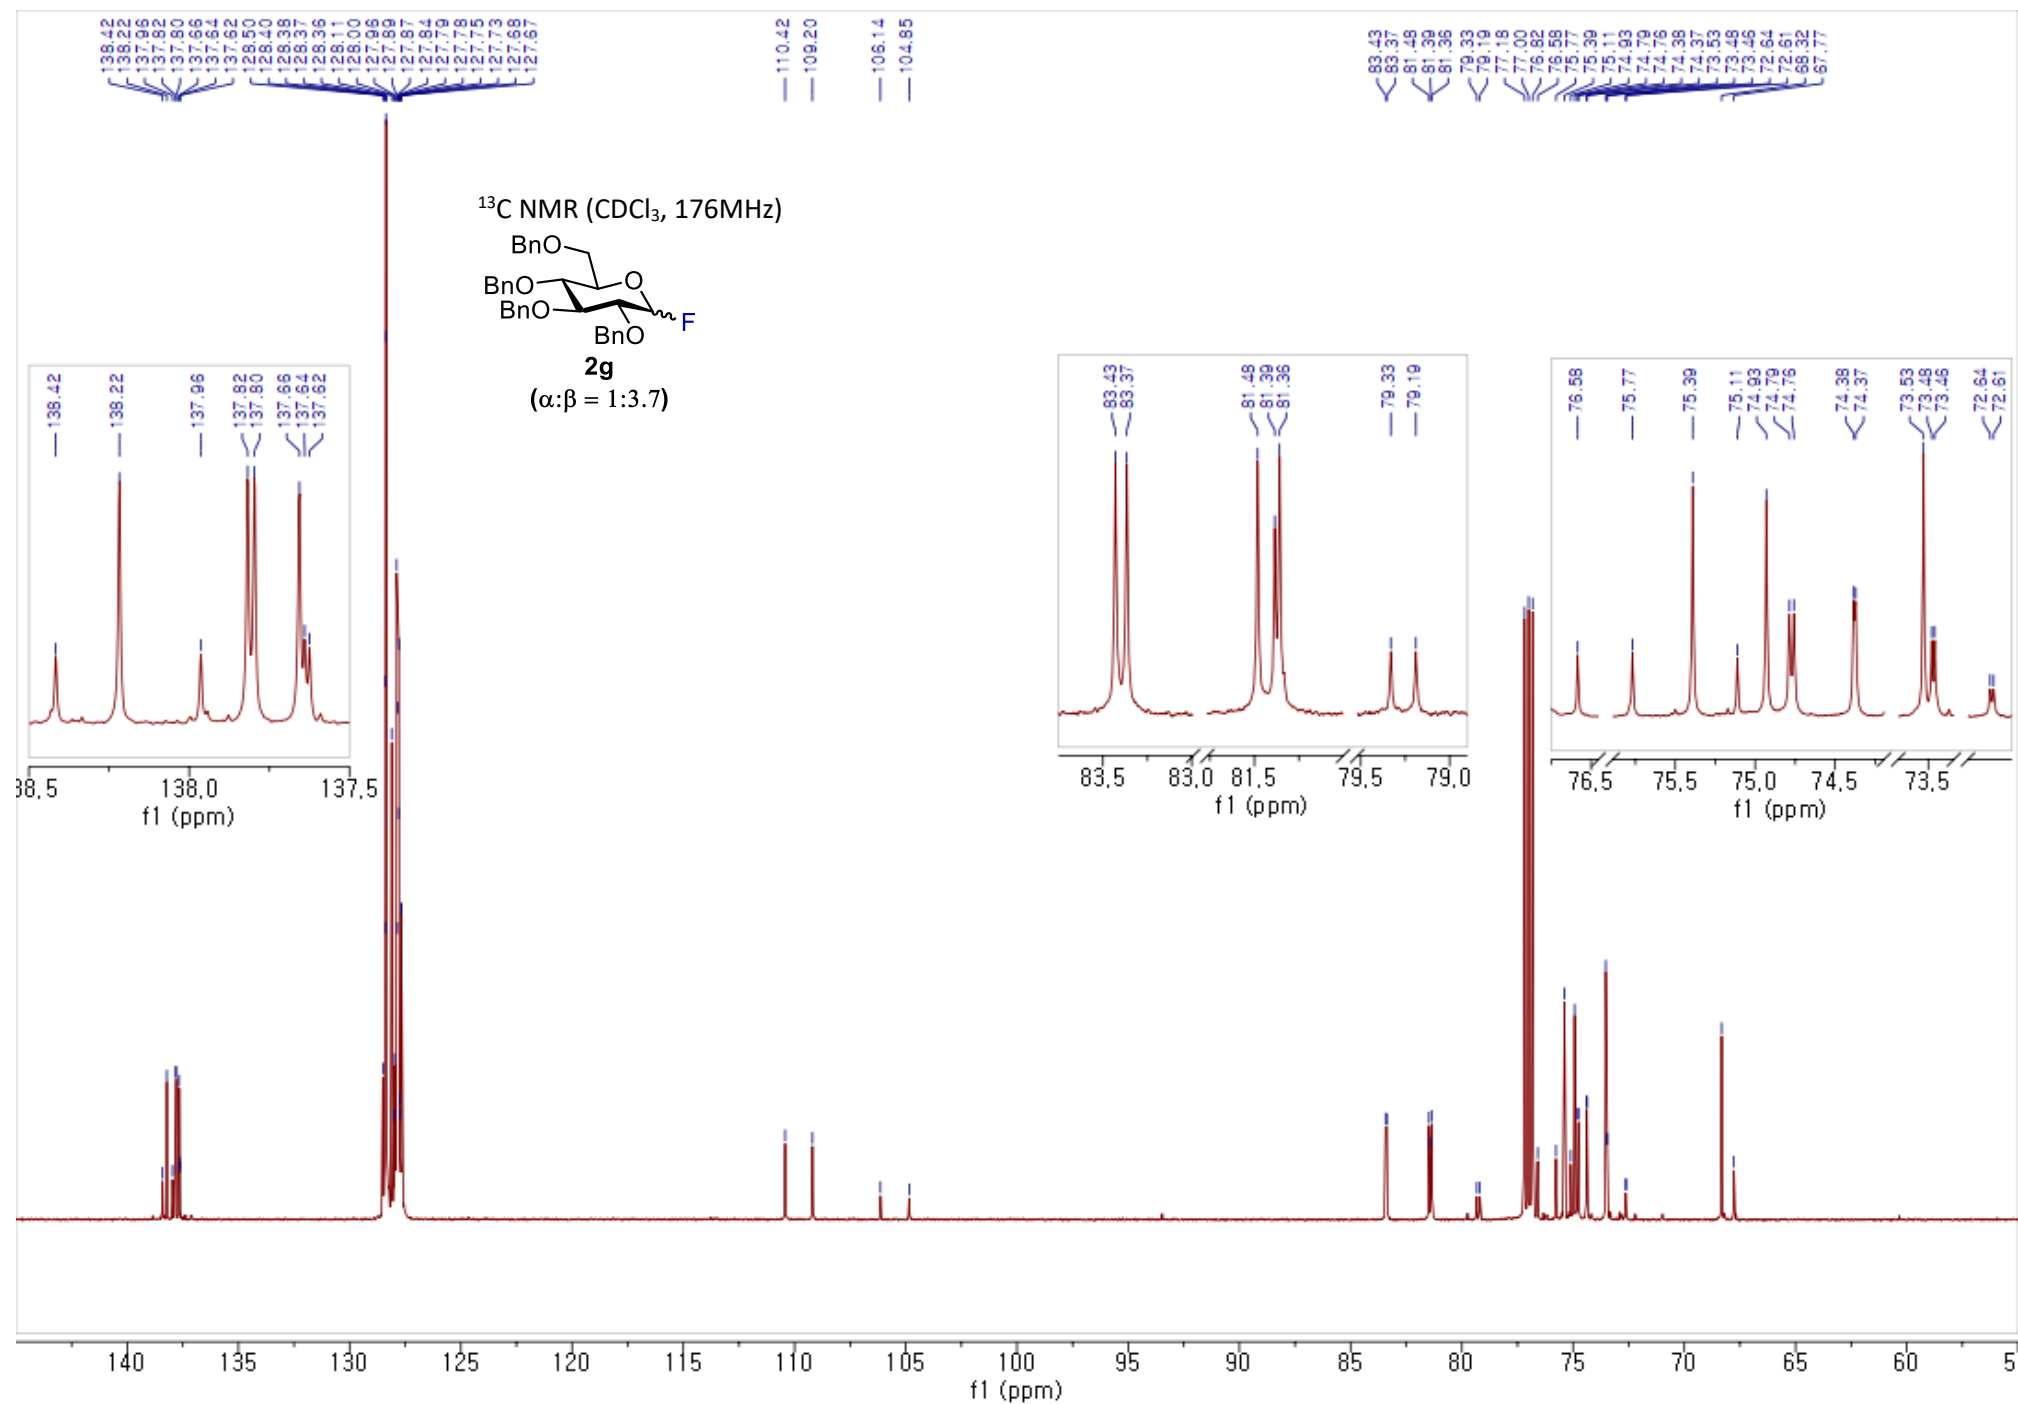

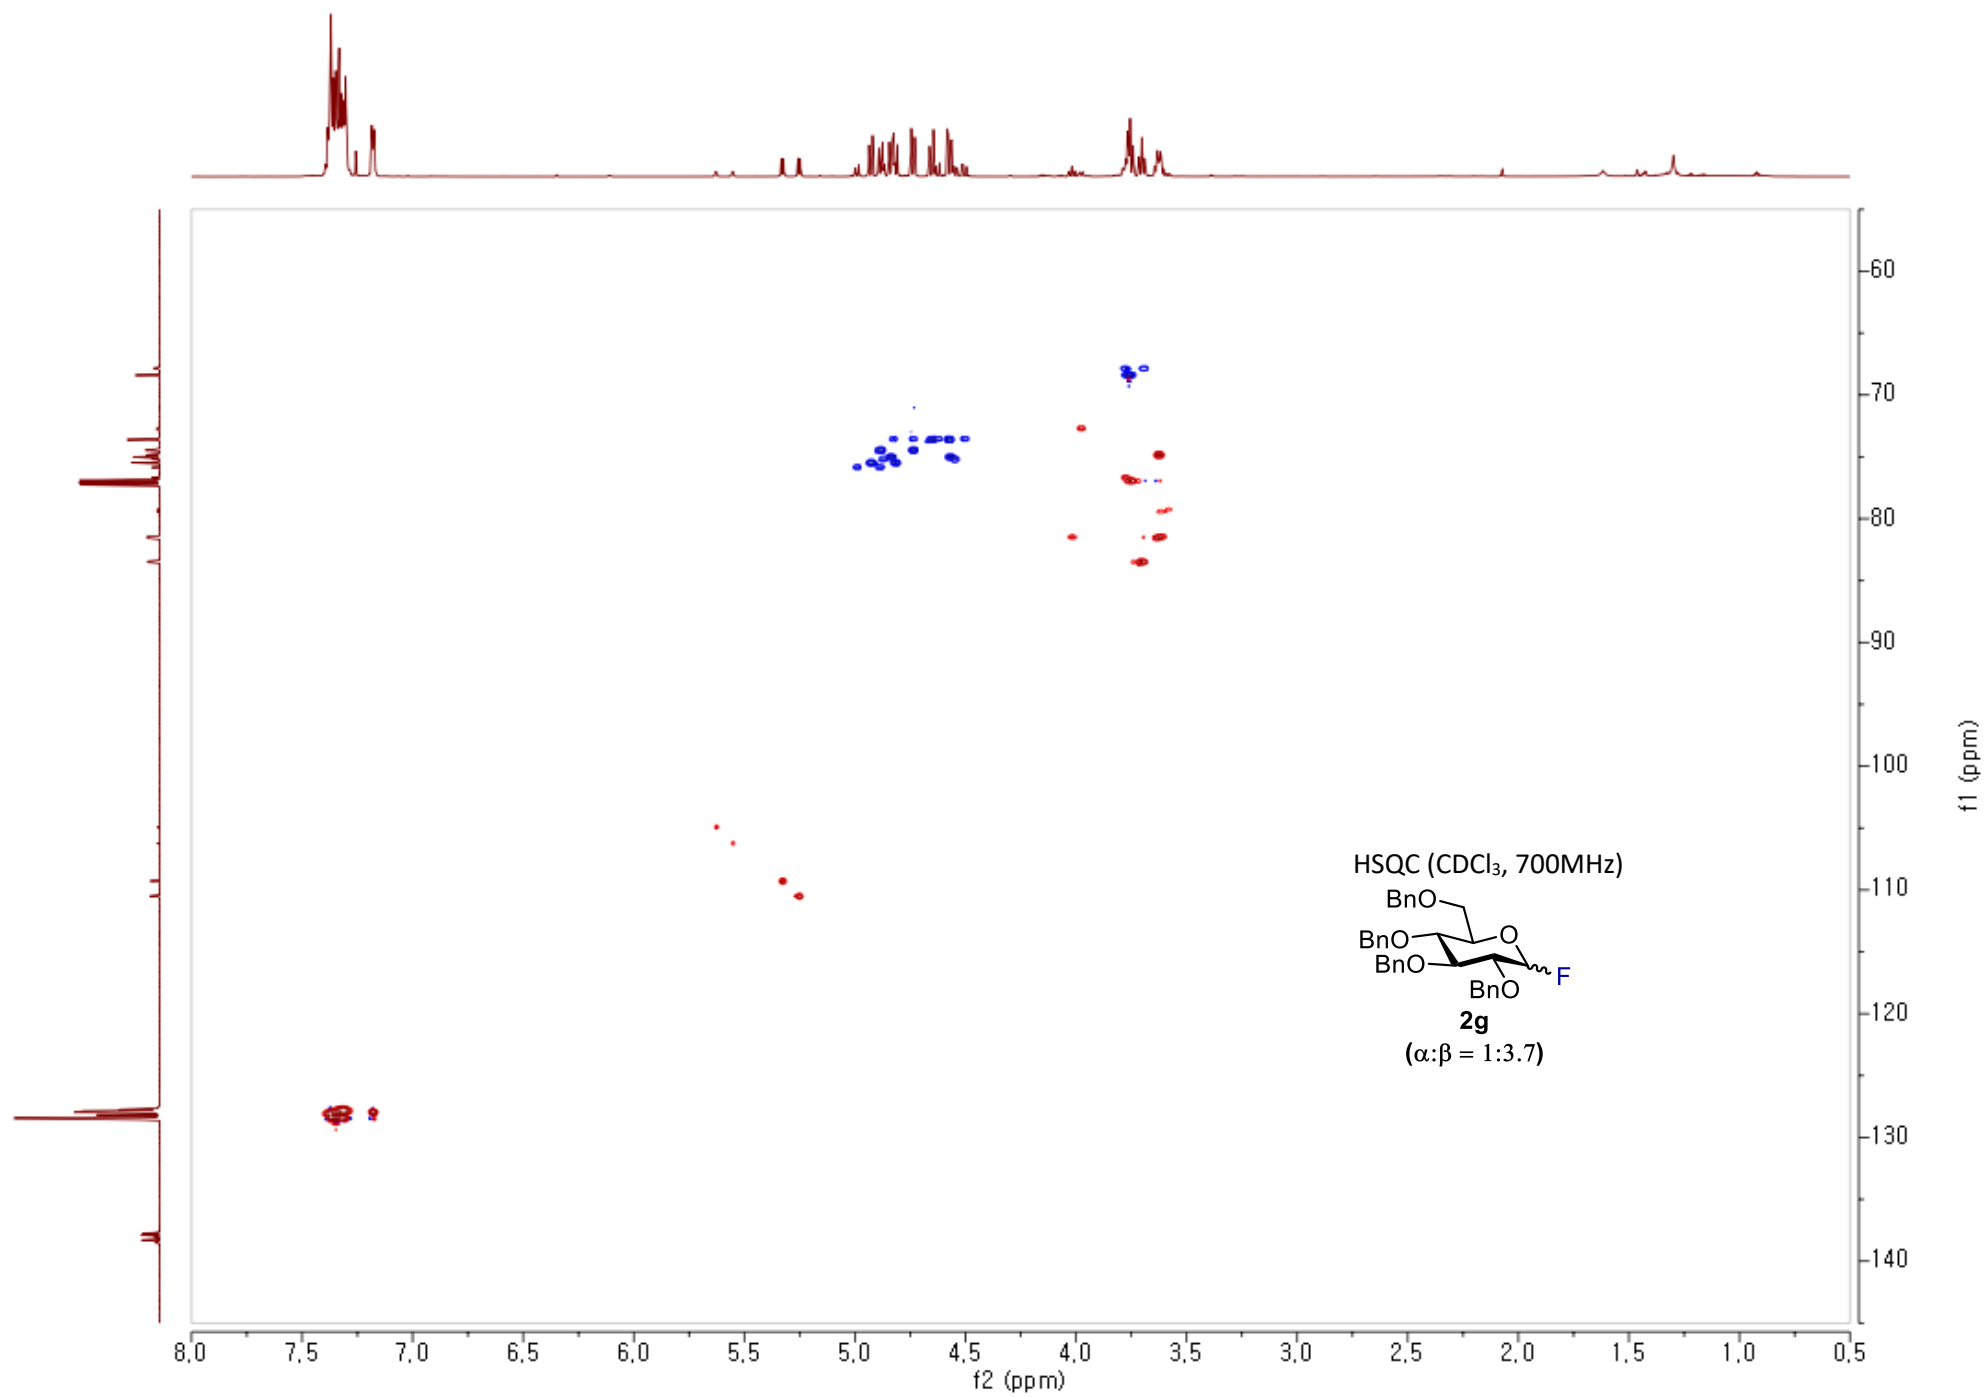

**2,3,4-Tris-O-(phenylmethyl)- $\alpha$ -L-rhamnopyranosyl fluoride (2h- $\alpha$ , Major diastereomer)**

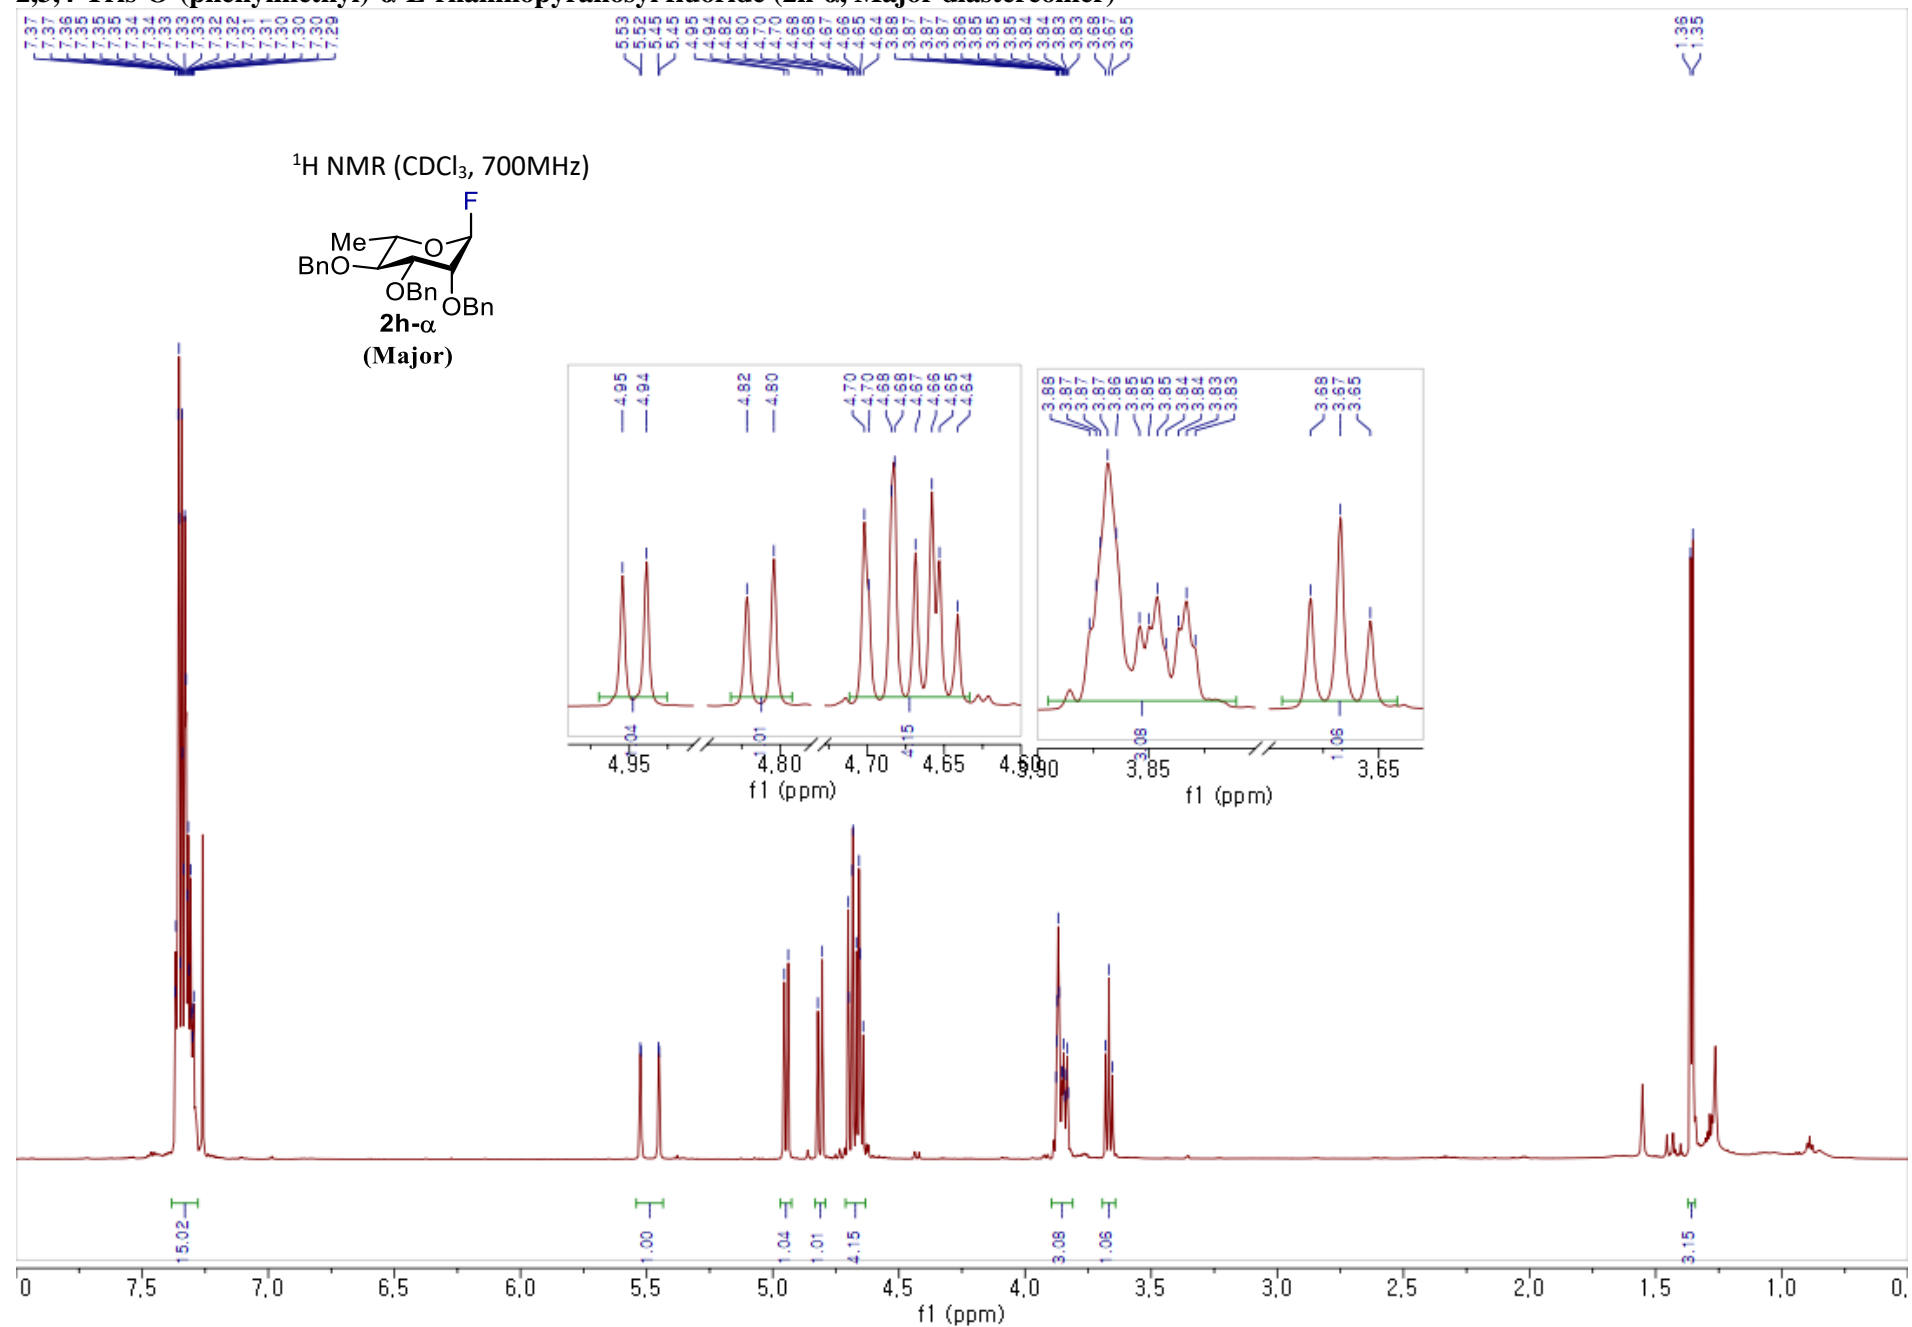

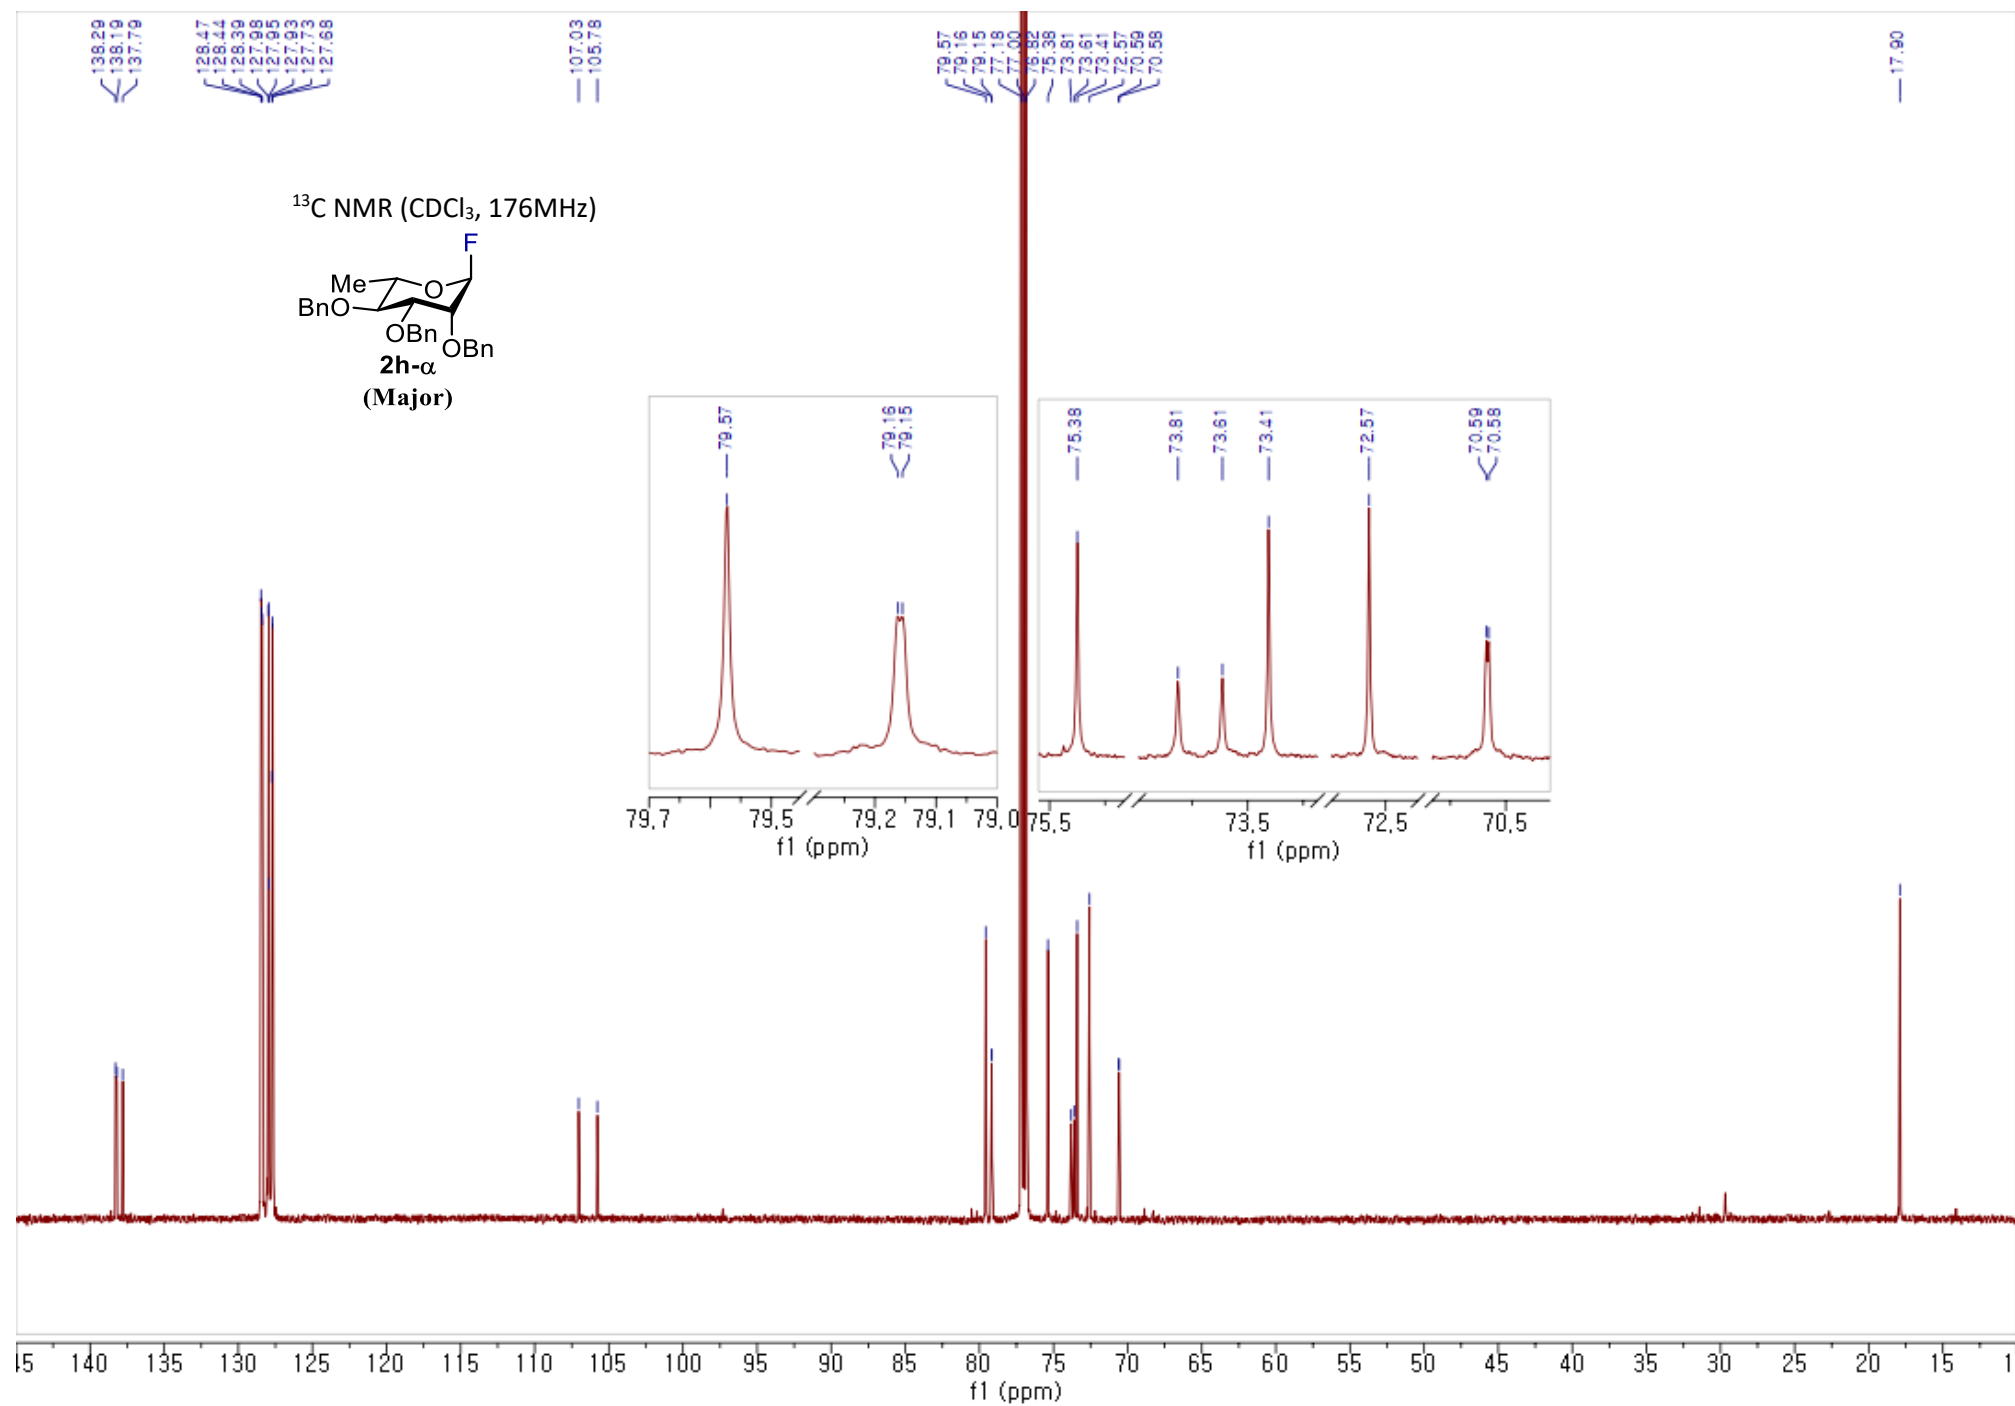

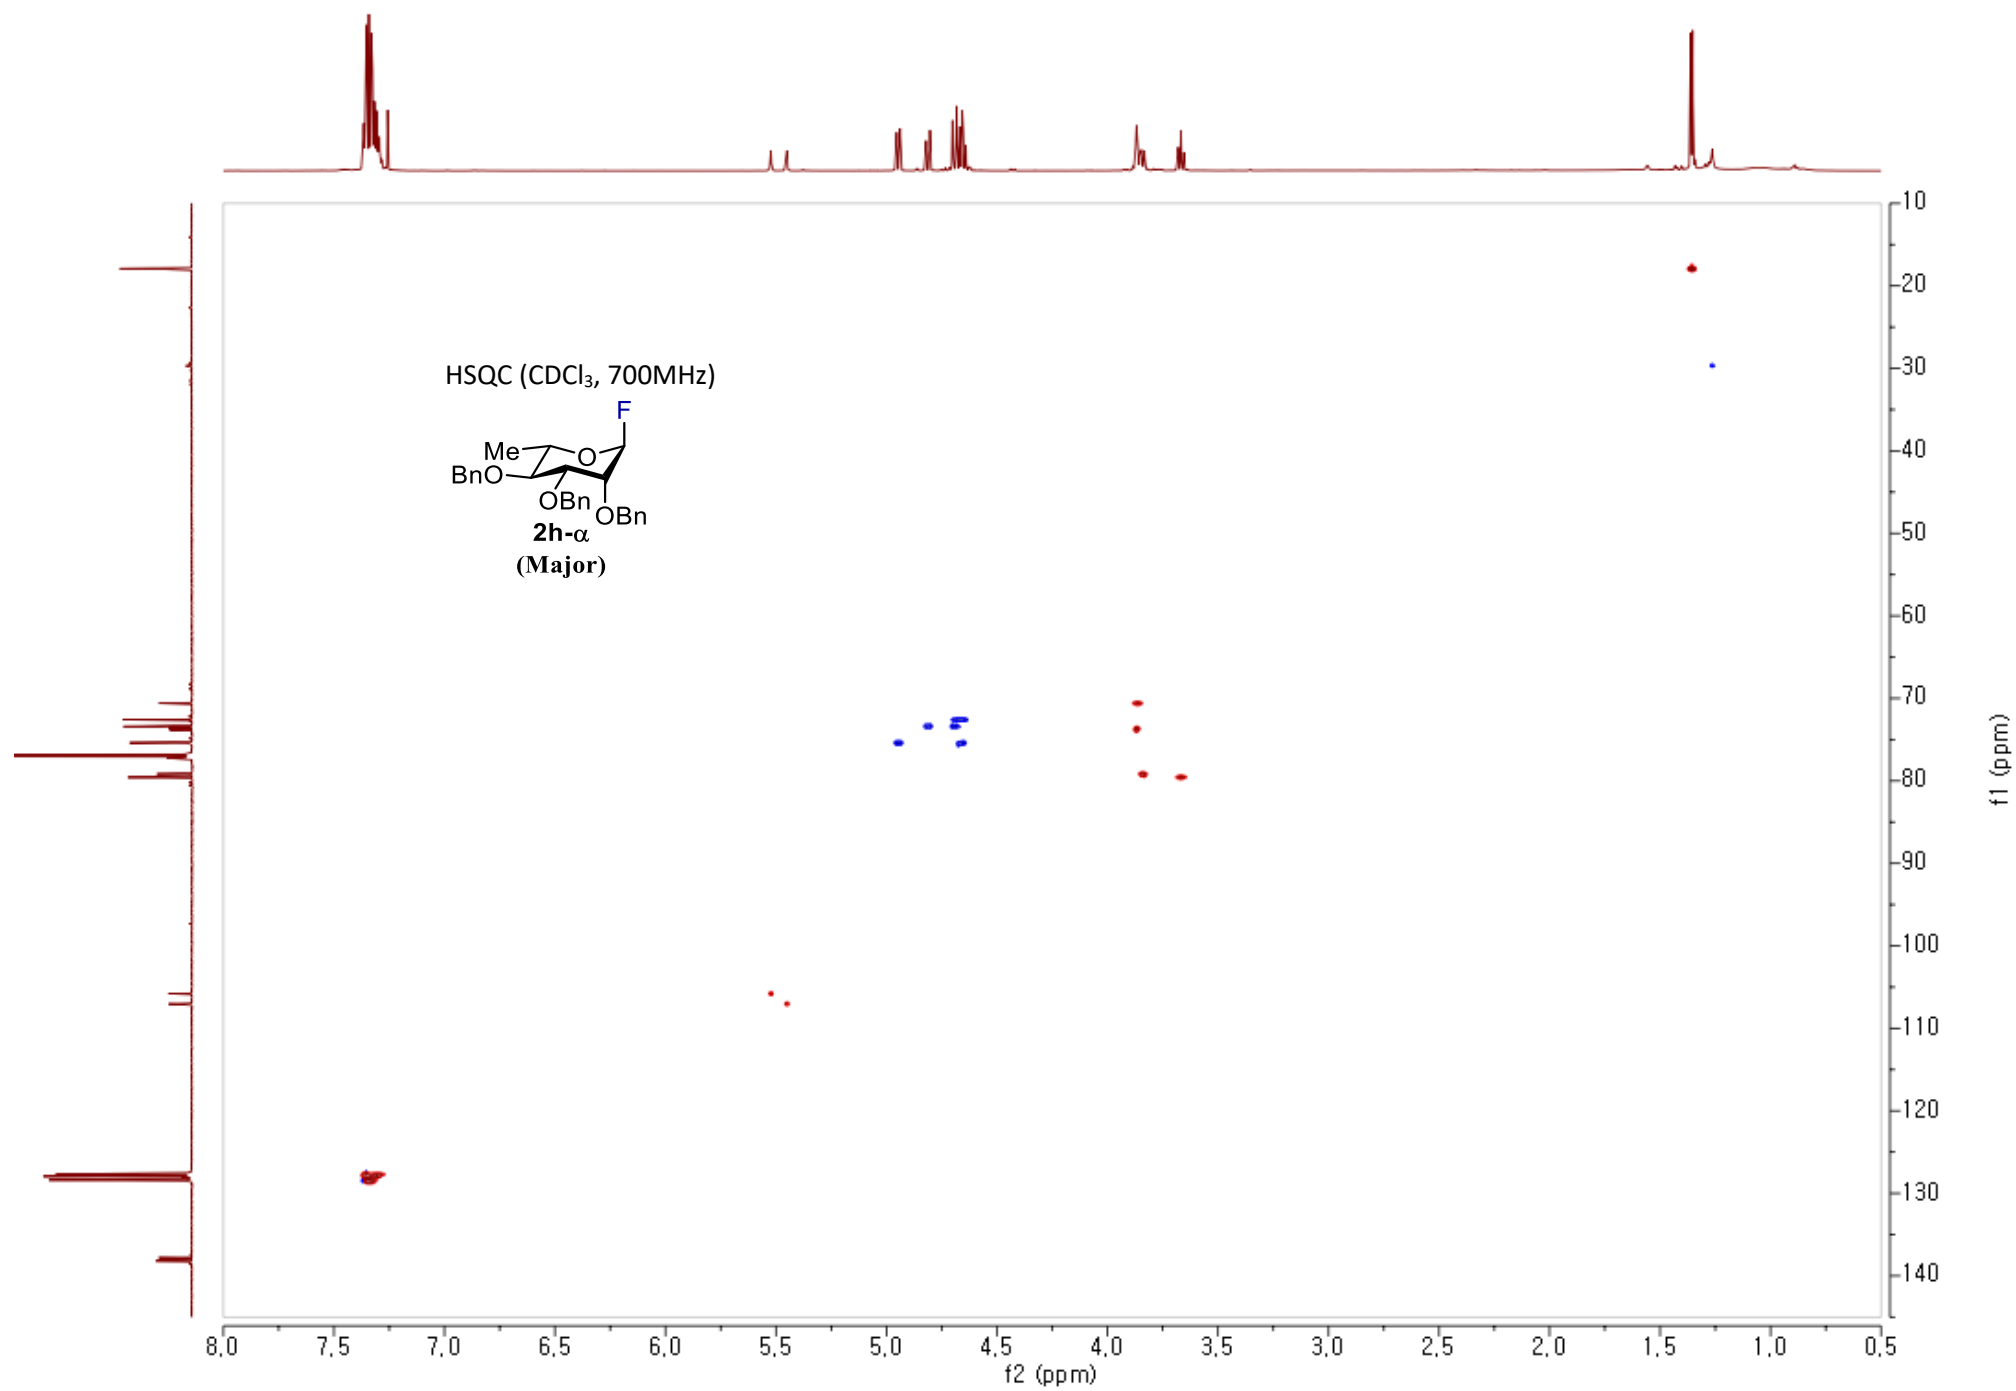

$^{19}\text{F}$  NMR ( $\text{CDCl}_3$ , 376MHz)

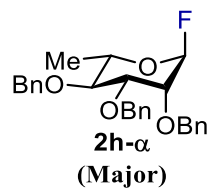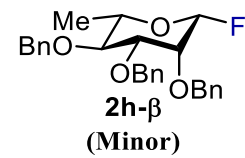

— -137.01  
— -137.14

— -143.28  
— -143.29  
— -143.41  
— -143.42

5.07

1.00

-134.0 -135.0 -136.0 -137.0 -138.0 -139.0 -140.0 -141.0 -142.0 -143.0 -144.0 -145.0 -14

f1 (ppm)

127

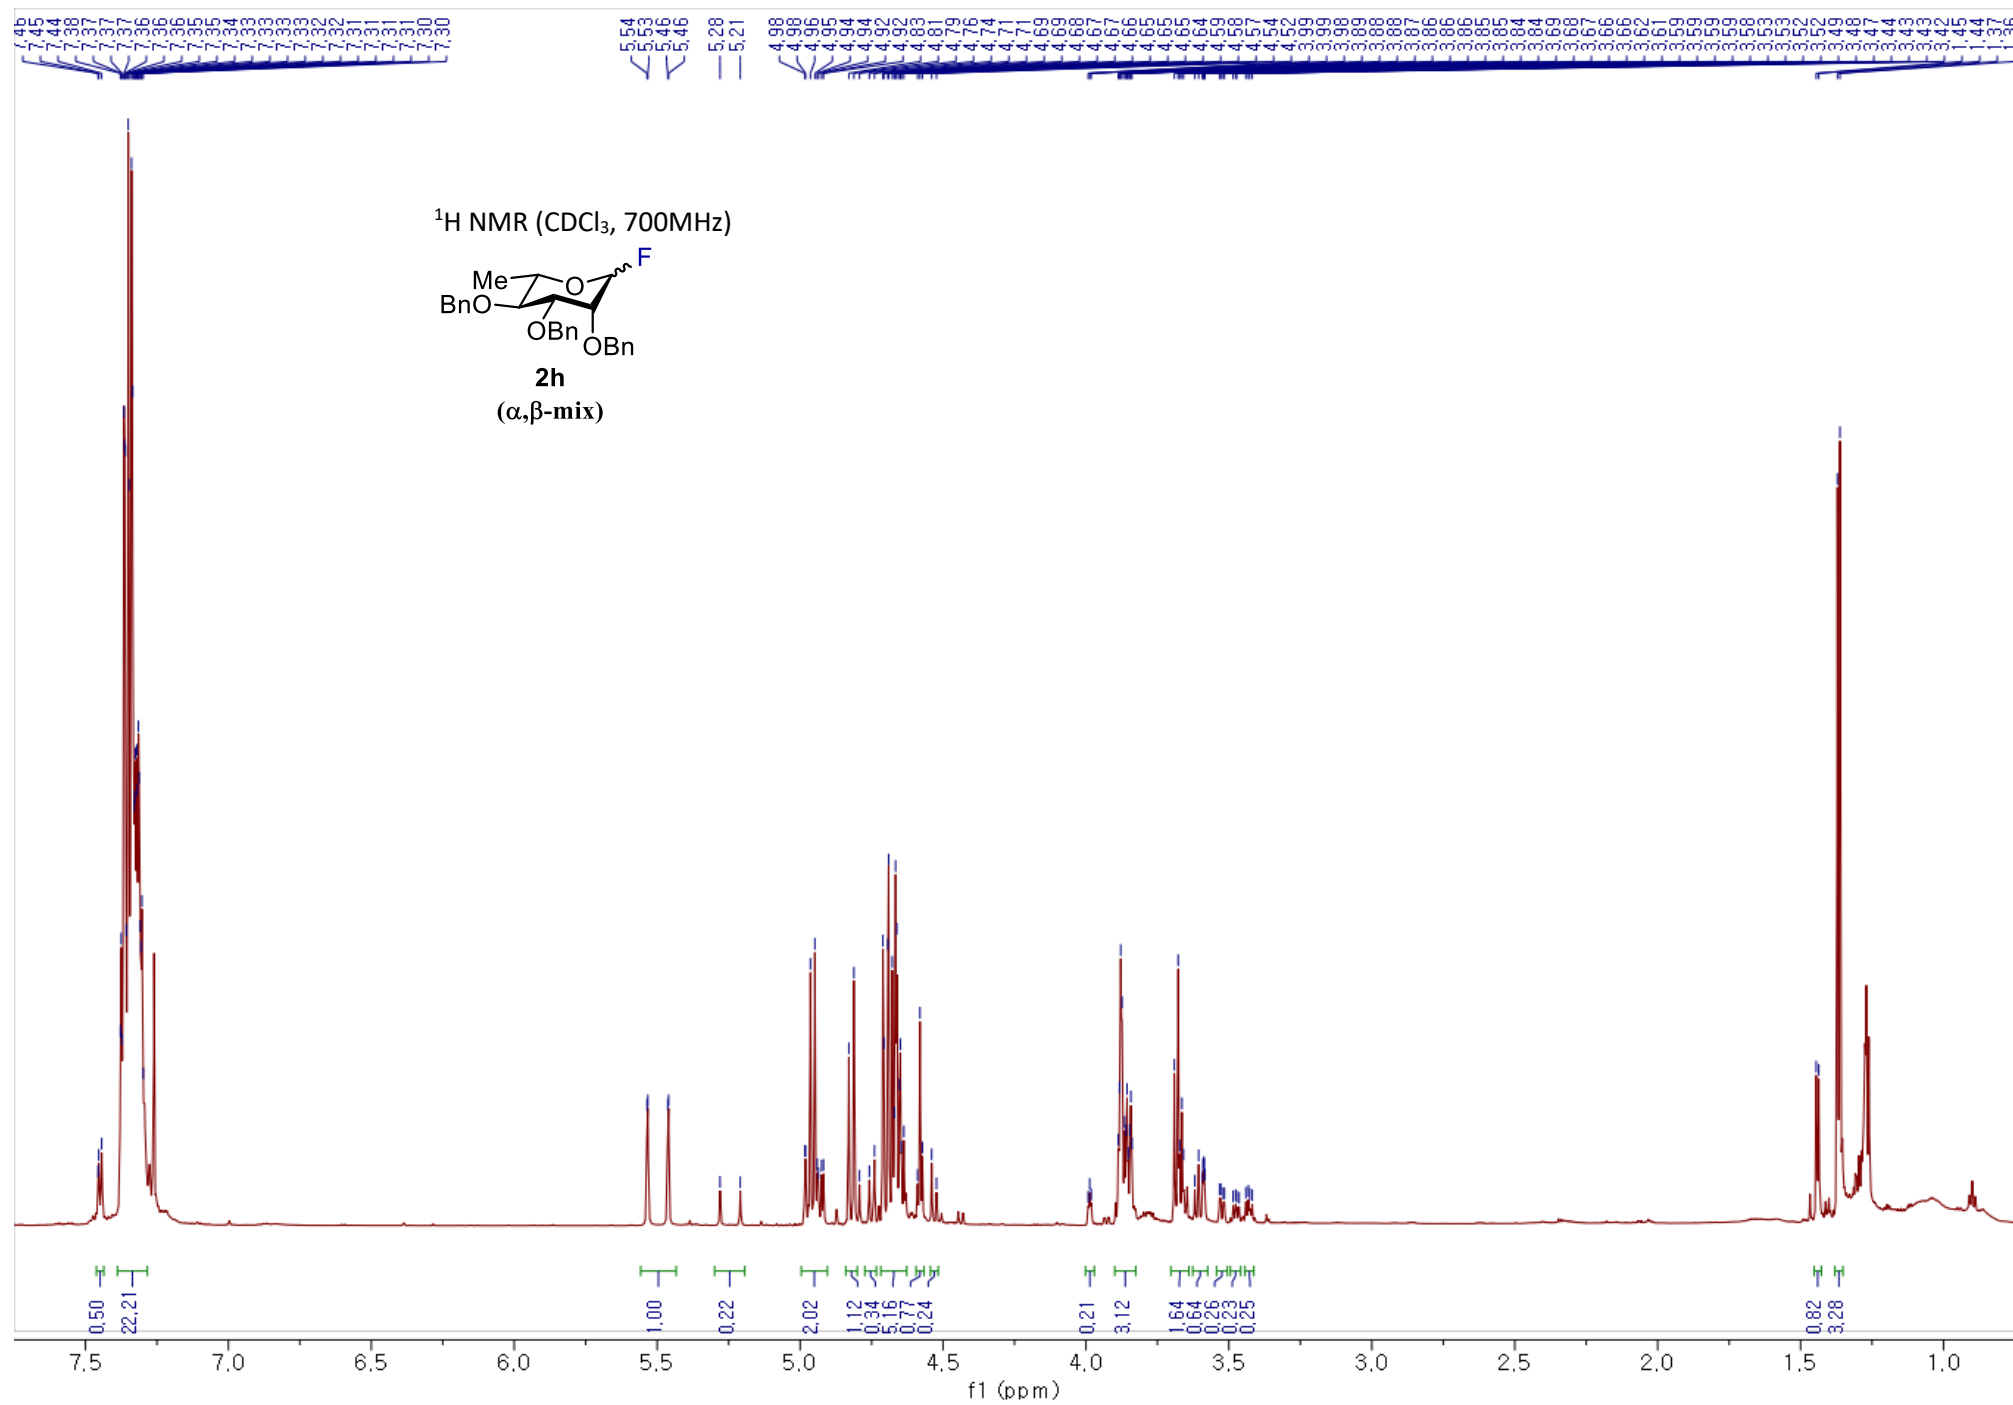

2,3,4-Tris-O-(phenylmethyl)- $\beta$ -L-fucopyranosyl fluoride (2i- $\beta$ , Major diastereomer)

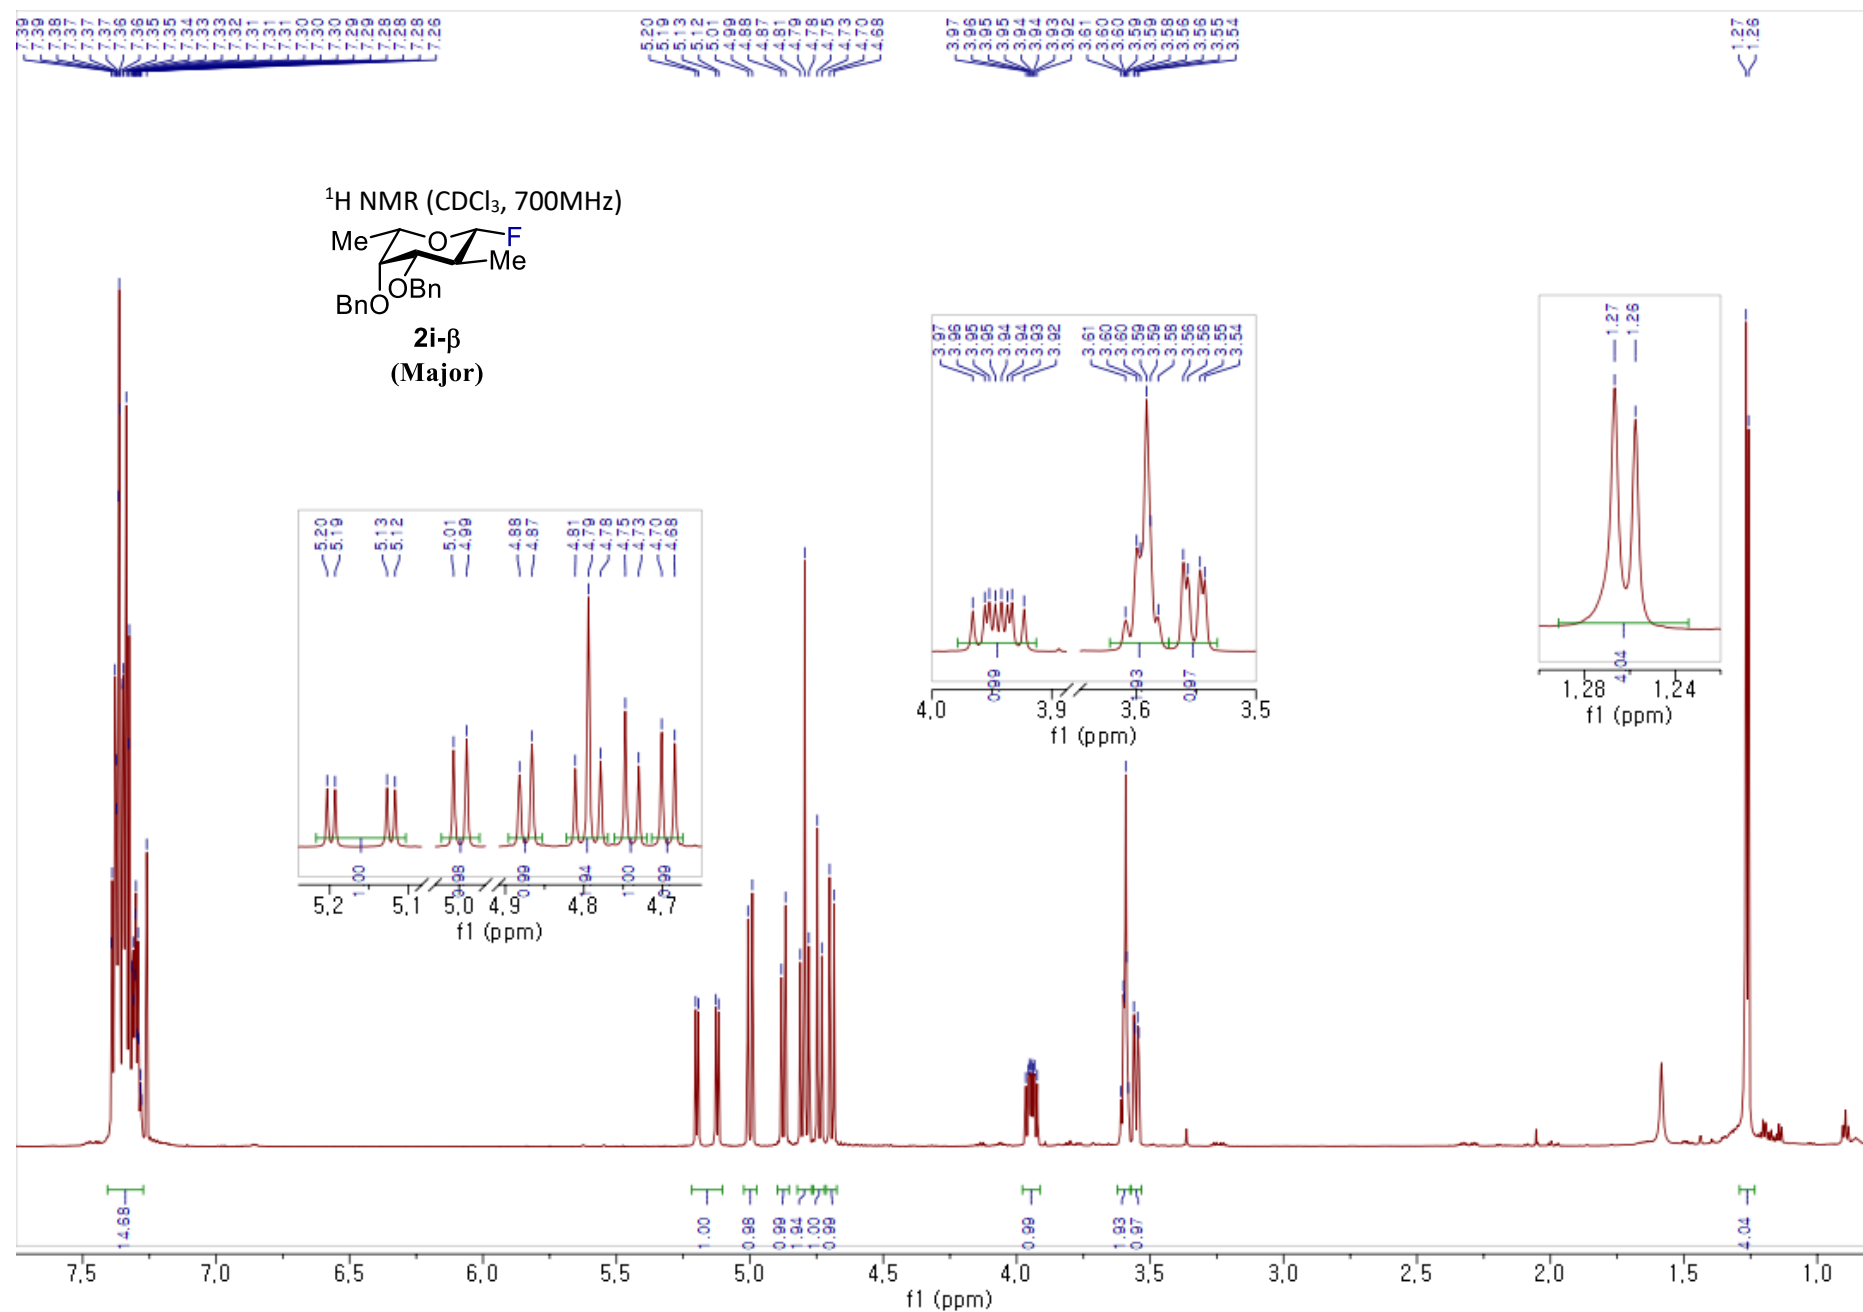

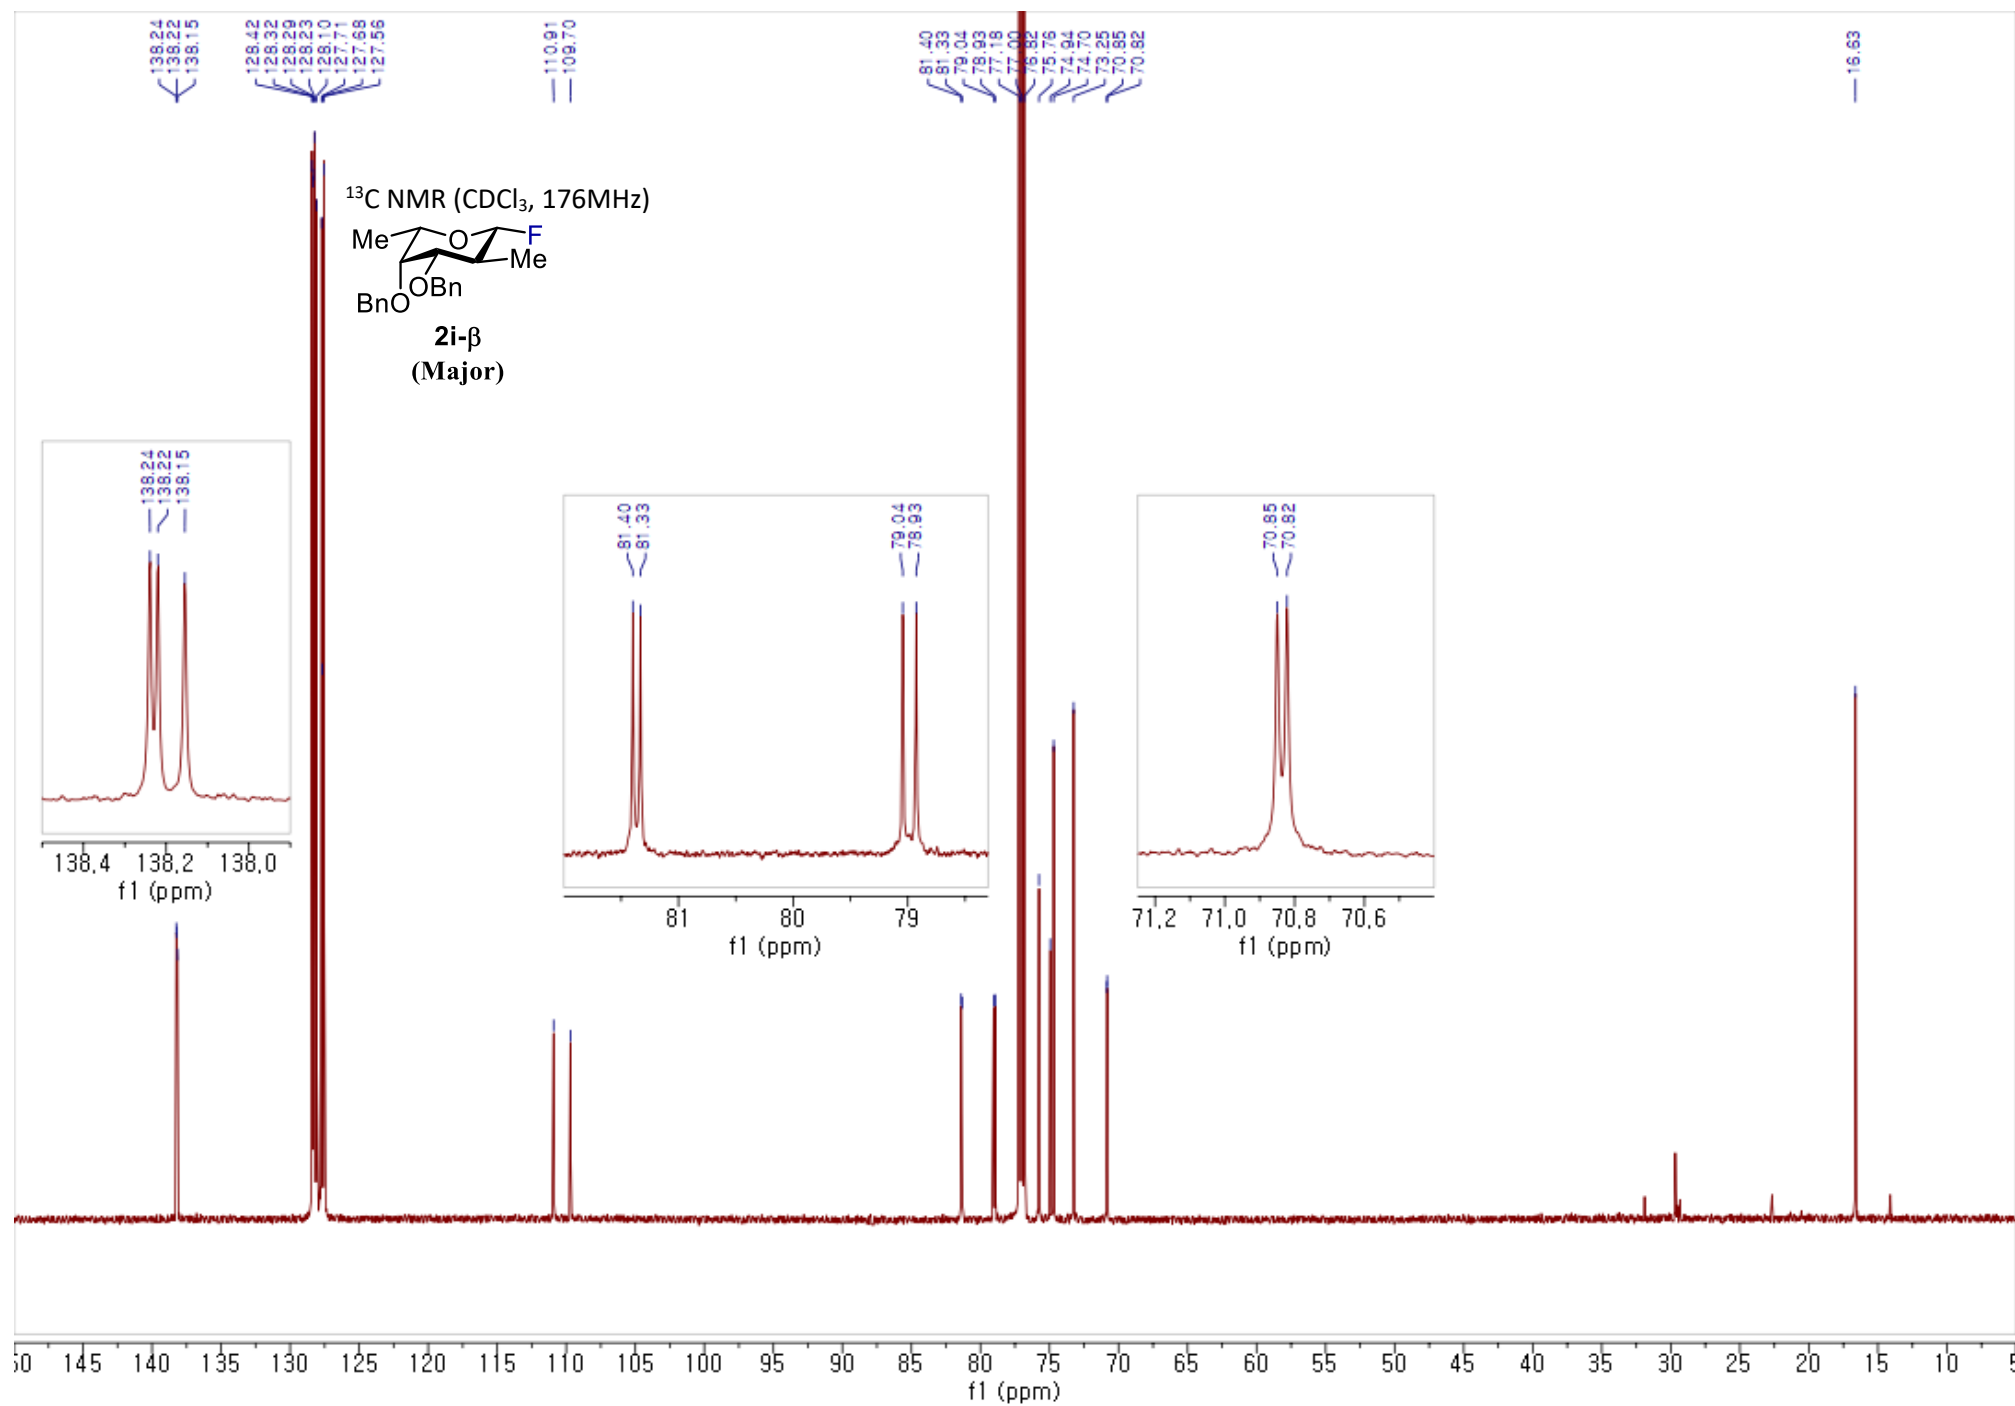

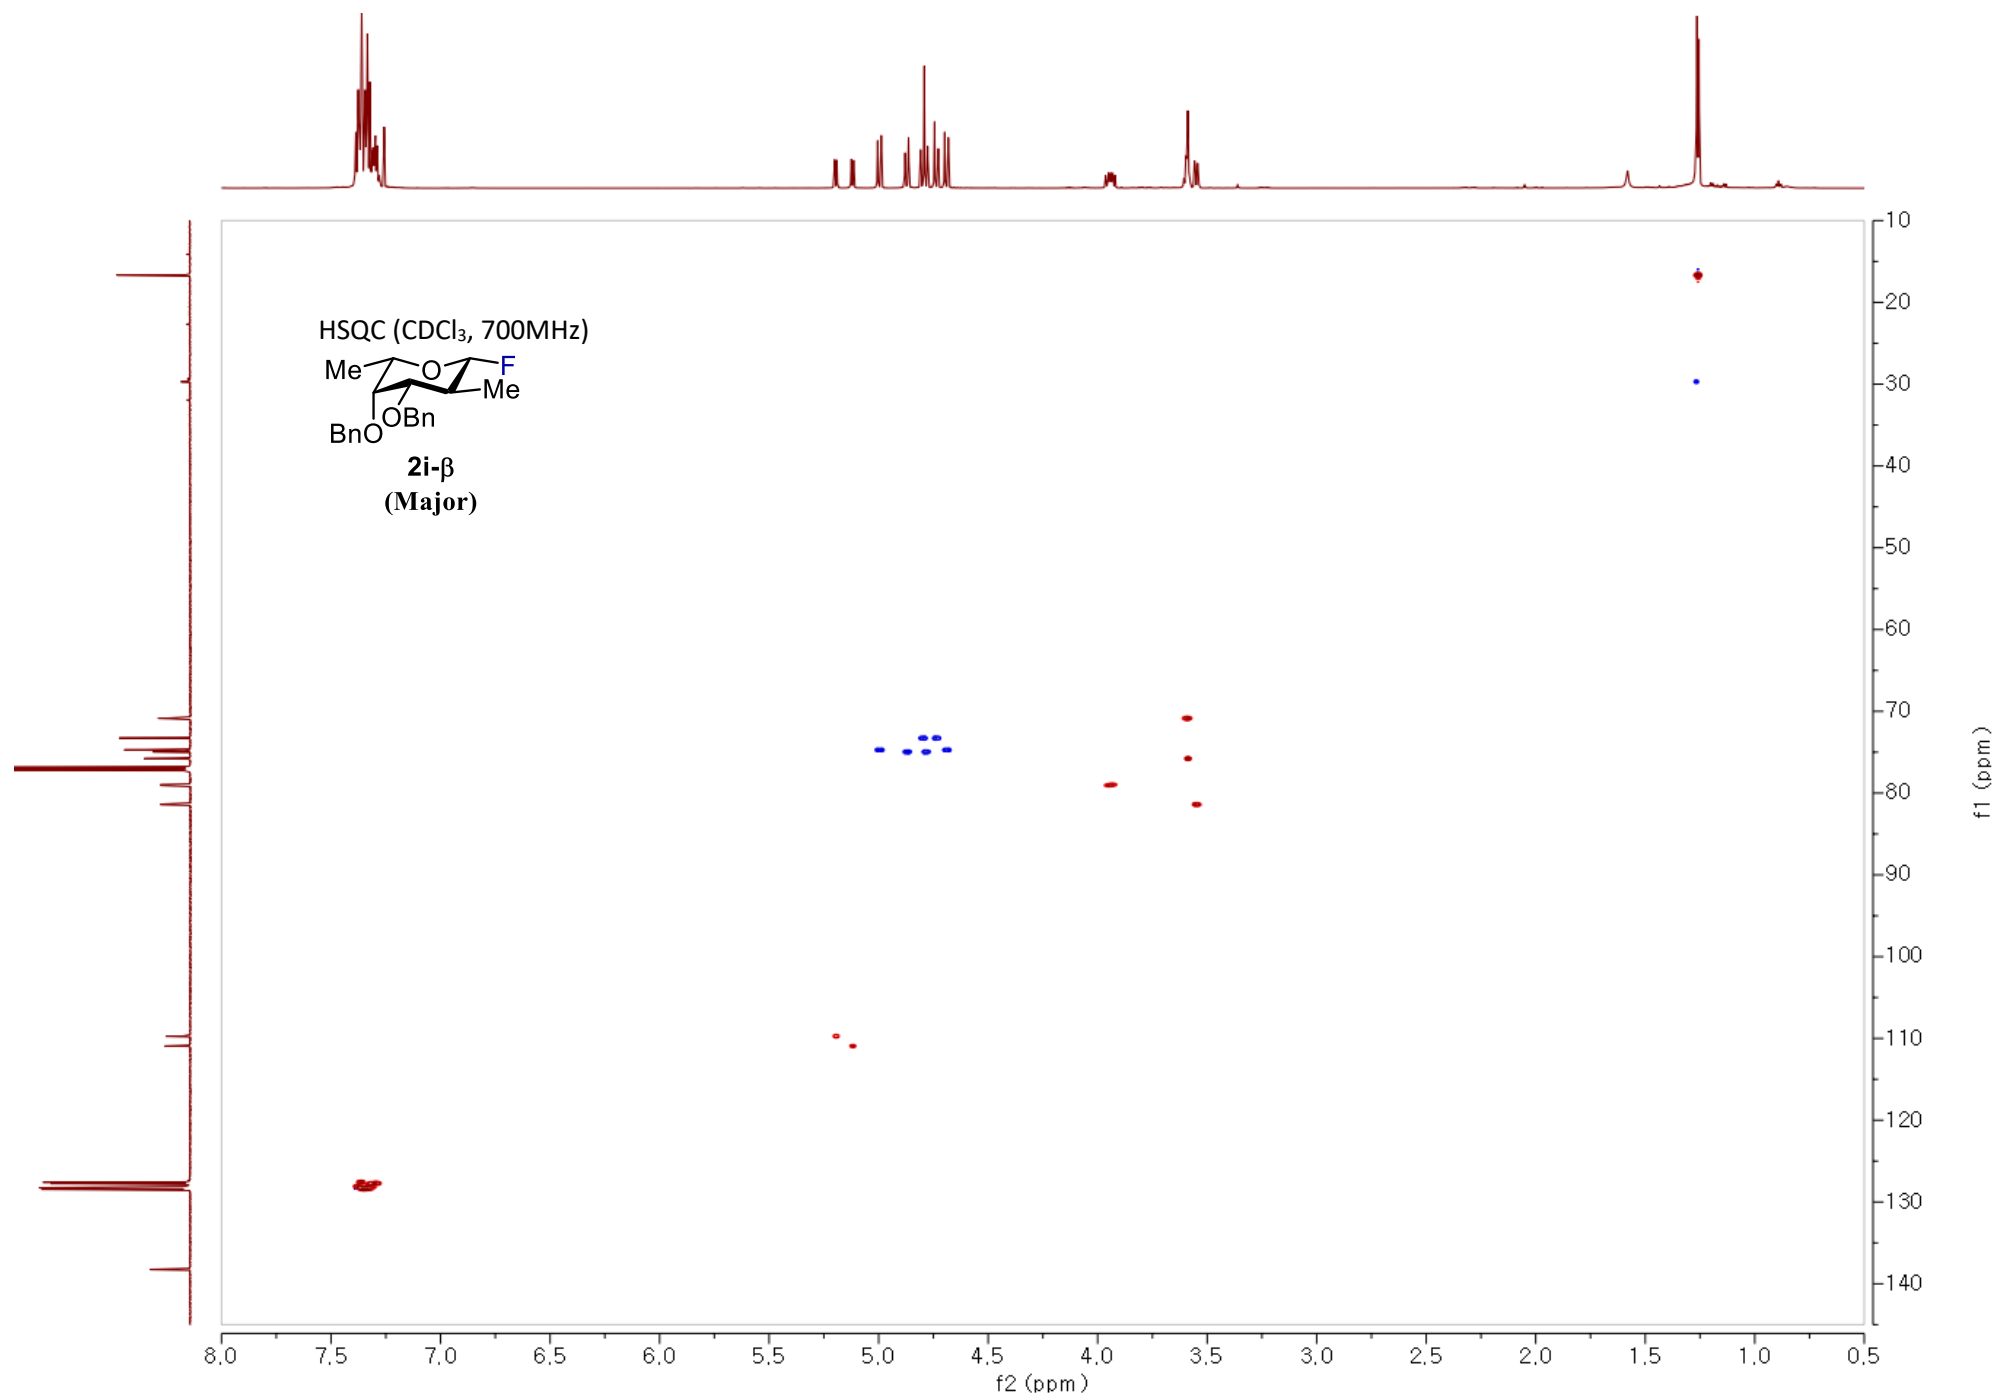

**2,3,4-Tris-*O*-(phenylmethyl)- $\alpha$ -L-fucopyranosyl fluoride (2i- $\alpha$ , Minor diastereomer)**

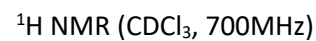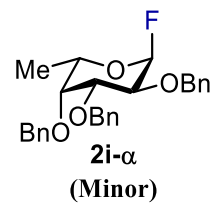

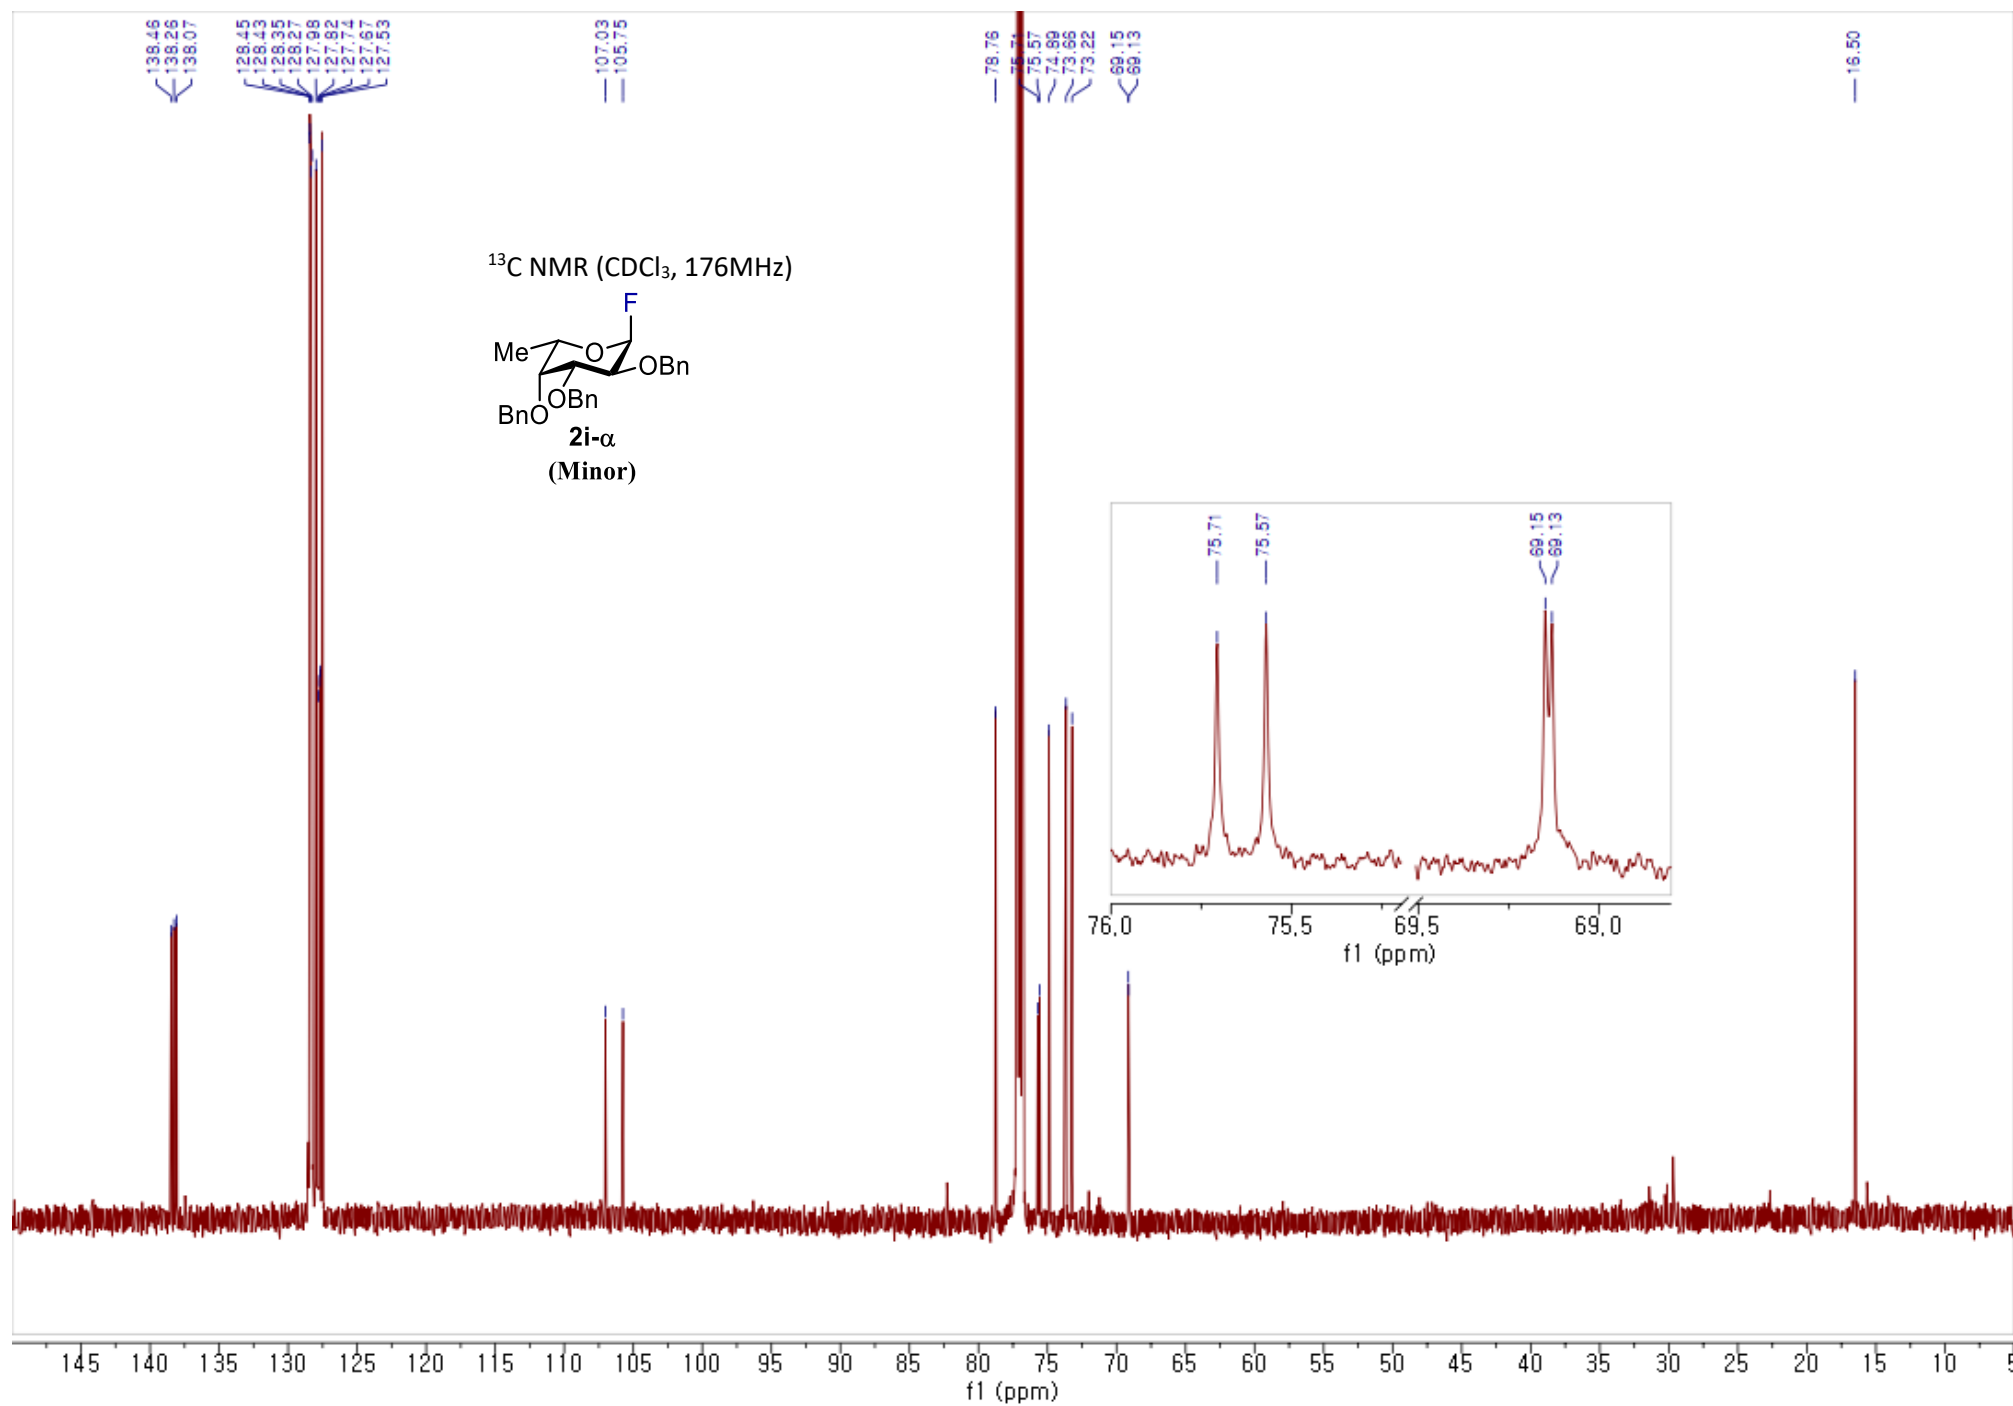

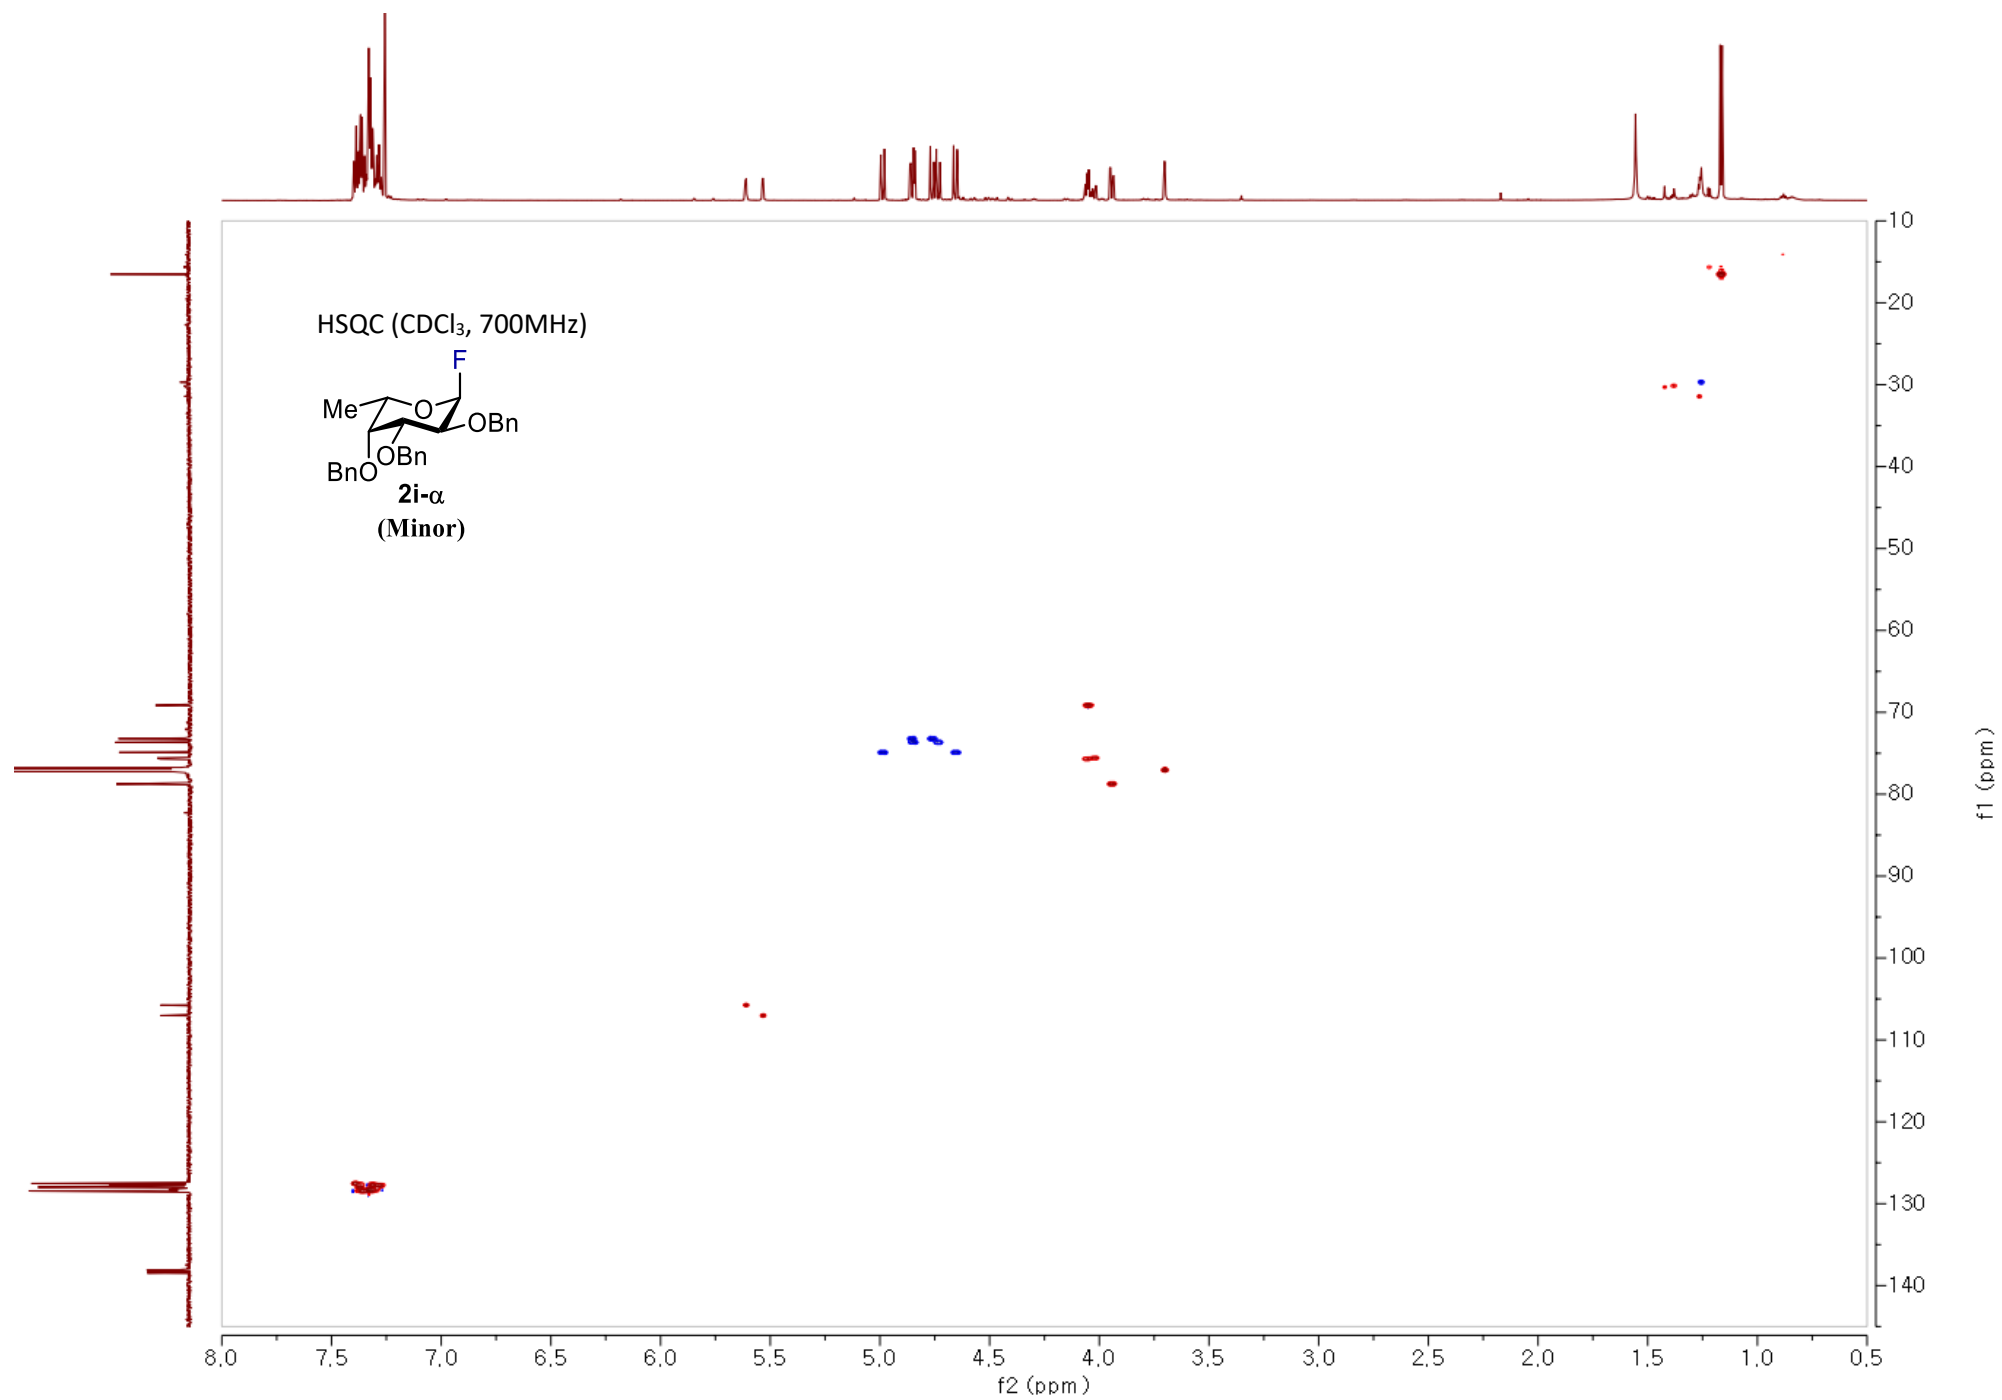

$^{19}\text{F}$  NMR ( $\text{CDCl}_3$ , 471MHz)

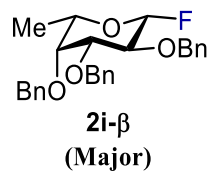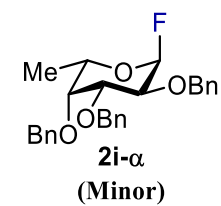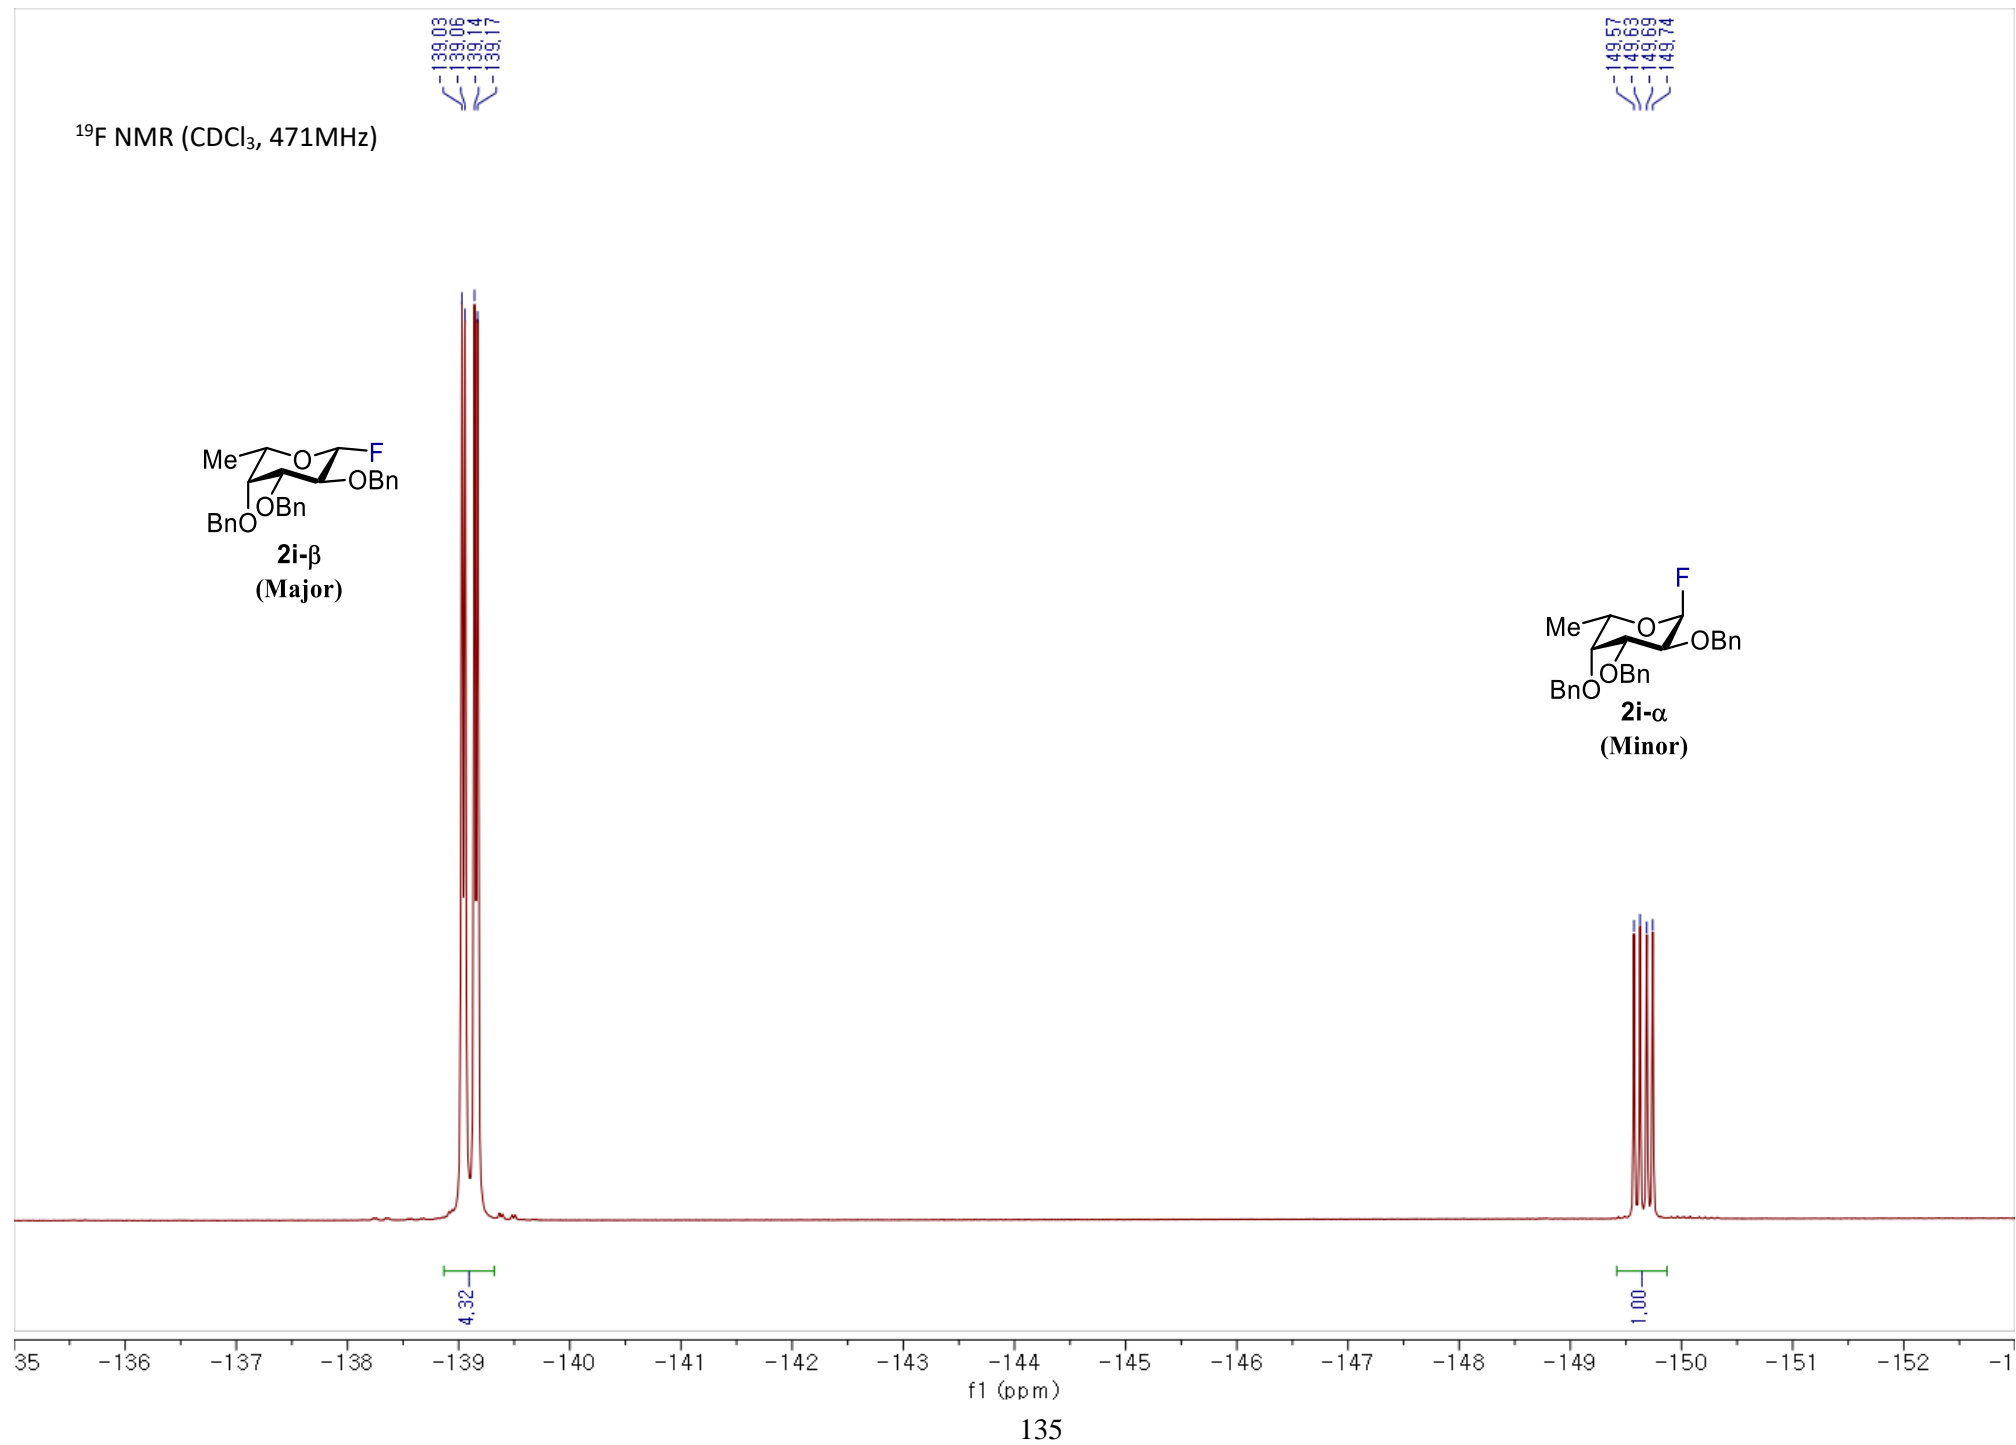

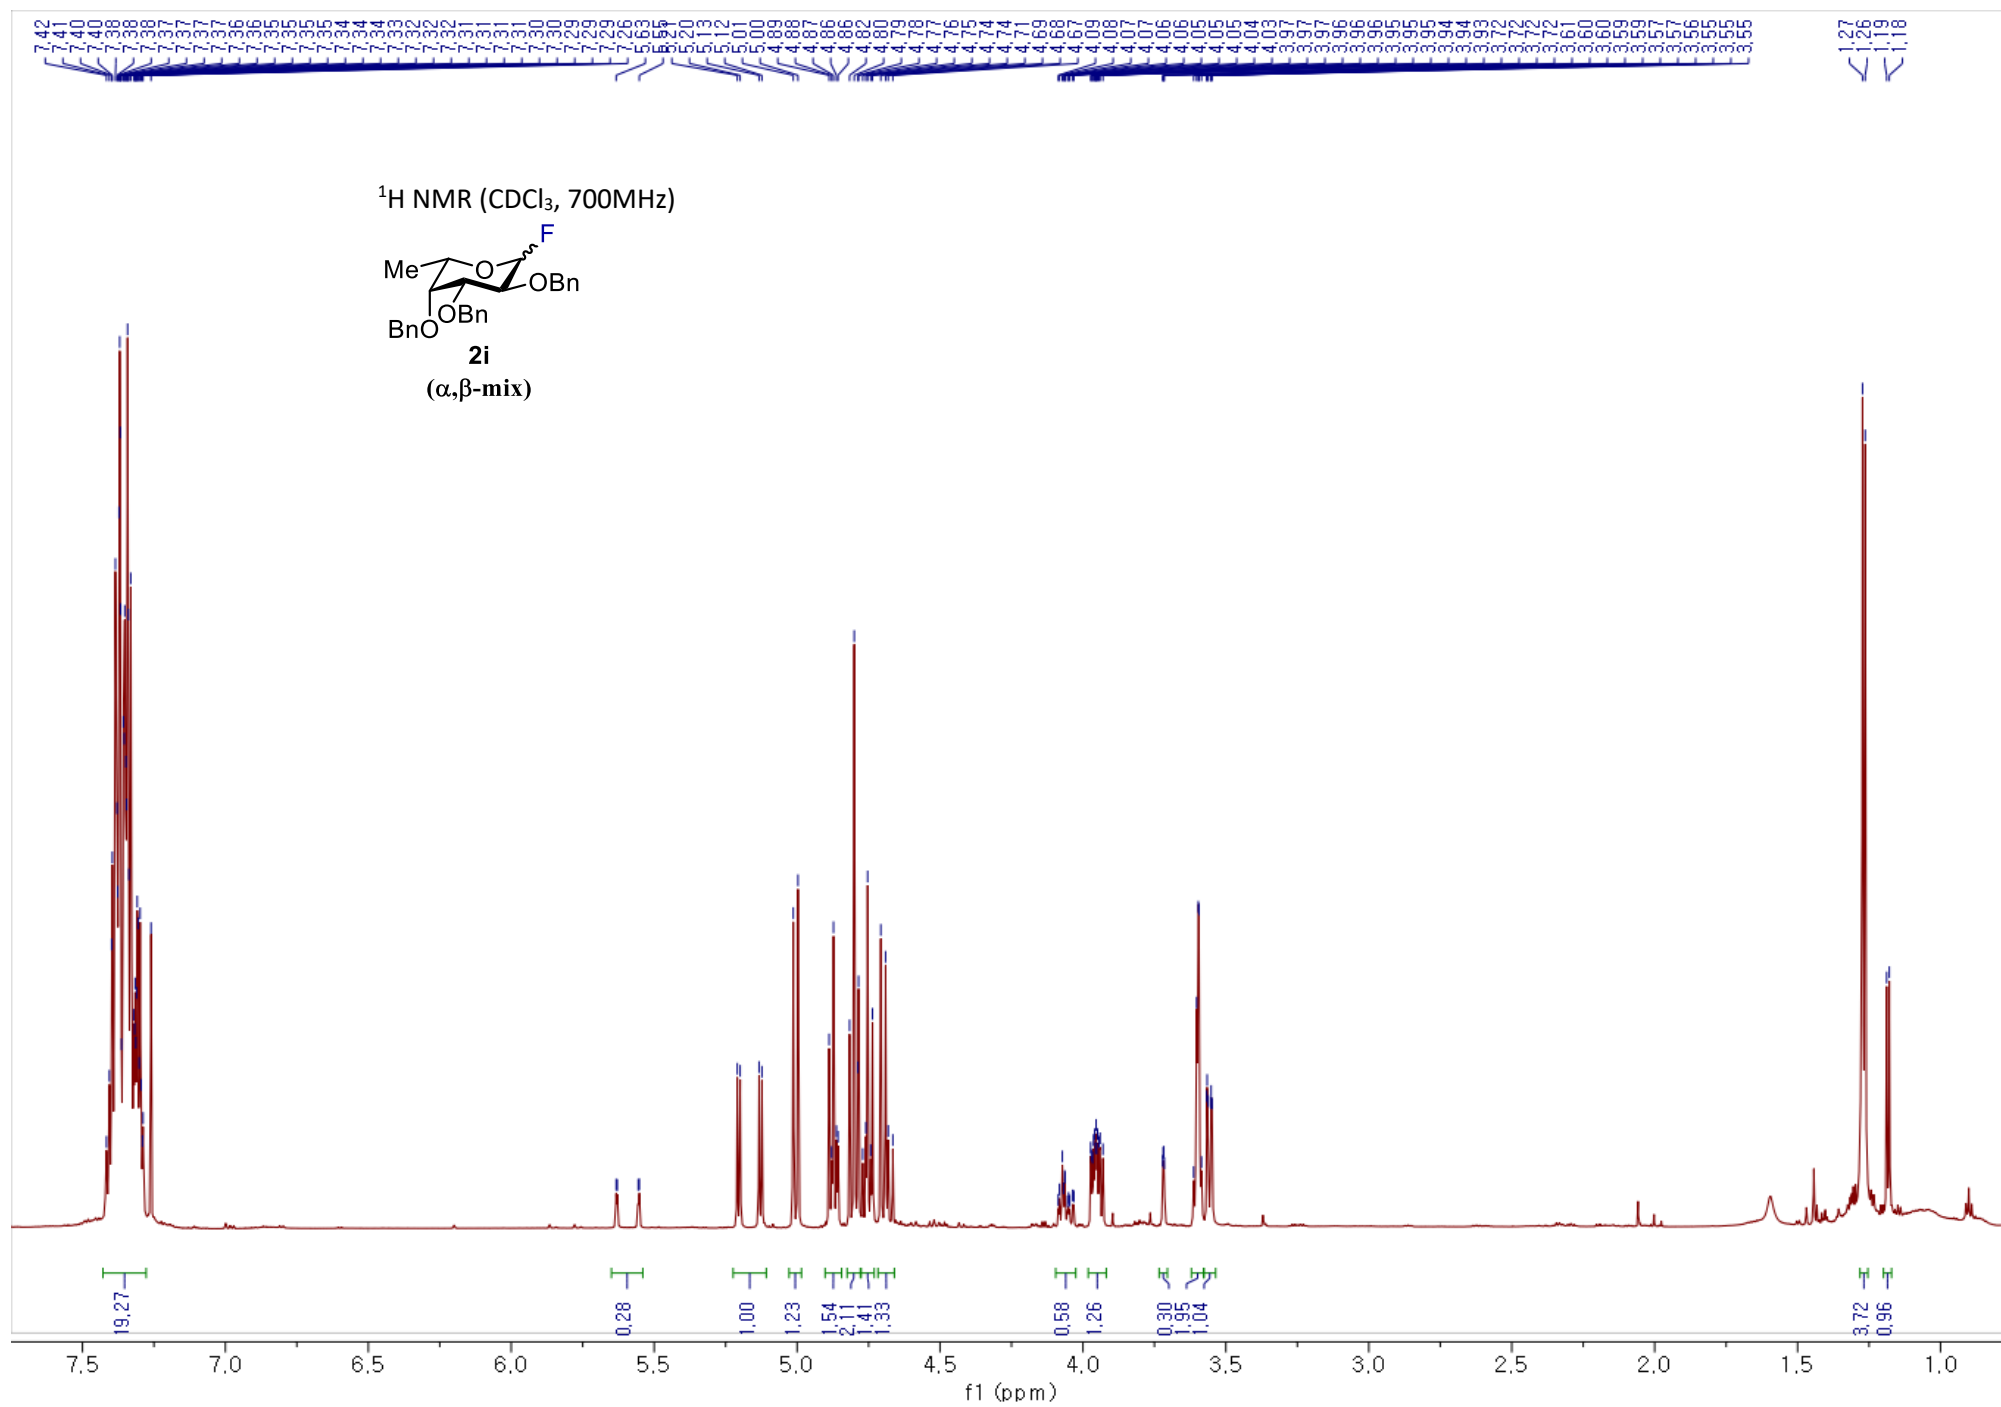

2,3,4-tris-O-(phenylmethyl)-D-xylopyranosyl fluoride (2j, Isolated as  $\alpha : \beta = 1 : 4.3$  mixture)

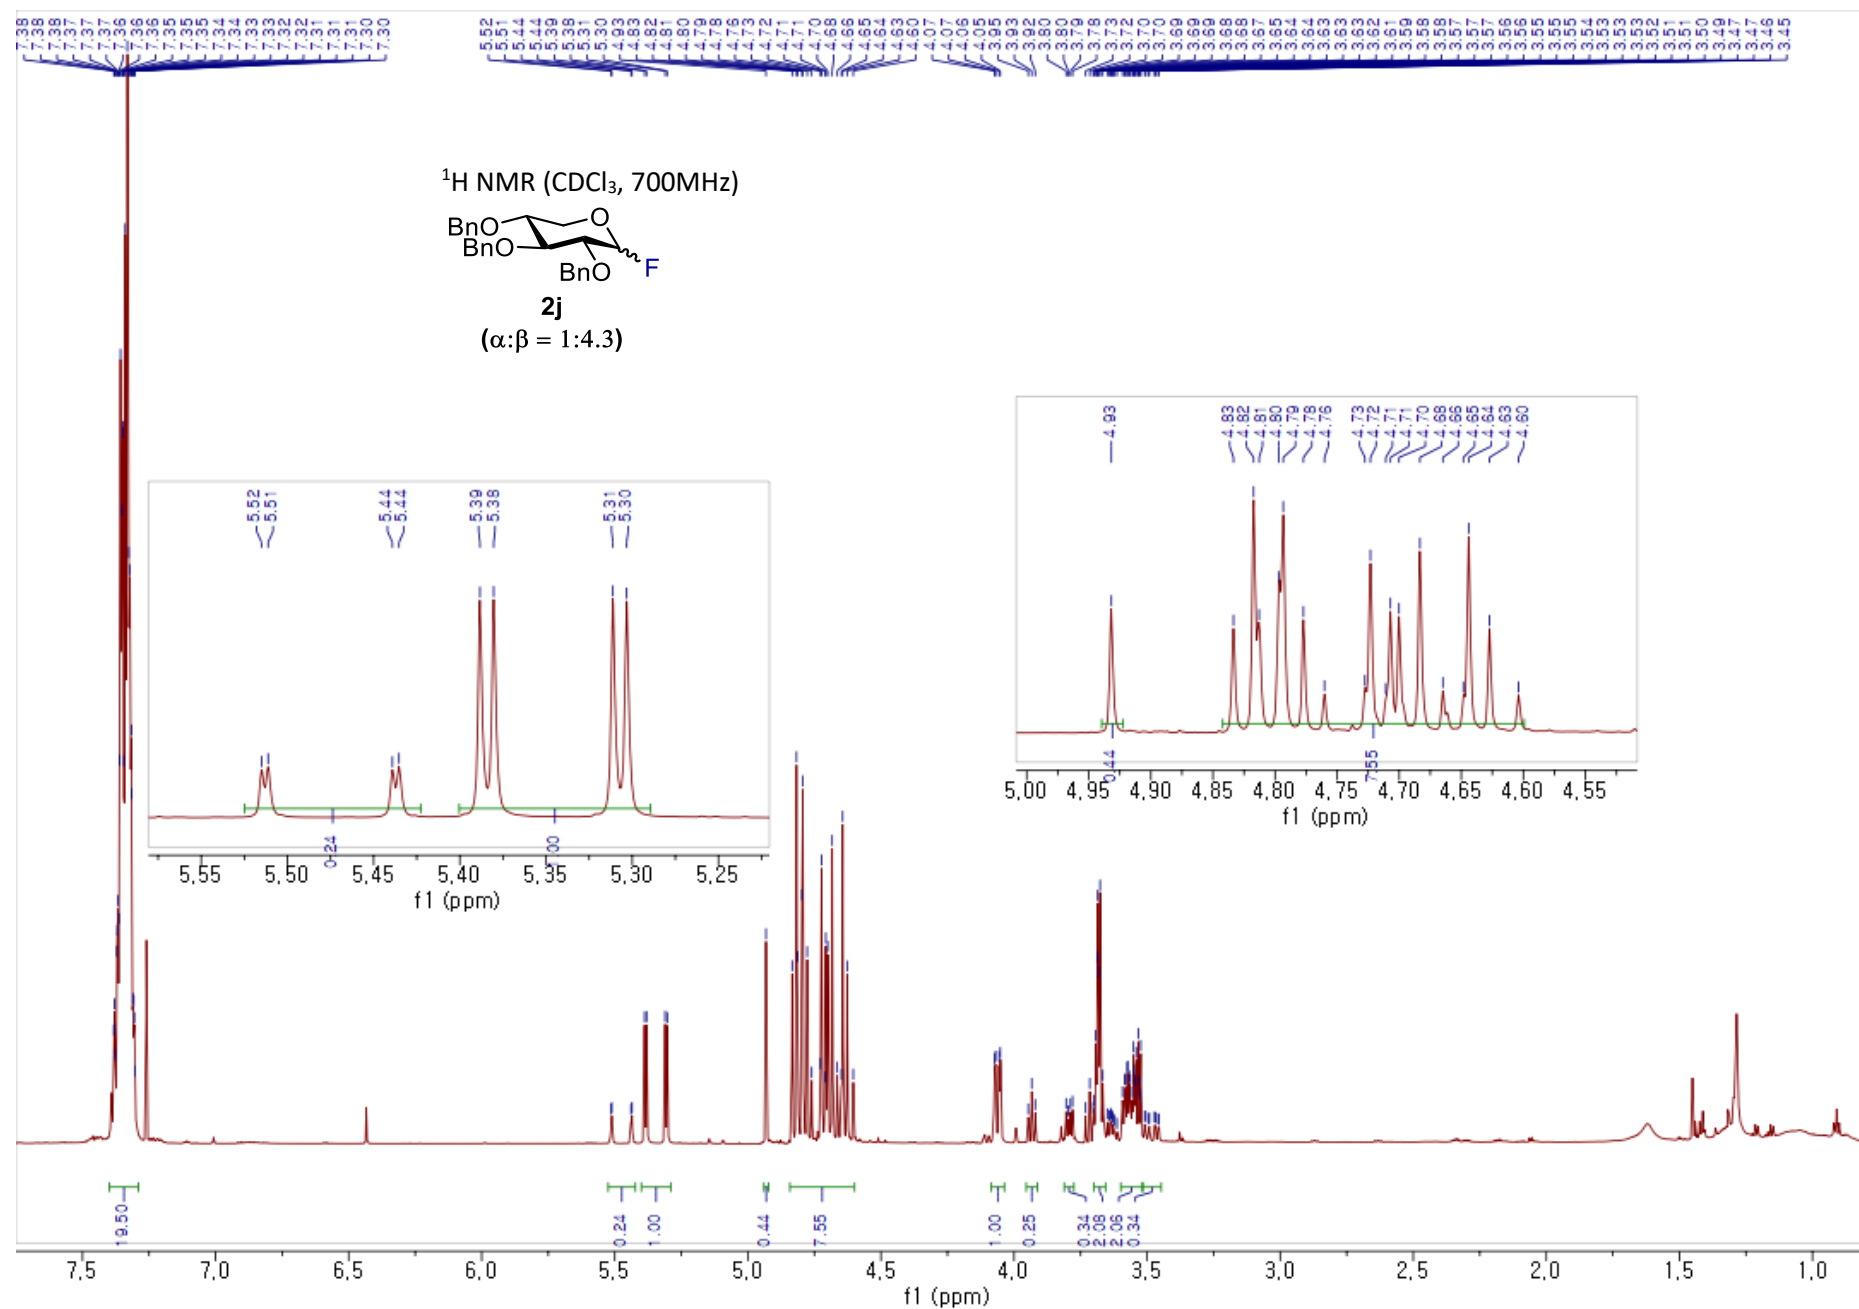

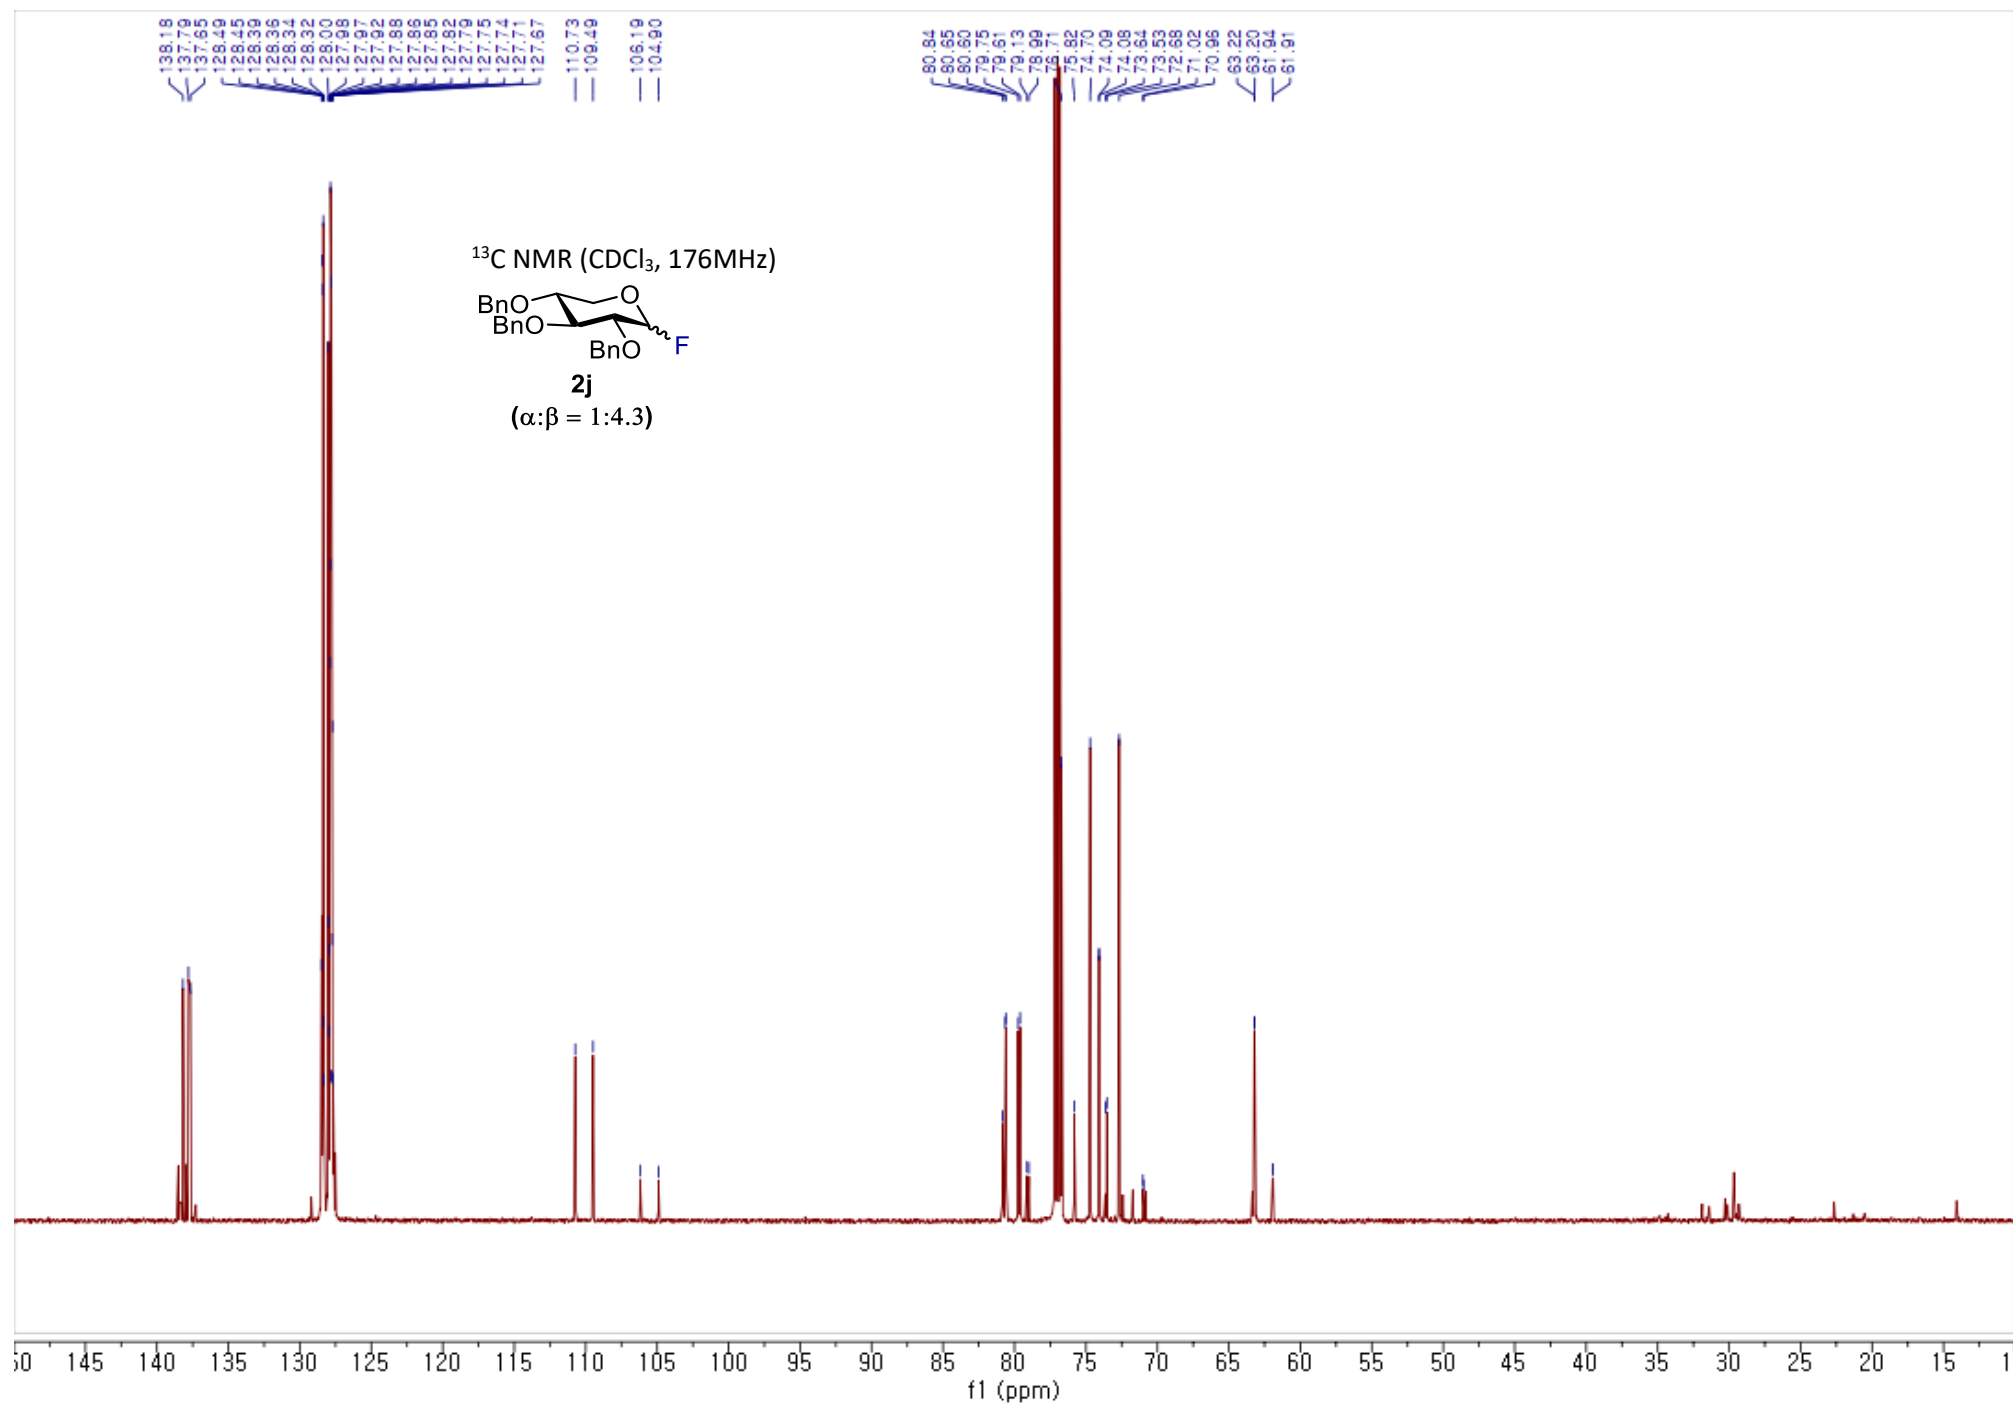

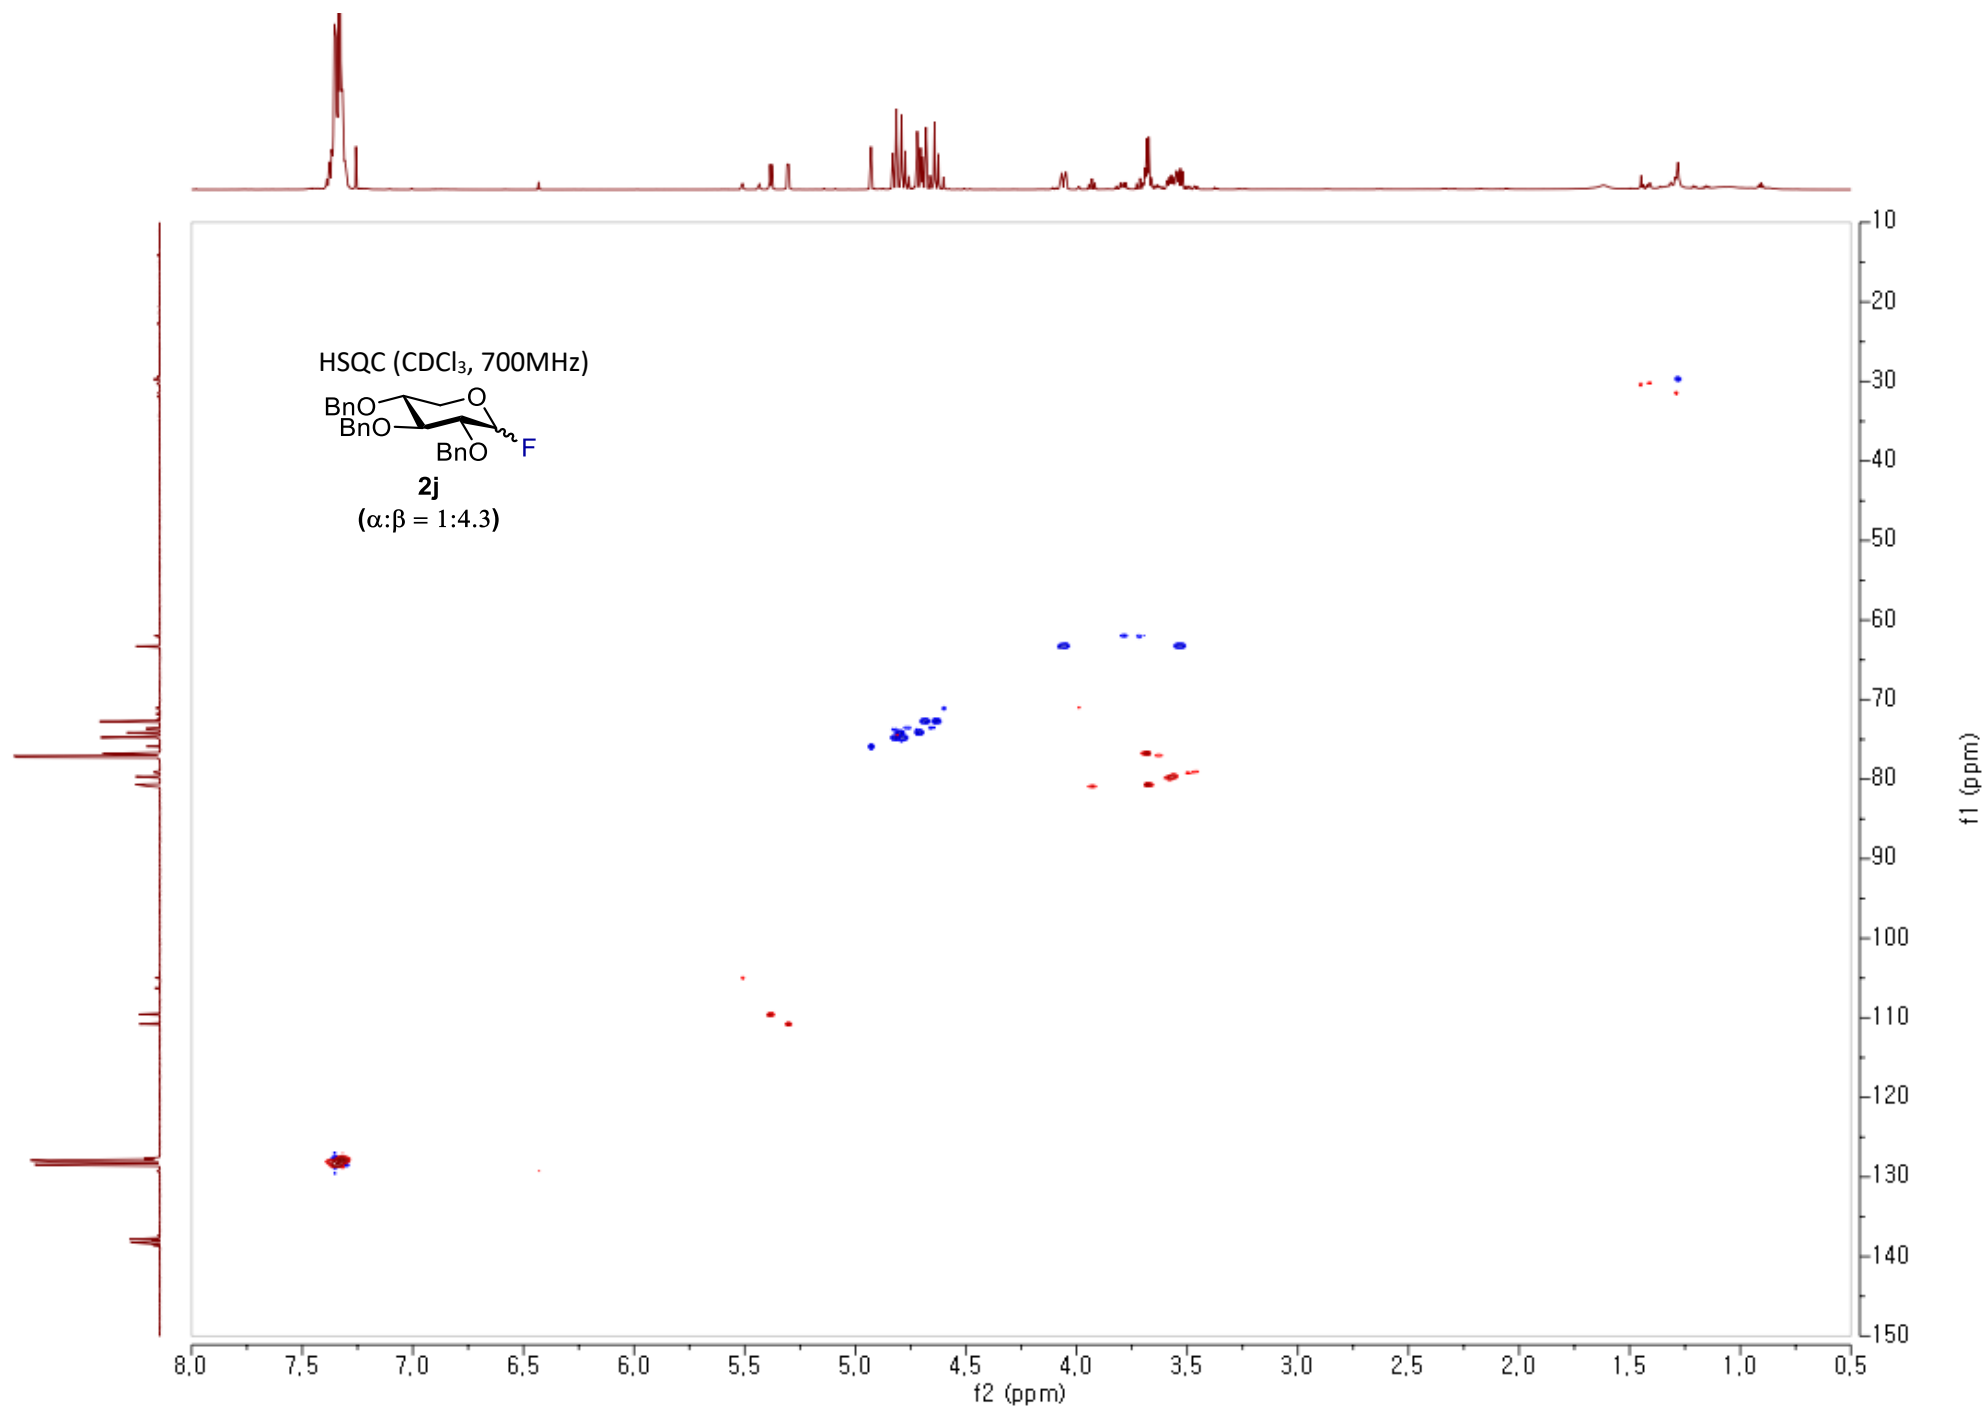

2,3,5-Tris-O-(phenylmethyl)- $\beta$ -D-ribofuranosyl fluoride (2k-  $\beta$ , Major diastereomer)

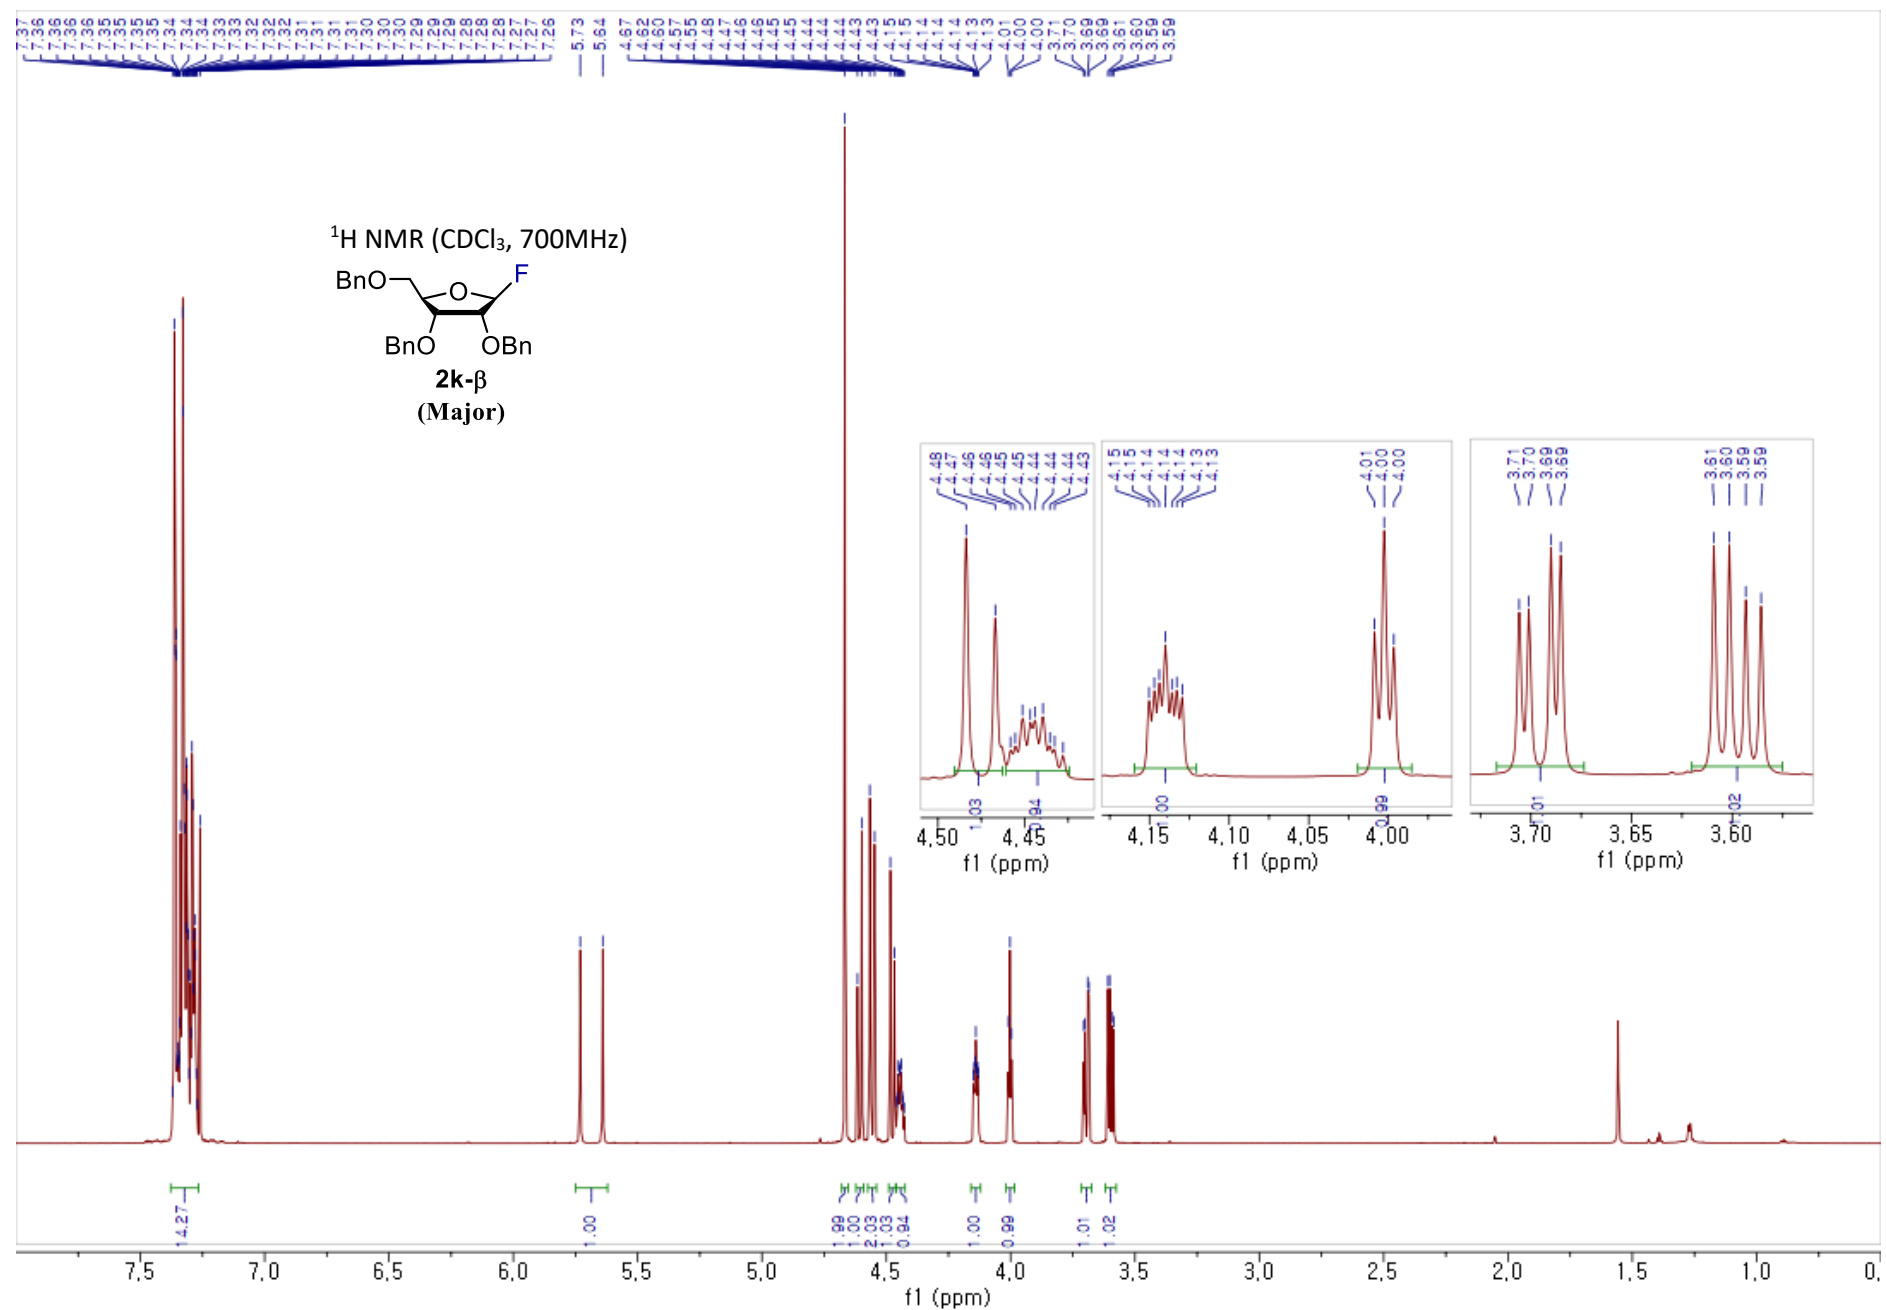

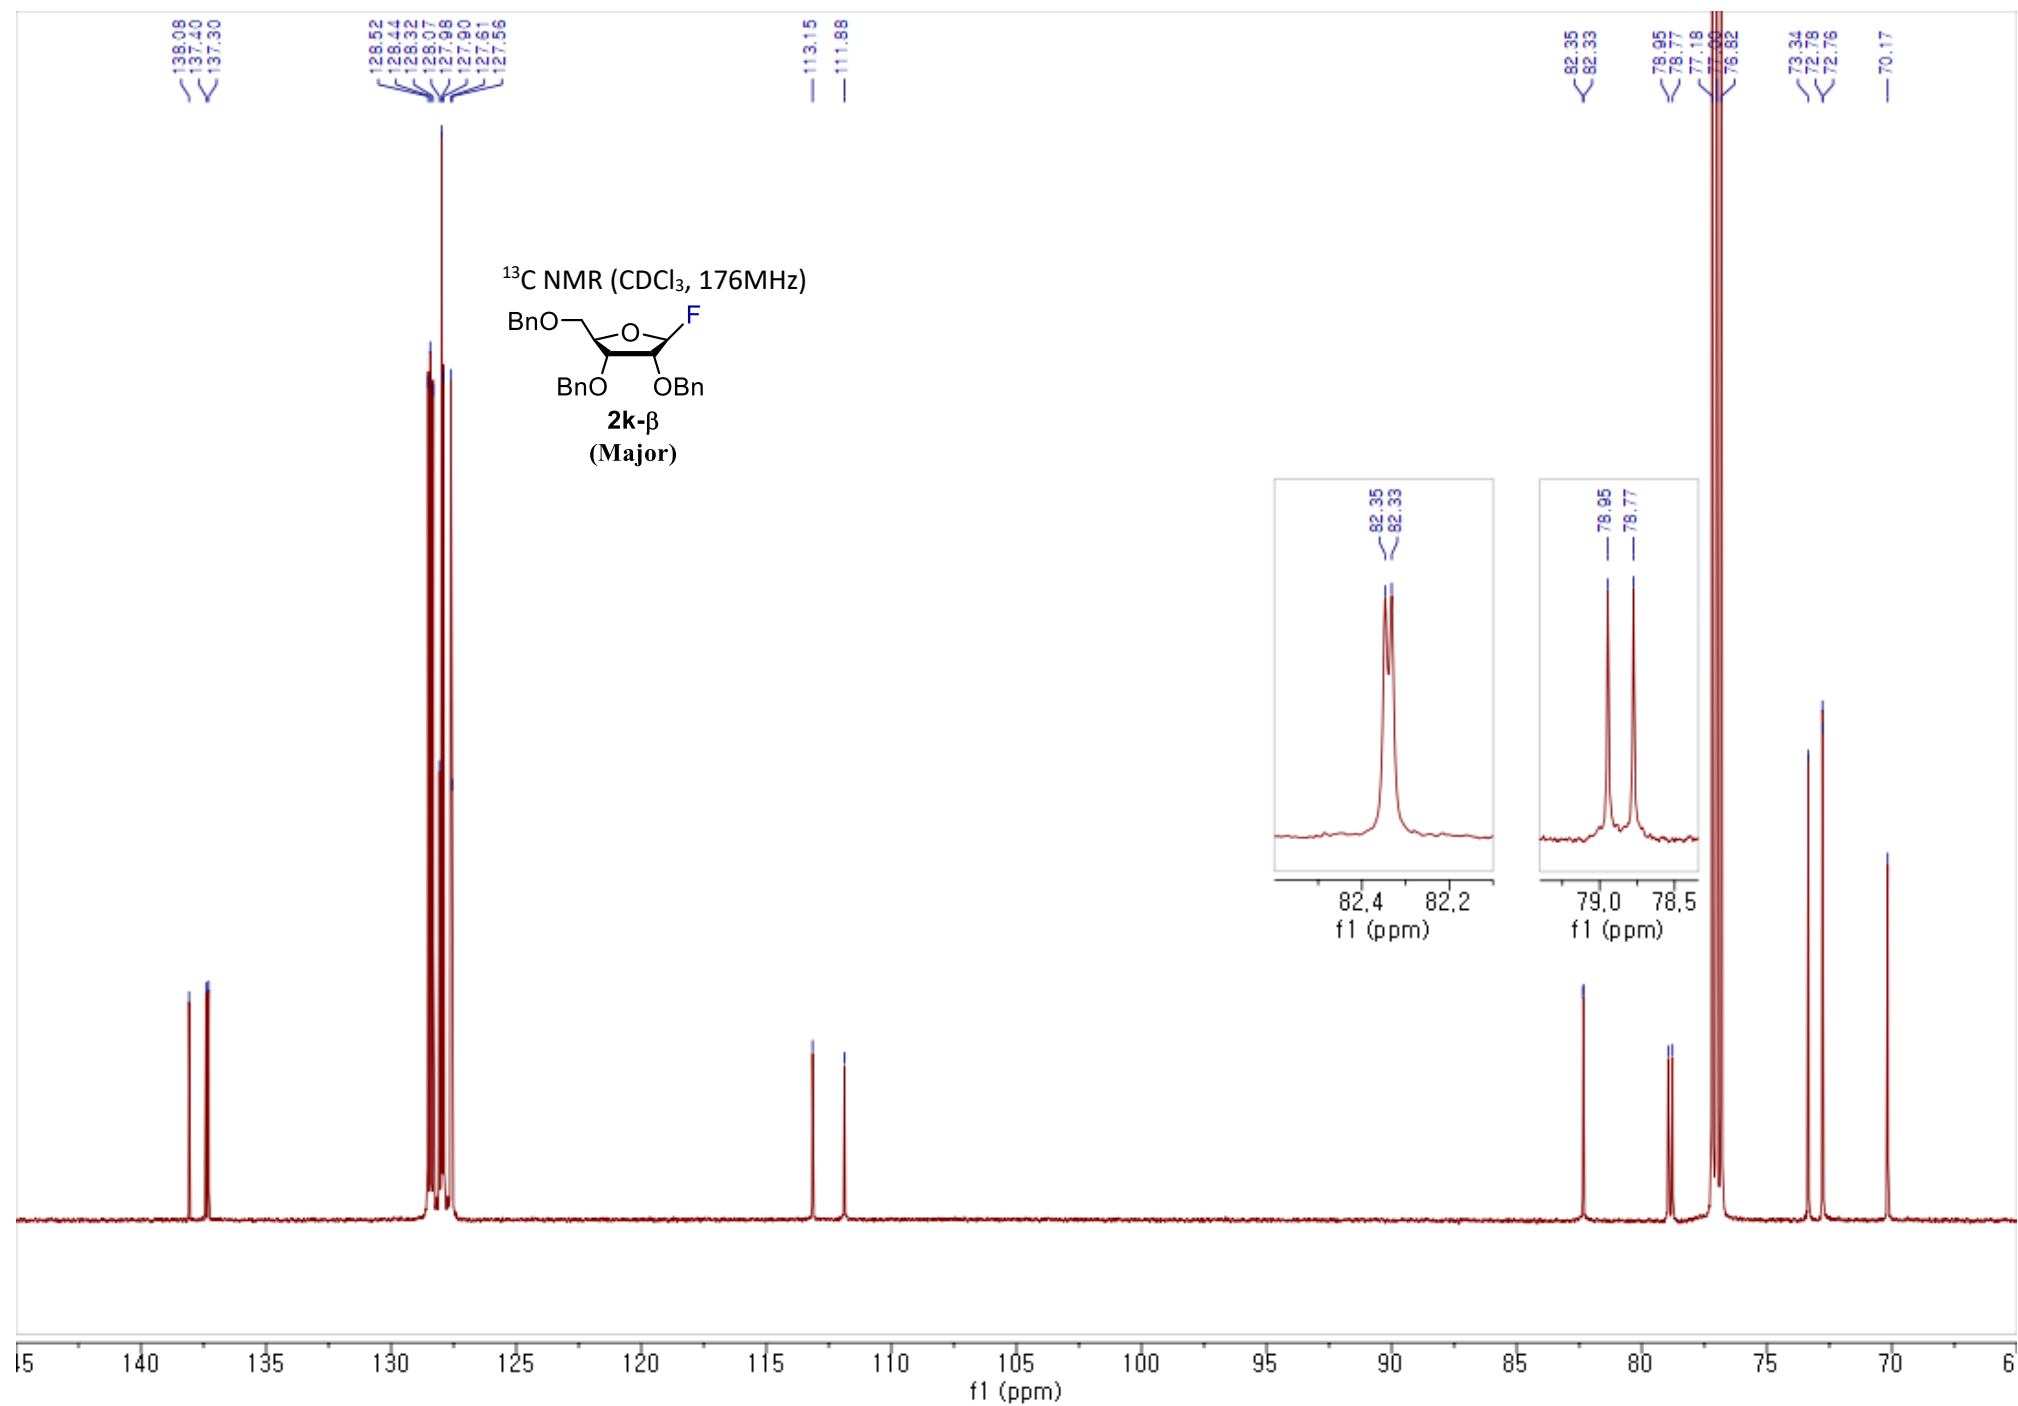

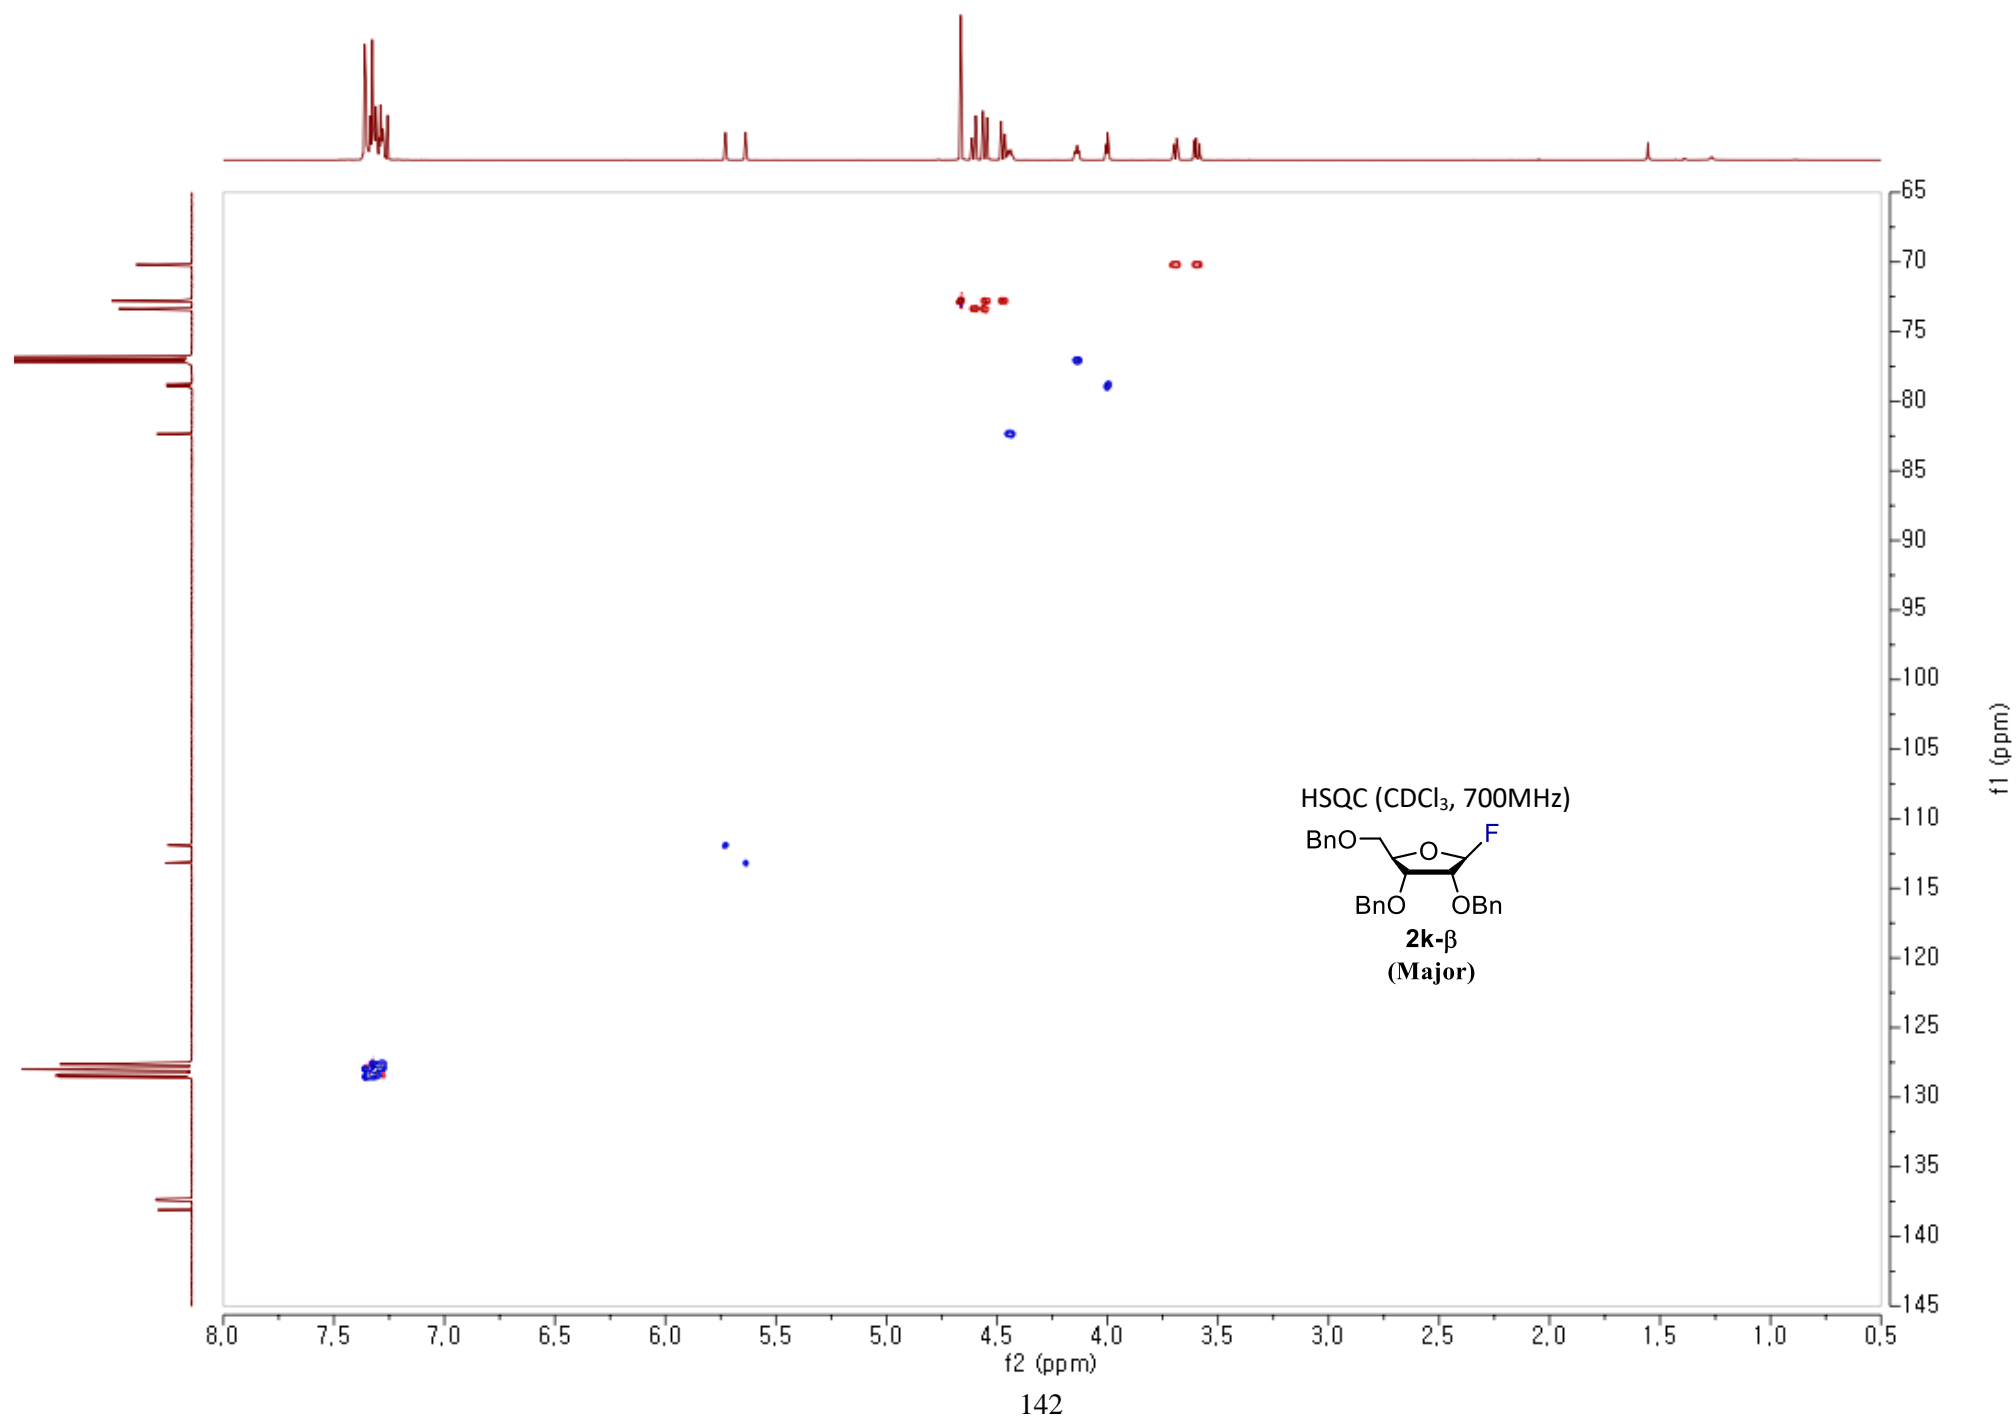

<sup>19</sup>F NMR (CDCl<sub>3</sub>, 471MHz)

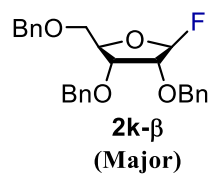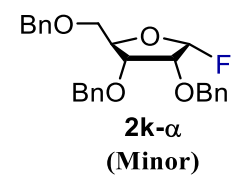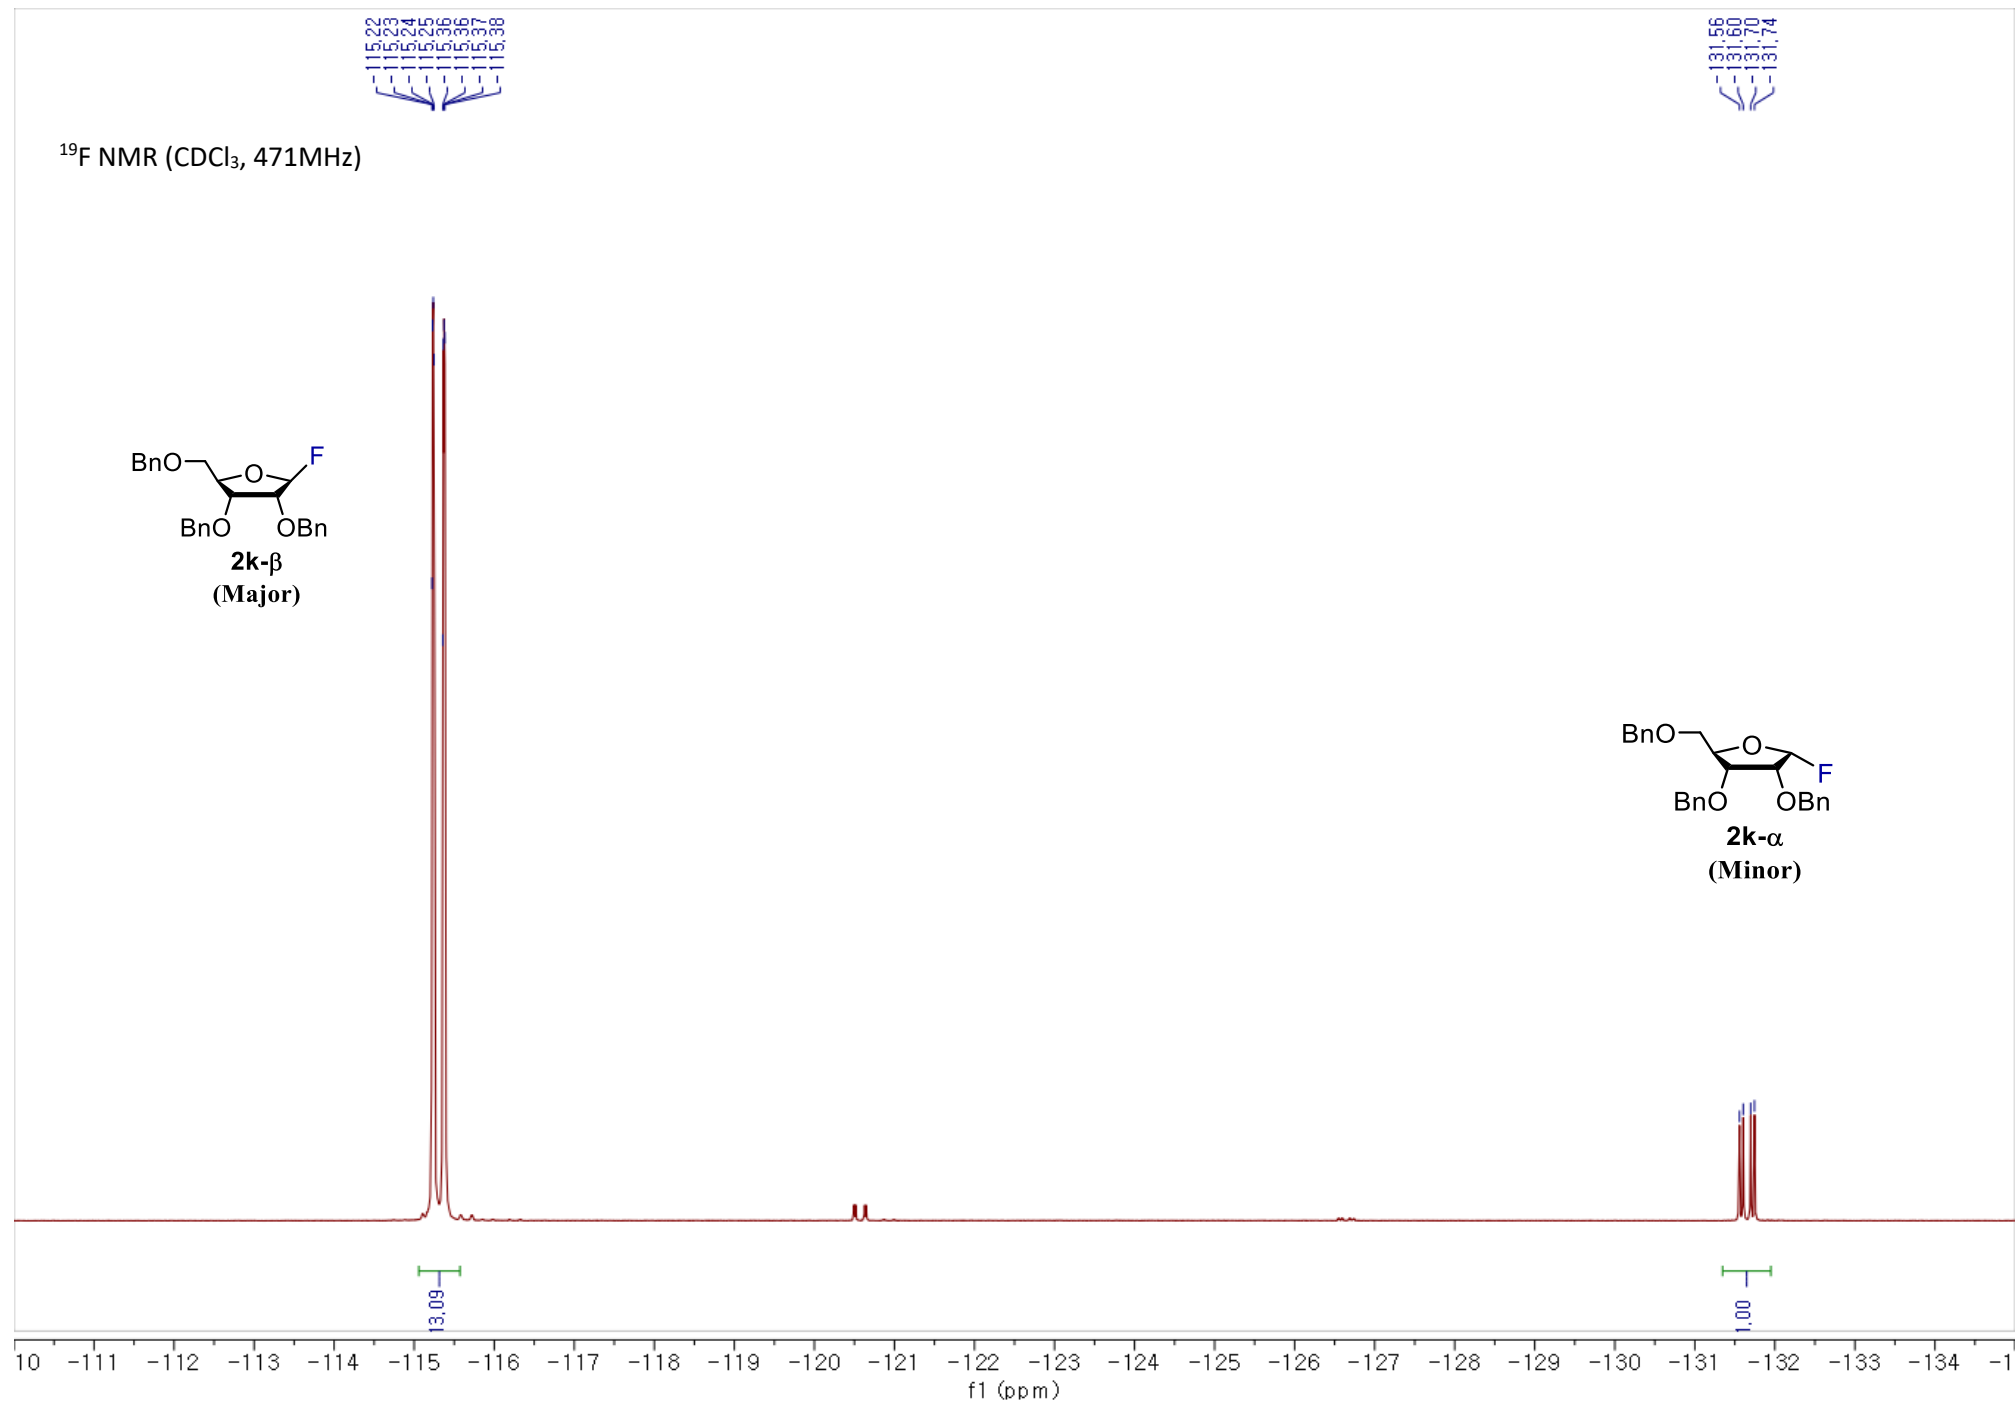

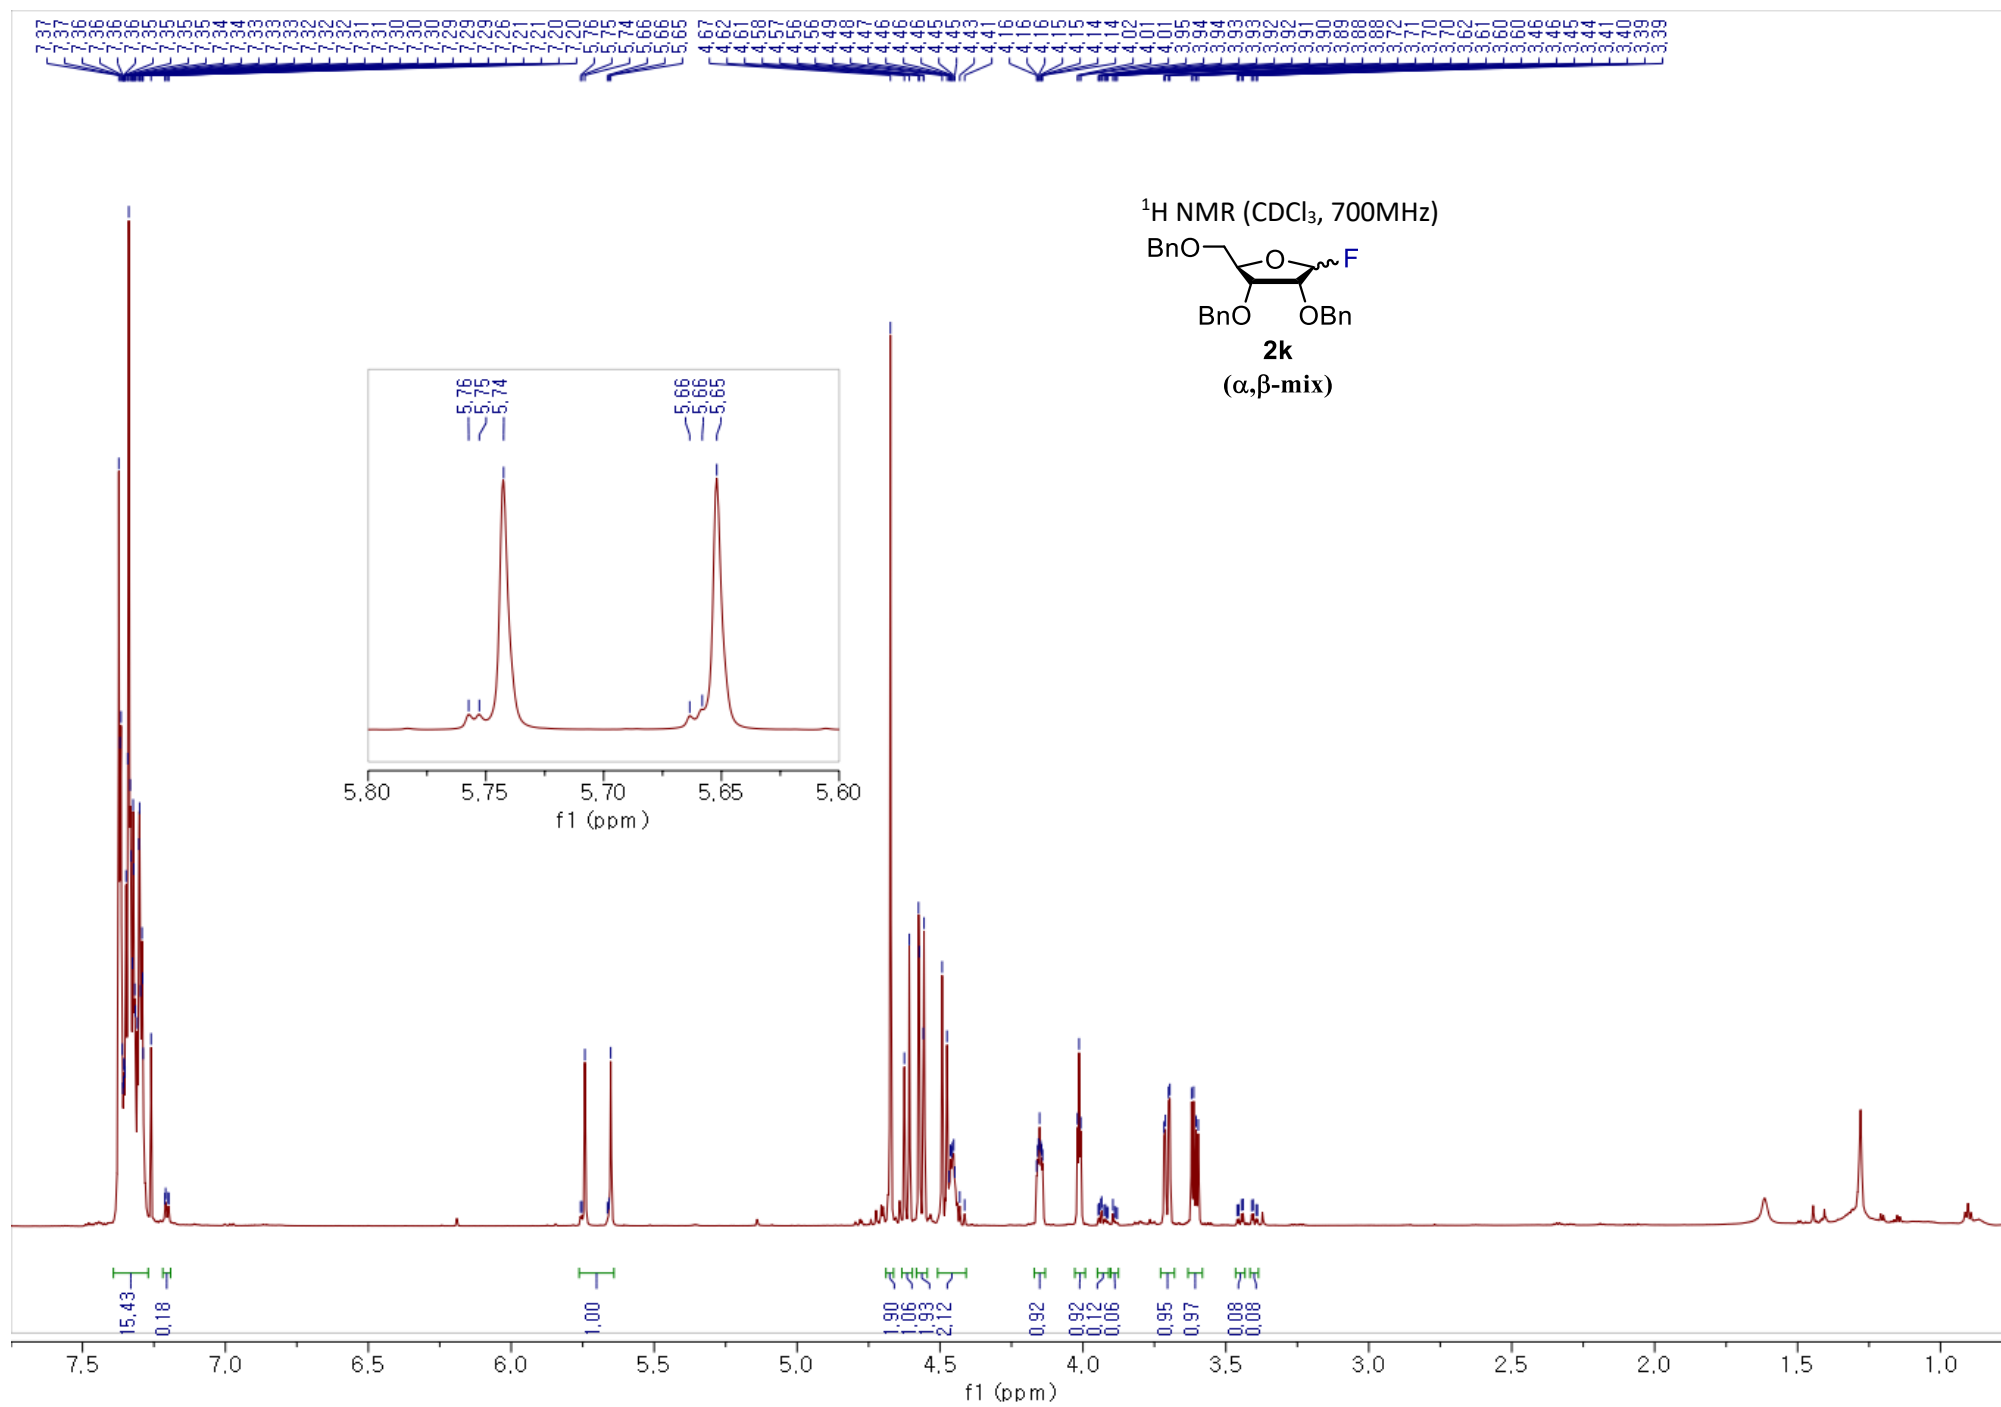

**2,3-Bis-*O*-(phenylmethyl)-4,6-*O*-[(*R*)-phenylmethylene]- $\alpha$ -D-mannopyranosyl fluoride (2I- $\alpha$ , Major diastereomer)**

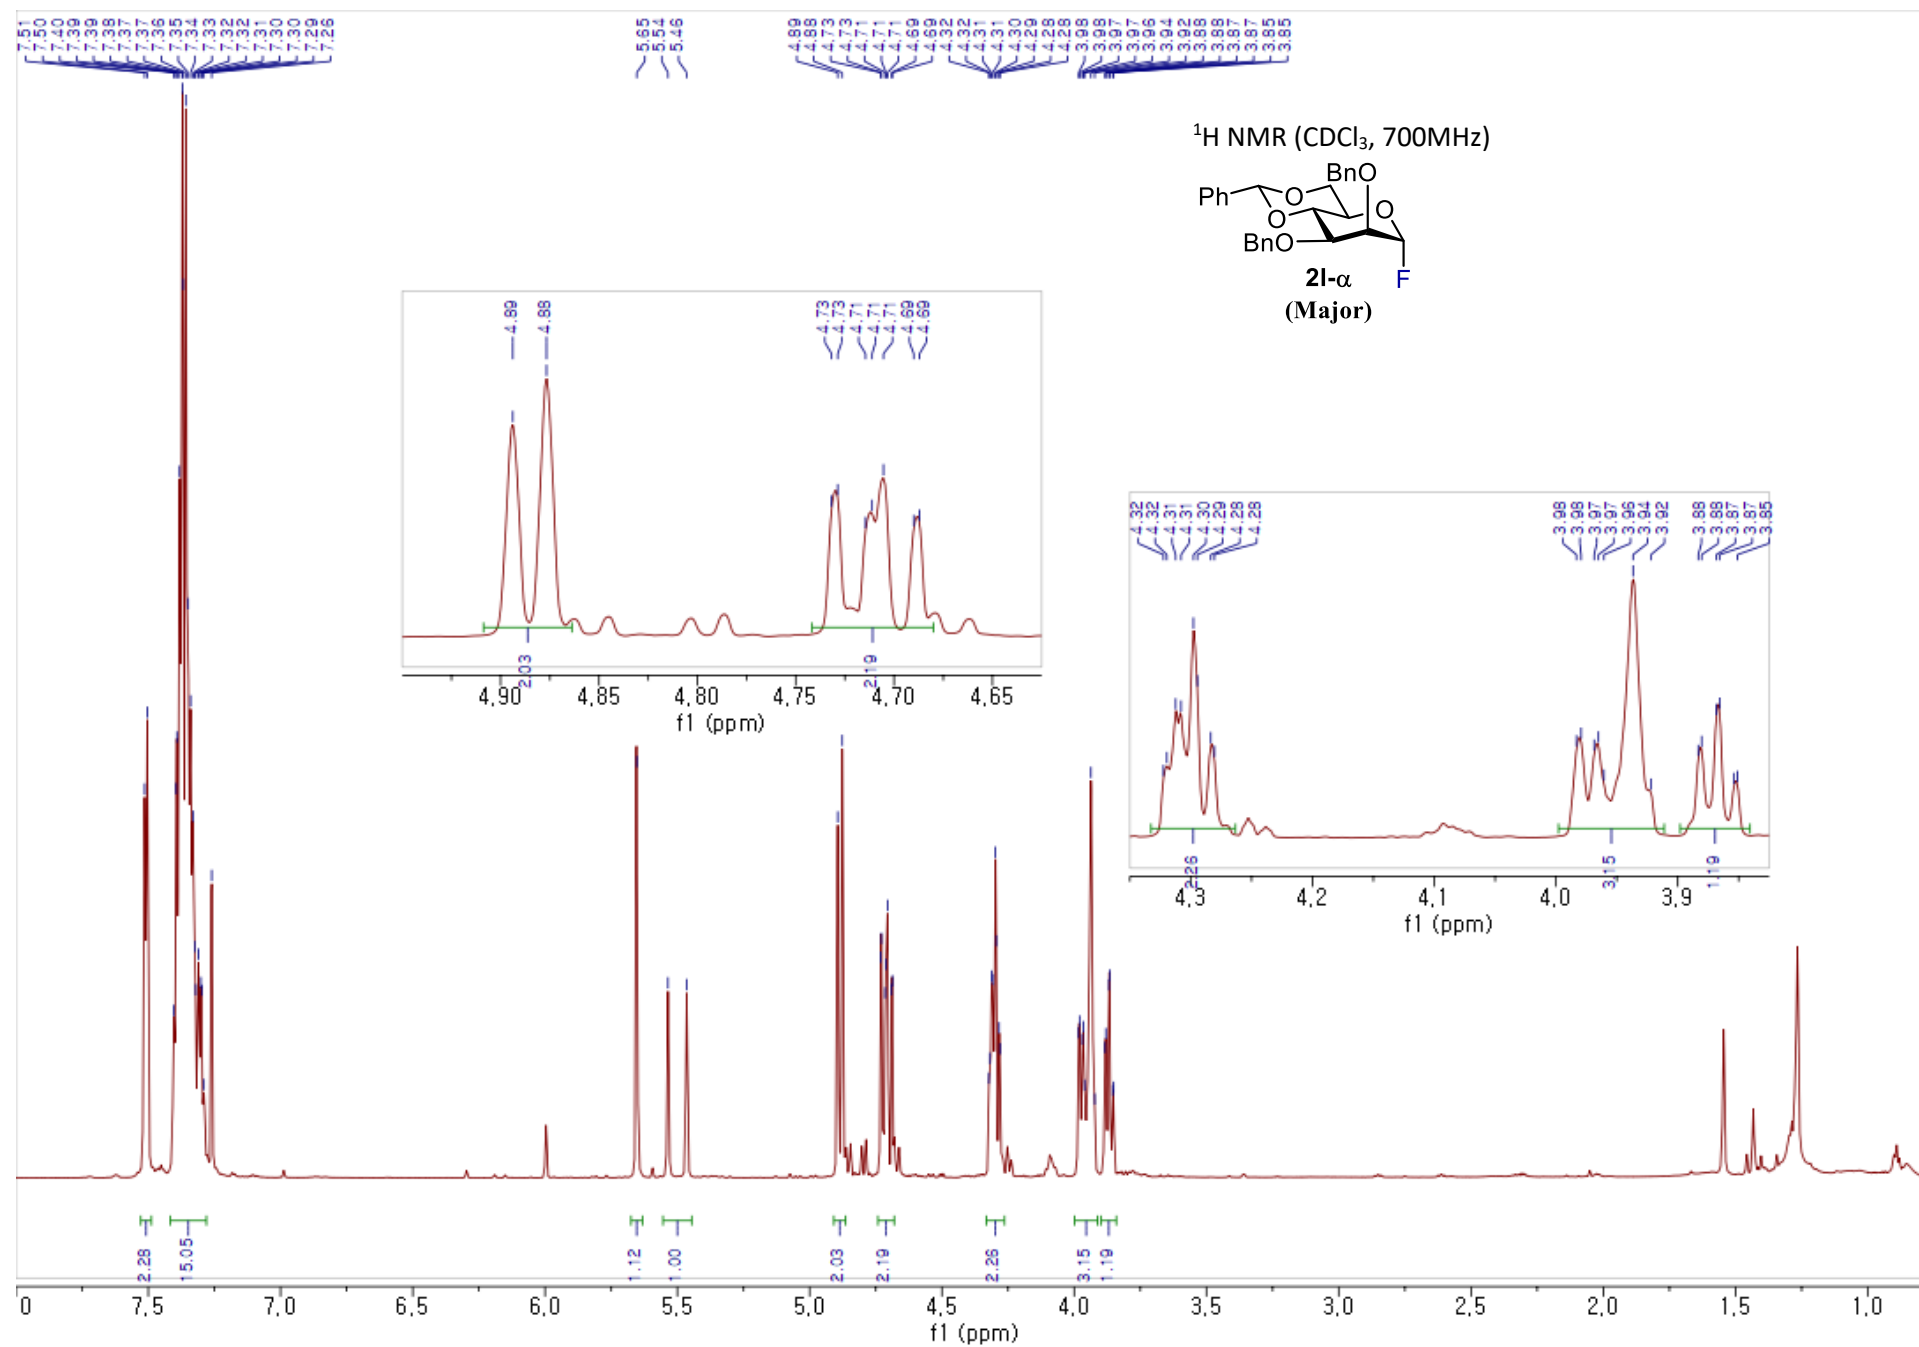

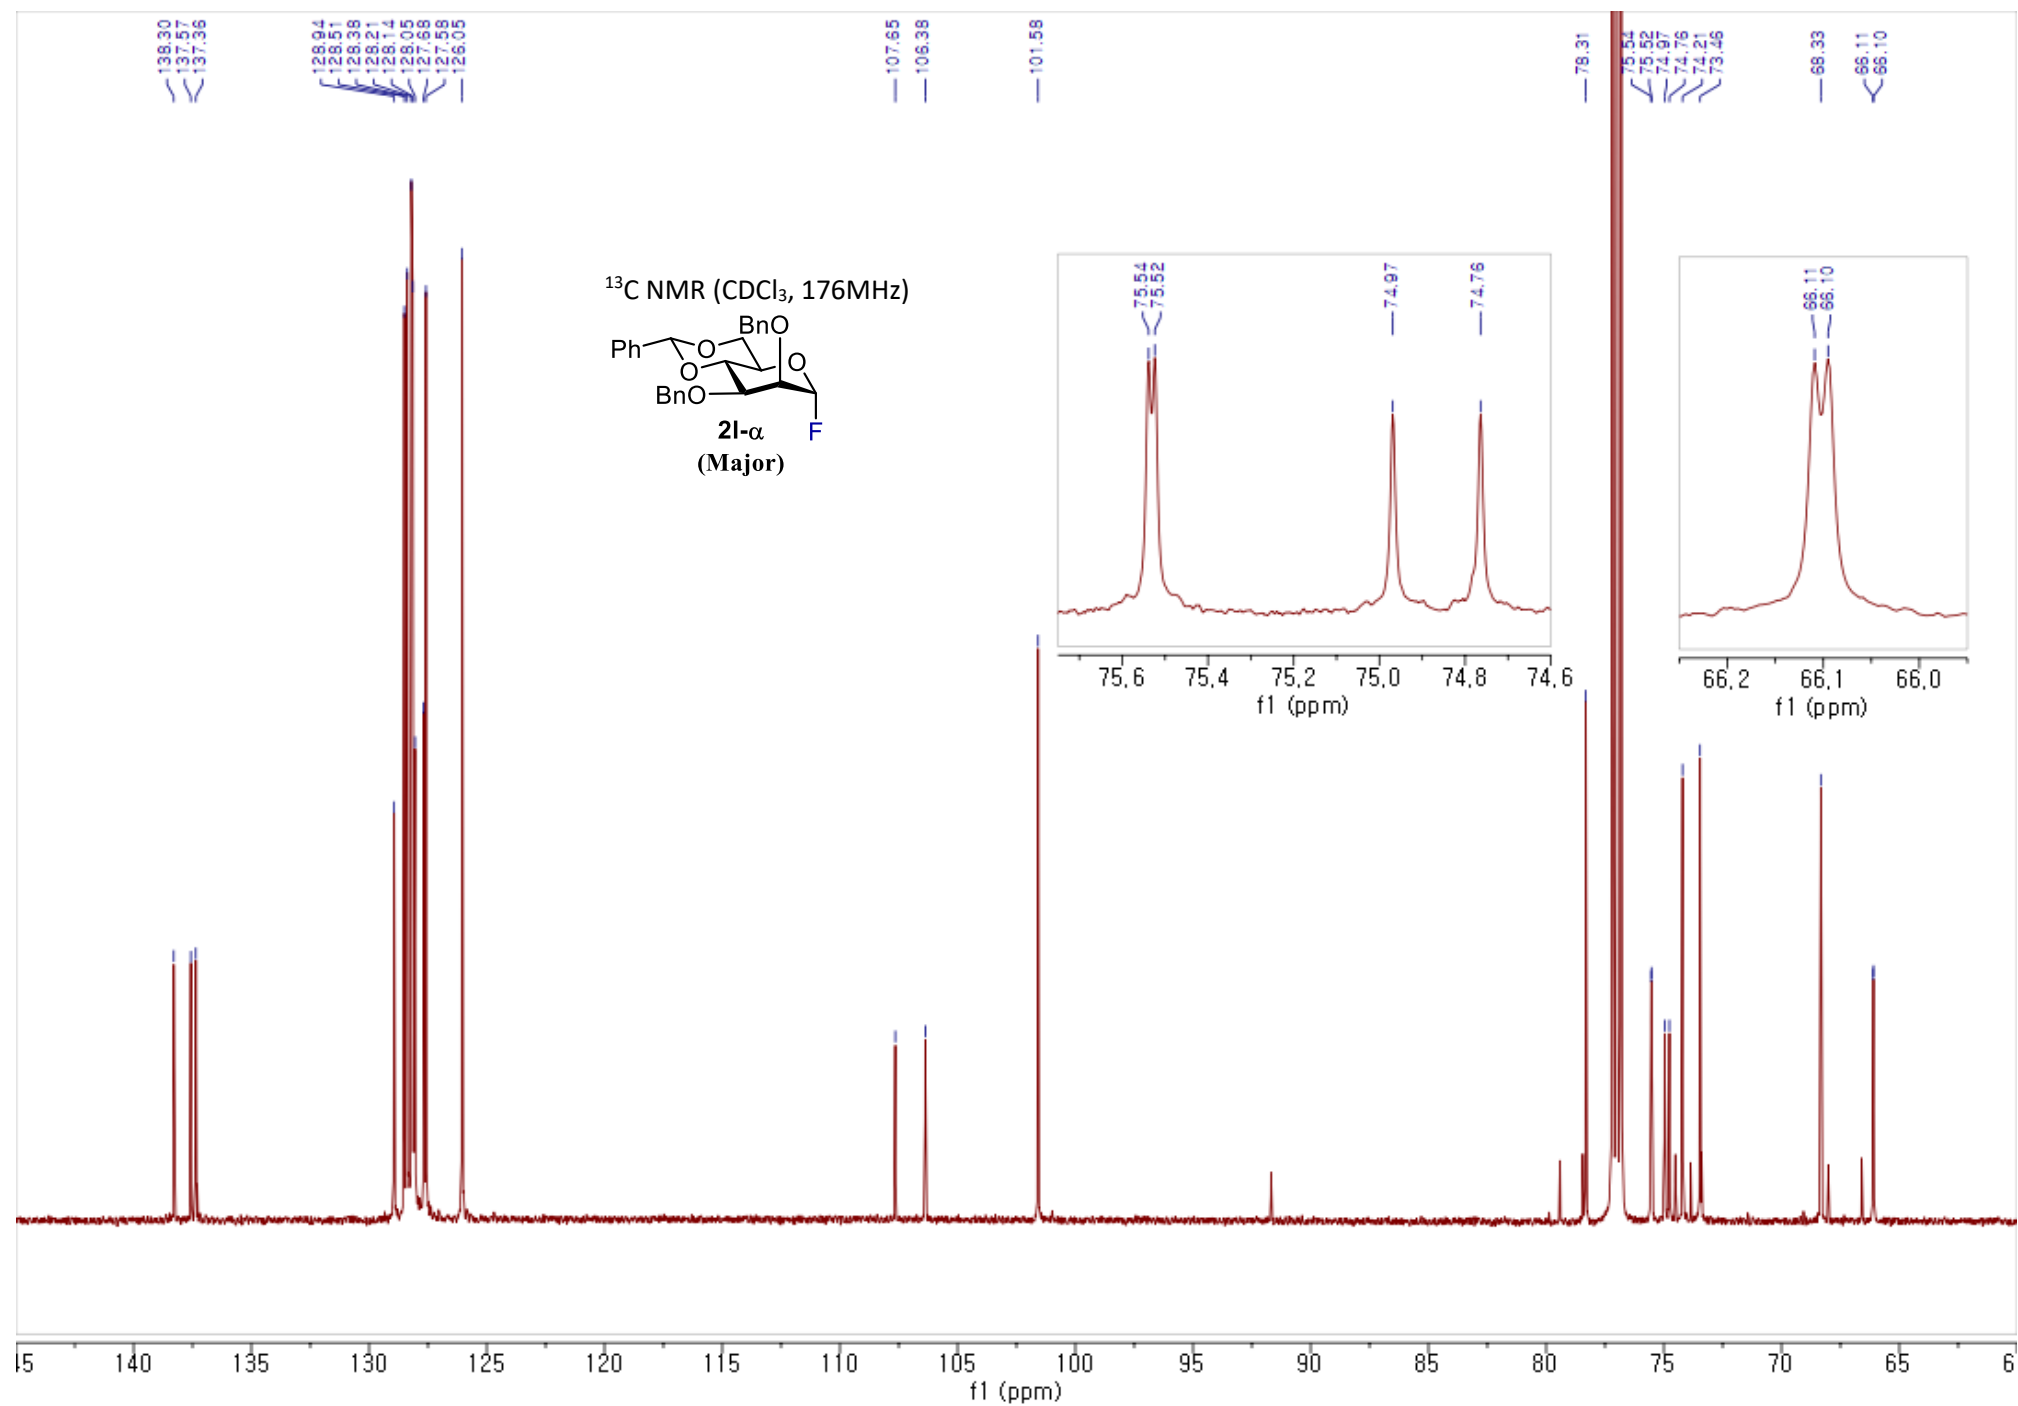

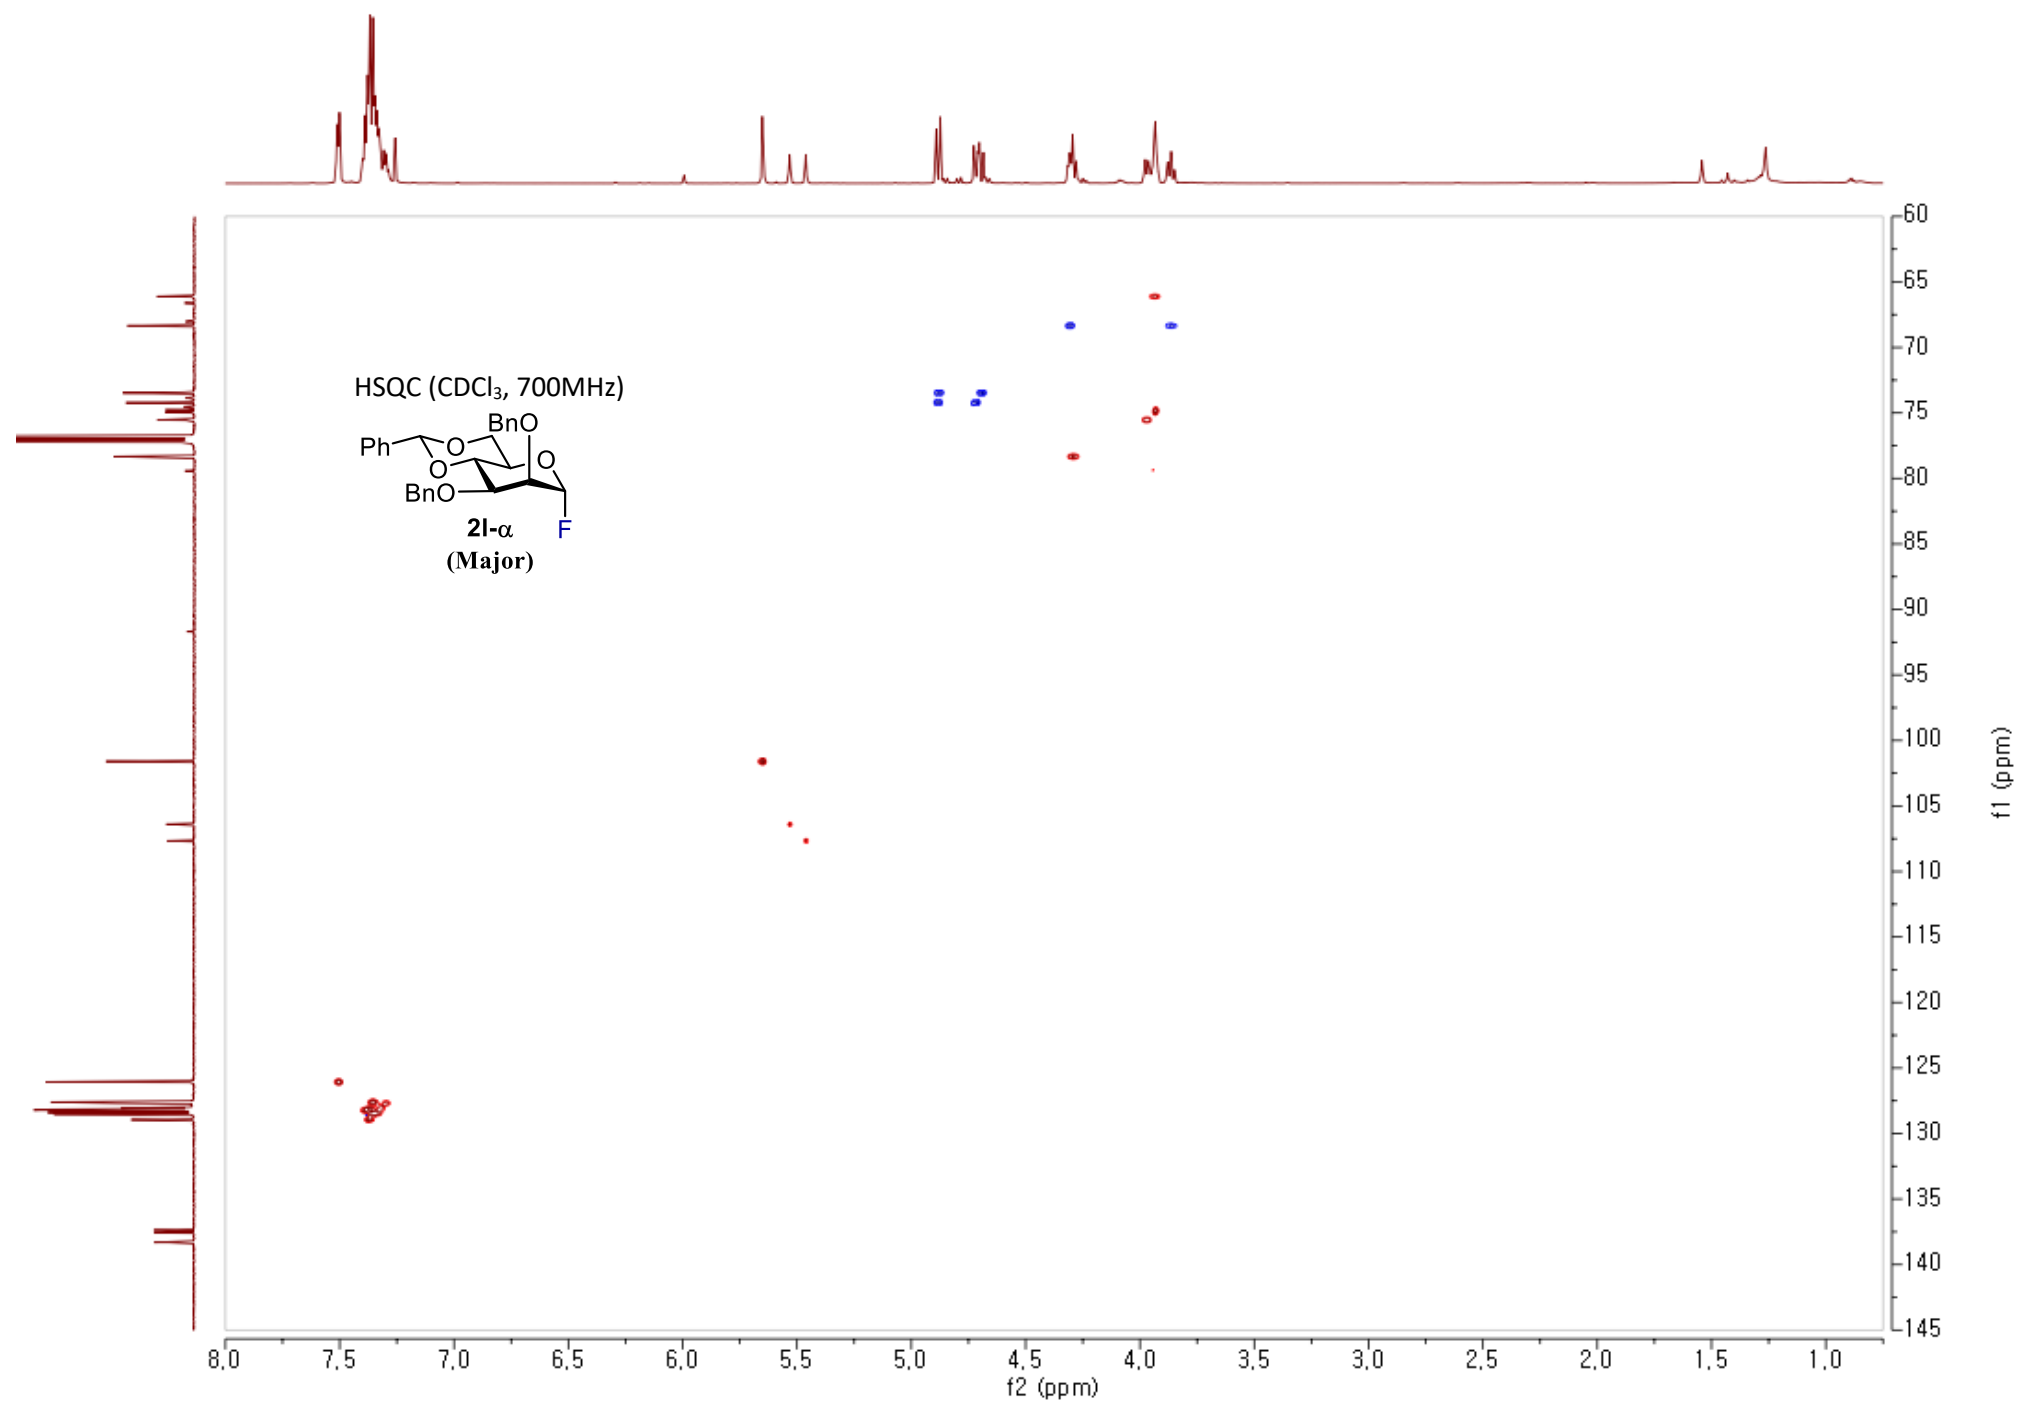

2,3-Bis-*O*-(phenylmethyl)-4,6-*O*-[(*R*)-phenylmethylene]- $\beta$ -D-mannopyranosyl fluoride (2I- $\beta$ , Minor diastereomer)

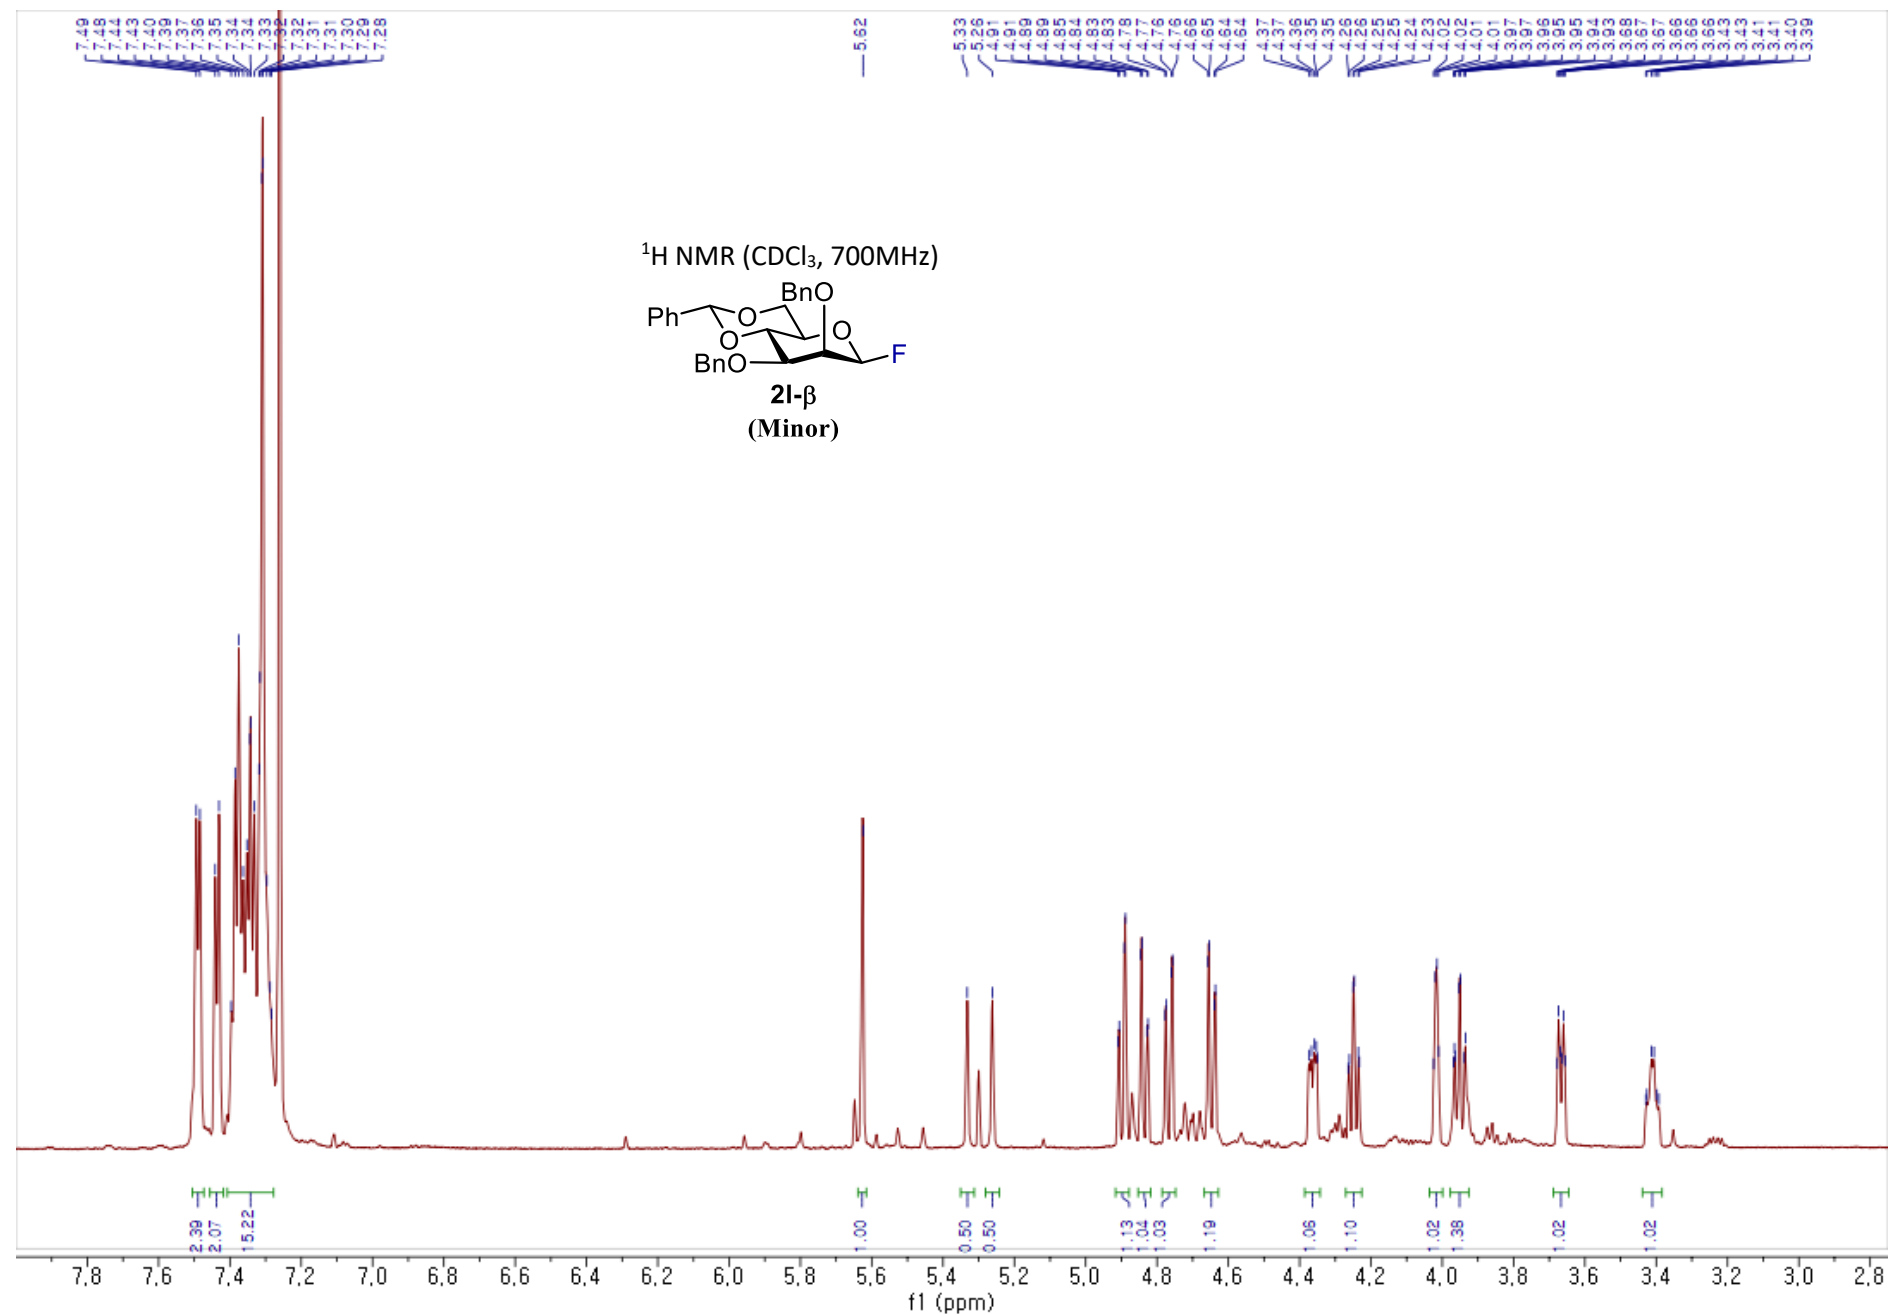

<sup>13</sup>C NMR (CDCl<sub>3</sub>, 176MHz)

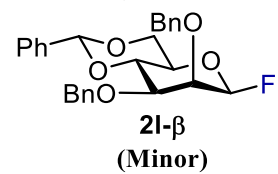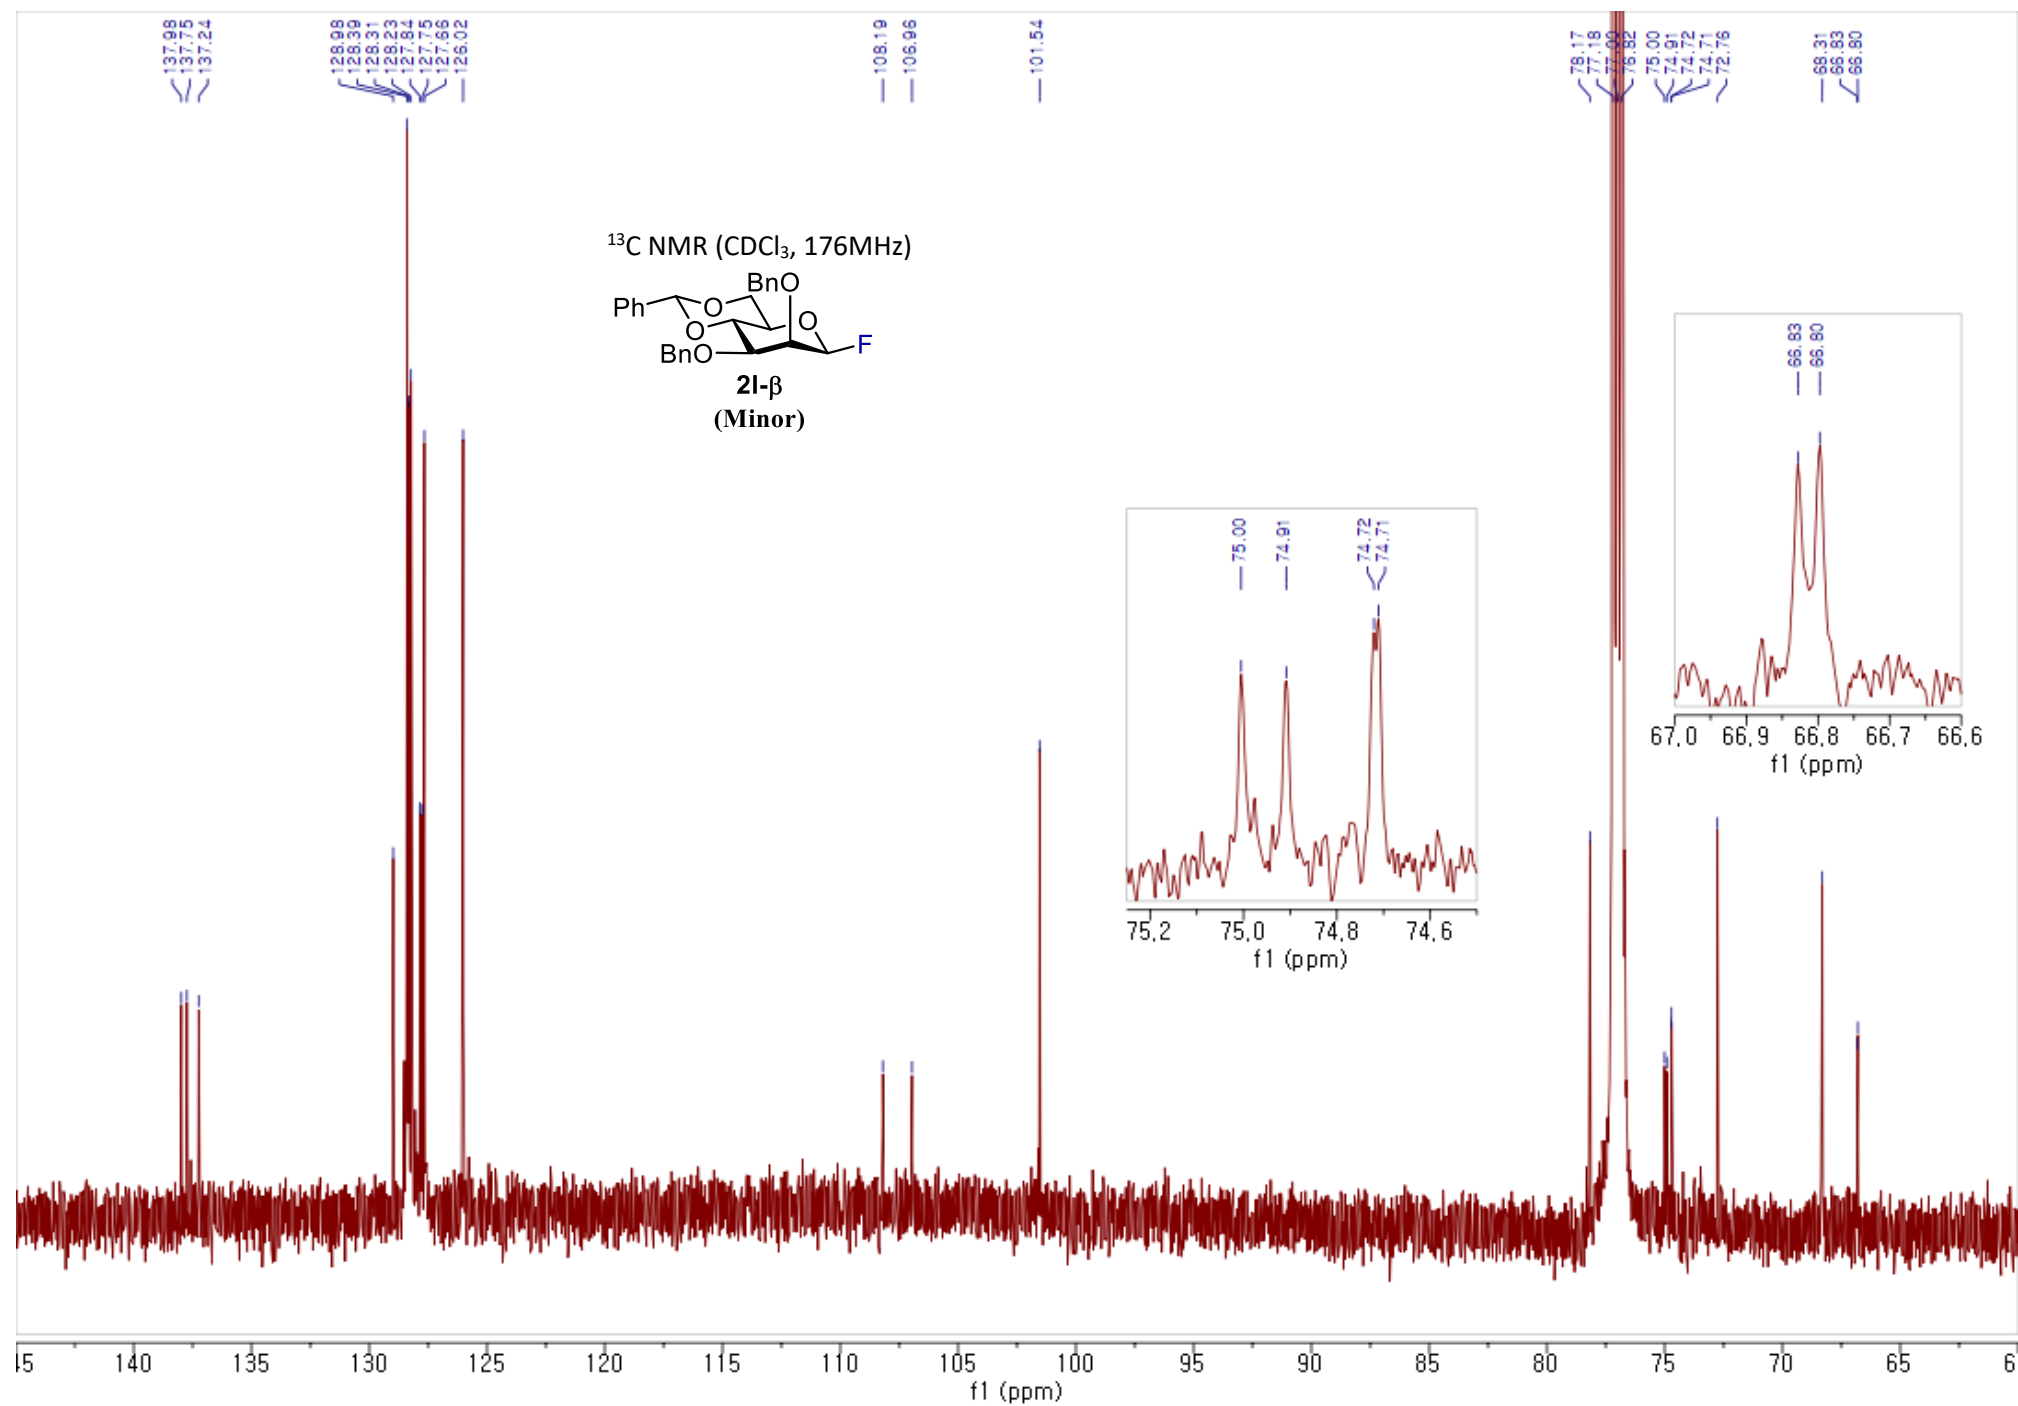

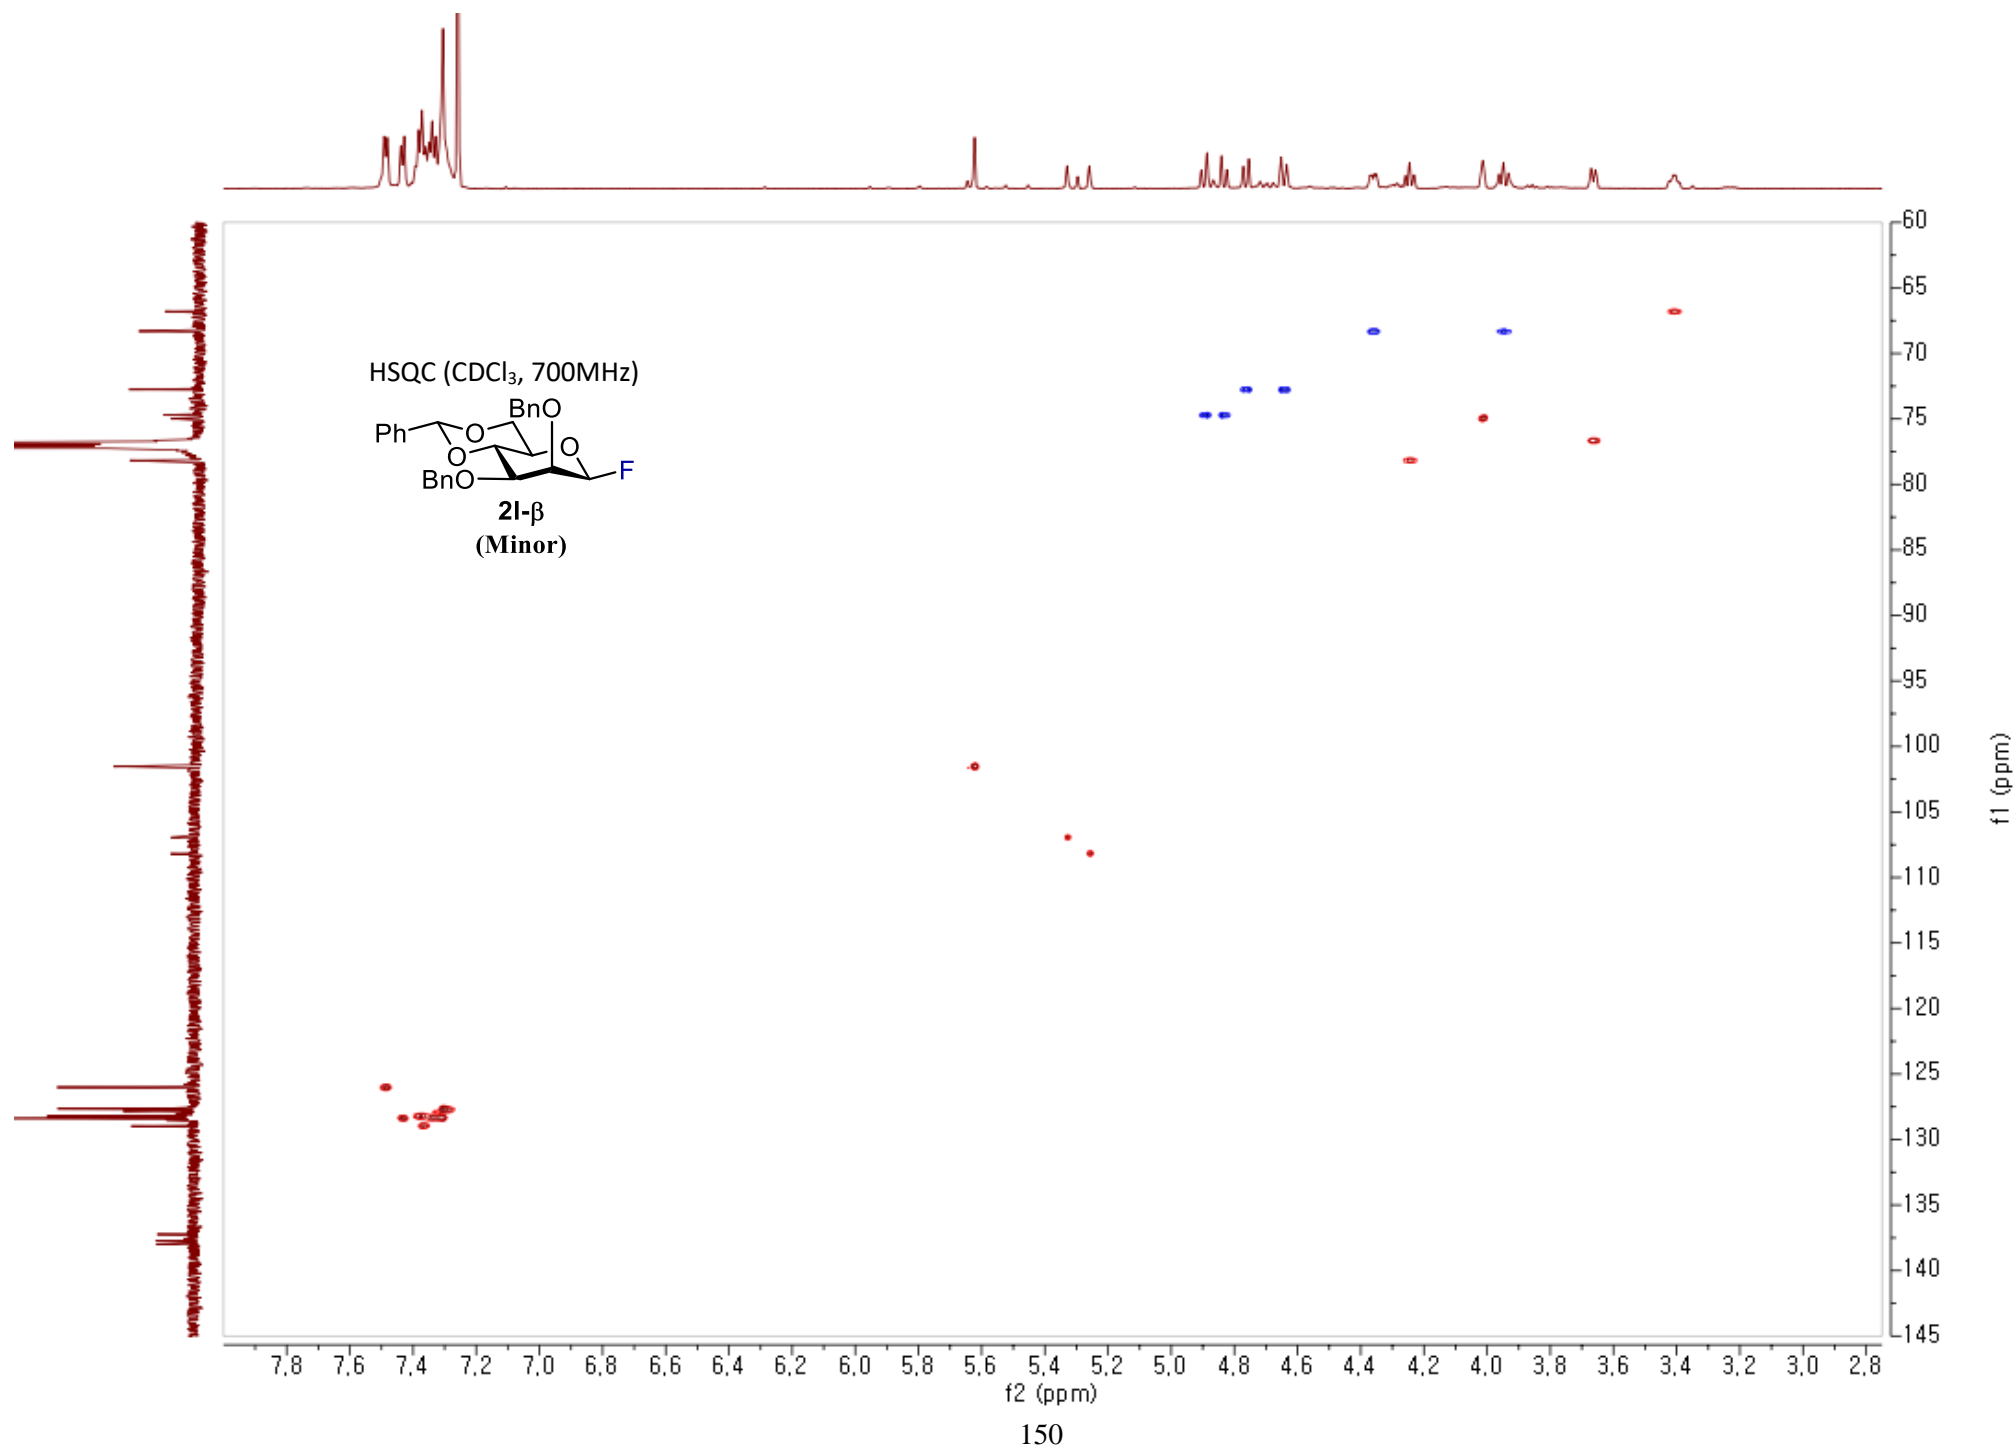

$^{19}\text{F}$  NMR ( $\text{CDCl}_3$ , 471MHz)

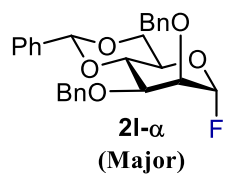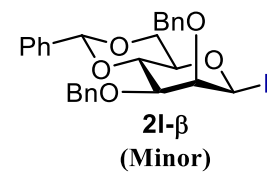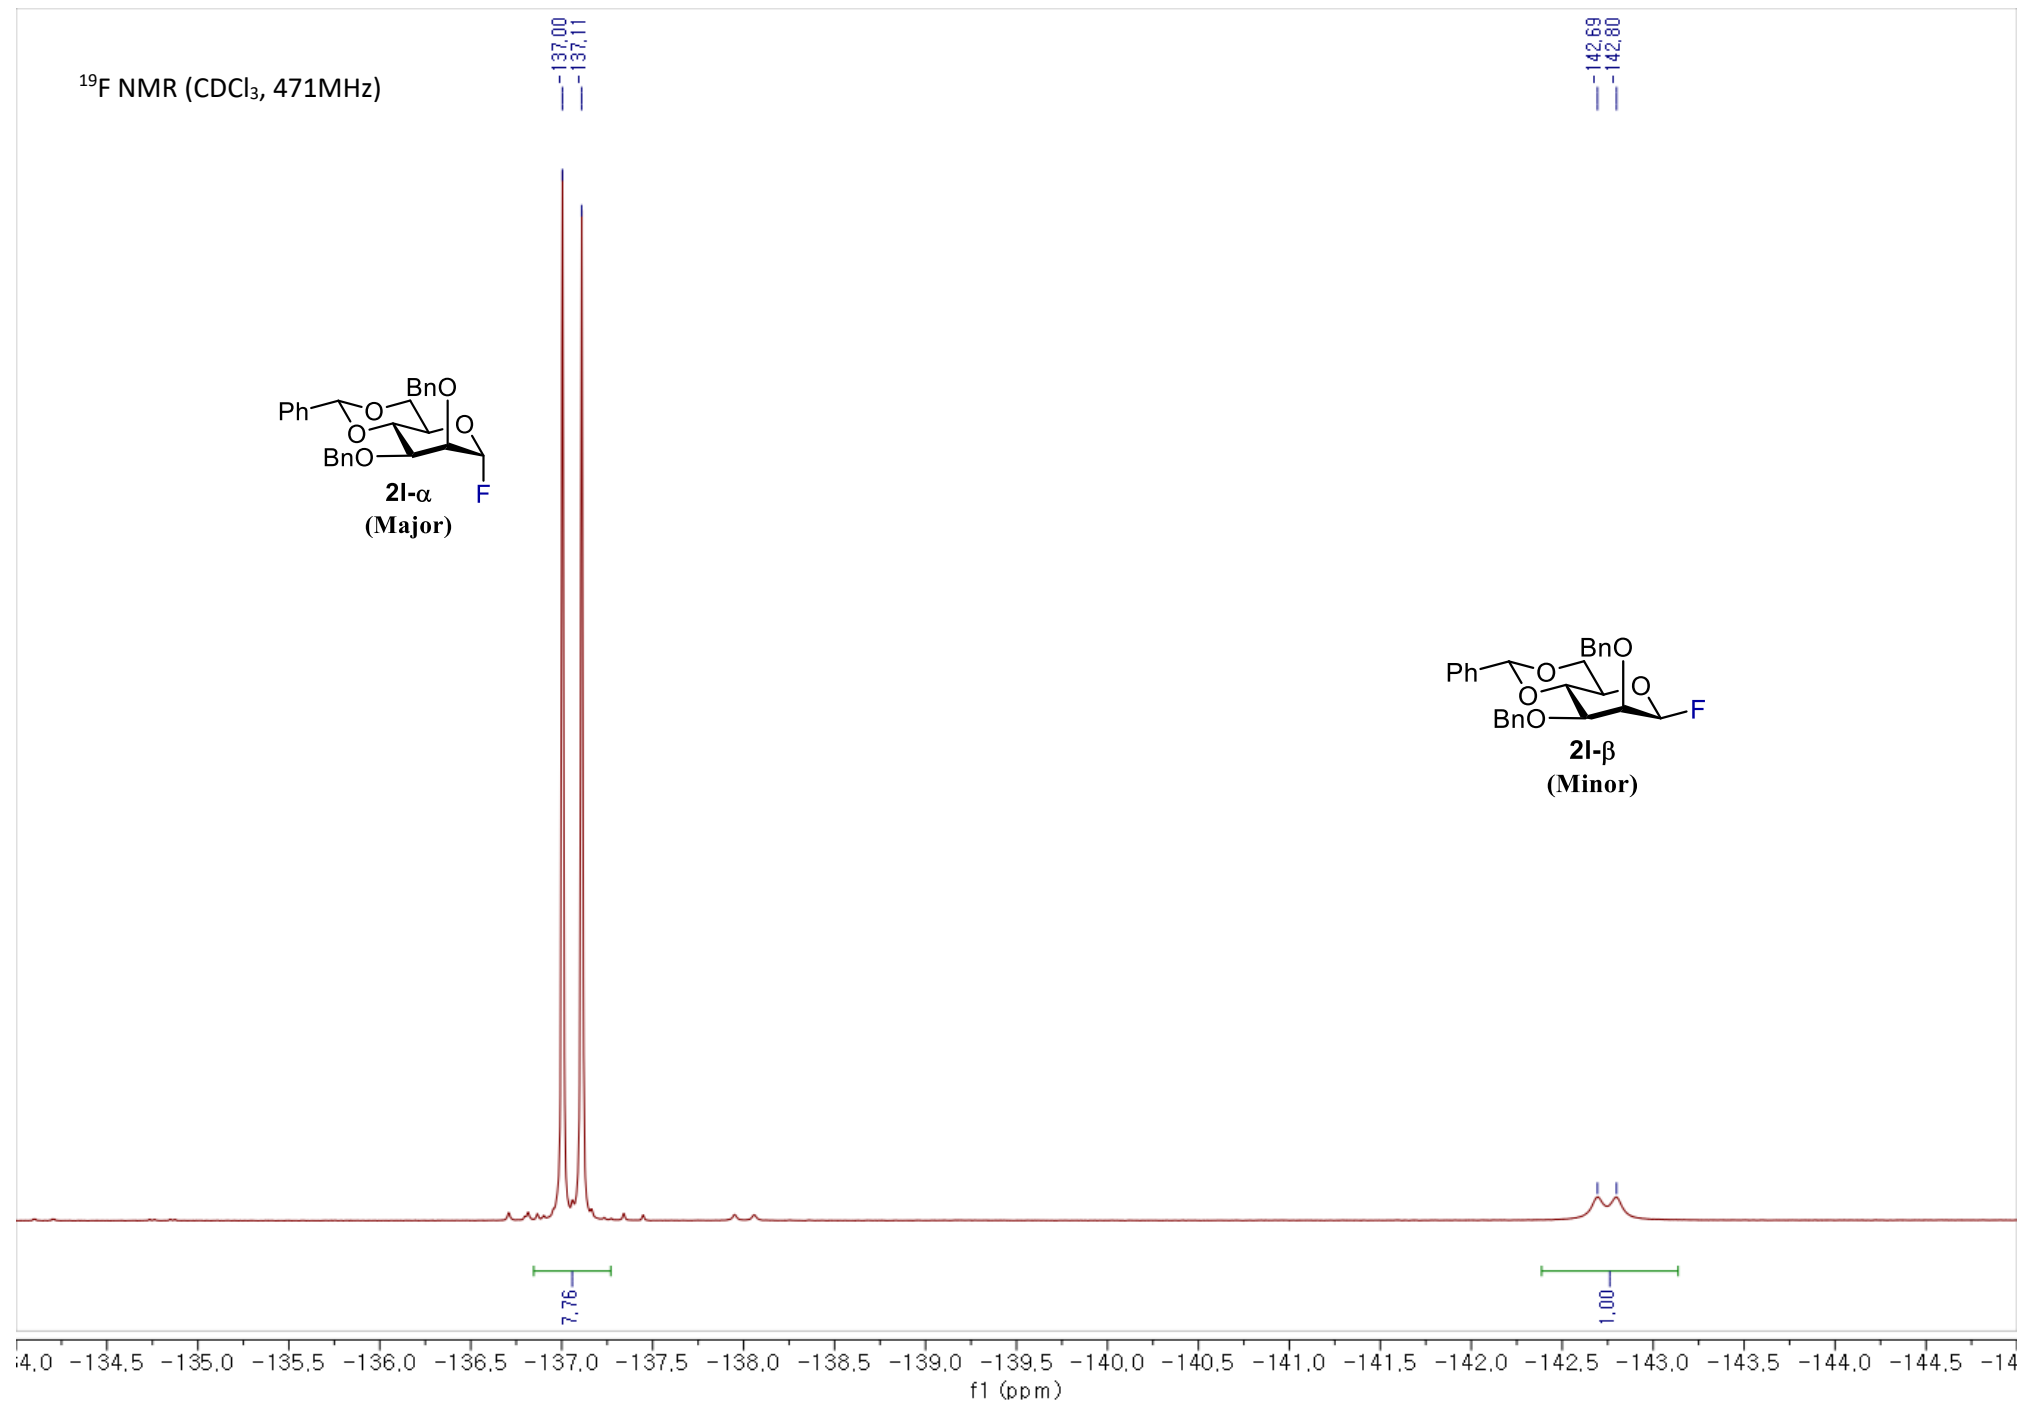

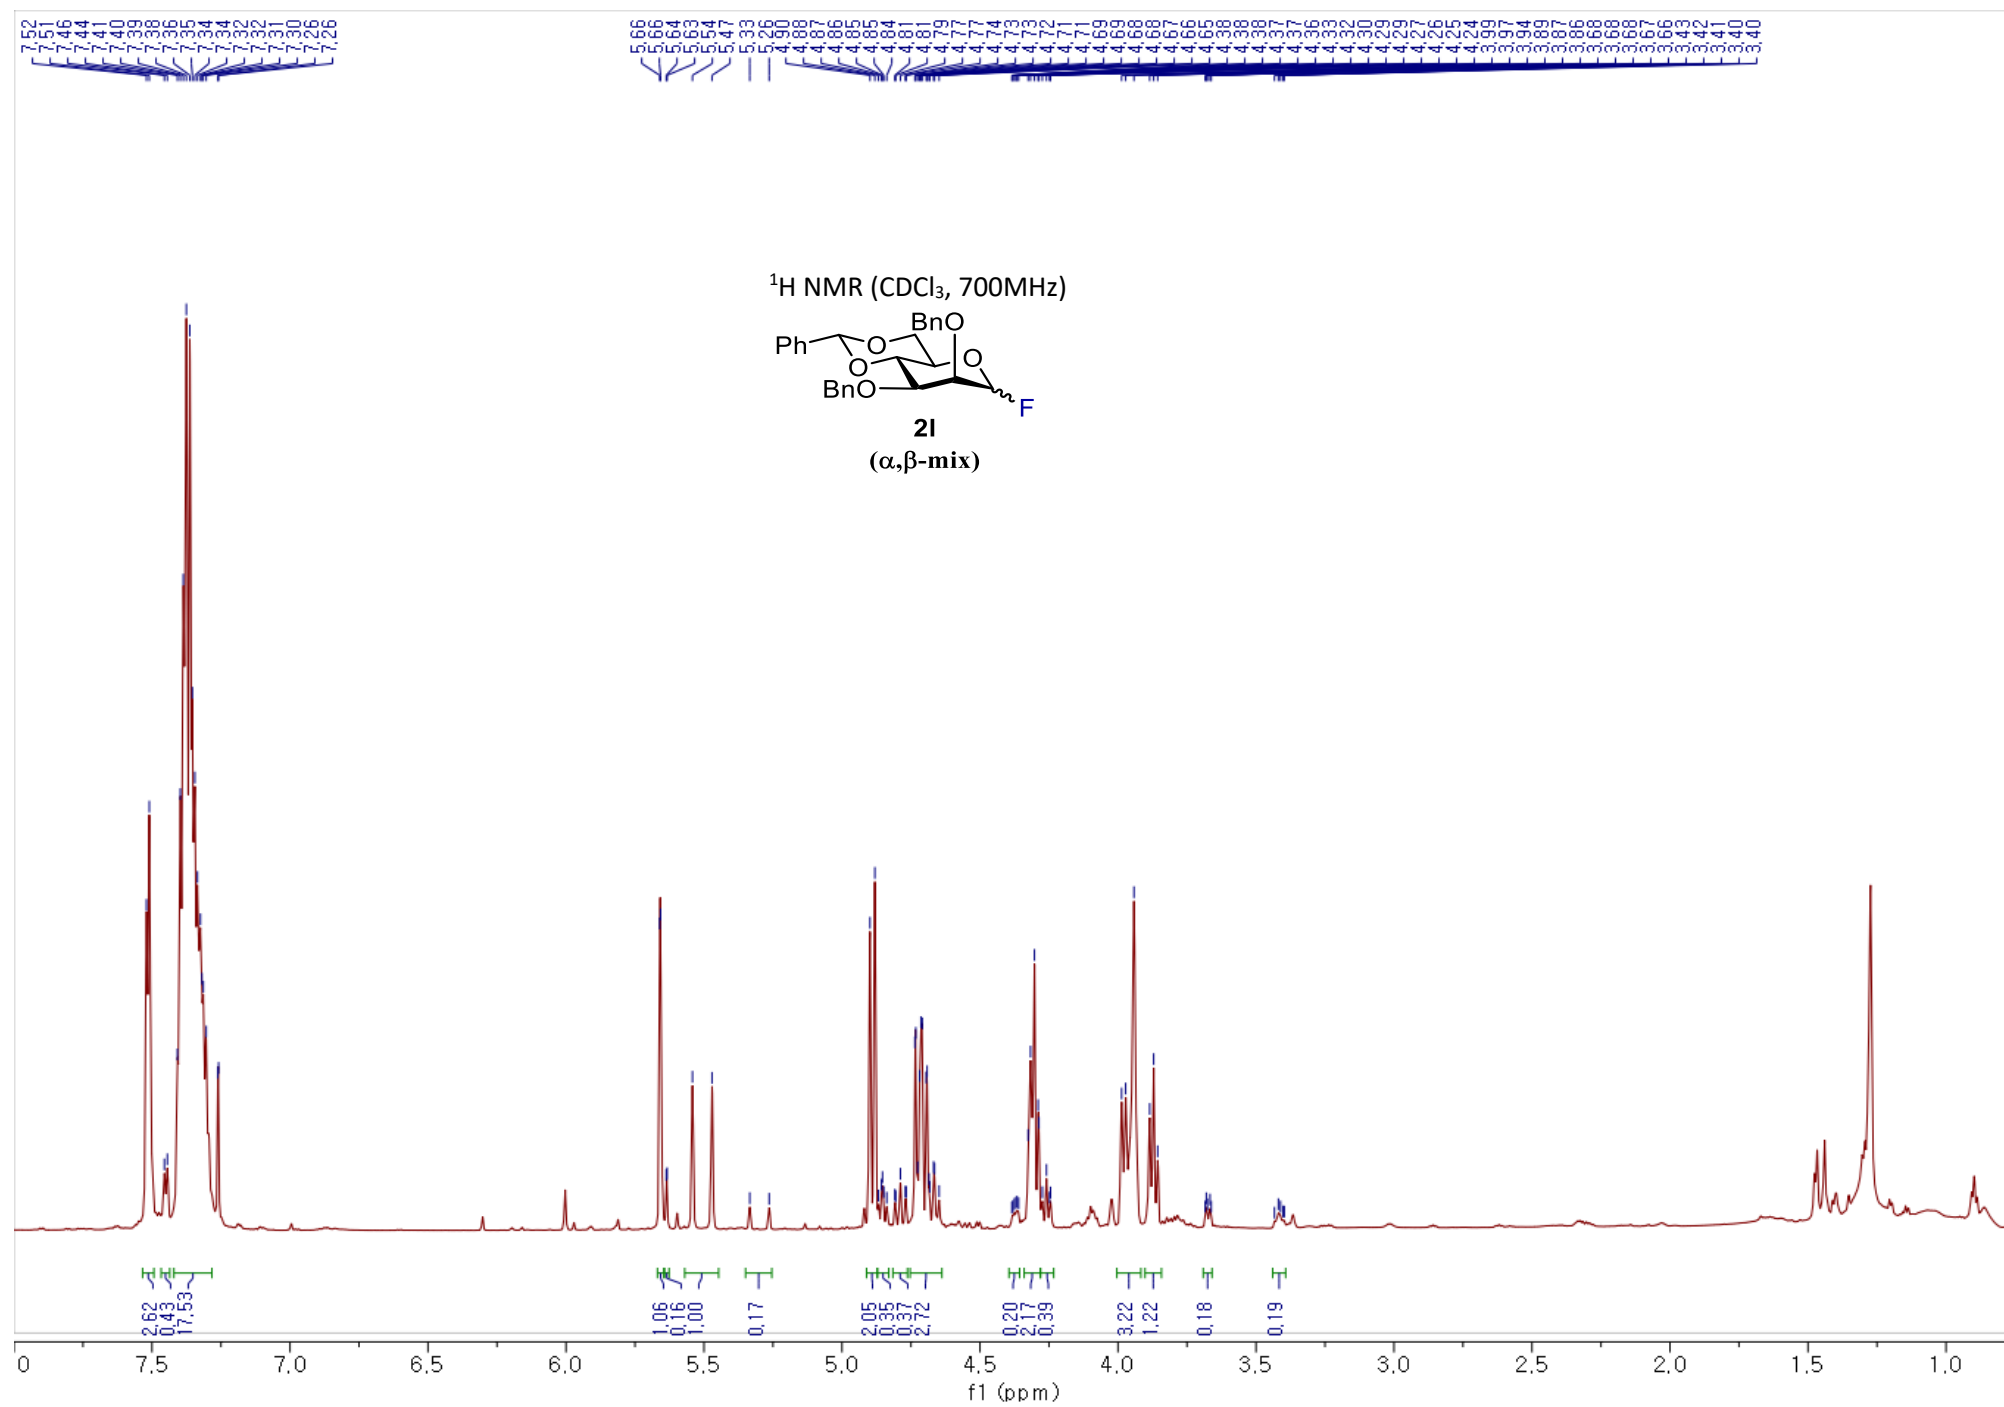

2,3,4,6-Tetrakis-O-[(4-methoxyphenyl)methyl]- $\alpha$ -D-mannopyranosyl fluoride (2m-  $\alpha$ , Major diastereomer)

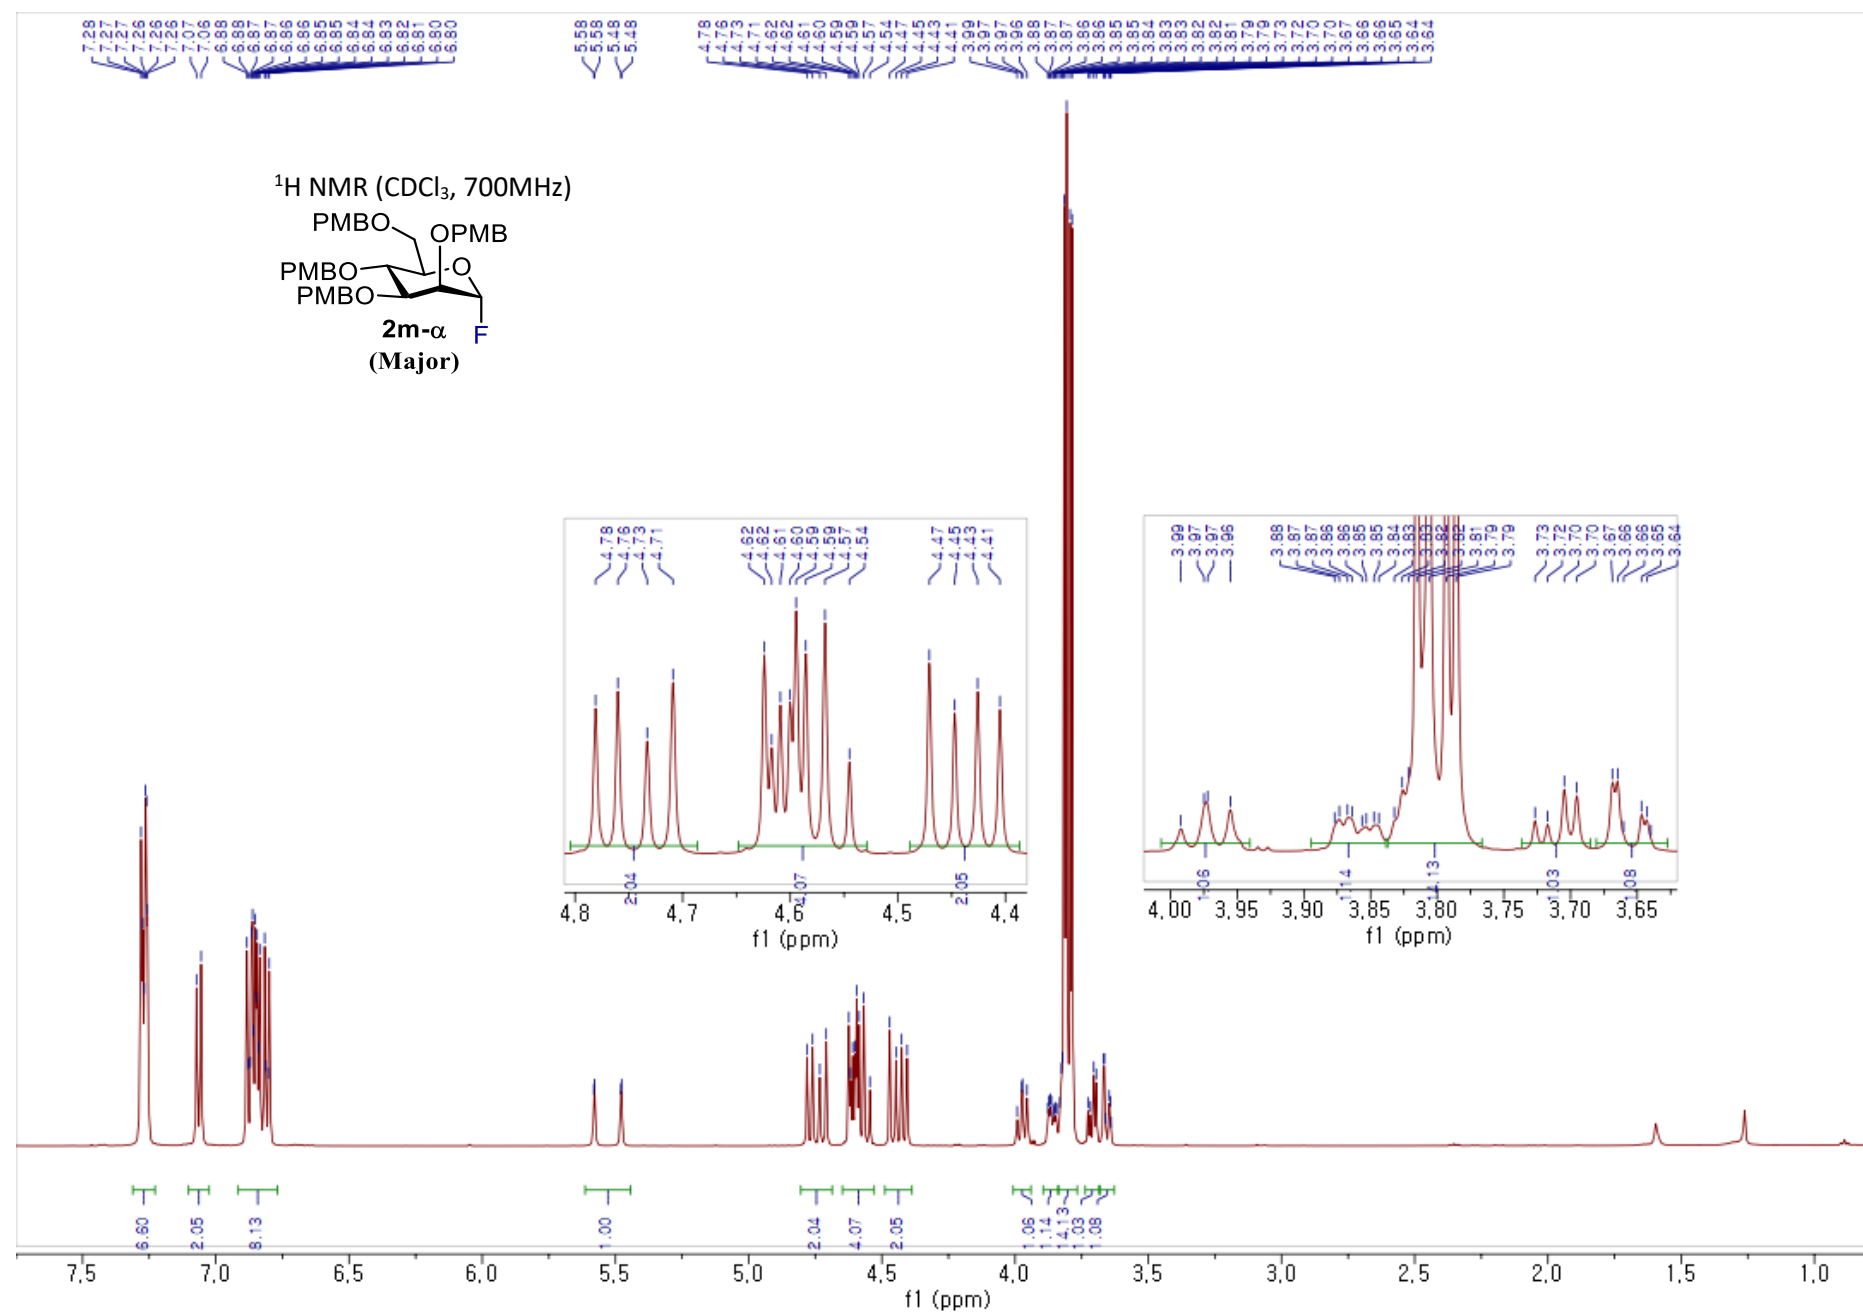

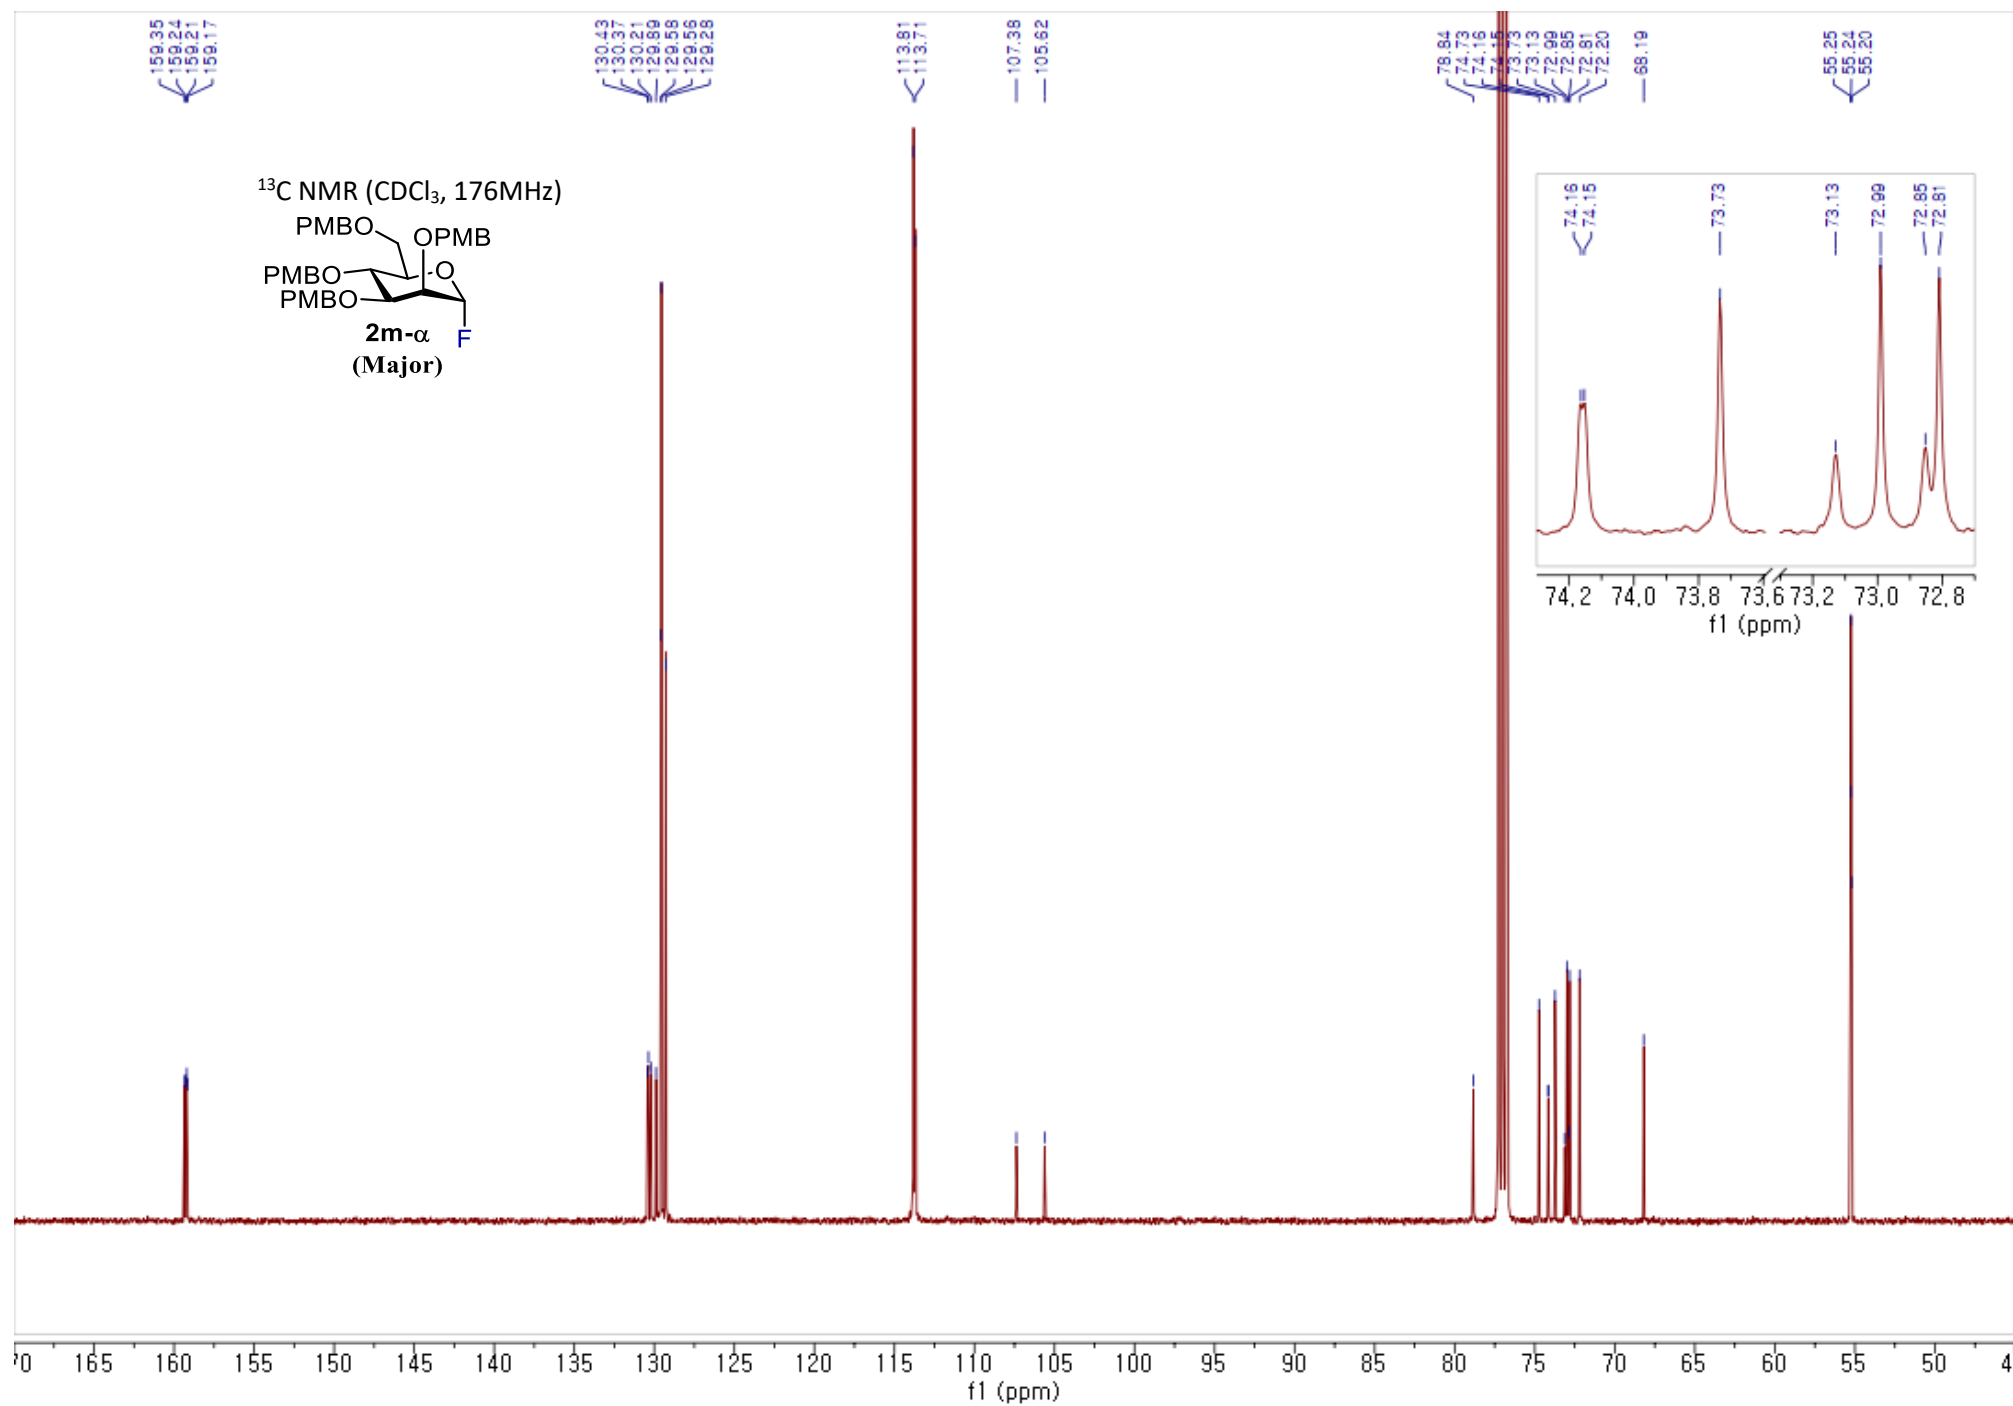

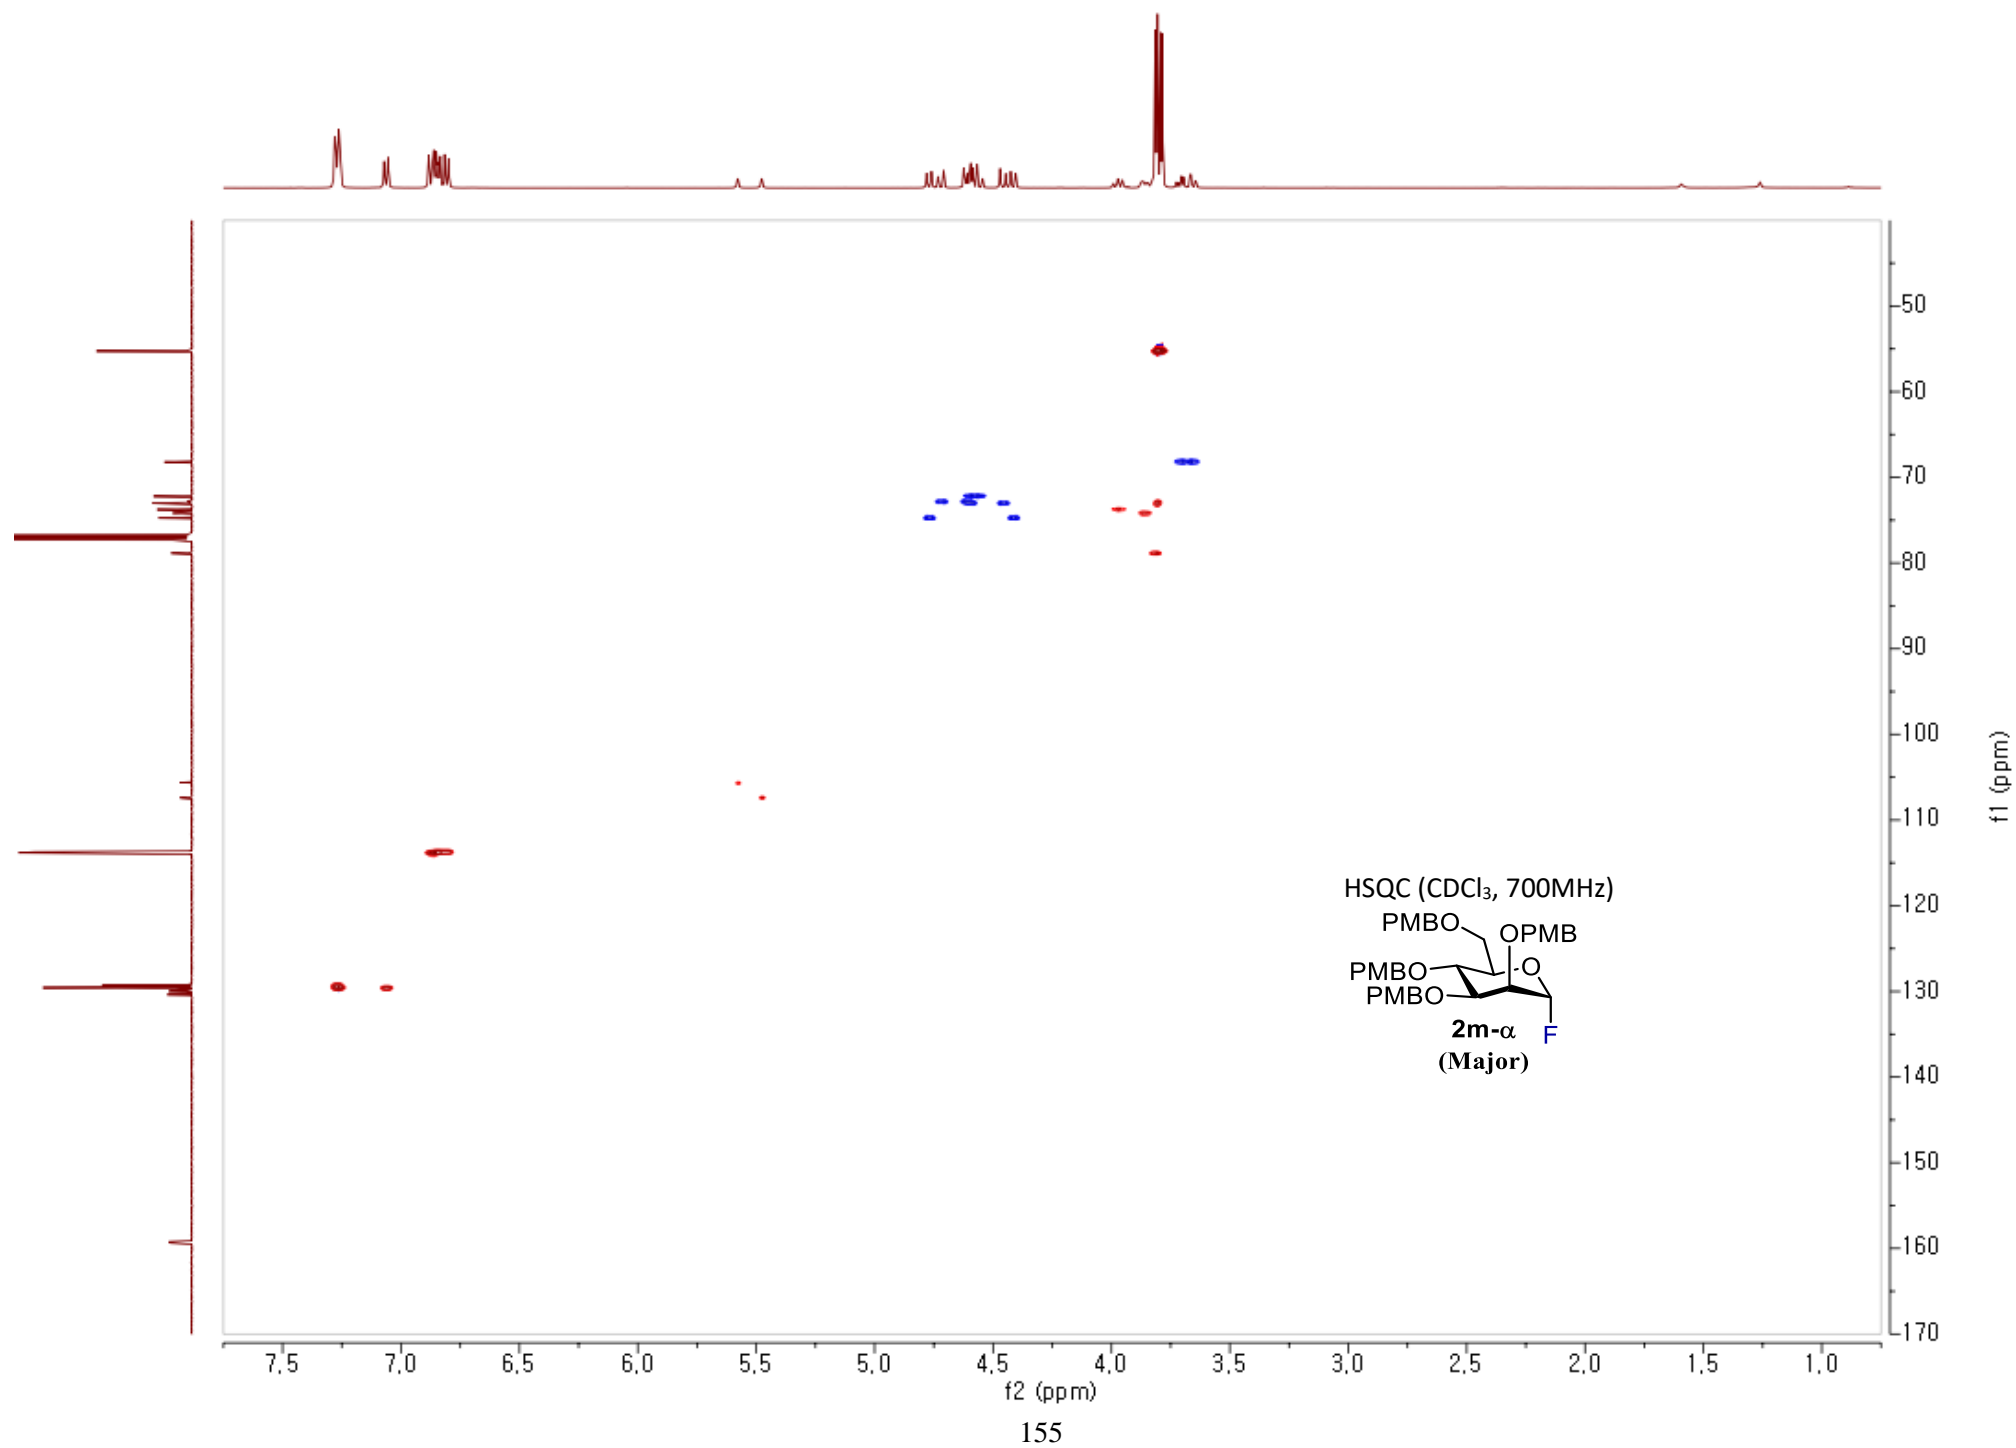

$^{19}\text{F}$  NMR ( $\text{CDCl}_3$ , 376MHz)

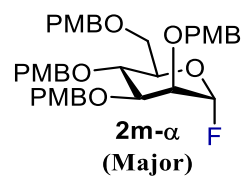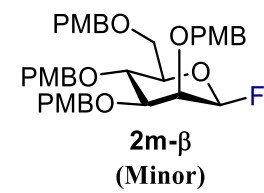

— -137.88  
— -138.01

— -140.95  
— -140.97  
— -141.08  
— -141.11

33.30

1.00

f1 (ppm)

156

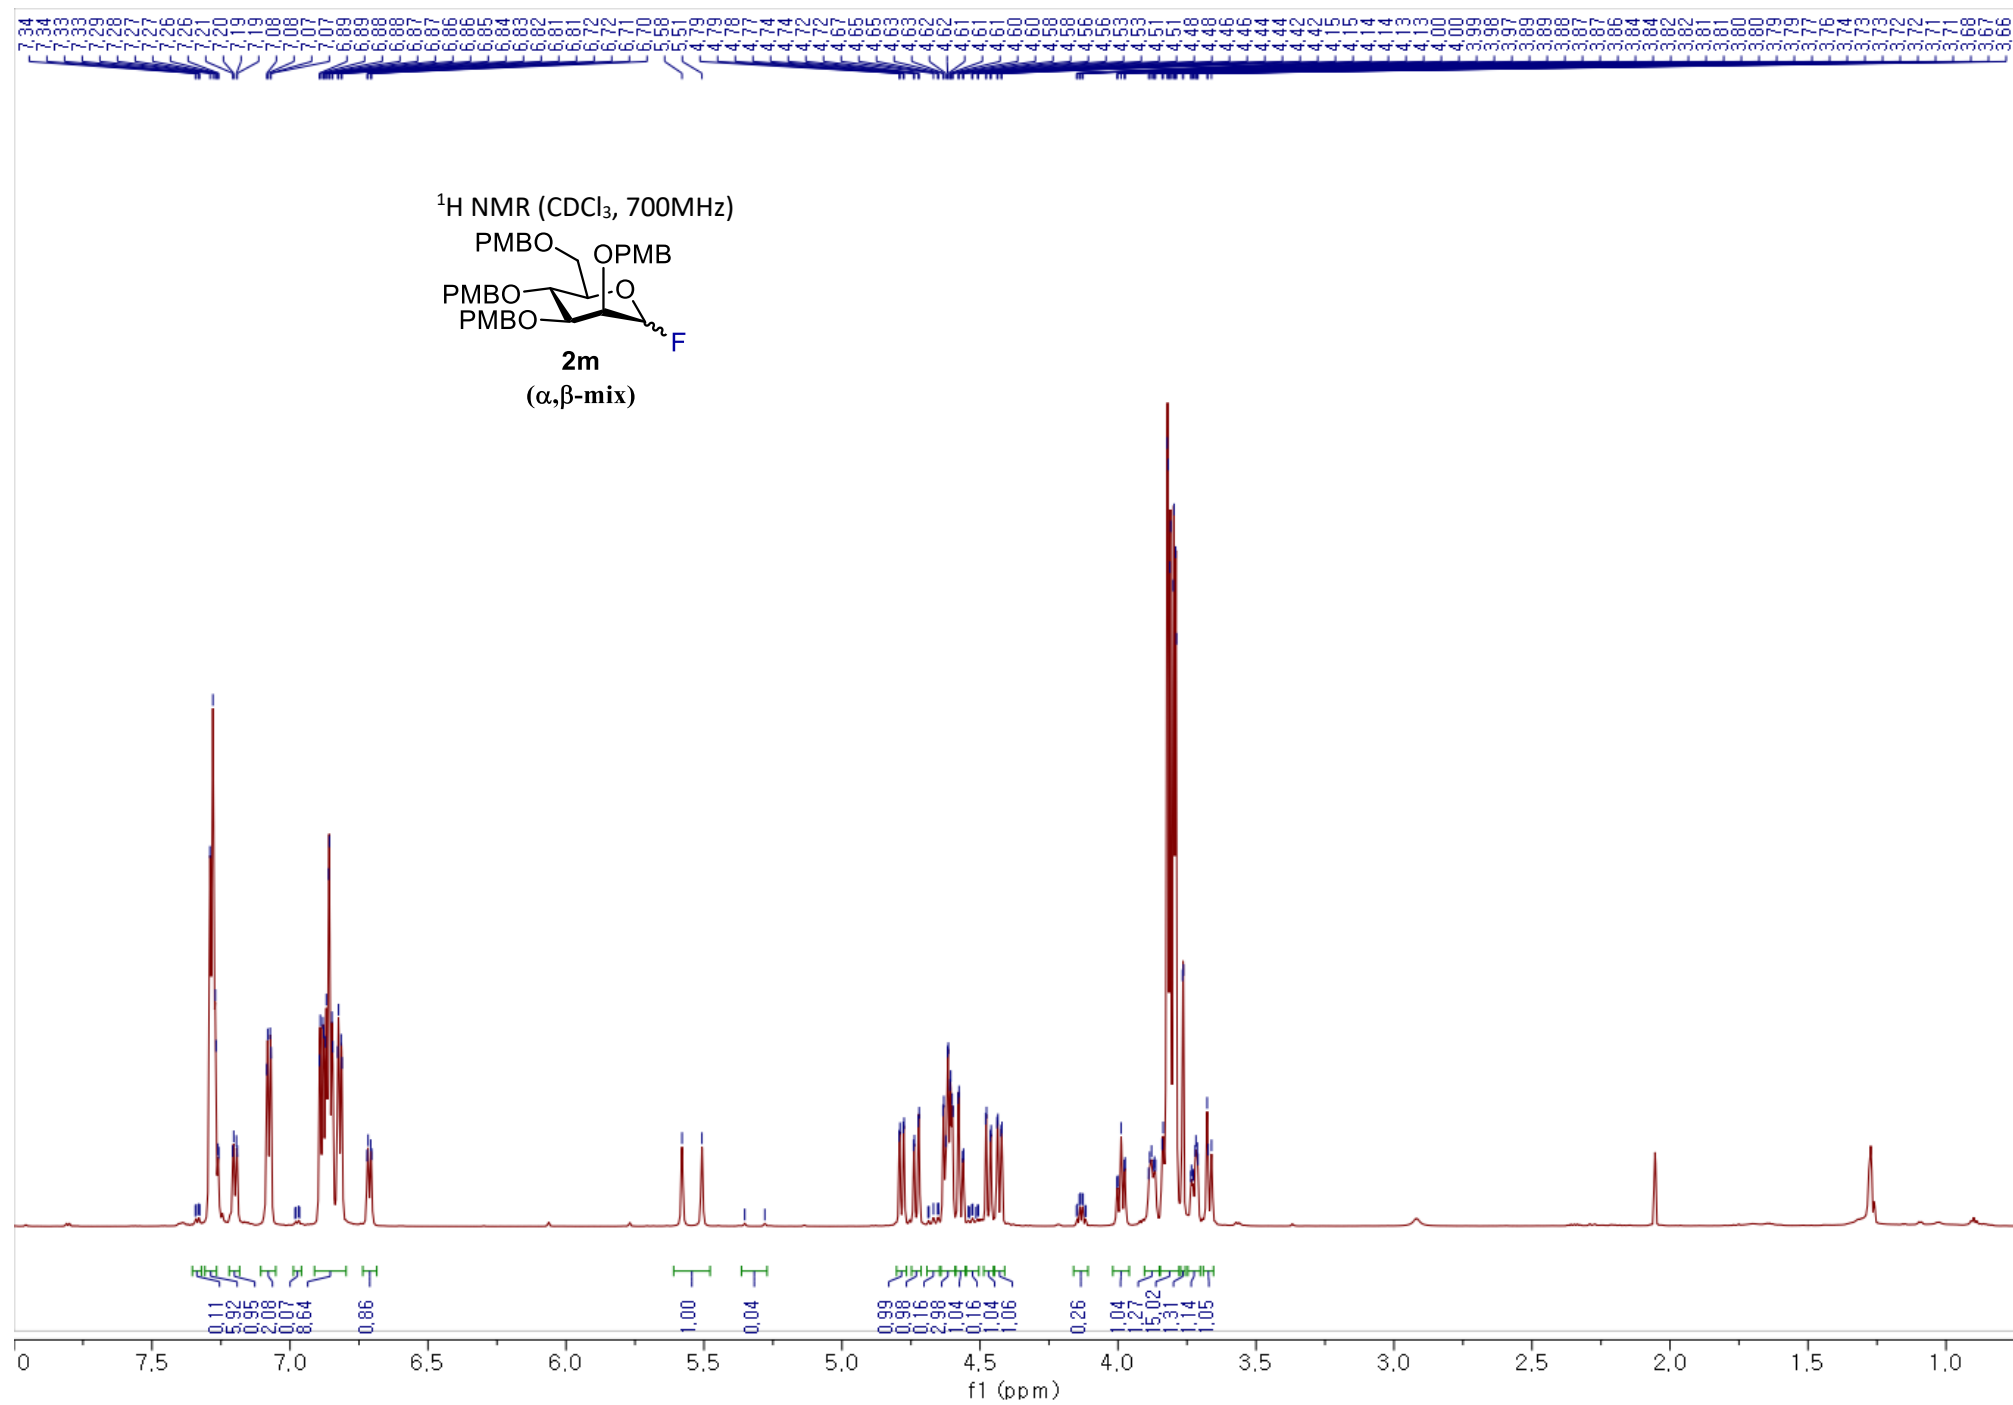

2,3,4,6-Tetrakis-O-[(4-methoxyphenyl)methyl]- $\beta$ -D-galactopyranosyl fluoride (2n- $\beta$ , Major diastereomer)

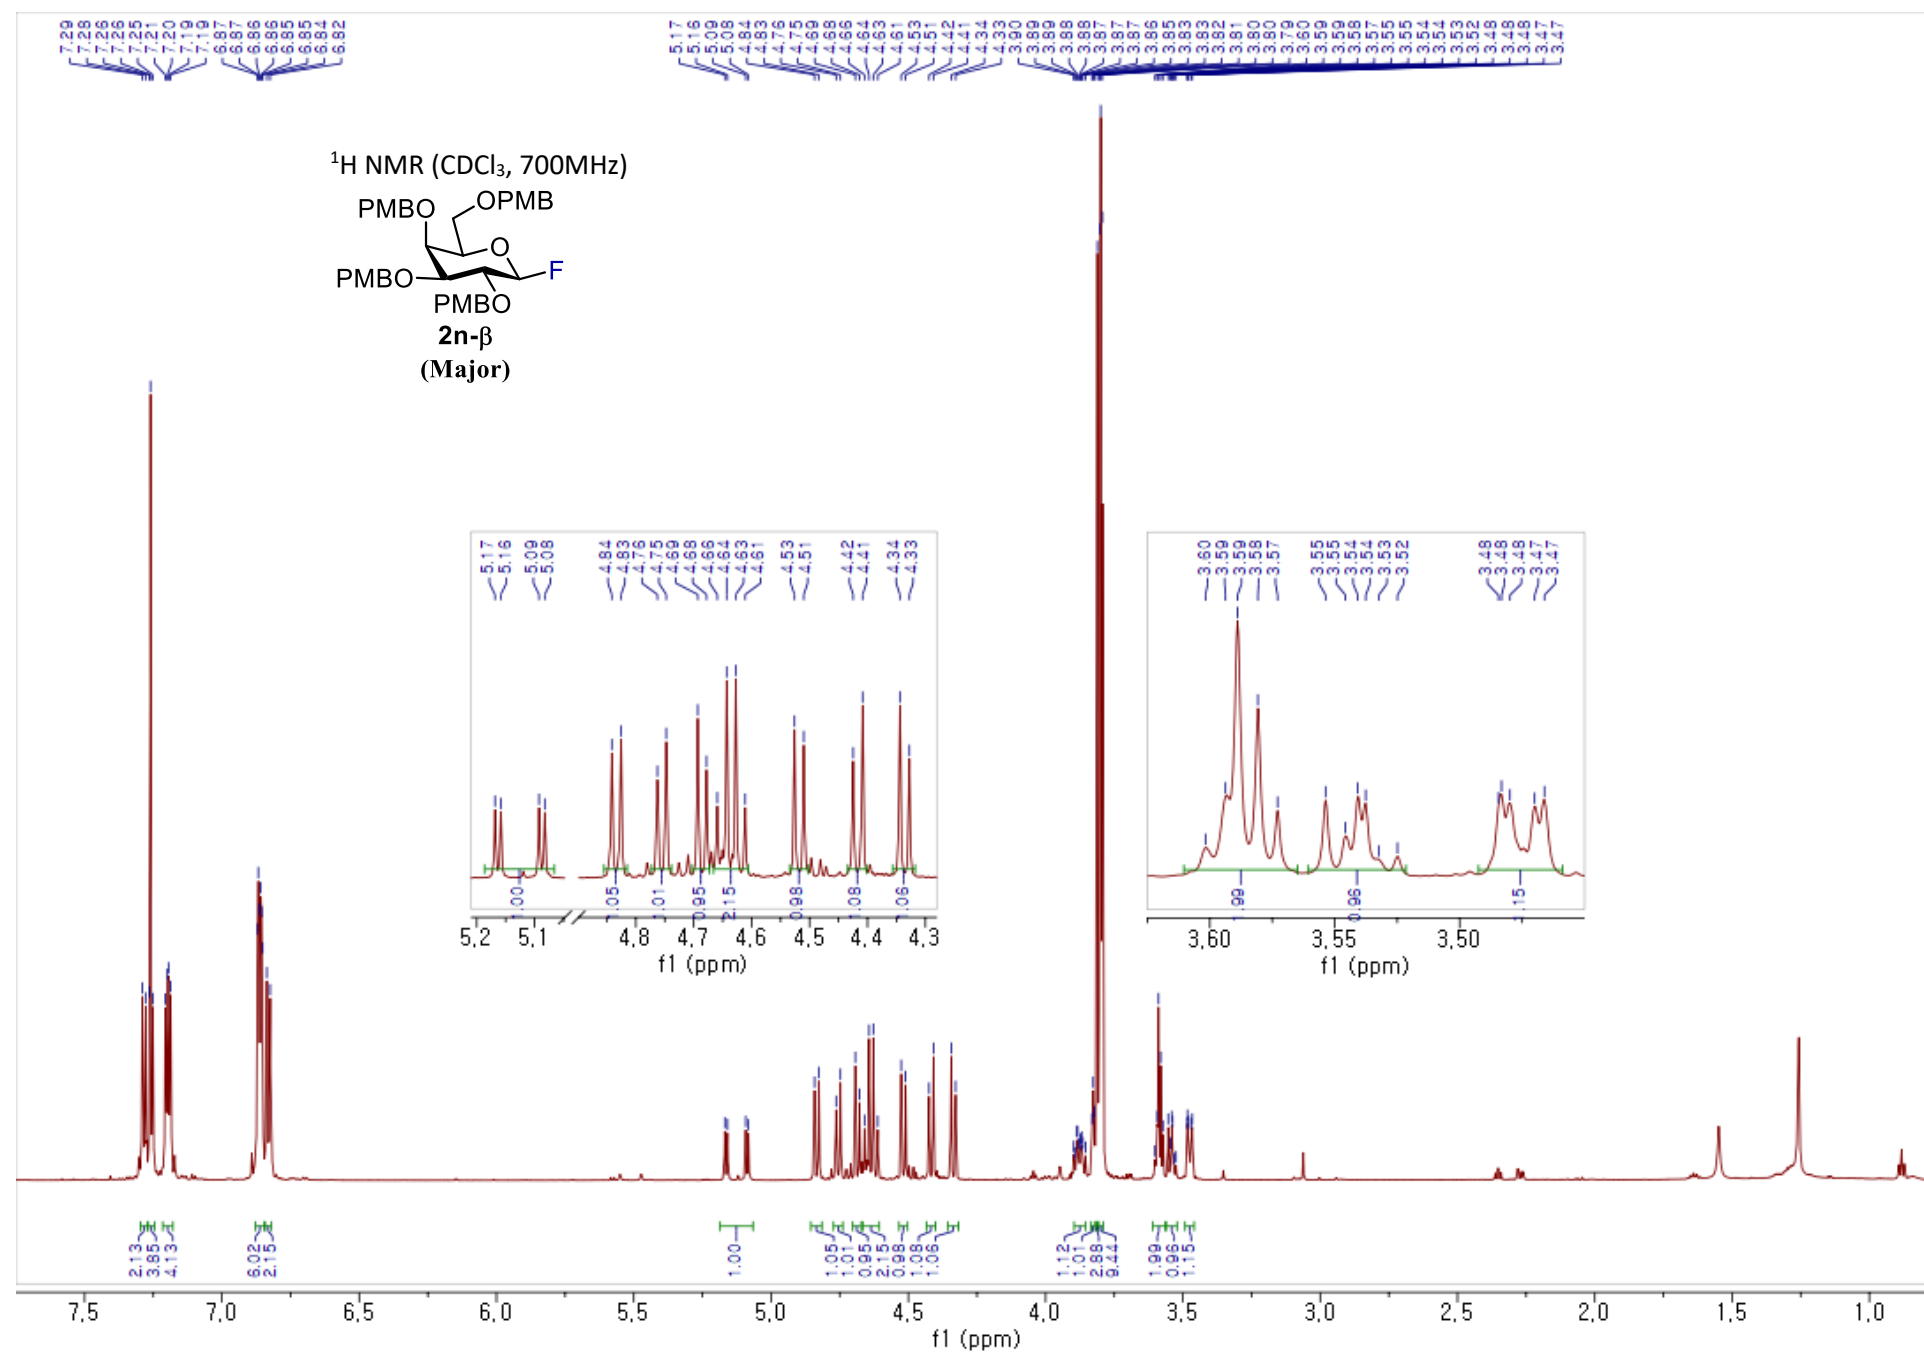

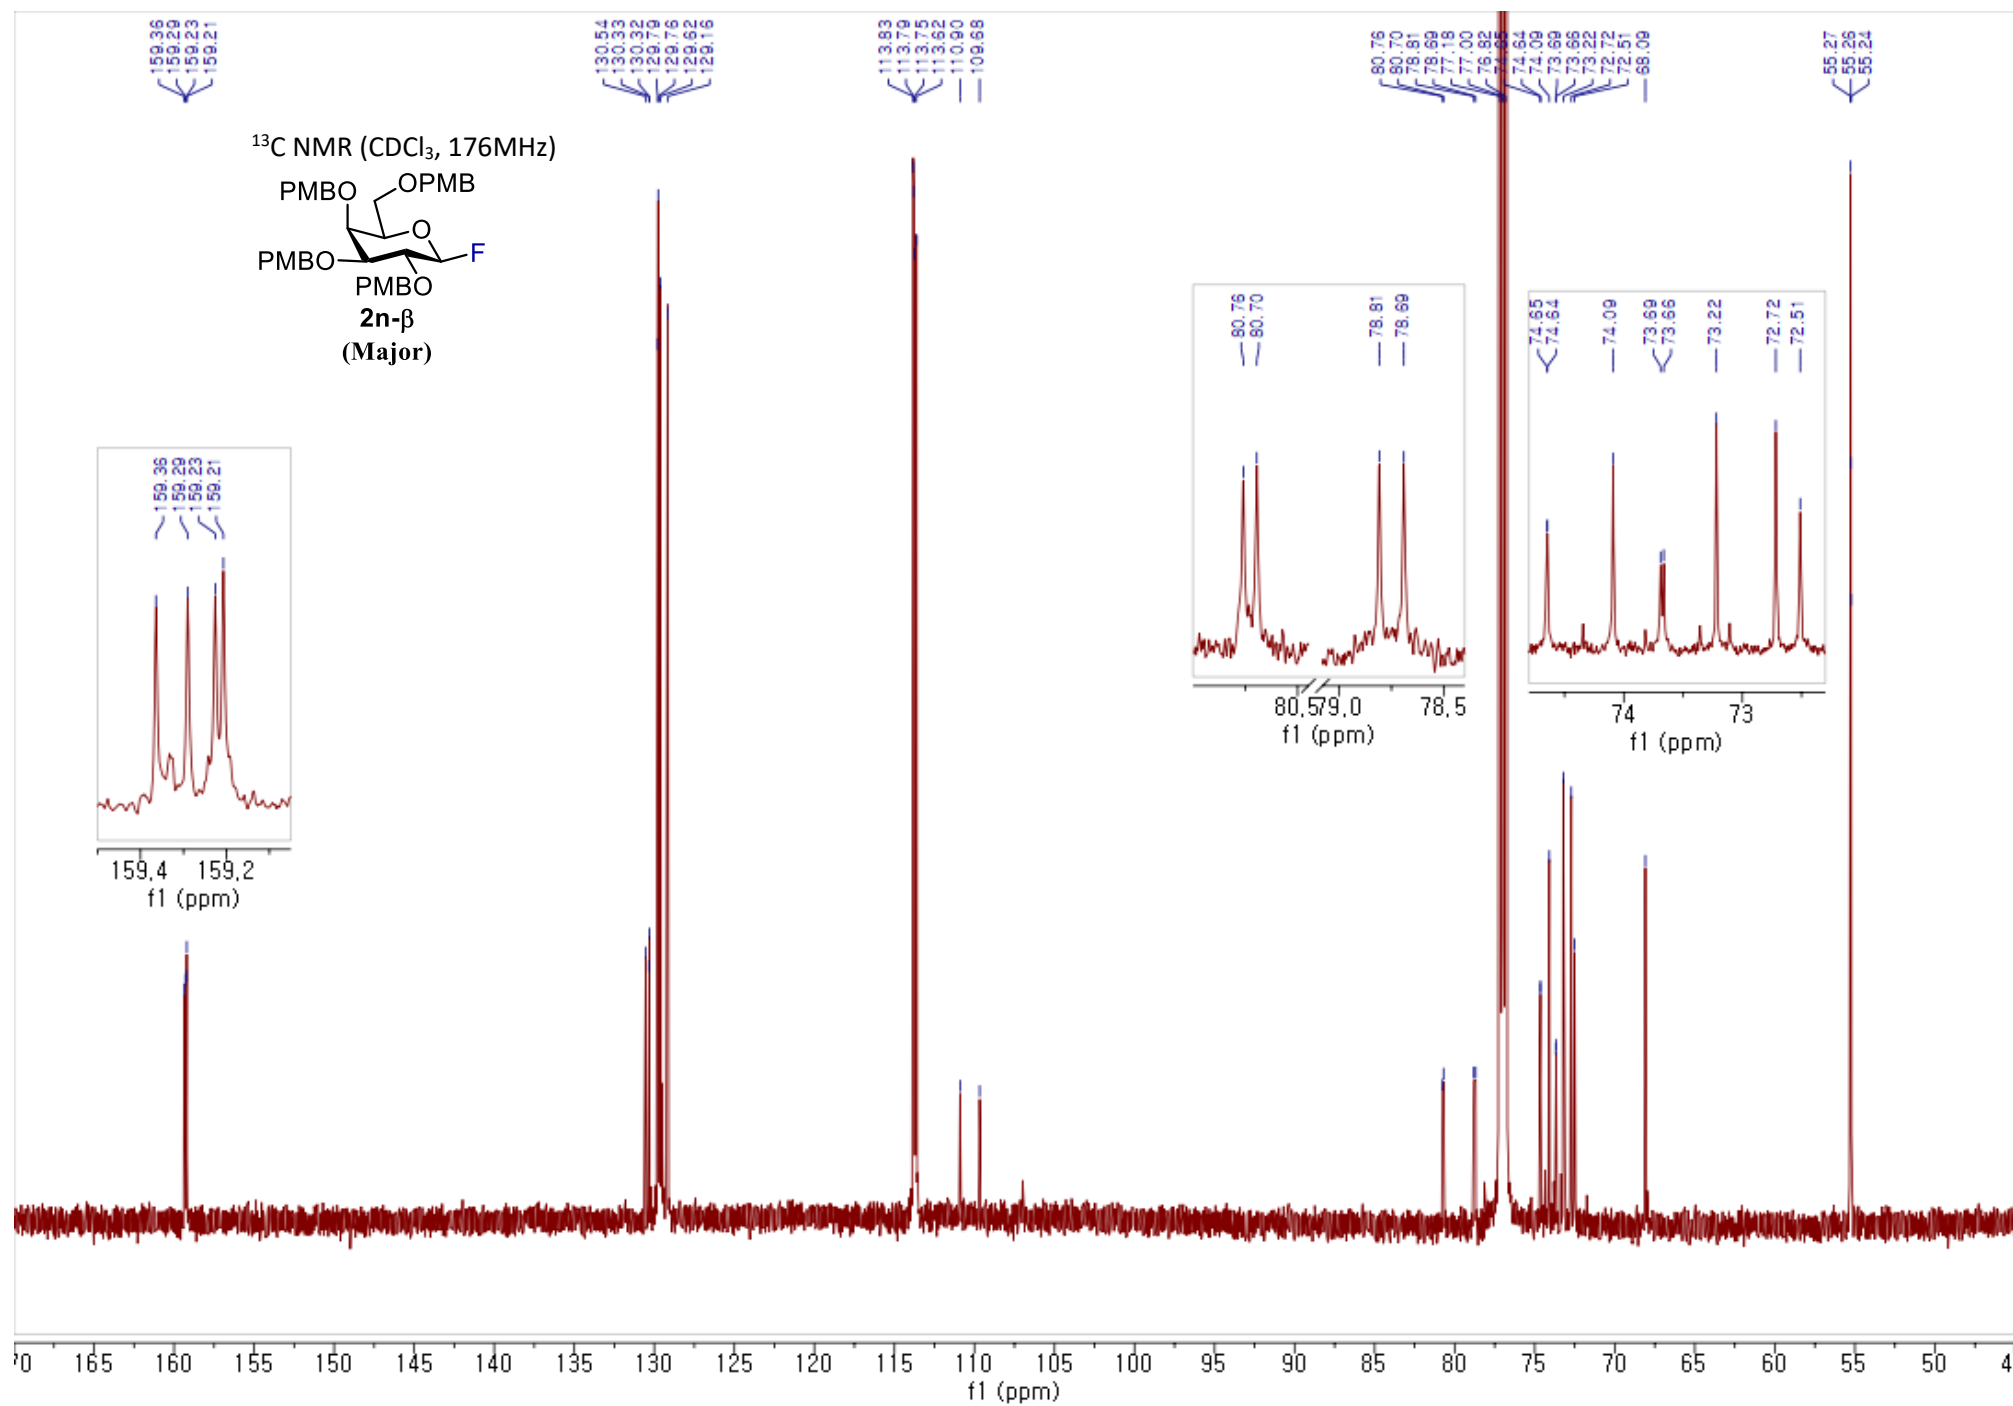

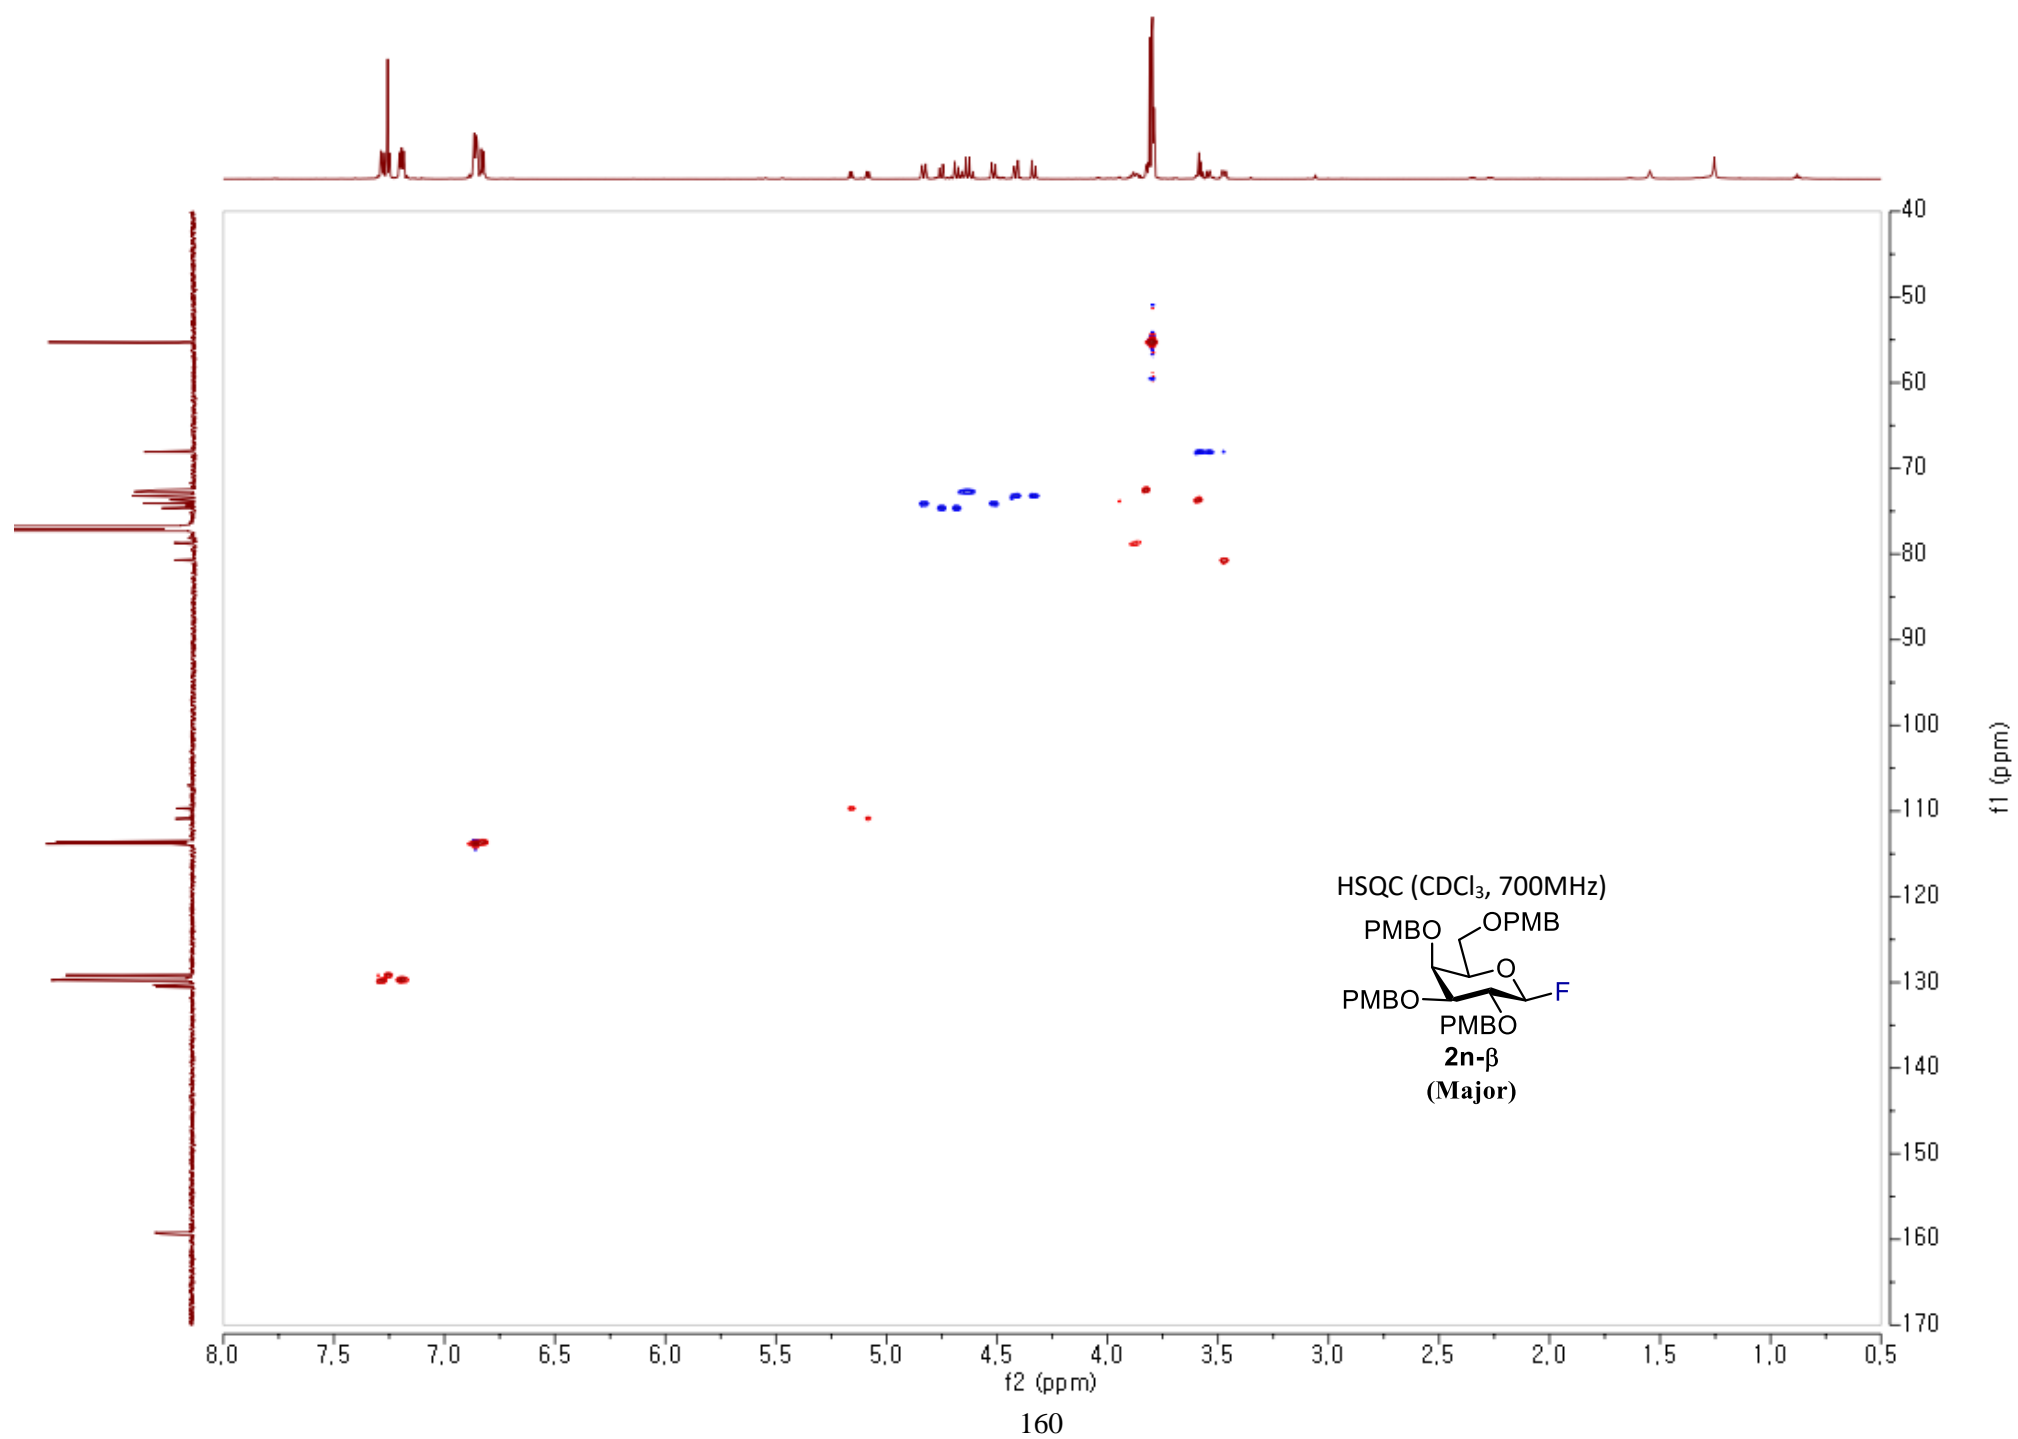

2,3,4,6-Tetrakis-*O*-[(4-methoxyphenyl)methyl]- $\alpha$ -D-galactopyranosyl fluoride (2n- $\alpha$ , Minor diastereomer)

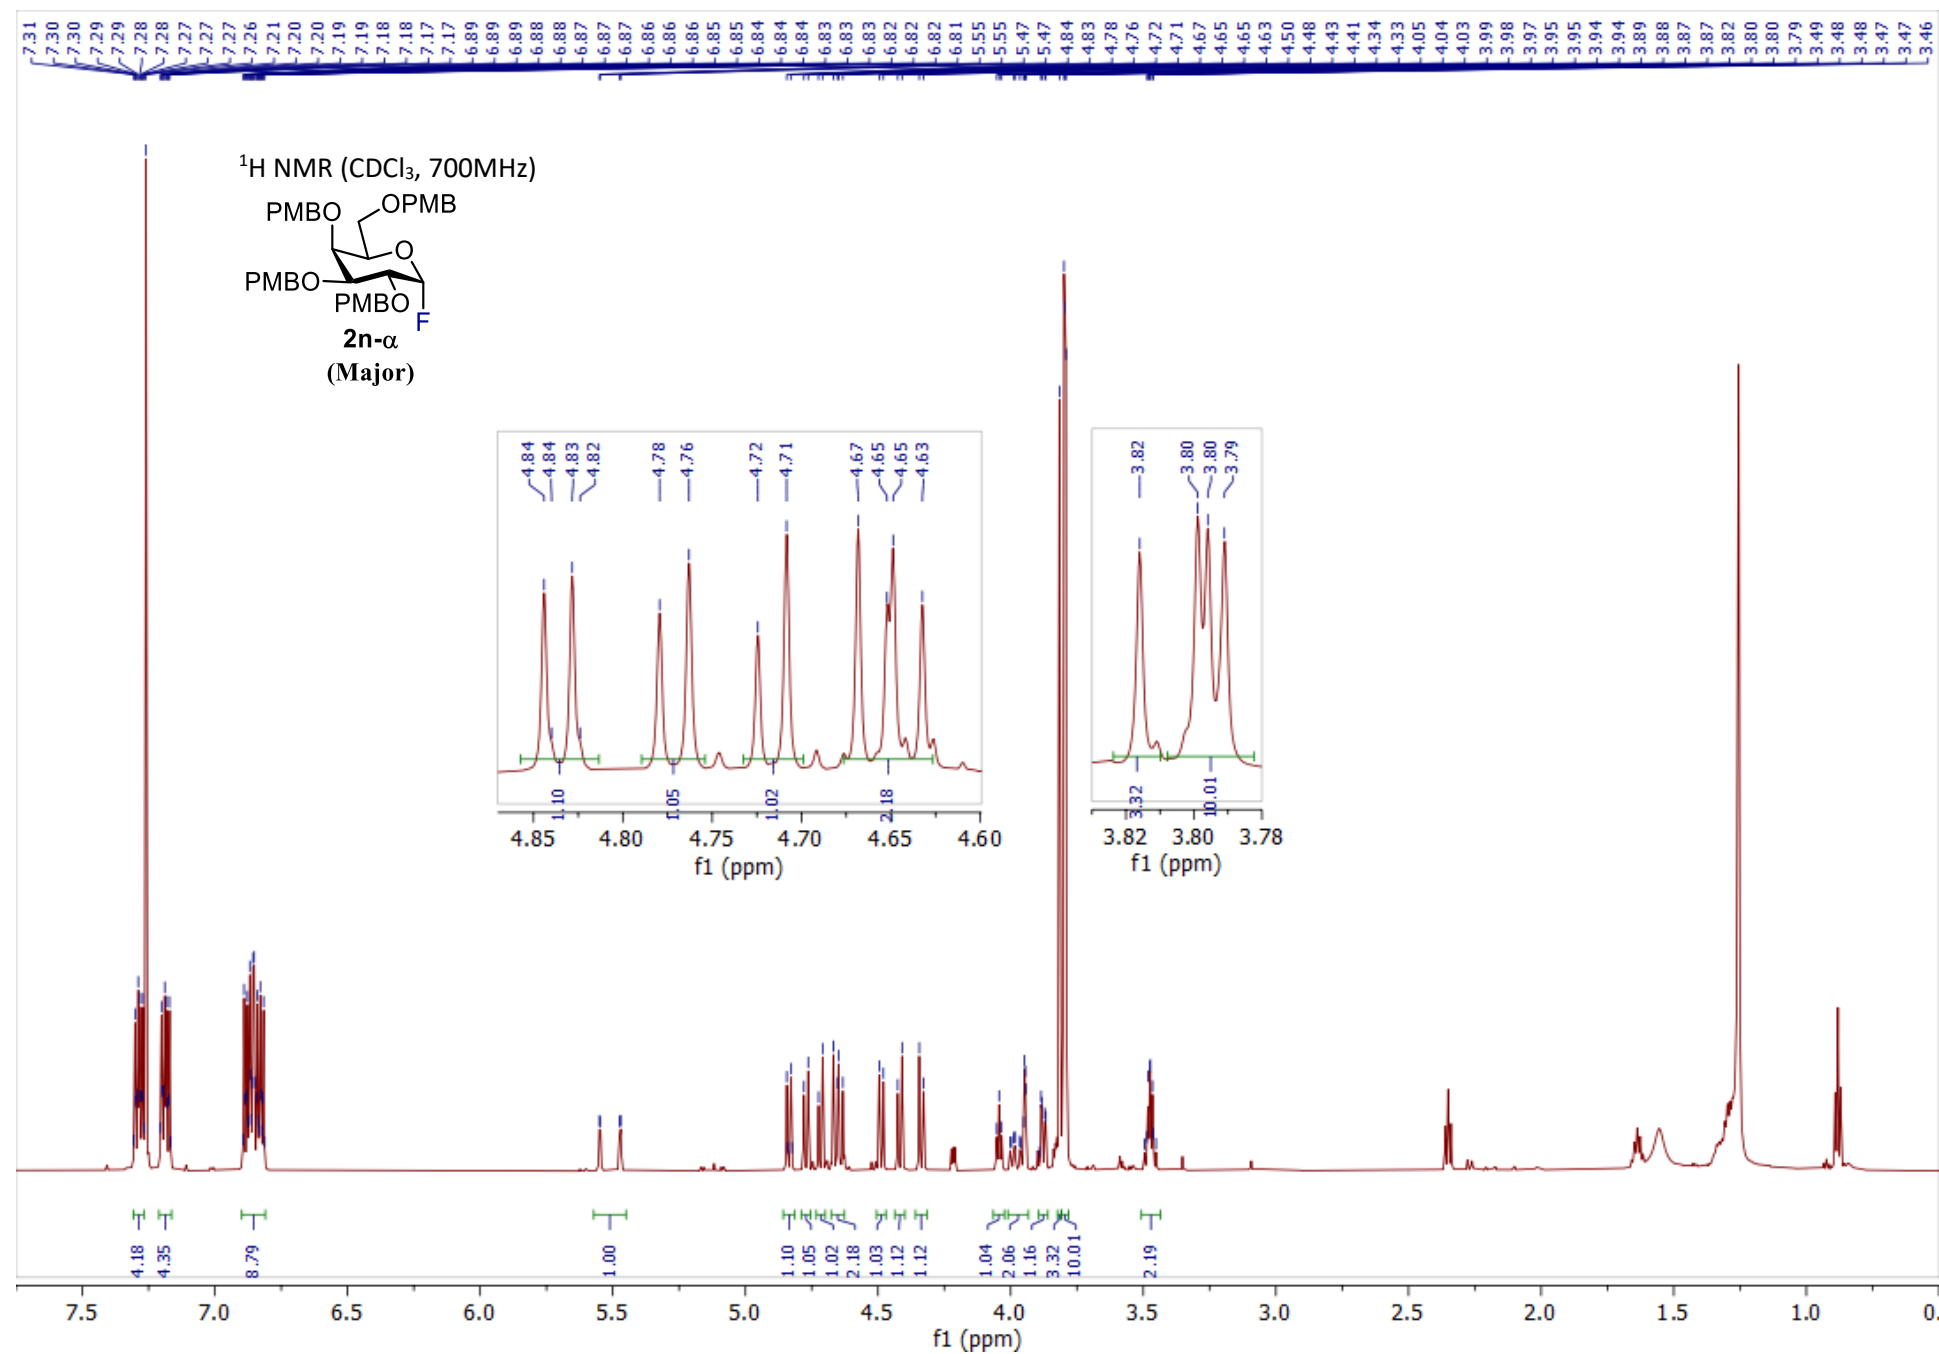

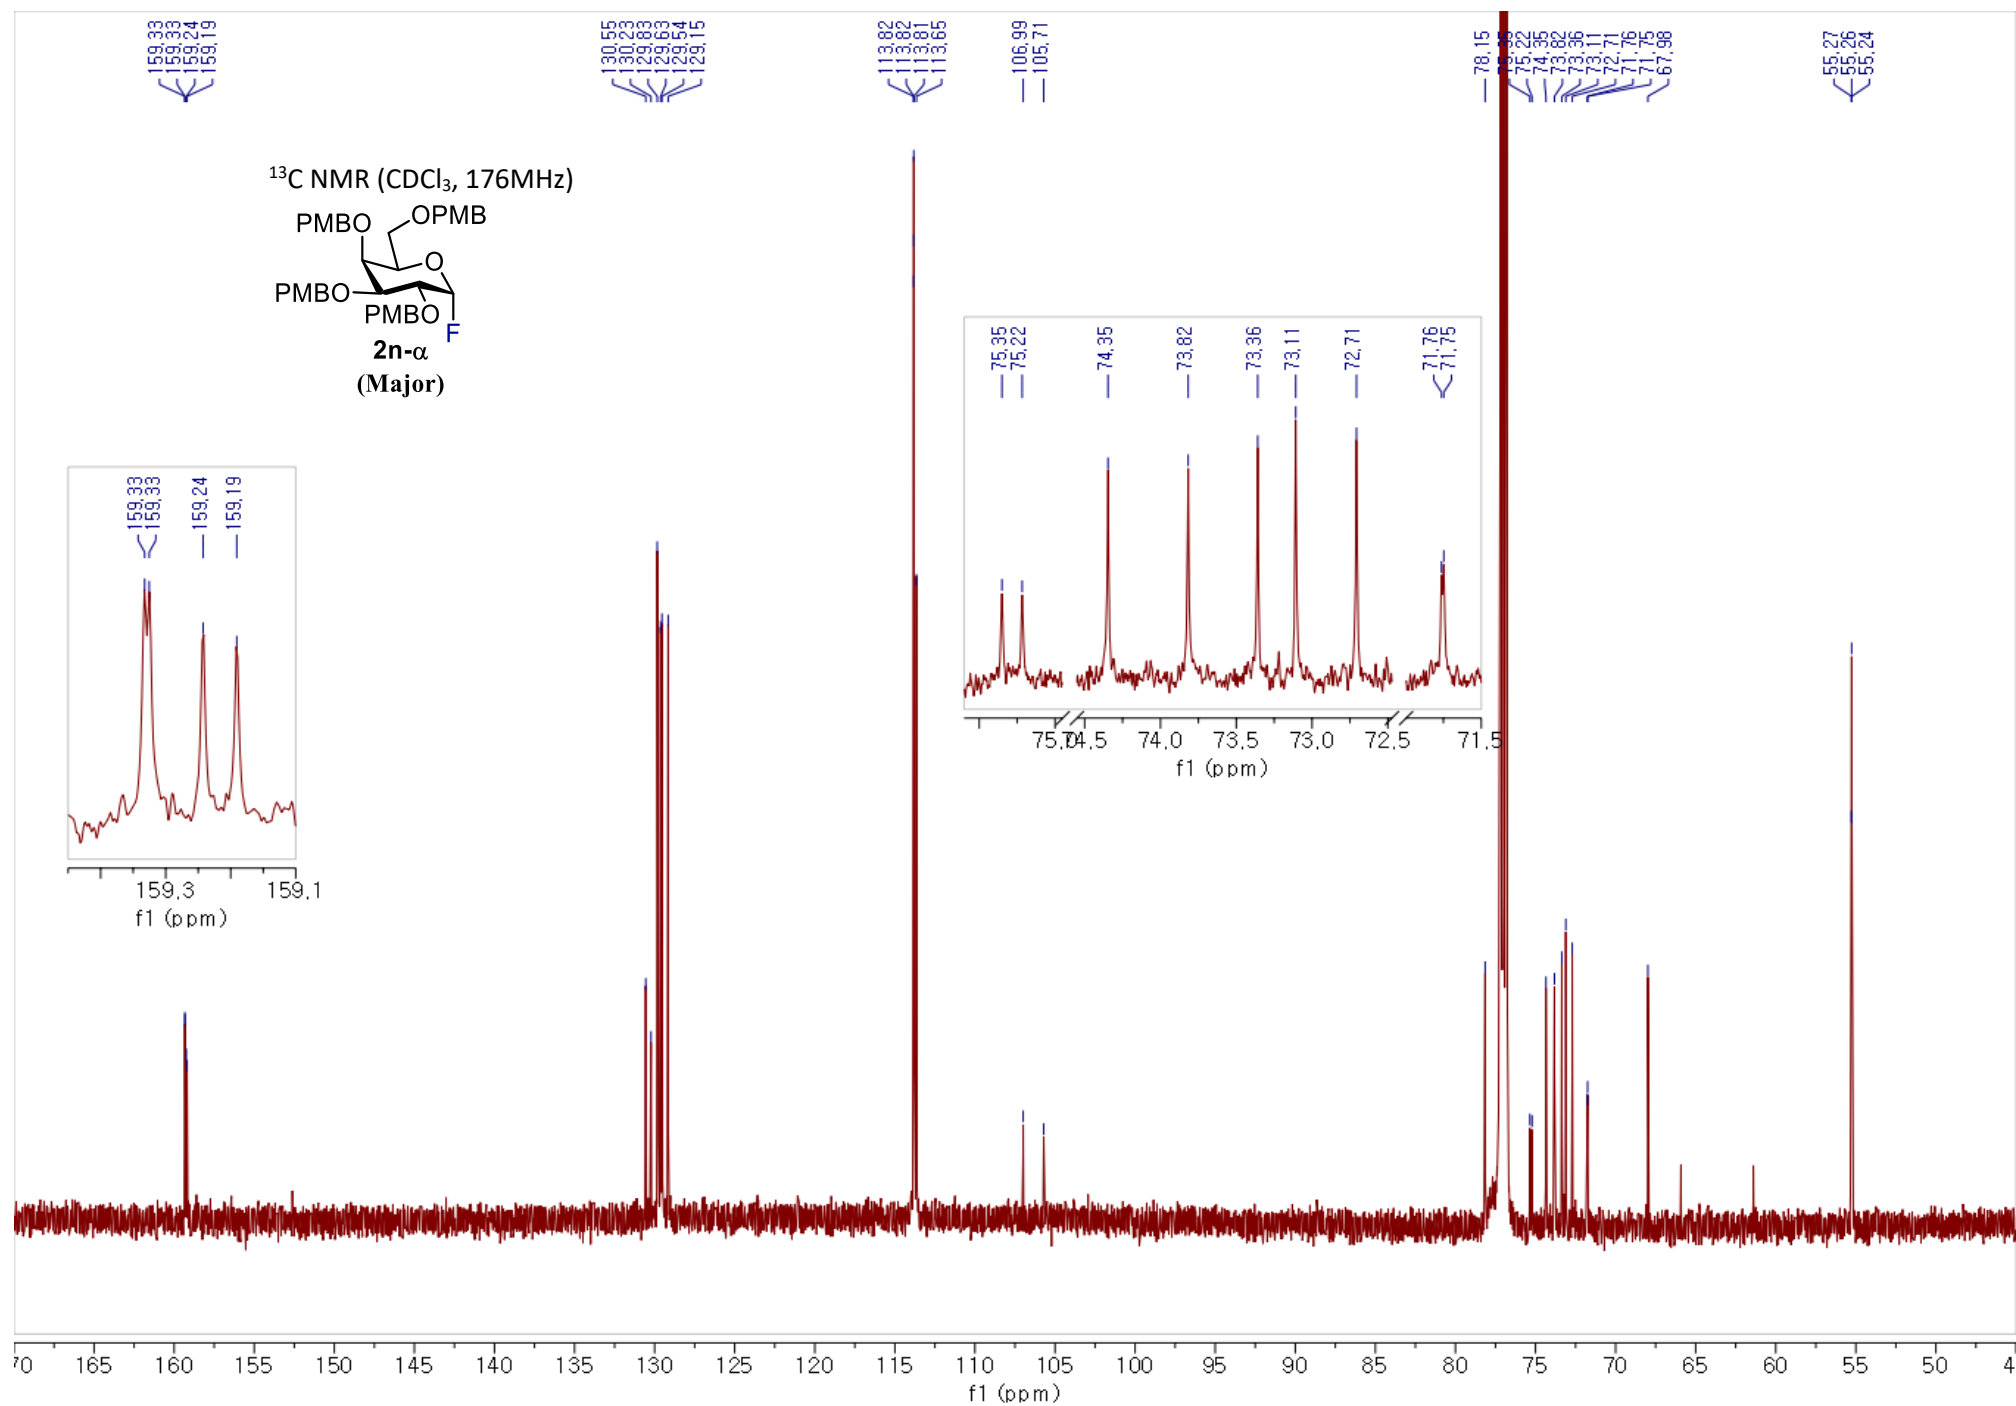

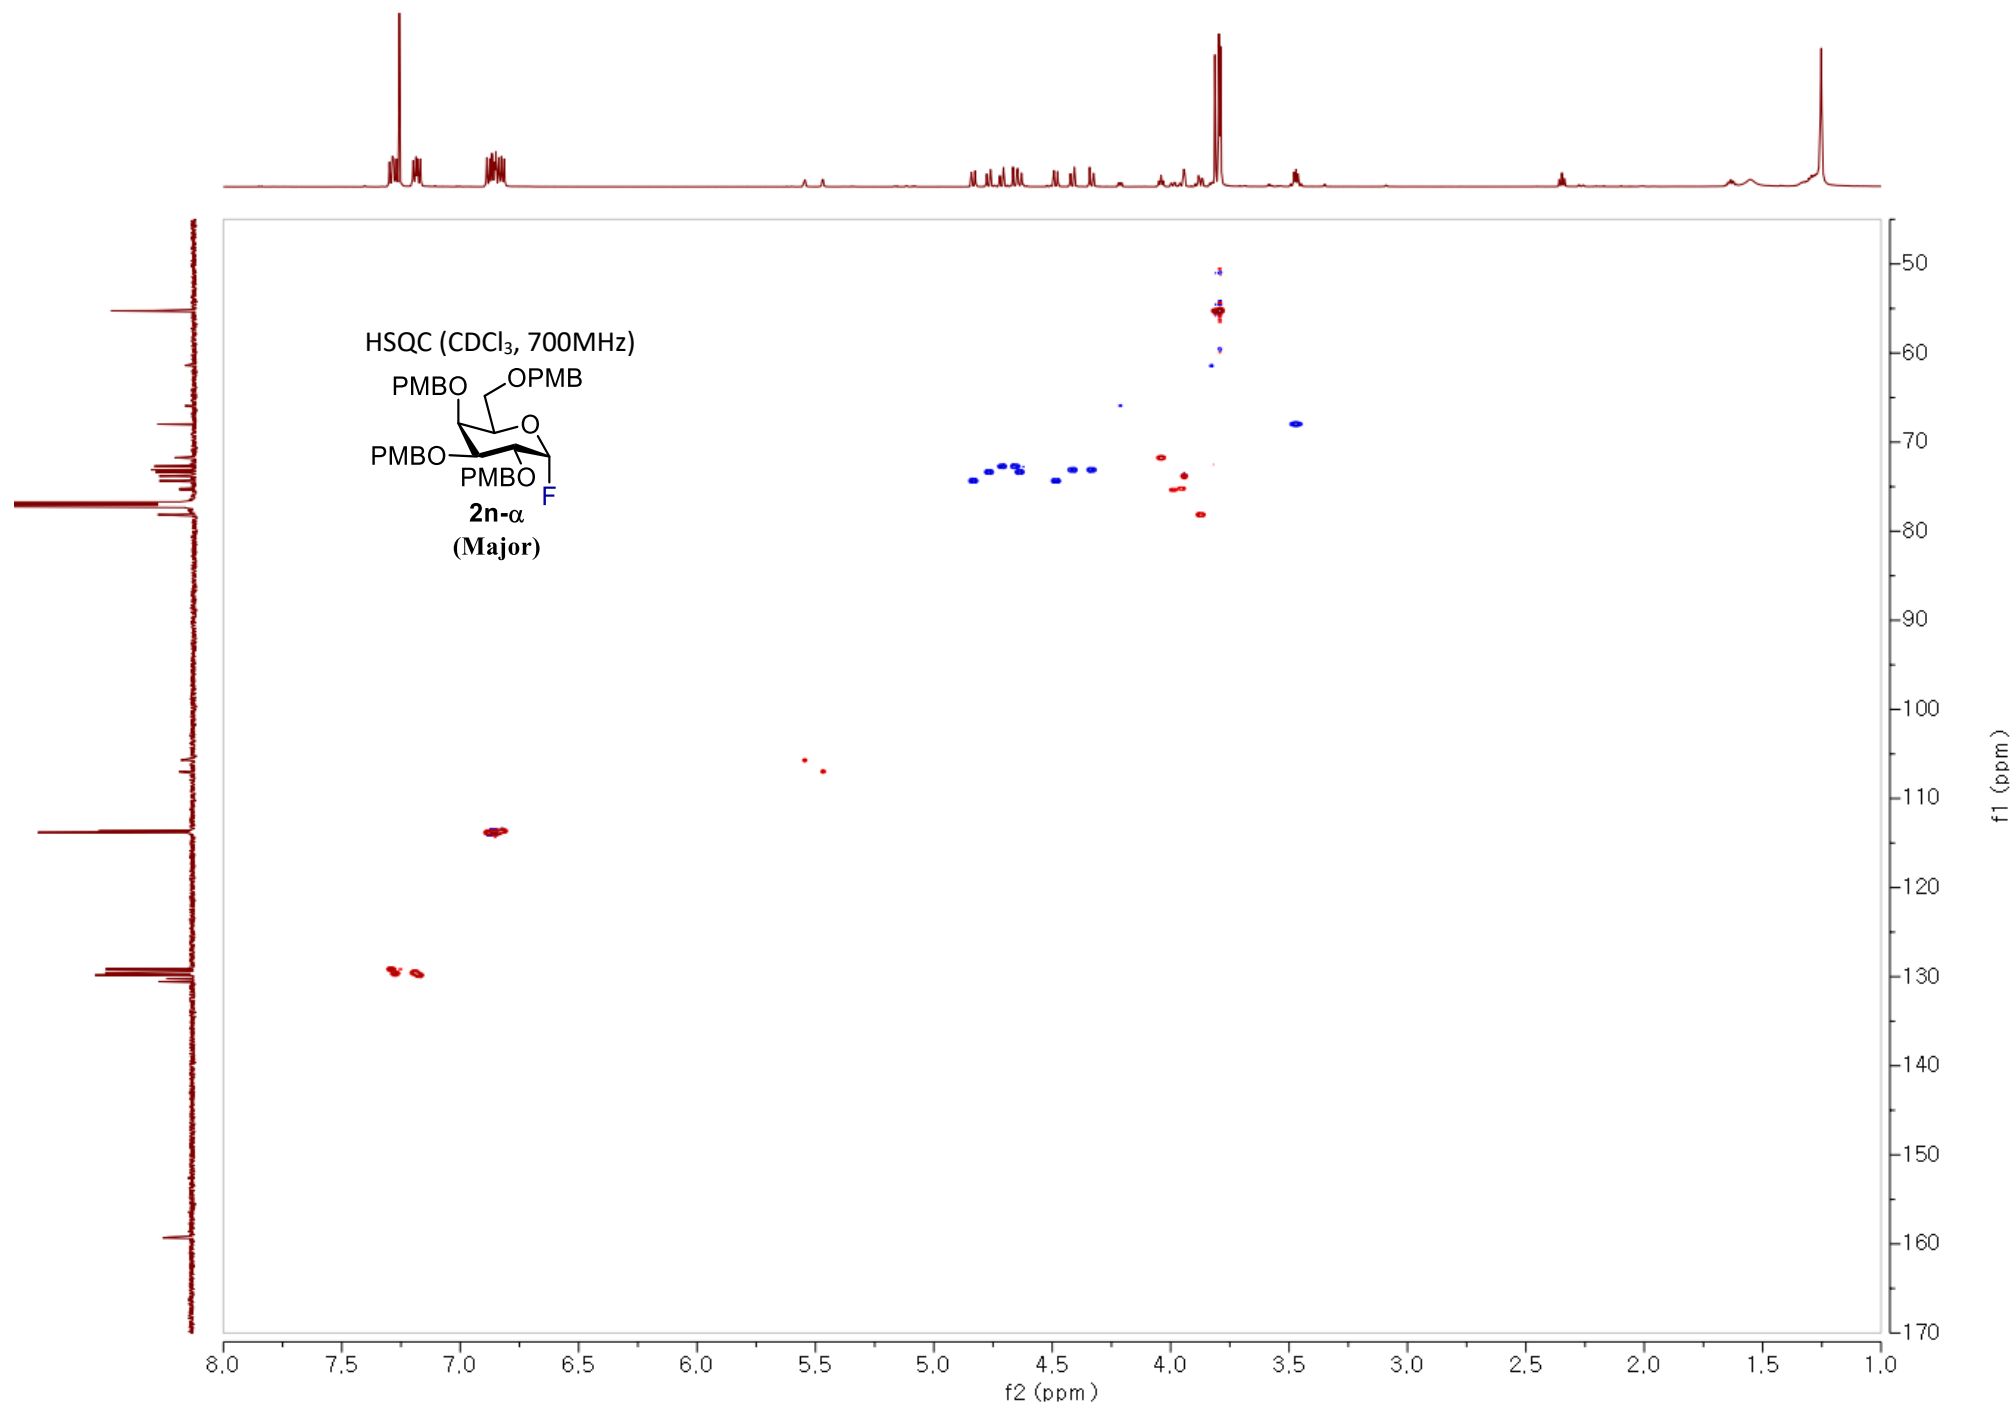

$^{19}\text{F}$  NMR ( $\text{CDCl}_3$ , 376MHz)

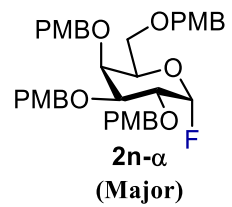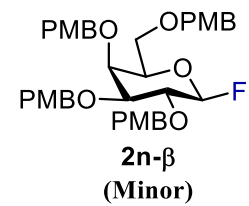

138.89  
138.82  
138.80  
138.79

150.03  
150.00  
150.00  
150.00

2.38

1.00

34 -135 -136 -137 -138 -139 -140 -141 -142 -143 -144 -145 -146 -147 -148 -149 -150 -151 -152 -153 -154 -1

f1 (ppm)

**2,3,6-Tris-*O*-(phenylmethyl)-4-*O*-[2,3,4,6-tetrakis-*O*-(phenylmethyl)- $\beta$ -D-glucopyranosyl]- $\beta$ -D-glucopyranosyl fluoride (20- $\beta$ , Major diastereomer)**

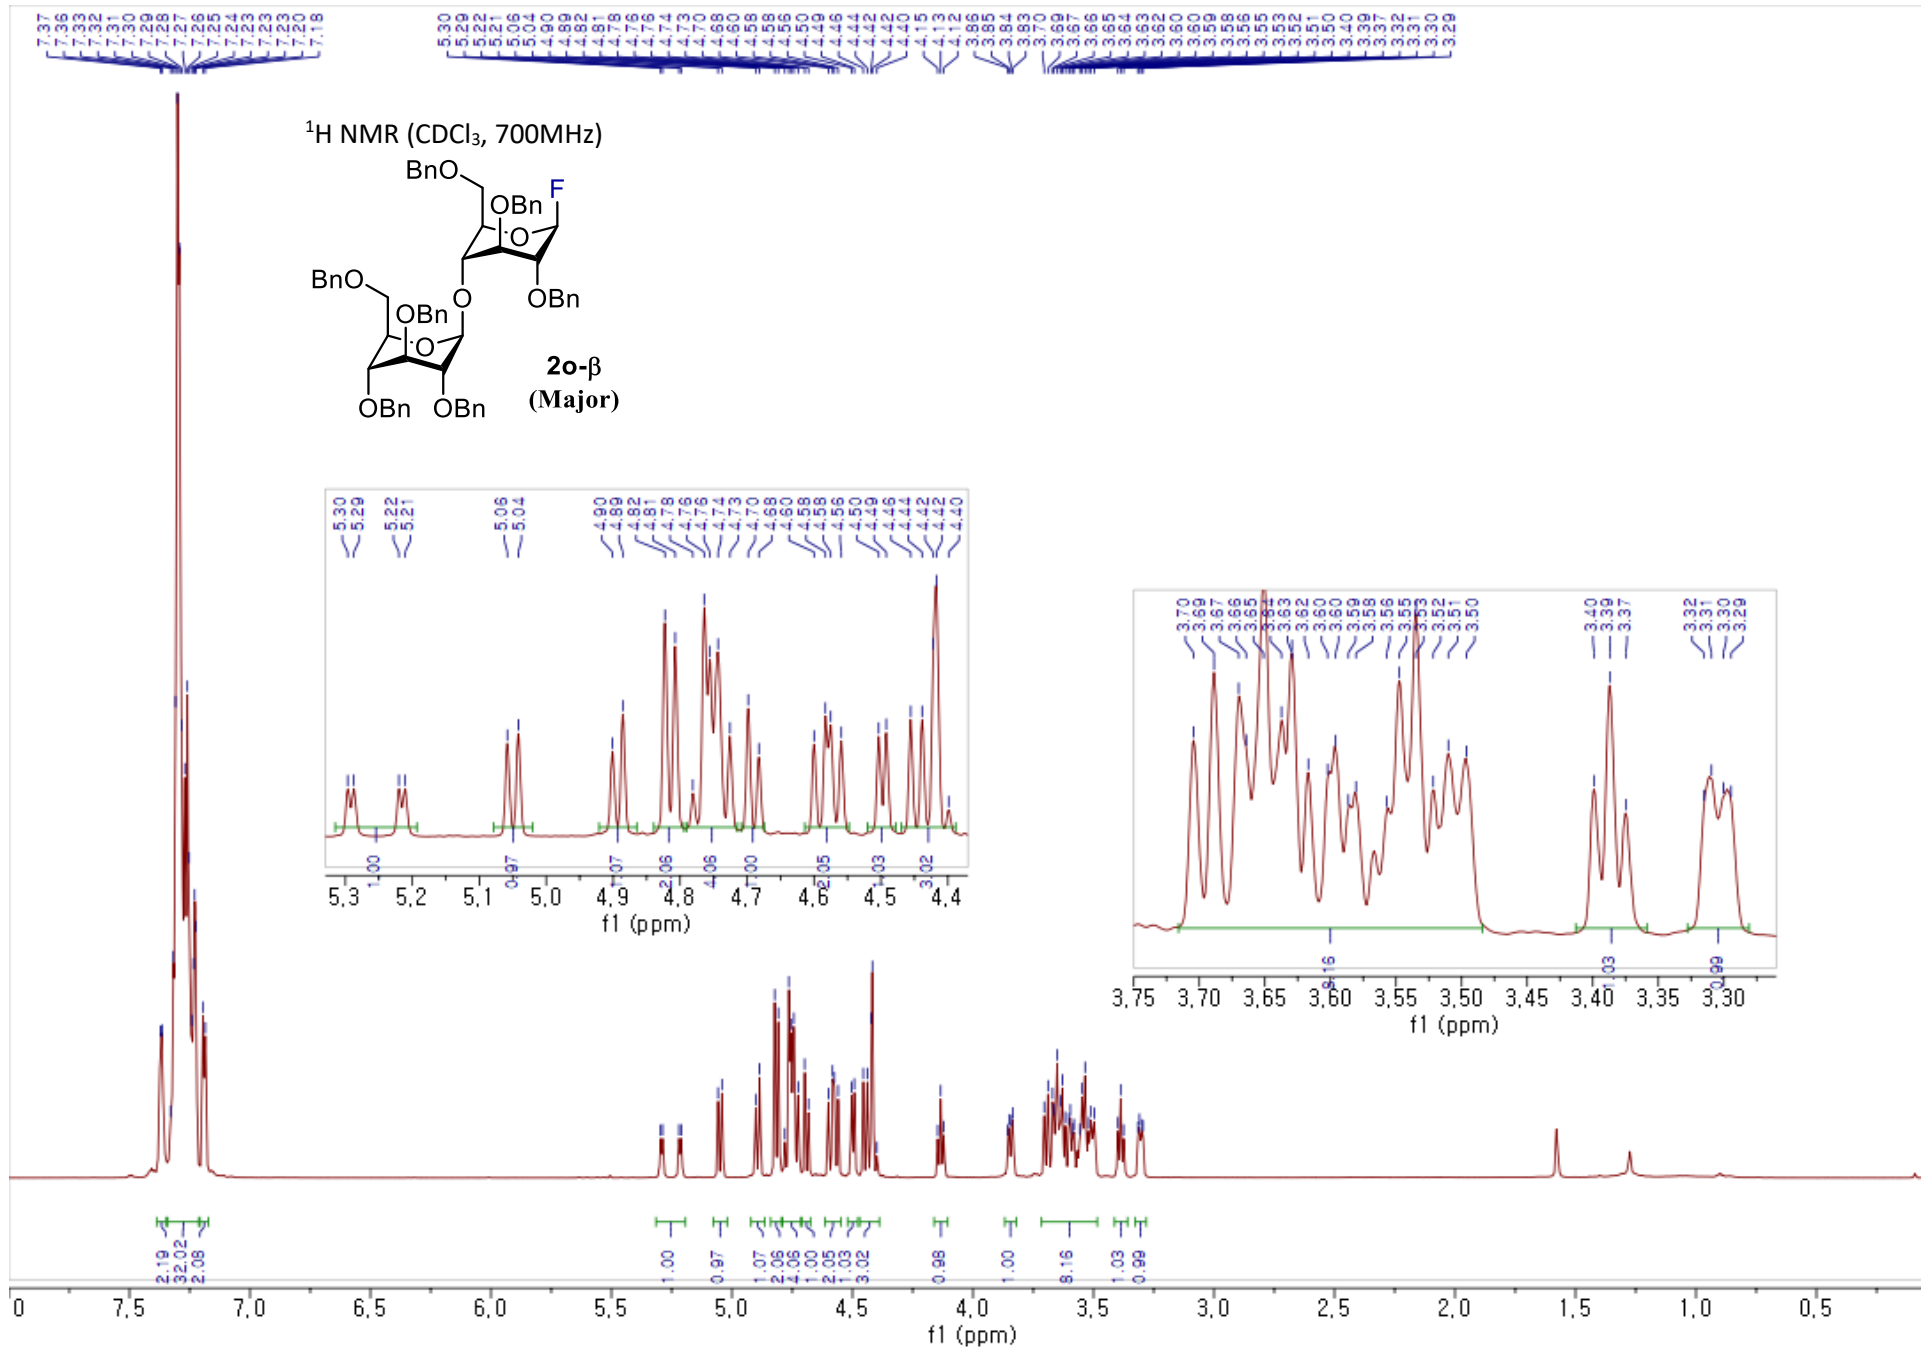

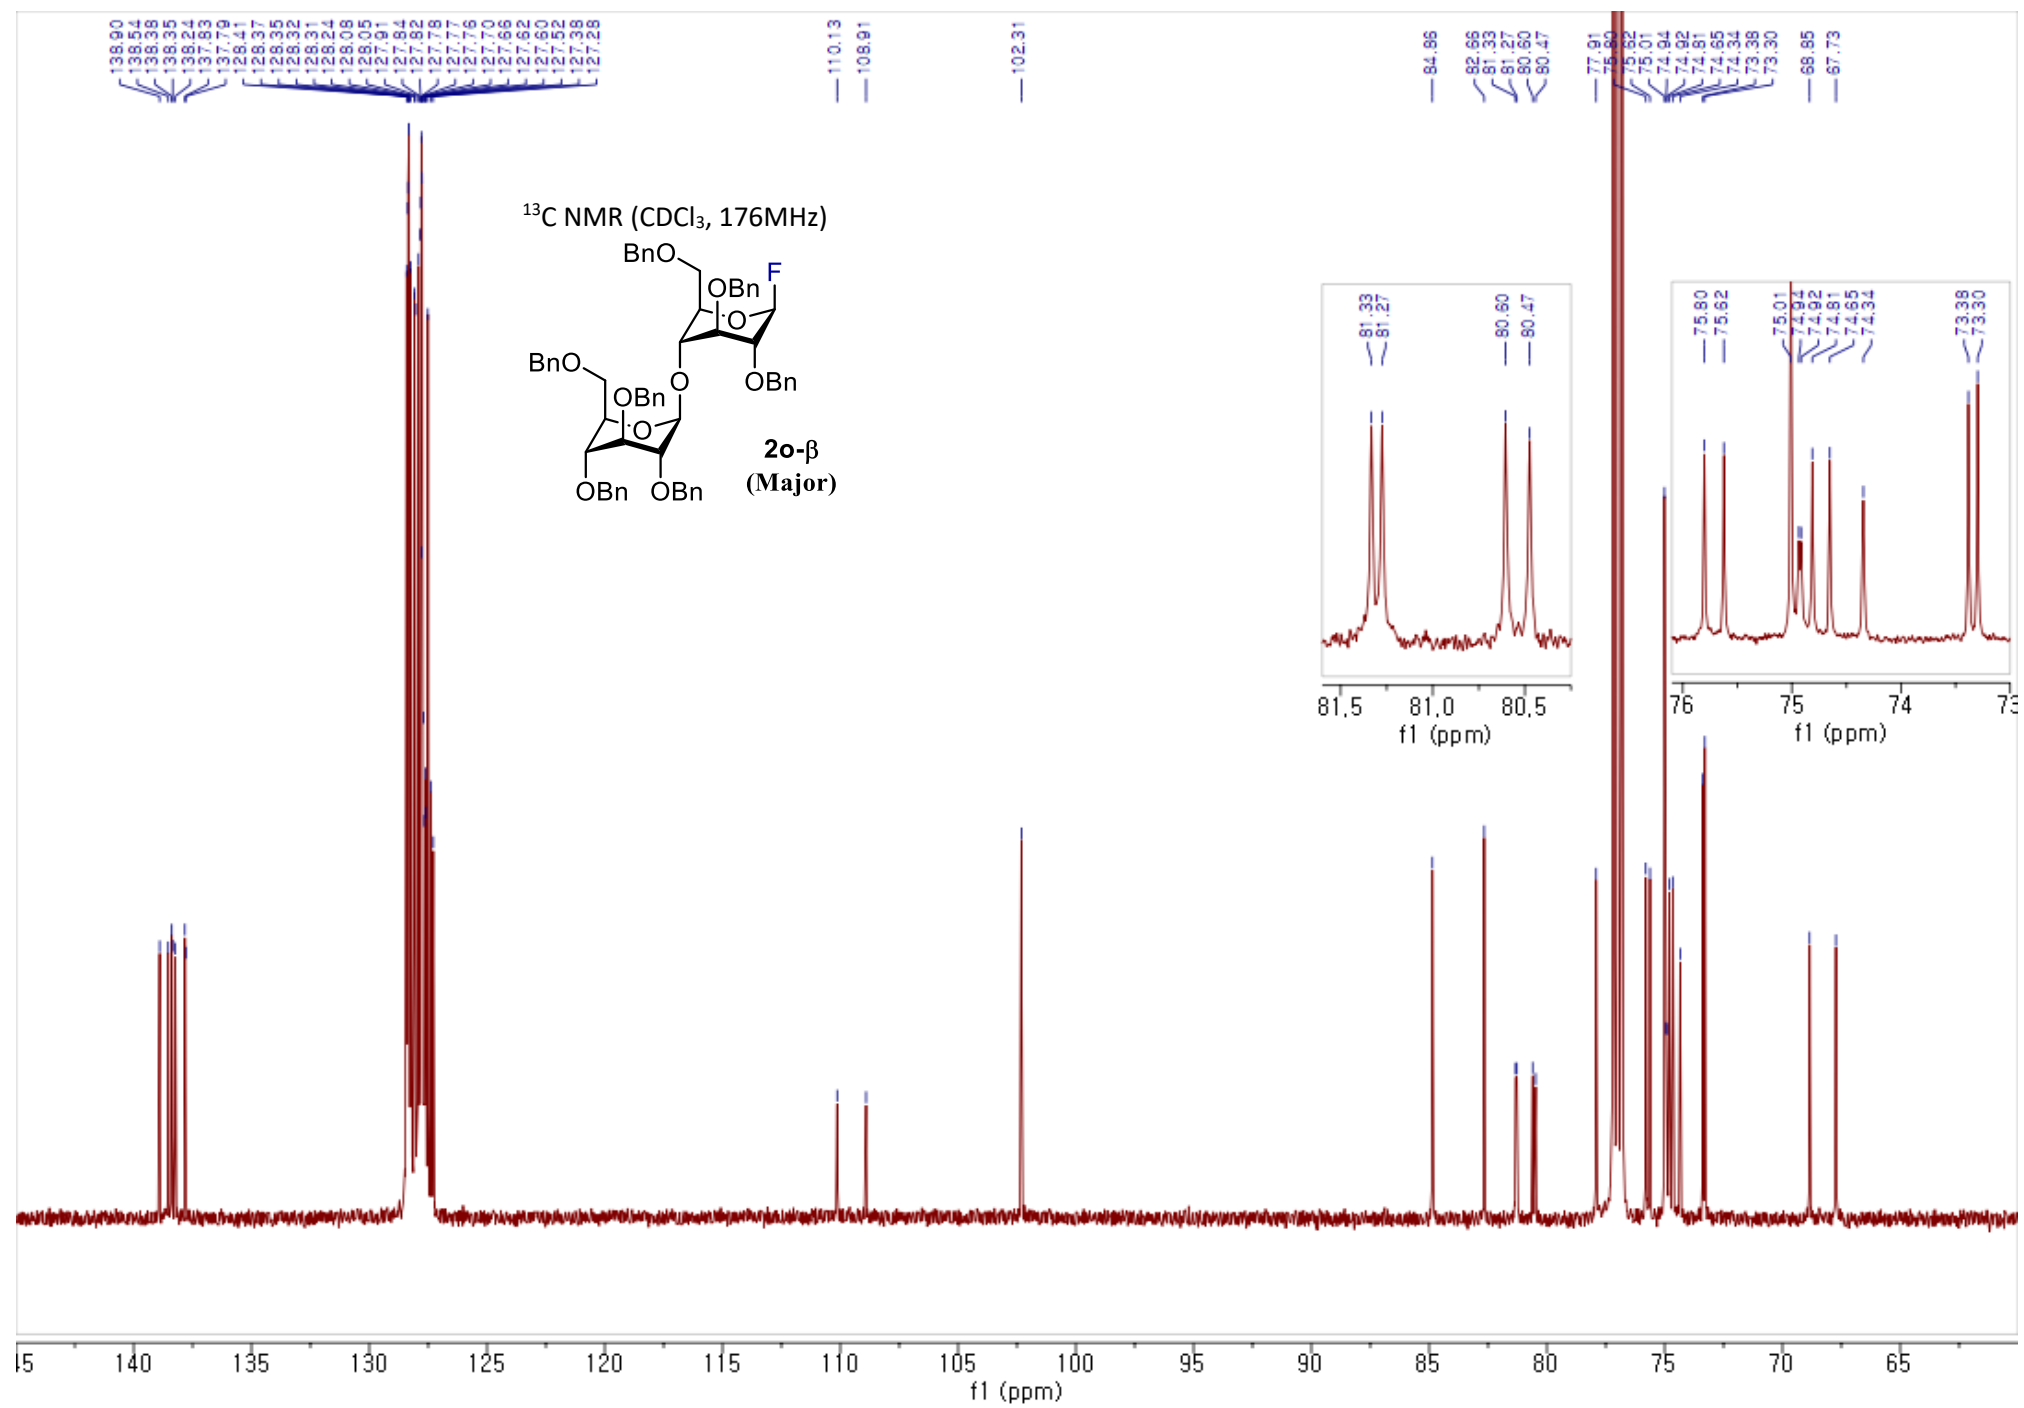

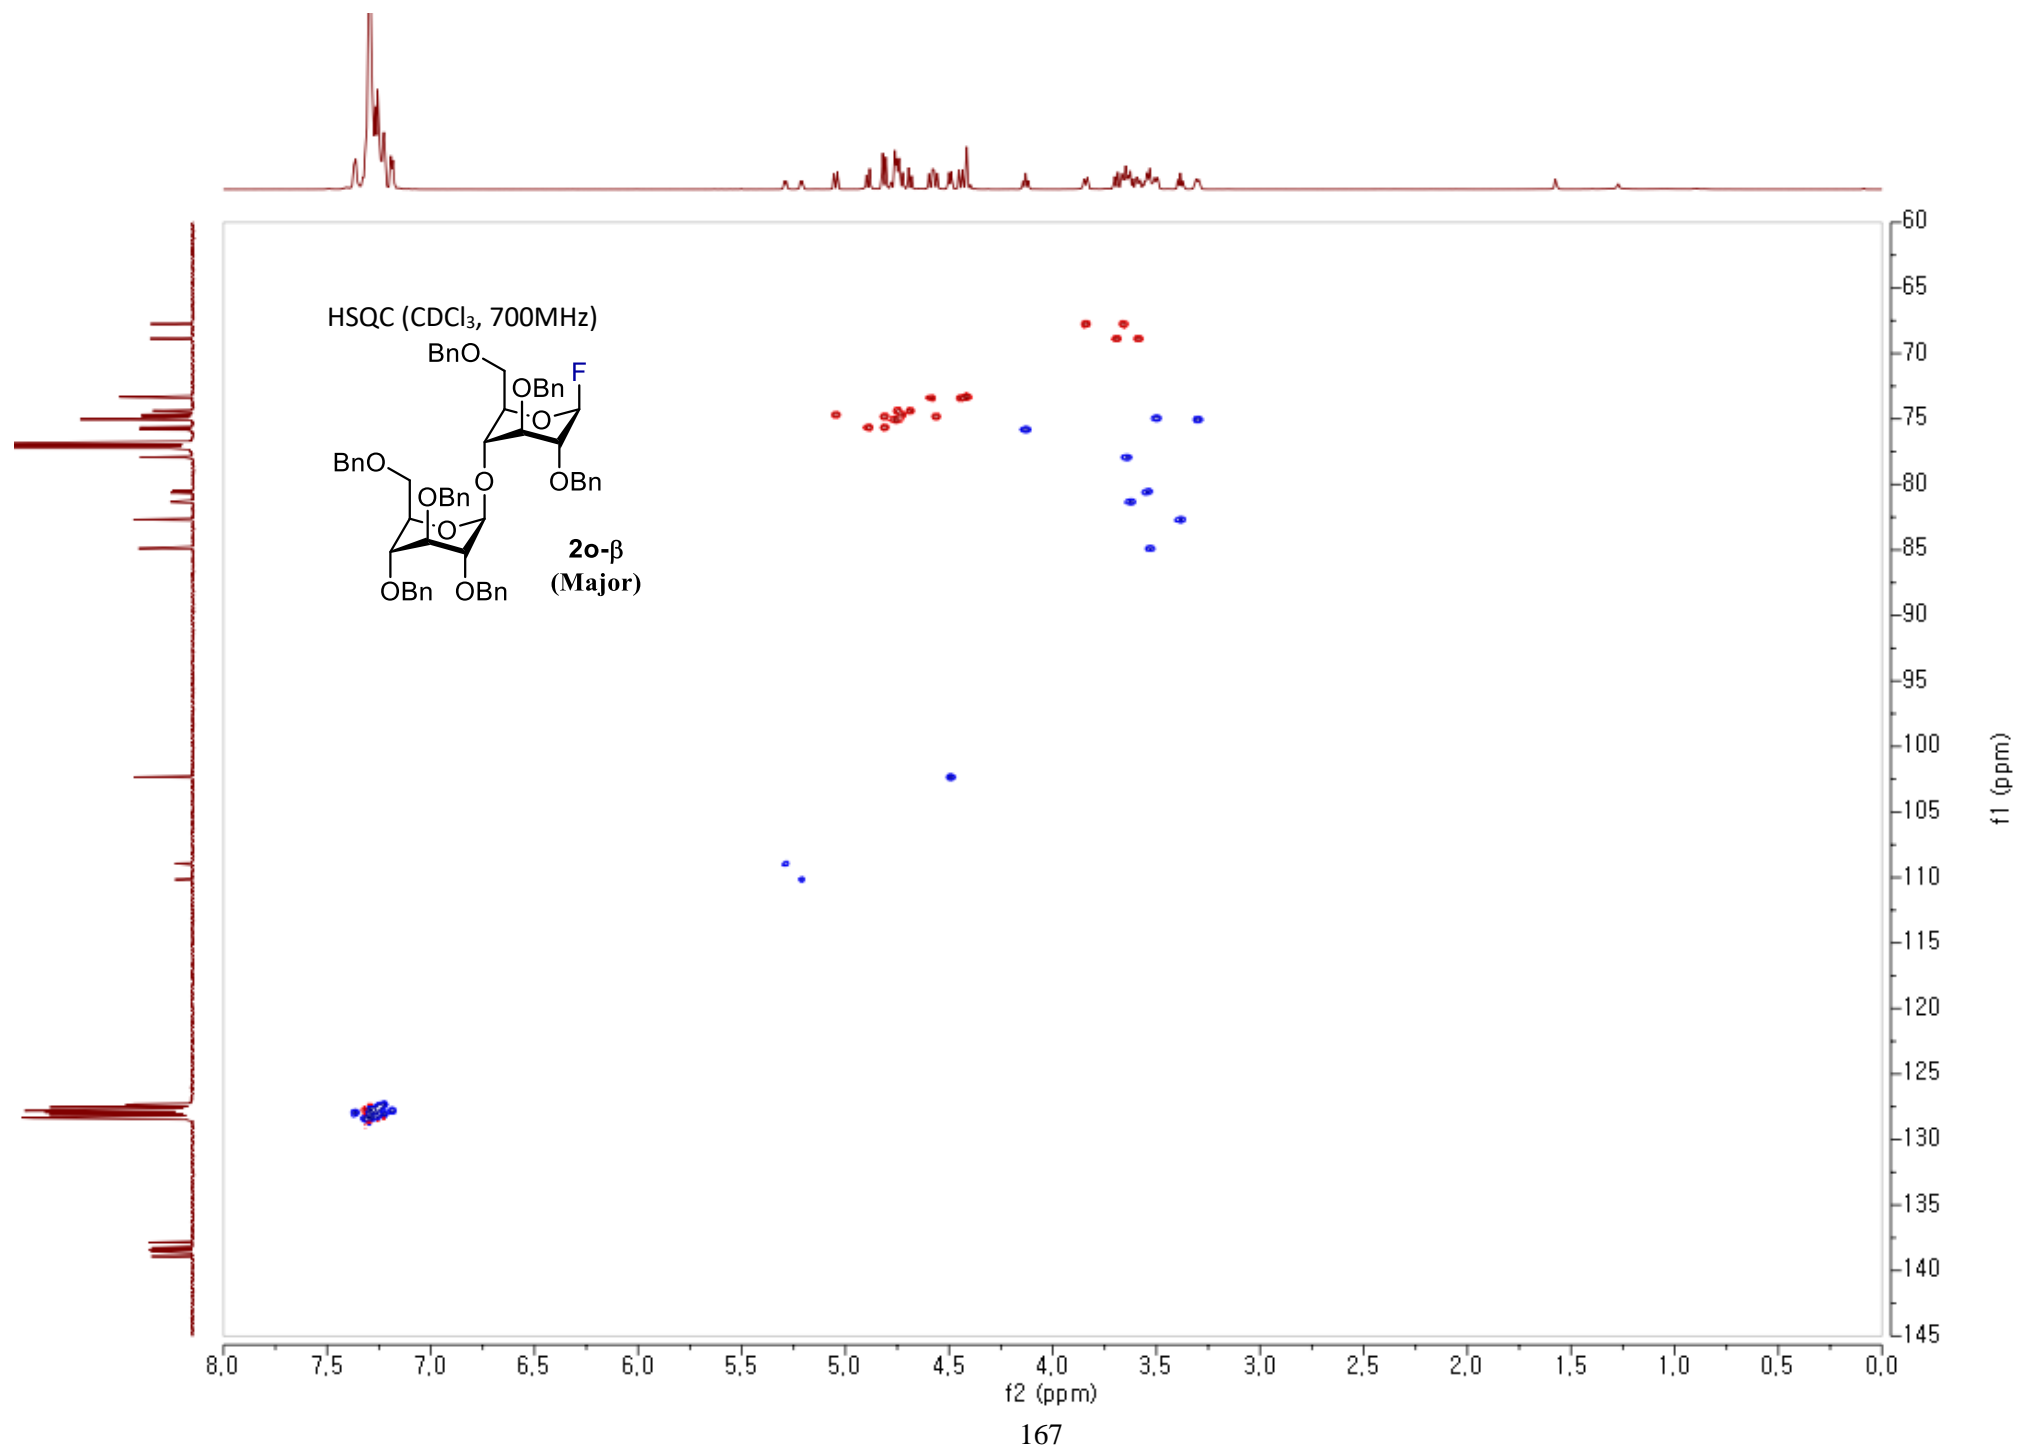

2,3,6-Tris-*O*-(phenylmethyl)-4-*O*-[2,3,4,6-tetrakis-*O*-(phenylmethyl)- $\beta$ -D-glucopyranosyl]- $\alpha$ -D-glucopyranosyl fluoride (2o- $\alpha$ , Minor diastereomer)

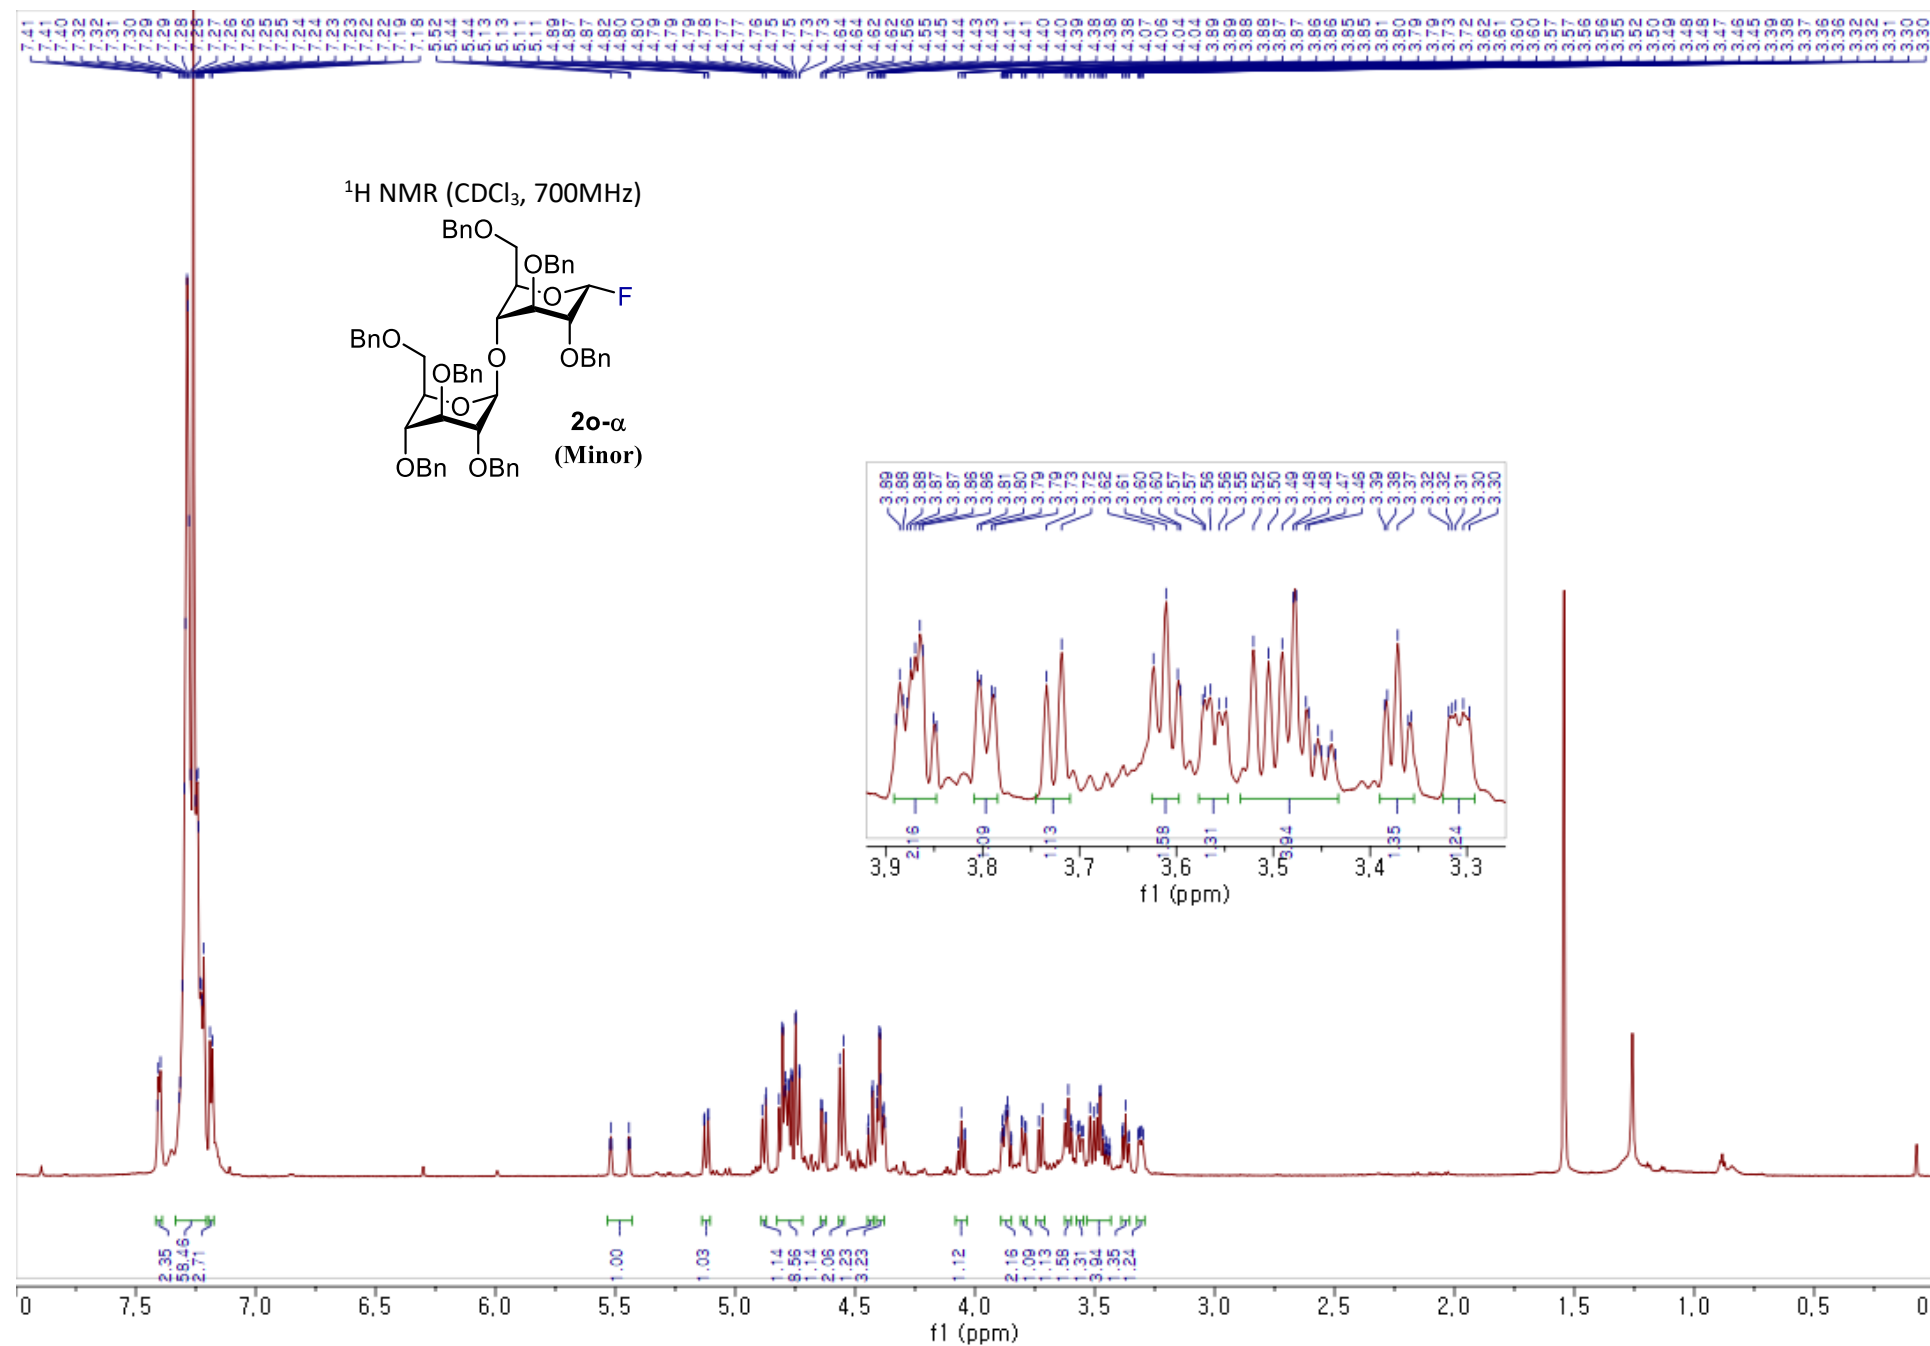

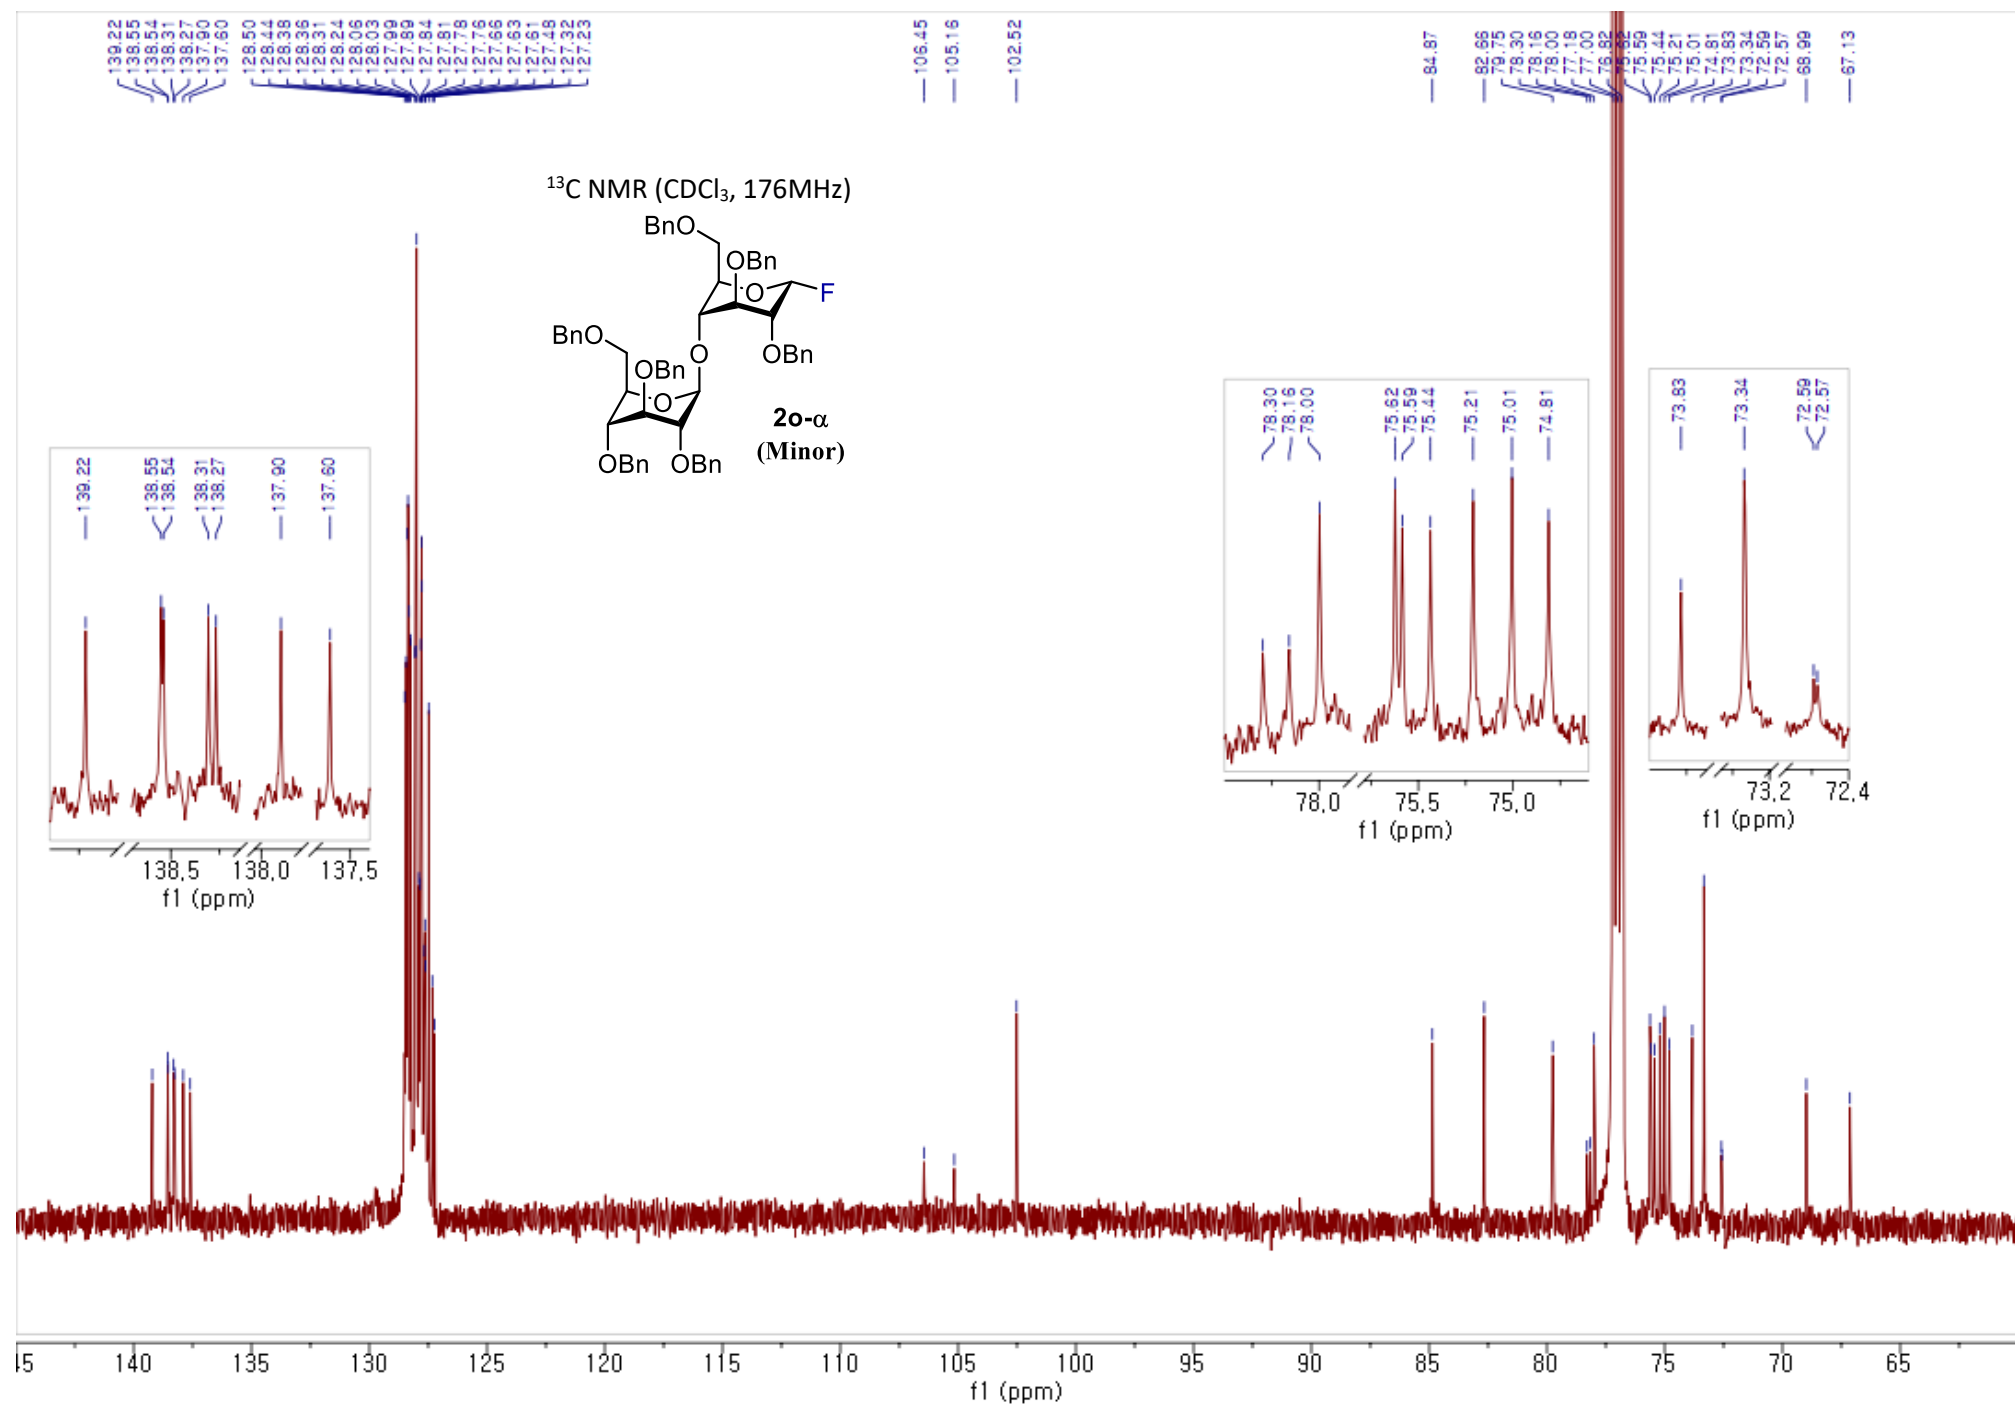

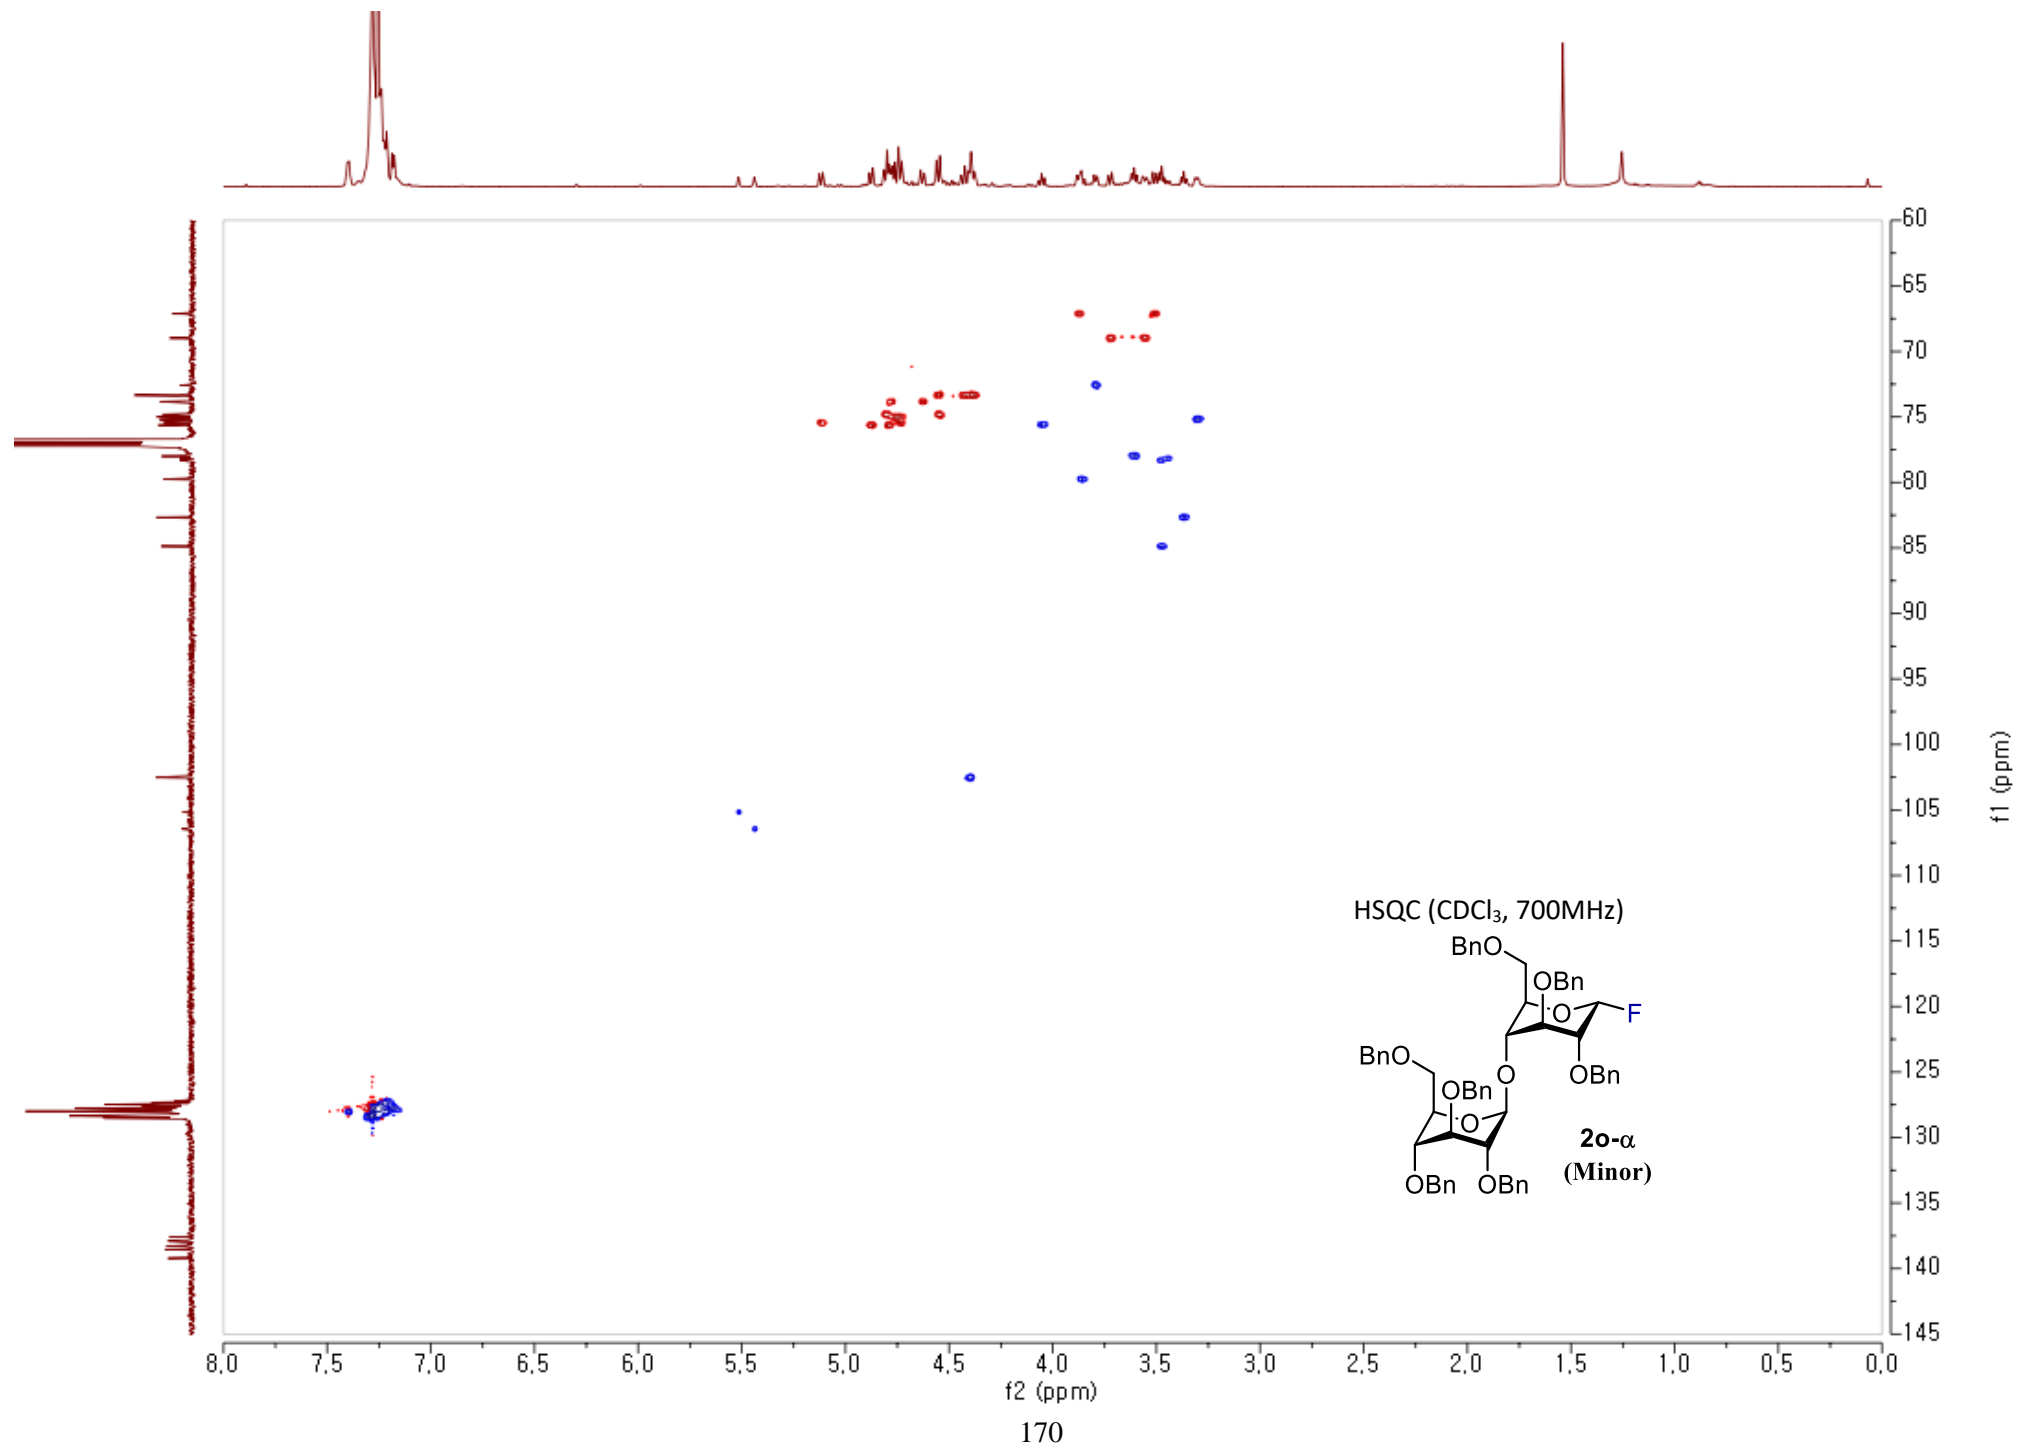

$^{19}\text{F}$  NMR ( $\text{CDCl}_3$ , 471MHz)

135.68  
135.70  
135.79  
135.82

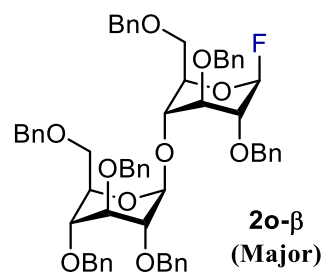

149.47  
149.52  
149.59  
149.64

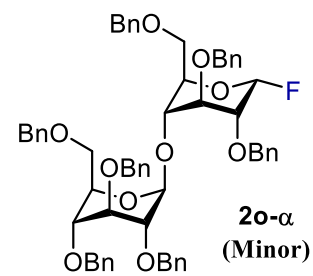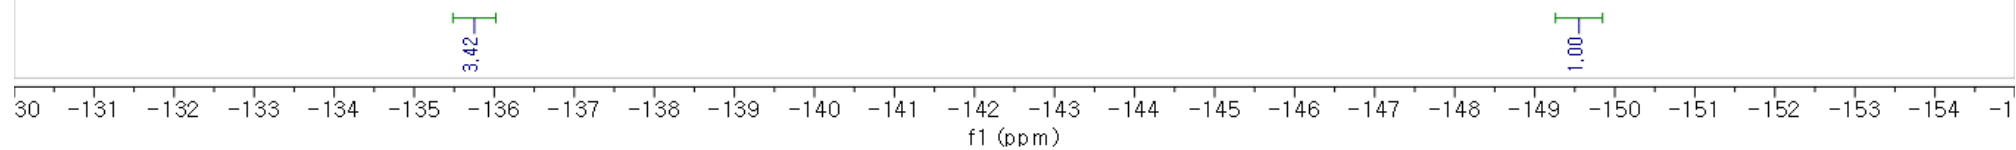

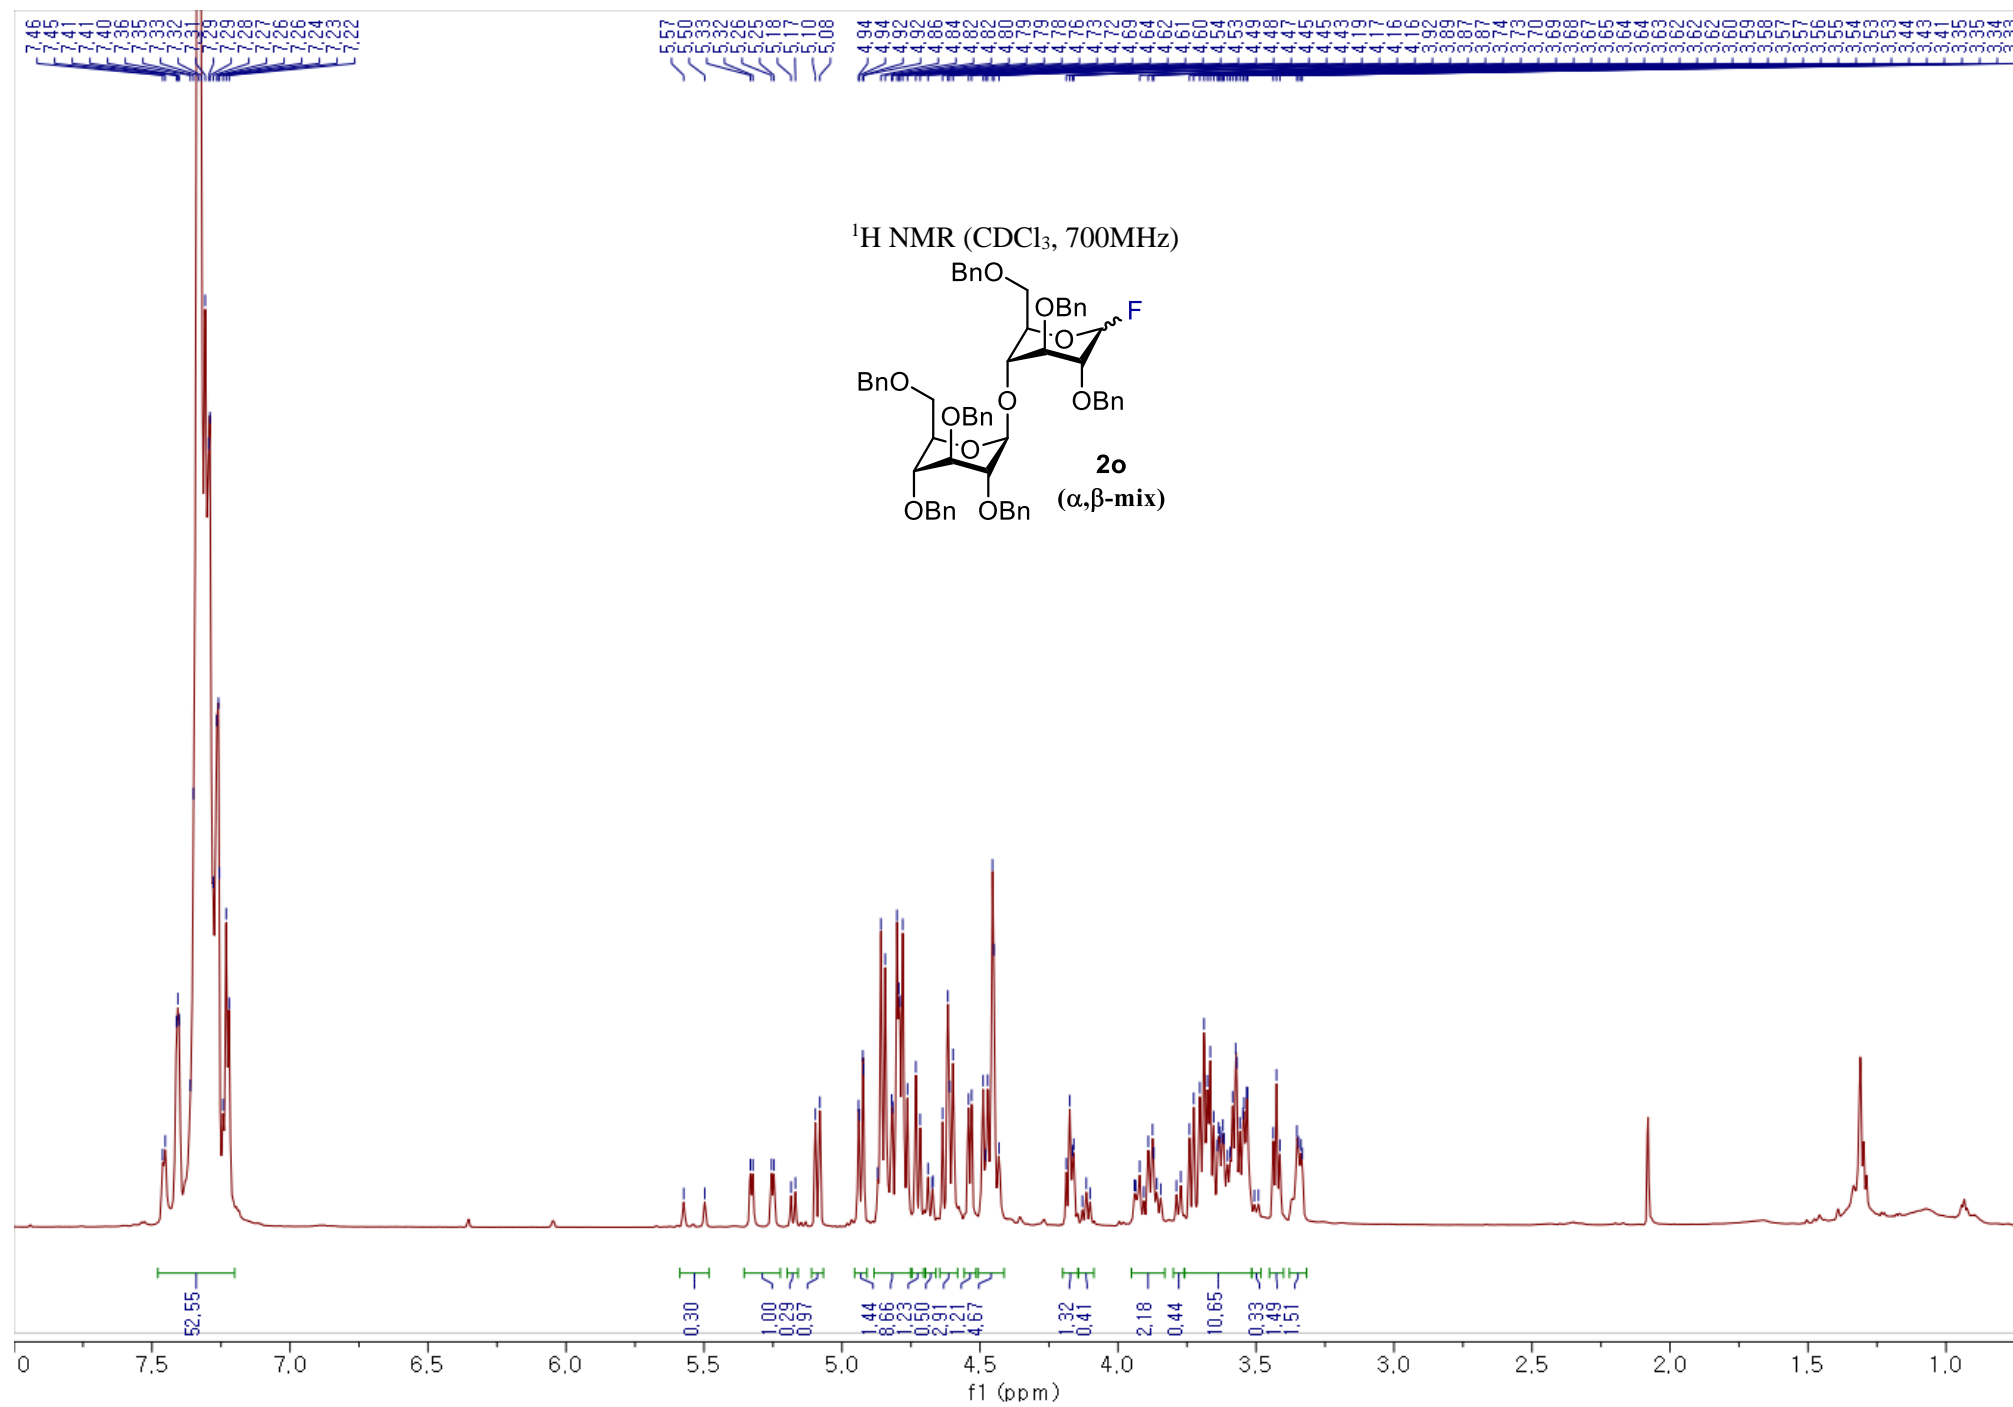

2,3,4,6-Tetrakis-O-[(4-methoxyphenyl)methyl]- $\beta$ -D-glucopyranosyl fluoride (2p- $\beta$ , Major product, Isolated as  $\alpha : \beta = 1 : 9.4$  mixture)

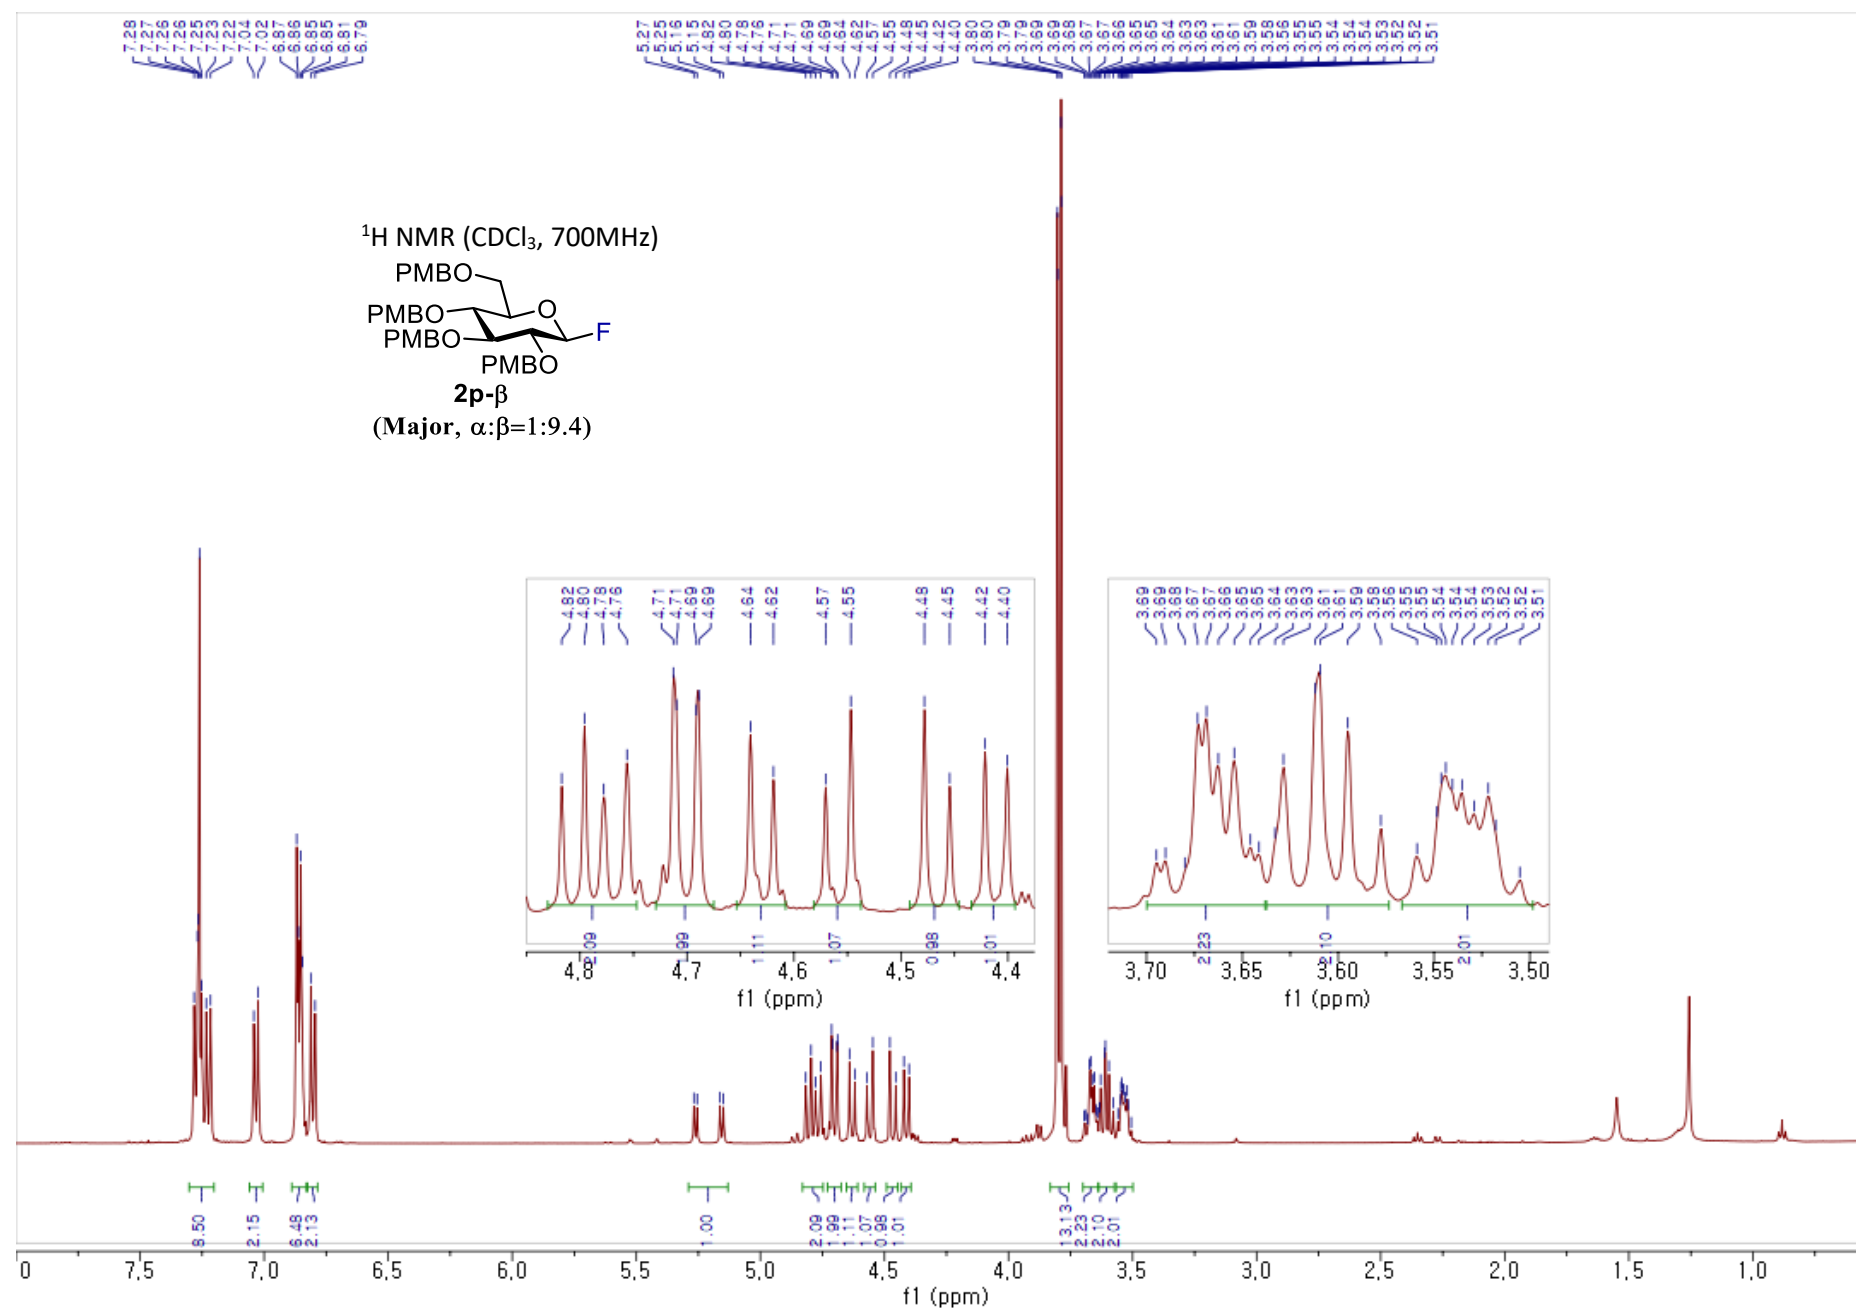

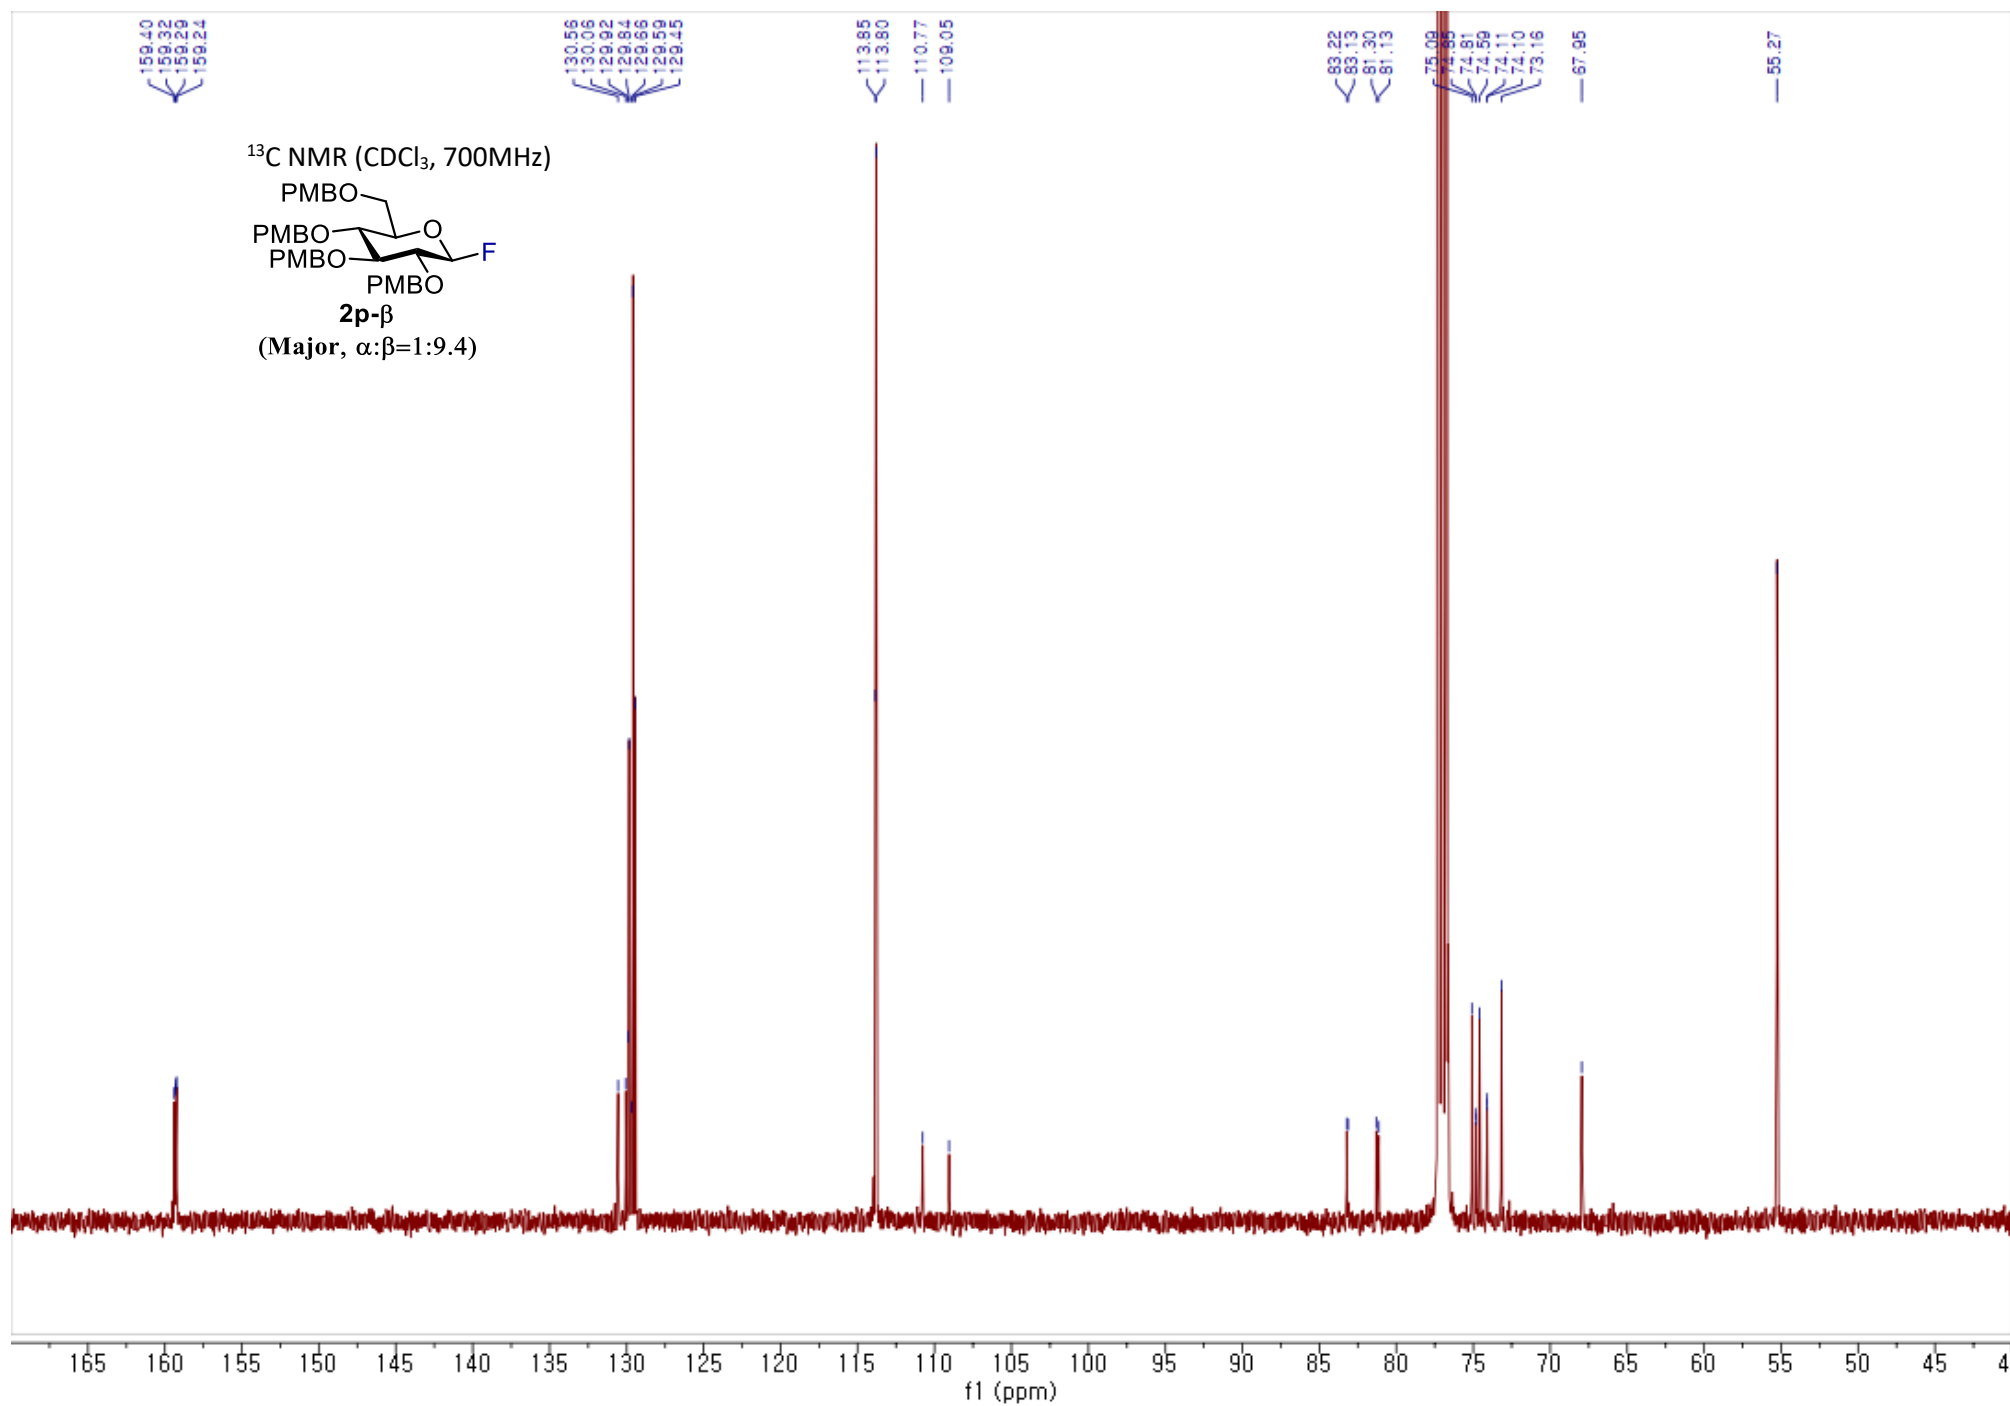

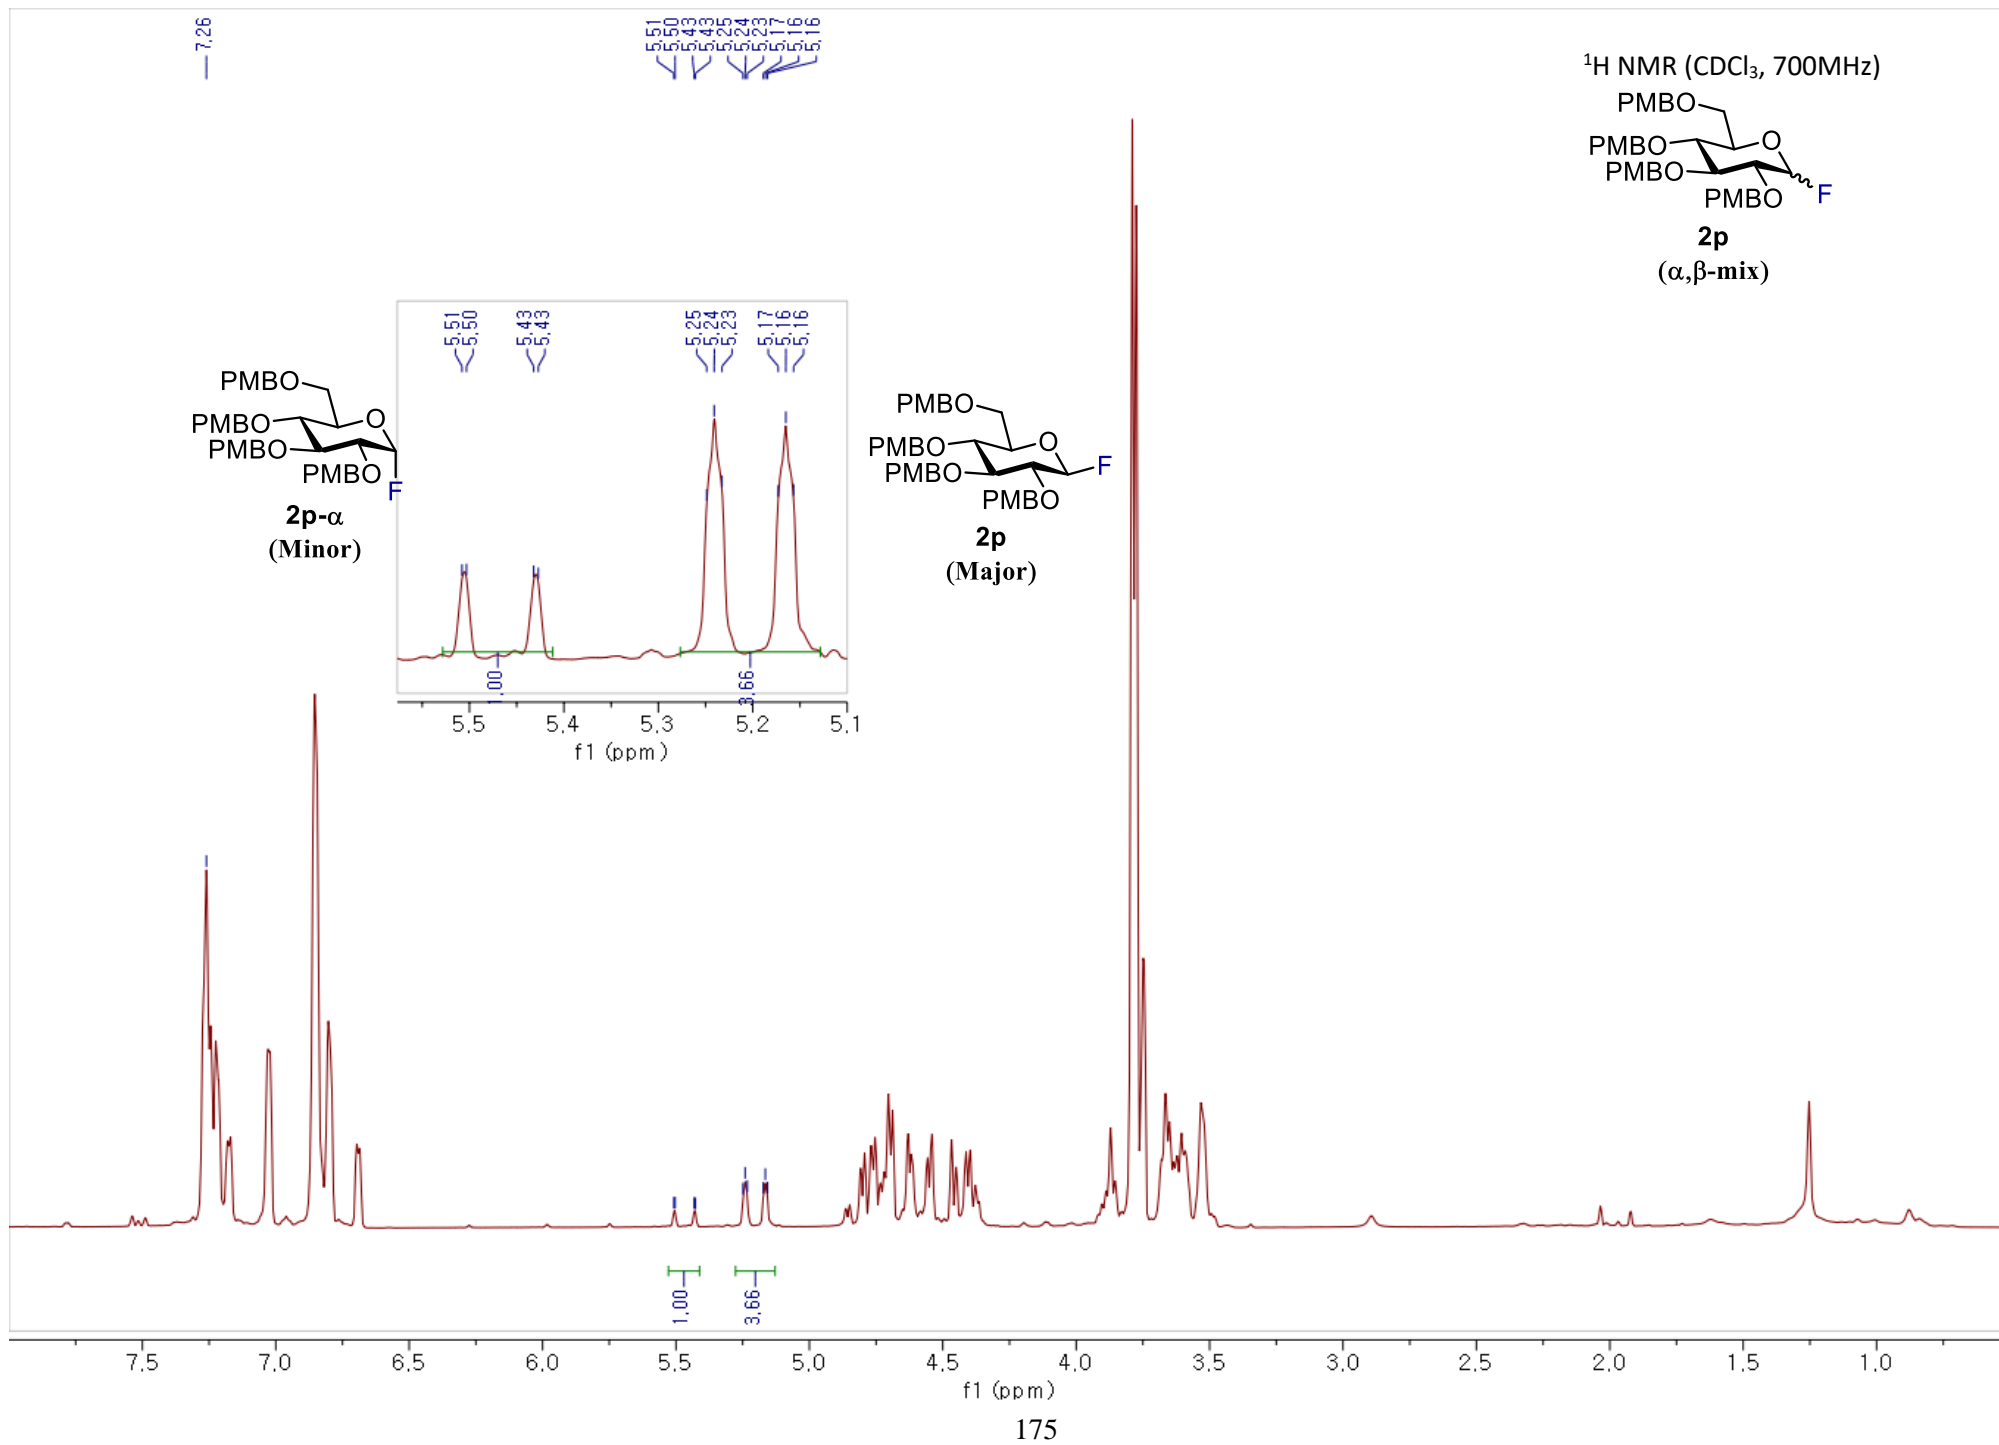

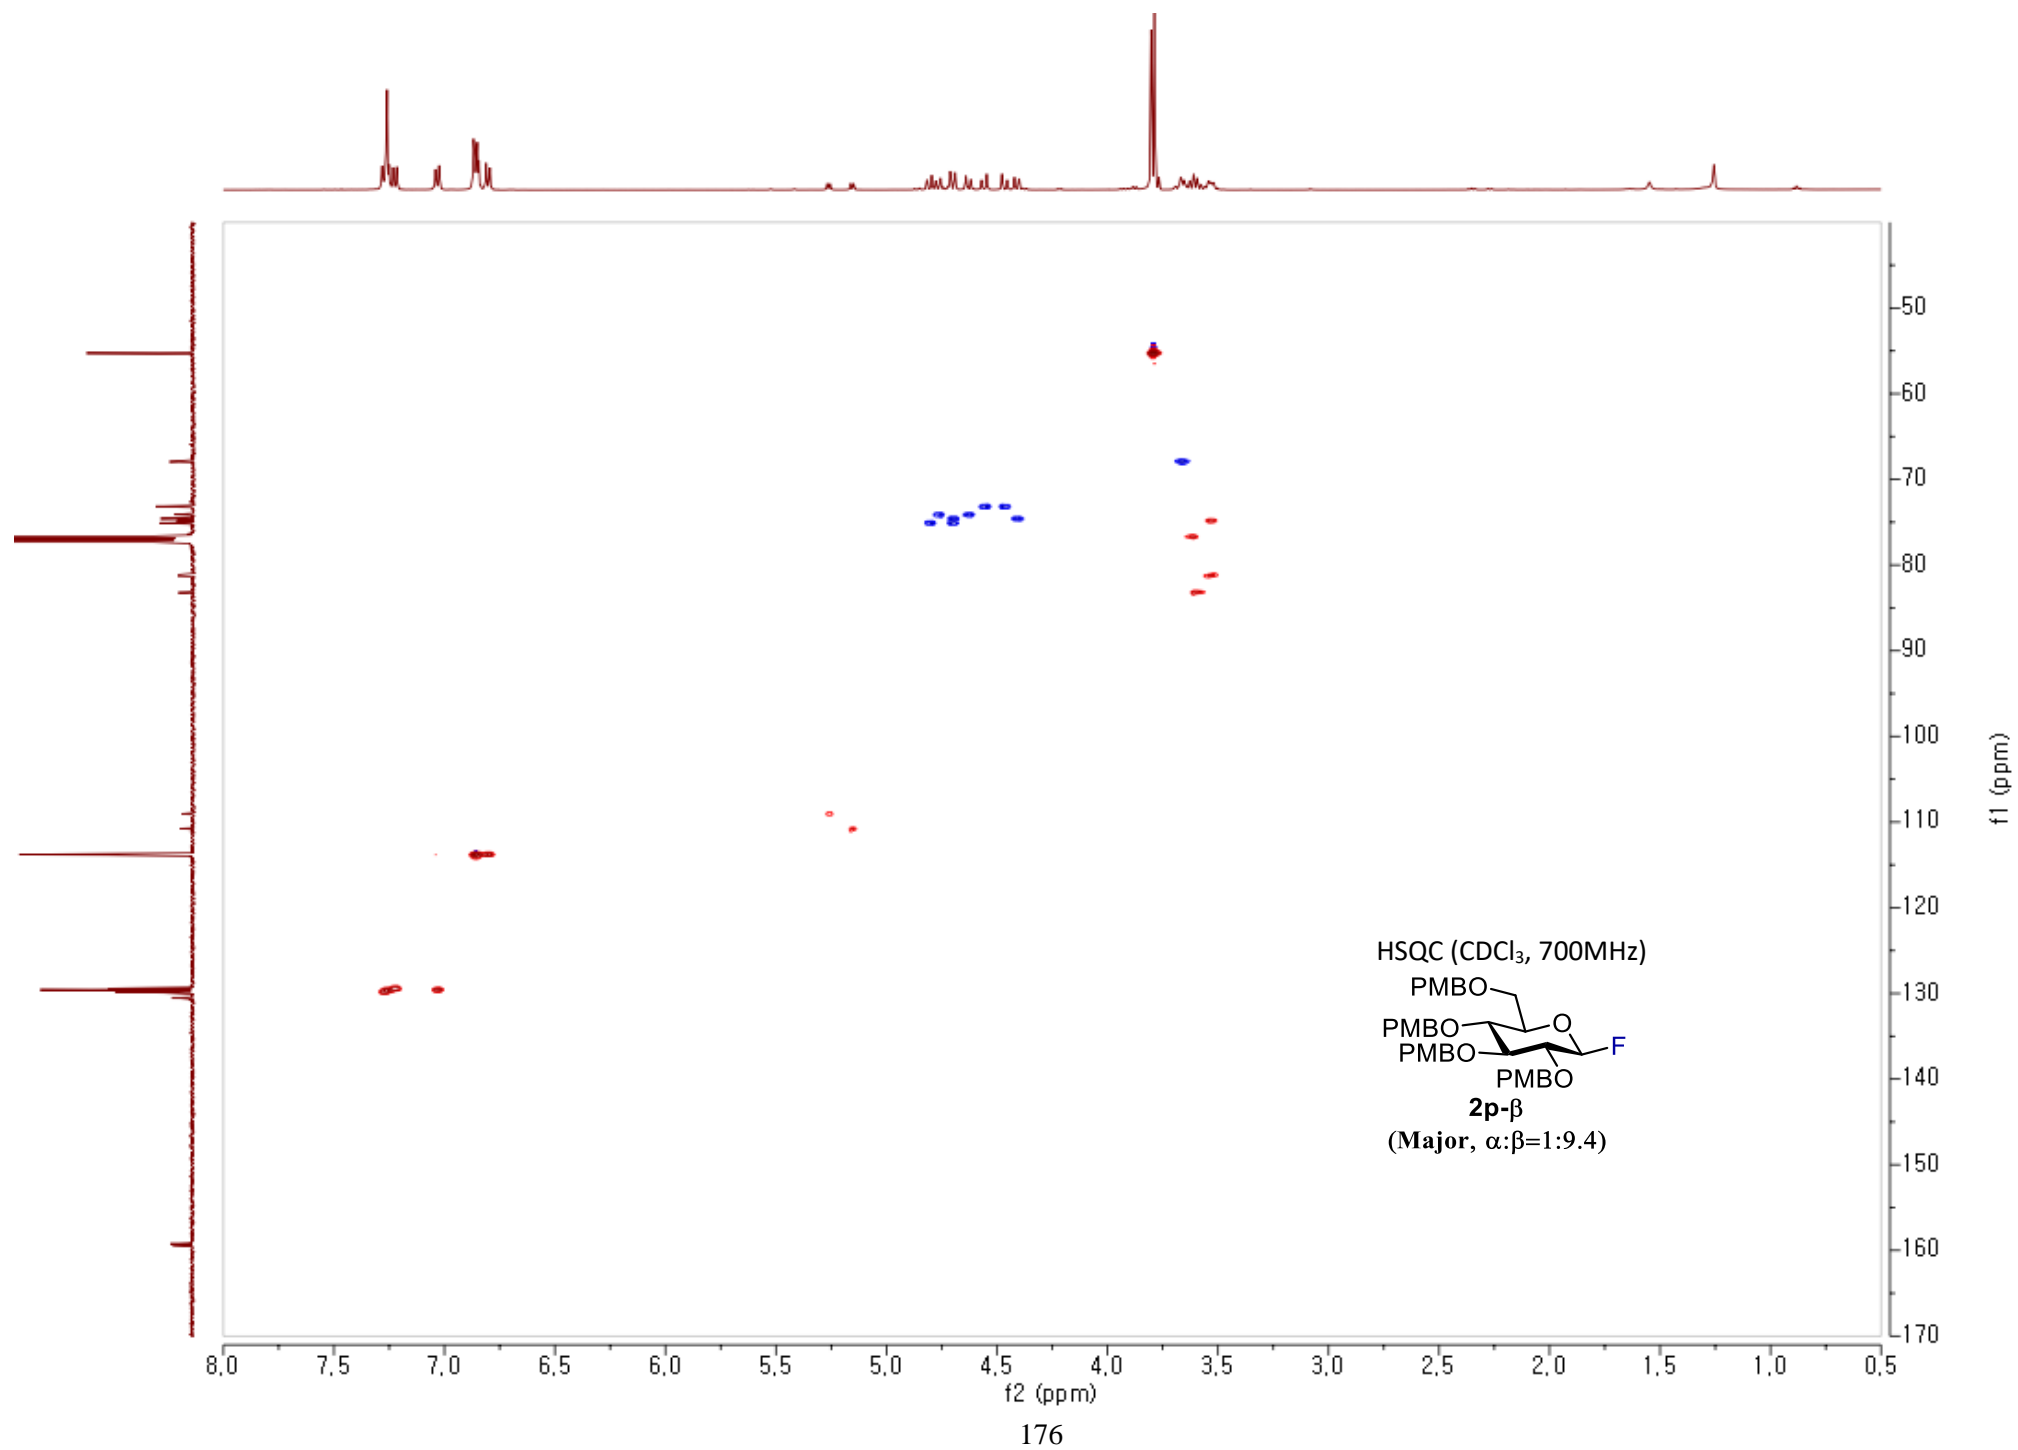

**1,1,2,2-Tetrakis(*p*-methoxyphenyl)-1,2-ethanediol**

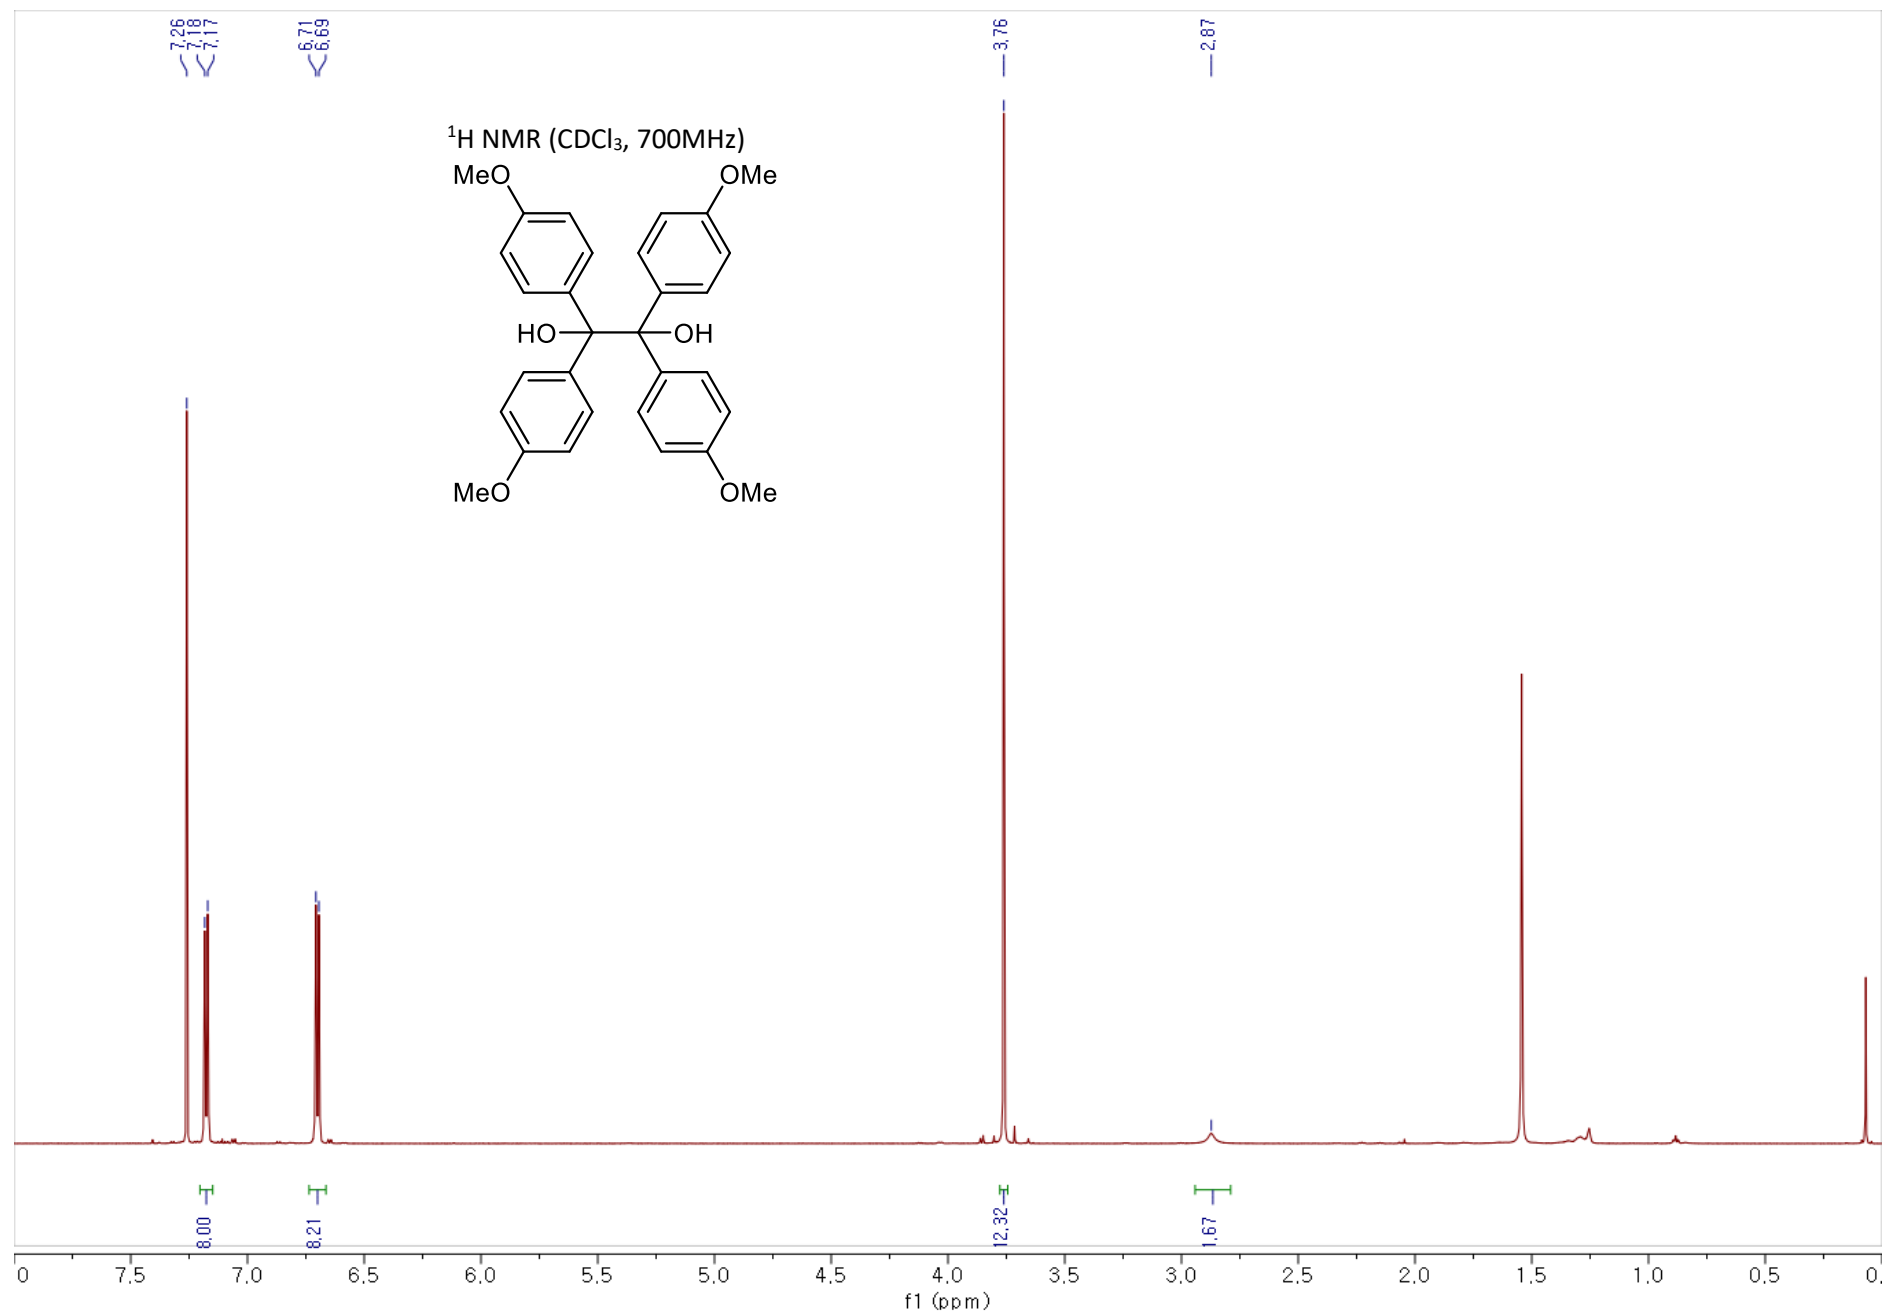

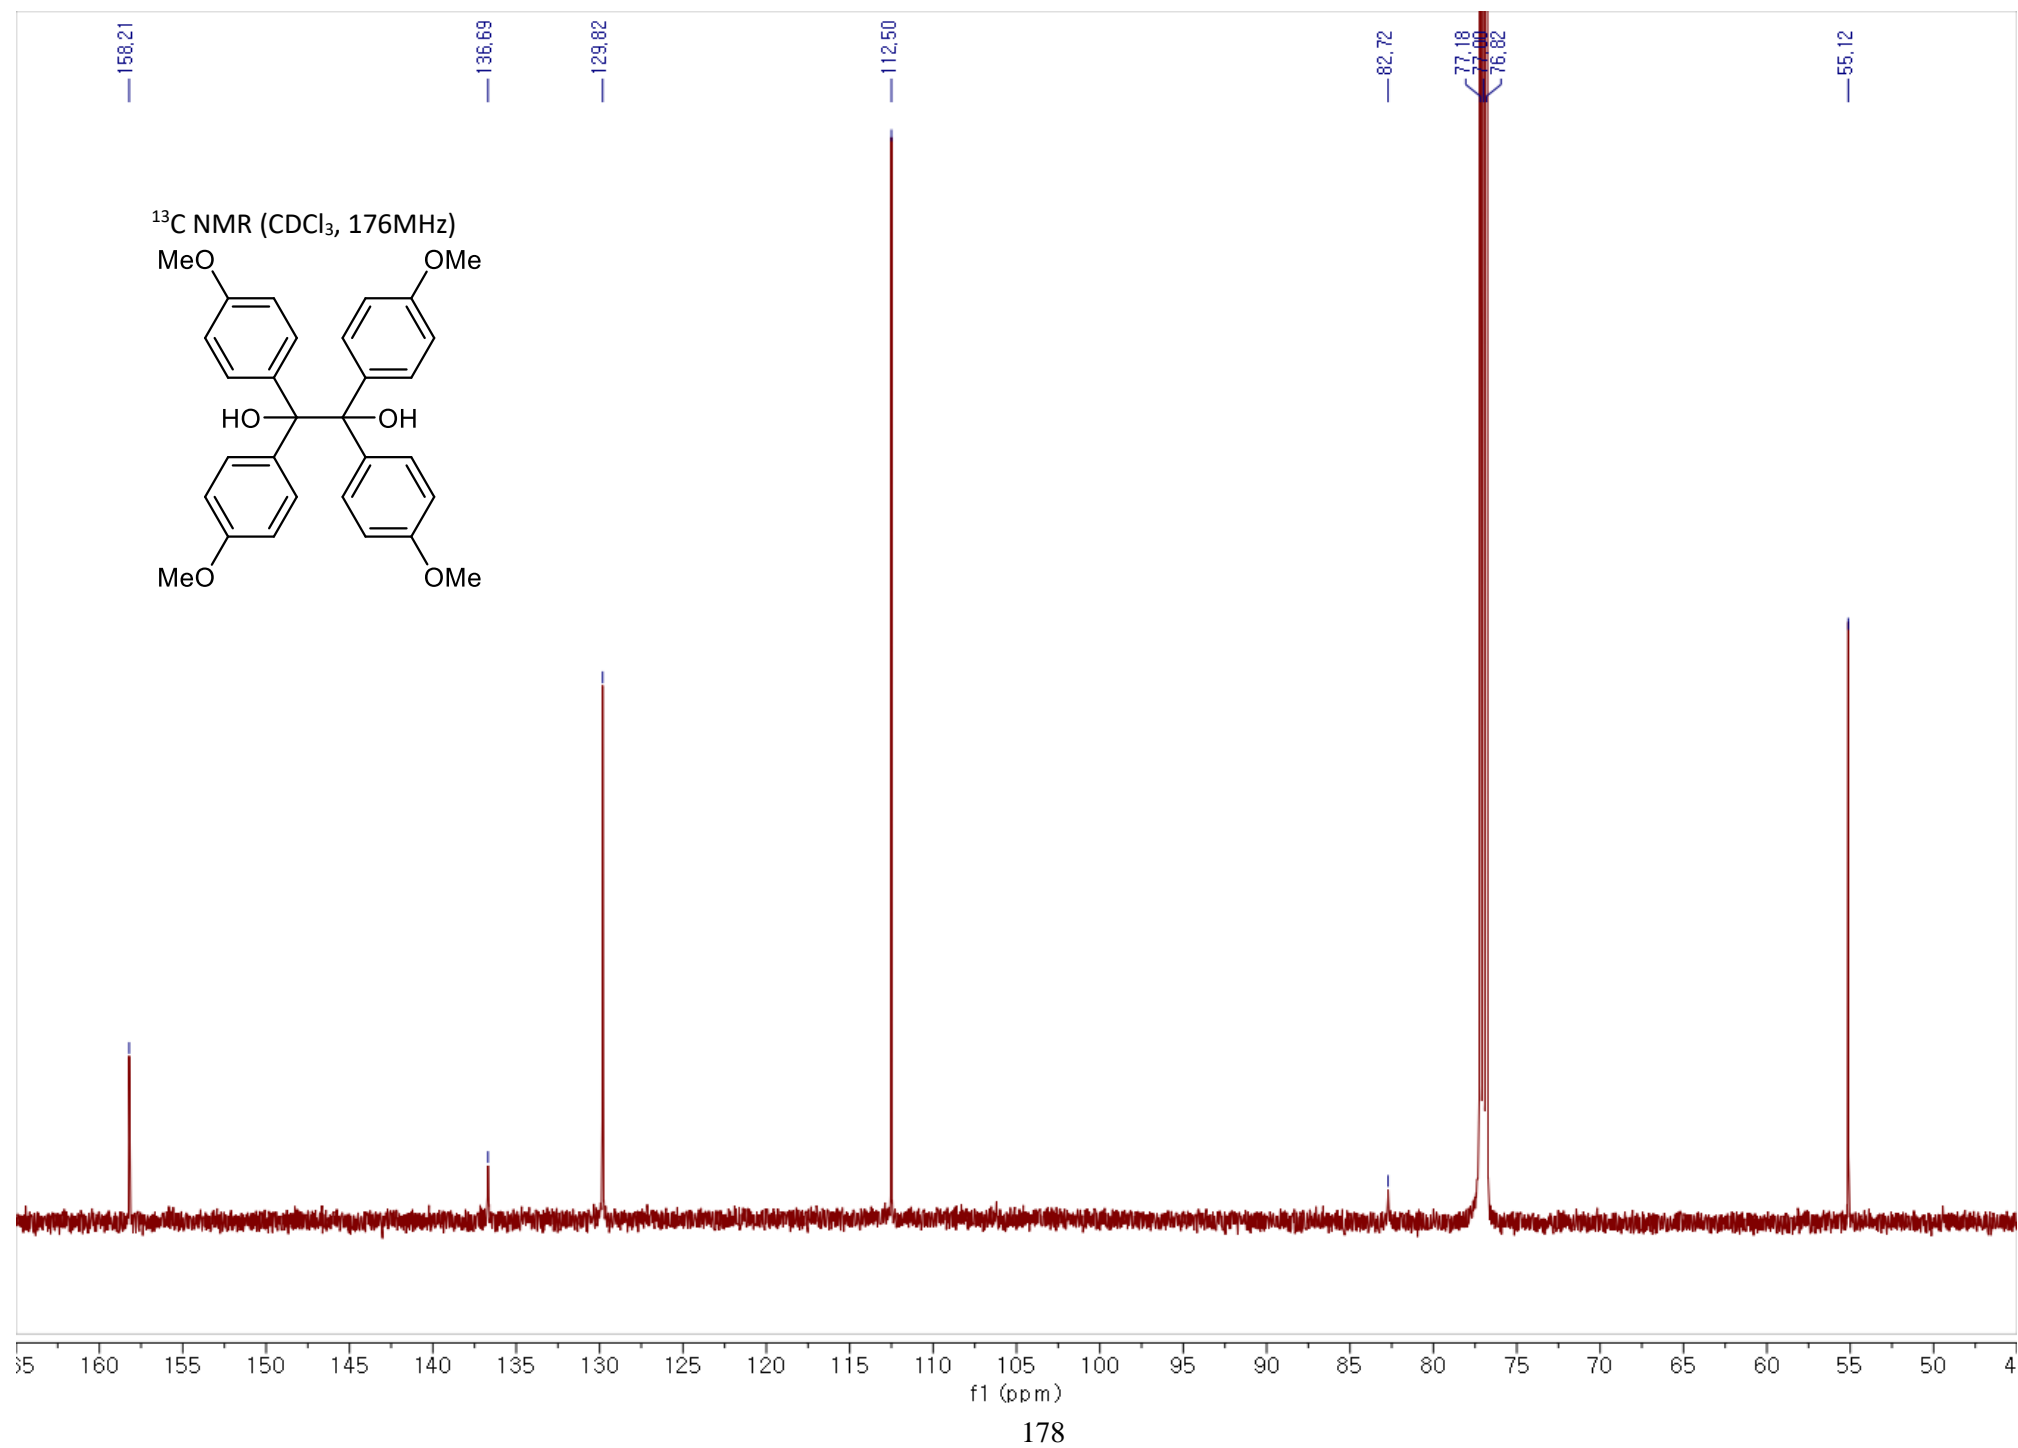

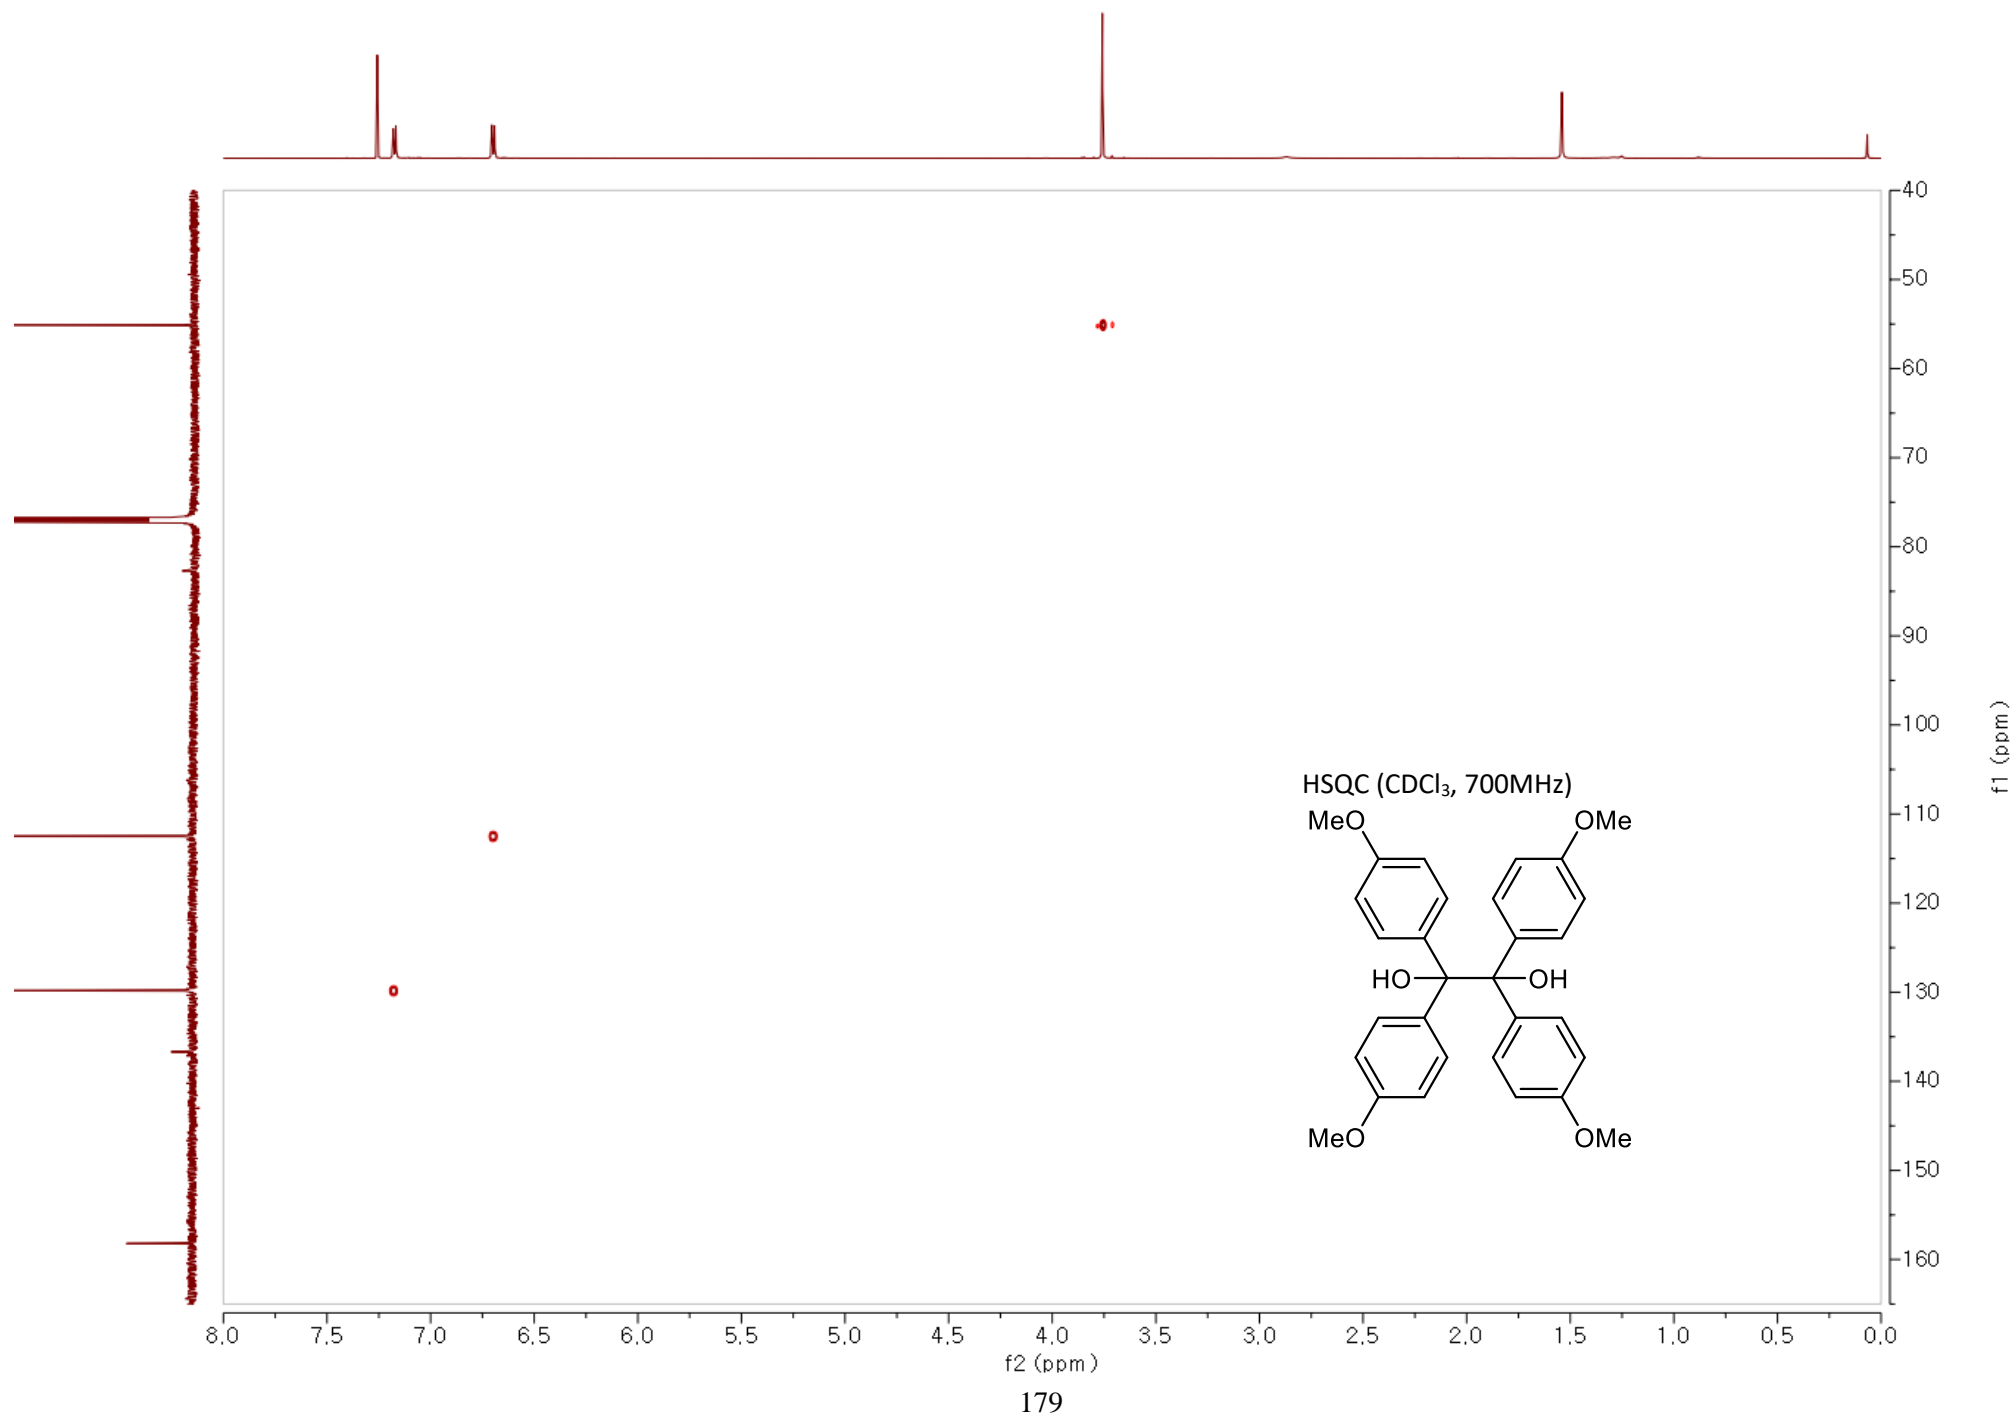

Supplement: Supplementary file 1 [file 25876826]
